# Supplementary material
Source: Elsevier journal article supplement (https://univ-rennes.hal.science/hal-01544469v1/file/mmc2.zip)
Supplement: mmc2 [file mmc2.zip]

Archive with 1 entries (1 files):
- mmc2.CIF
