# Supplementary material
Source: Elsevier journal article supplement (https://univ-rennes.hal.science/hal-01544469v1/file/mmc2.zip)
Supplement: mmc2 [file mmc2.zip › mmc2.CIF]

Compound I
 
data_TMP
 
_audit_creation_method            SHELXL-2014/6
_chemical_name_systematic         ?
_chemical_name_common             ?
_chemical_melting_point           ?
_chemical_formula_moiety          ?
_chemical_formula_sum
 'C30 H17 Cu F12 N3 O4 S' 
_chemical_formula_weight          807.07

loop_
 _atom_type_symbol
 _atom_type_description
 _atom_type_scat_dispersion_real
 _atom_type_scat_dispersion_imag
 _atom_type_scat_source
 'C'  'C'   0.0033   0.0016
 'International Tables Vol C Tables 4.2.6.8 and 6.1.1.4'
 'H'  'H'   0.0000   0.0000
 'International Tables Vol C Tables 4.2.6.8 and 6.1.1.4'
 'N'  'N'   0.0061   0.0033
 'International Tables Vol C Tables 4.2.6.8 and 6.1.1.4'
 'O'  'O'   0.0106   0.0060
 'International Tables Vol C Tables 4.2.6.8 and 6.1.1.4'
 'S'  'S'   0.1246   0.1234
 'International Tables Vol C Tables 4.2.6.8 and 6.1.1.4'
 'F'  'F'   0.0171   0.0103
 'International Tables Vol C Tables 4.2.6.8 and 6.1.1.4'
 'Cu'  'Cu'   0.3201   1.2651
 'International Tables Vol C Tables 4.2.6.8 and 6.1.1.4'
 
_space_group_crystal_system       monoclinic
_space_group_IT_number            14
_space_group_name_H-M_alt         'P 21/n'
_space_group_name_Hall            '-P 2yn'
 
_shelx_space_group_comment
;
The symmetry employed for this shelxl refinement is uniquely defined
by the following loop, which should always be used as a source of
symmetry information in preference to the above space-group names.
They are only intended as comments.
;
 
loop_
 _space_group_symop_operation_xyz
 'x, y, z'
 '-x+1/2, y+1/2, -z+1/2'
 '-x, -y, -z'
 'x-1/2, -y-1/2, z-1/2'
 
_cell_length_a                    12.243(2)
_cell_length_b                    15.603(3)
_cell_length_c                    16.475(3)
_cell_angle_alpha                 90
_cell_angle_beta                  90.73(3)
_cell_angle_gamma                 90
_cell_volume                      3146.8(11)
_cell_formula_units_Z             4
_cell_measurement_temperature     293(2)
_cell_measurement_reflns_used     ?
_cell_measurement_theta_min       ?
_cell_measurement_theta_max       ?
 
_exptl_crystal_description        ?
_exptl_crystal_colour             ?
_exptl_crystal_density_meas       ?
_exptl_crystal_density_method     ?
_exptl_crystal_density_diffrn     1.704          
_exptl_crystal_F_000              1612
_exptl_transmission_factor_min    ?
_exptl_transmission_factor_max    ?
_exptl_crystal_size_max           ?
_exptl_crystal_size_mid           ?
_exptl_crystal_size_min           ?
_exptl_absorpt_coefficient_mu     0.874
_shelx_estimated_absorpt_T_min    ?
_shelx_estimated_absorpt_T_max    ?
_exptl_absorpt_correction_type    ?
_exptl_absorpt_correction_T_min   ?
_exptl_absorpt_correction_T_max   ?
_exptl_absorpt_process_details    ?
_exptl_absorpt_special_details    ?
_diffrn_ambient_temperature       293(2)
_diffrn_radiation_wavelength      0.71073
_diffrn_radiation_type            MoK\a
_diffrn_source                    ?
_diffrn_measurement_device_type   ?
_diffrn_measurement_method        ?
_diffrn_detector_area_resol_mean  ?
_diffrn_reflns_number             65910
_diffrn_reflns_av_unetI/netI      0.0851
_diffrn_reflns_av_R_equivalents   0.1178
_diffrn_reflns_limit_h_min        -16
_diffrn_reflns_limit_h_max        17
_diffrn_reflns_limit_k_min        -22
_diffrn_reflns_limit_k_max        21
_diffrn_reflns_limit_l_min        -23
_diffrn_reflns_limit_l_max        23
_diffrn_reflns_theta_min          2.439
_diffrn_reflns_theta_max          30.340
_diffrn_reflns_theta_full         25.250
_diffrn_measured_fraction_theta_max   0.938
_diffrn_measured_fraction_theta_full  0.995
_diffrn_reflns_Laue_measured_fraction_max    0.938
_diffrn_reflns_Laue_measured_fraction_full   0.995
_diffrn_reflns_point_group_measured_fraction_max   0.938
_diffrn_reflns_point_group_measured_fraction_full  0.995
_reflns_number_total              8884
_reflns_number_gt                 4563
_reflns_threshold_expression      'I > 2\s(I)'
_reflns_Friedel_coverage          0.000
_reflns_Friedel_fraction_max      .
_reflns_Friedel_fraction_full     .
 
_reflns_special_details
;
 Reflections were merged by SHELXL according to the crystal
 class for the calculation of statistics and refinement.
 
 _reflns_Friedel_fraction is defined as the number of unique
 Friedel pairs measured divided by the number that would be
 possible theoretically, ignoring centric projections and
 systematic absences.
;
 
_computing_data_collection        ?
_computing_cell_refinement        ?
_computing_data_reduction         ?
_computing_structure_solution     ?
_computing_structure_refinement 'SHELXL-2014/6 (Sheldrick, 2014)'
_computing_molecular_graphics     ?
_computing_publication_material   ?
_refine_special_details           ?
_refine_ls_structure_factor_coef  Fsqd
_refine_ls_matrix_type            full
_refine_ls_weighting_scheme       calc
_refine_ls_weighting_details
'w=1/[\s^2^(Fo^2^)+(0.1176P)^2^+3.9899P] where P=(Fo^2^+2Fc^2^)/3'
_atom_sites_solution_primary      ?
_atom_sites_solution_secondary    ?
_atom_sites_solution_hydrogens    geom
_refine_ls_hydrogen_treatment     constr
_refine_ls_extinction_method      none
_refine_ls_extinction_coef        .
_refine_ls_number_reflns          8884
_refine_ls_number_parameters      505
_refine_ls_number_restraints      544
_refine_ls_R_factor_all           0.1540
_refine_ls_R_factor_gt            0.0771
_refine_ls_wR_factor_ref          0.2523
_refine_ls_wR_factor_gt           0.2072
_refine_ls_goodness_of_fit_ref    1.045
_refine_ls_restrained_S_all       1.066
_refine_ls_shift/su_max           0.002
_refine_ls_shift/su_mean          0.000
 
loop_
 _atom_site_label
 _atom_site_type_symbol
 _atom_site_fract_x
 _atom_site_fract_y
 _atom_site_fract_z
 _atom_site_U_iso_or_equiv
 _atom_site_adp_type
 _atom_site_occupancy
 _atom_site_site_symmetry_order  
 _atom_site_calc_flag
 _atom_site_refinement_flags_posn
 _atom_site_refinement_flags_adp
 _atom_site_refinement_flags_occupancy
 _atom_site_disorder_assembly
 _atom_site_disorder_group
Cu1 Cu 0.75367(4) 0.88667(3) 0.88286(3) 0.03399(19) Uani 1 1 d . U . . .
S1 S 1.36665(13) 0.35856(10) 0.91183(11) 0.0615(4) Uani 1 1 d . U . . .
N1 N 0.8765(3) 0.8003(2) 0.8858(2) 0.0340(7) Uani 1 1 d D U . . .
N2 N 1.2541(2) 0.6867(2) 0.8871(2) 0.0353(8) Uani 1 1 d D U . . .
N3 N 1.6314(3) 0.8008(2) 0.8876(2) 0.0342(7) Uani 1 1 d D U . . .
C1 C 1.0570(3) 0.7687(2) 0.8416(3) 0.0381(9) Uani 1 1 d D U . . .
H1 H 1.1167 0.7842 0.8105 0.046 Uiso 1 1 calc R U . . .
C2 C 0.9639(3) 0.8187(3) 0.8412(3) 0.0379(9) Uani 1 1 d D U . . .
H2 H 0.9619 0.8672 0.8085 0.045 Uiso 1 1 calc R U . . .
C3 C 0.8801(3) 0.7295(2) 0.9315(3) 0.0379(9) Uani 1 1 d D U . . .
H3 H 0.8200 0.7162 0.9631 0.046 Uiso 1 1 calc R U . . .
C4 C 0.9691(3) 0.6754(3) 0.9337(3) 0.0370(9) Uani 1 1 d D U . . .
H4 H 0.9678 0.6258 0.9650 0.044 Uiso 1 1 calc R U . . .
C5 C 1.0604(3) 0.6954(2) 0.8889(2) 0.0325(7) Uani 1 1 d D U . . .
C6 C 1.1607(3) 0.6424(2) 0.8881(3) 0.0329(8) Uani 1 1 d D U . . .
C7 C 1.1569(3) 0.5538(2) 0.8854(3) 0.0369(9) Uani 1 1 d D U . . .
H7 H 1.0901 0.5255 0.8877 0.044 Uiso 1 1 calc R U . . .
C8 C 1.2526(3) 0.5074(2) 0.8793(3) 0.0336(8) Uani 1 1 d D U . . .
C9 C 1.3493(3) 0.5532(2) 0.8781(3) 0.0381(9) Uani 1 1 d D U . . .
H9 H 1.4156 0.5246 0.8738 0.046 Uiso 1 1 calc R U . . .
C10 C 1.3469(3) 0.6417(2) 0.8835(3) 0.0344(8) Uani 1 1 d D U . . .
C11 C 1.4474(3) 0.6946(2) 0.8853(3) 0.0346(8) Uani 1 1 d D U . . .
C12 C 1.5405(3) 0.6739(3) 0.8429(3) 0.0395(9) Uani 1 1 d D U . . .
H12 H 1.5430 0.6234 0.8130 0.047 Uiso 1 1 calc R U . . .
C13 C 1.6298(3) 0.7280(2) 0.8448(3) 0.0392(9) Uani 1 1 d D U . . .
H13 H 1.6912 0.7132 0.8152 0.047 Uiso 1 1 calc R U . . .
C14 C 1.5422(3) 0.8209(3) 0.9294(3) 0.0400(10) Uani 1 1 d D U . . .
H14 H 1.5421 0.8712 0.9597 0.048 Uiso 1 1 calc R U . . .
C15 C 1.4501(3) 0.7699(2) 0.9295(3) 0.0413(10) Uani 1 1 d D U . . .
H15 H 1.3896 0.7862 0.9594 0.050 Uiso 1 1 calc R U . . .
C16 C 1.2527(4) 0.4129(2) 0.8756(3) 0.0415(8) Uani 1 1 d D U . . .
C17 C 1.3118(5) 0.2627(4) 0.8837(4) 0.0630(13) Uani 1 1 d D U . . .
H17 H 1.3471 0.2105 0.8915 0.076 Uiso 1 1 calc R U . . .
C18 C 1.2139(5) 0.2701(3) 0.8495(4) 0.0596(12) Uani 1 1 d D U . . .
H18 H 1.1737 0.2232 0.8310 0.071 Uiso 1 1 calc R U . . .
C19 C 1.1750(4) 0.3570(3) 0.8435(3) 0.0476(9) Uani 1 1 d D U . . .
C20 C 1.0723(5) 0.3773(4) 0.8055(5) 0.0682(16) Uani 1 1 d . U . . .
H20A H 1.0361 0.3253 0.7893 0.102 Uiso 1 1 calc R U . . .
H20B H 1.0274 0.4078 0.8431 0.102 Uiso 1 1 calc R U . . .
H20C H 1.0844 0.4123 0.7585 0.102 Uiso 1 1 calc R U . . .
O1A O 0.7539(3) 0.8827(2) 0.7447(2) 0.0542(8) Uani 1 1 d . U . . .
O2A O 0.6440(3) 0.9813(2) 0.8678(2) 0.0433(7) Uani 1 1 d . U . . .
C1A C 0.7285(4) 0.9470(3) 0.7048(2) 0.0489(10) Uani 1 1 d D U . . .
C2A C 0.6774(5) 1.0204(4) 0.7310(3) 0.0531(11) Uani 1 1 d . U . . .
H2A H 0.6674 1.0648 0.6939 0.064 Uiso 1 1 calc R U . . .
C3A C 0.6406(3) 1.0319(2) 0.8080(3) 0.0404(8) Uani 1 1 d D U . . .
C4A C 0.7584(4) 0.9428(3) 0.6160(3) 0.0899(15) Uani 1 1 d D U . . .
C5A C 0.5839(3) 1.1160(3) 0.8245(2) 0.0624(10) Uani 1 1 d D U . . .
O1B O 0.8645(3) 0.9801(2) 0.8789(2) 0.0407(7) Uani 1 1 d . U . . .
O2B O 0.7447(3) 0.9158(2) 1.0169(2) 0.0448(7) Uani 1 1 d . U . . .
C1B C 0.8781(3) 1.0395(2) 0.9294(2) 0.0387(8) Uani 1 1 d D U . . .
C2B C 0.8400(4) 1.0471(3) 1.0061(3) 0.0486(11) Uani 1 1 d . U . . .
H2B H 0.8561 1.0971 1.0346 0.058 Uiso 1 1 calc R U . . .
C3B C 0.7779(3) 0.9844(3) 1.0450(2) 0.0412(9) Uani 1 1 d D U . . .
C4B C 0.9417(3) 1.1132(2) 0.8936(2) 0.0575(9) Uani 1 1 d D U . . .
C5B C 0.7363(3) 1.0042(2) 1.1292(2) 0.0647(10) Uani 1 1 d D U . . .
F4AA F 0.7191(8) 1.0063(4) 0.5729(3) 0.138(3) Uani 0.643(8) 1 d D U P A 1
F4AB F 0.8655(4) 0.9460(8) 0.6064(4) 0.149(4) Uani 0.643(8) 1 d D U P A 1
F4AC F 0.7265(8) 0.8722(4) 0.5807(3) 0.127(3) Uani 0.643(8) 1 d D U P A 1
F4AD F 0.8145(10) 1.0089(6) 0.5916(4) 0.110(3) Uiso 0.357(8) 1 d D U P A 2
F4AE F 0.8151(10) 0.8745(6) 0.5977(5) 0.110(3) Uiso 0.357(8) 1 d D U P A 2
F4AF F 0.6706(6) 0.9399(9) 0.5685(3) 0.110(3) Uiso 0.357(8) 1 d D U P A 2
F5AA F 0.5713(6) 1.1315(3) 0.9014(2) 0.138(3) Uani 0.821(7) 1 d D U P B 1
F5AB F 0.4852(3) 1.1189(3) 0.7911(3) 0.0907(17) Uani 0.821(7) 1 d D U P B 1
F5AC F 0.6350(4) 1.1823(2) 0.7934(4) 0.0950(19) Uani 0.821(7) 1 d D U P B 1
F5AD F 0.4950(10) 1.1065(5) 0.8676(12) 0.110(3) Uiso 0.179(7) 1 d D U P B 2
F5AE F 0.5545(16) 1.1572(8) 0.7588(4) 0.110(3) Uiso 0.179(7) 1 d D U P B 2
F5AF F 0.6461(9) 1.1692(6) 0.8667(12) 0.110(3) Uiso 0.179(7) 1 d D U P B 2
F4BA F 0.9878(4) 1.1625(3) 0.9483(2) 0.117(2) Uani 0.893(6) 1 d D U P C 2
F4BB F 0.8801(3) 1.1626(3) 0.8475(3) 0.0877(16) Uani 0.893(6) 1 d D U P C 2
F4BC F 1.0216(3) 1.0873(3) 0.8464(2) 0.0796(14) Uani 0.893(6) 1 d D U P C 2
F4BD F 0.9006(18) 1.1883(3) 0.9130(18) 0.110(3) Uiso 0.107(6) 1 d D U P C 2
F4BE F 0.944(2) 1.1115(13) 0.8141(3) 0.110(3) Uiso 0.107(6) 1 d D U P C 2
F4BF F 1.0440(8) 1.1150(14) 0.9183(17) 0.110(3) Uiso 0.107(6) 1 d D U P C 2
F5BA F 0.6356(4) 1.0339(4) 1.1270(3) 0.117(2) Uani 0.927(7) 1 d D U P D 1
F5BB F 0.7950(4) 1.0618(3) 1.1676(2) 0.128(2) Uani 0.927(7) 1 d D U P D 1
F5BC F 0.7336(3) 0.93656(19) 1.17629(19) 0.0677(13) Uani 0.927(7) 1 d D U P D 1
F5BD F 0.692(3) 1.0805(12) 1.1342(9) 0.110(3) Uiso 0.073(7) 1 d D U P D 2
F5BE F 0.8144(9) 1.002(3) 1.1847(5) 0.110(3) Uiso 0.073(7) 1 d D U P D 2
F5BF F 0.662(3) 0.9497(17) 1.1534(12) 0.110(3) Uiso 0.073(7) 1 d D U P D 2
 
loop_
 _atom_site_aniso_label
 _atom_site_aniso_U_11
 _atom_site_aniso_U_22
 _atom_site_aniso_U_33
 _atom_site_aniso_U_23
 _atom_site_aniso_U_13
 _atom_site_aniso_U_12
Cu1 0.0319(3) 0.0266(3) 0.0435(3) -0.0023(2) 0.0006(2) 0.0007(2)
S1 0.0555(8) 0.0386(7) 0.0904(11) 0.0042(7) -0.0024(7) 0.0087(5)
N1 0.0317(7) 0.0266(8) 0.0436(16) -0.0036(9) -0.0005(8) 0.0005(7)
N2 0.0334(8) 0.0293(11) 0.043(2) -0.0024(12) -0.0009(9) 0.0016(8)
N3 0.0305(13) 0.0296(13) 0.0424(17) -0.0051(12) 0.0003(12) 0.0005(10)
C1 0.0329(11) 0.0303(12) 0.051(2) 0.0019(13) 0.0028(12) 0.0023(10)
C2 0.0331(9) 0.0309(15) 0.050(2) 0.0013(13) 0.0024(11) 0.0027(8)
C3 0.0336(12) 0.0300(10) 0.0503(19) 0.0011(12) 0.0027(12) 0.0026(9)
C4 0.0333(10) 0.0295(14) 0.048(2) 0.0003(13) 0.0022(12) 0.0023(8)
C5 0.0316(9) 0.0252(11) 0.0407(18) -0.0055(11) -0.0013(10) -0.0004(8)
C6 0.0332(8) 0.0286(9) 0.037(2) -0.0037(10) -0.0002(9) 0.0020(6)
C7 0.0335(13) 0.0285(9) 0.049(3) -0.0040(10) -0.0019(13) 0.0021(6)
C8 0.0343(13) 0.0281(7) 0.039(2) 0.0030(9) 0.0015(11) 0.0028(5)
C9 0.0351(13) 0.0298(10) 0.049(3) -0.0016(10) 0.0045(13) 0.0017(7)
C10 0.0336(8) 0.0297(10) 0.040(2) -0.0011(10) -0.0003(9) 0.0019(7)
C11 0.0342(9) 0.0311(11) 0.0385(19) 0.0004(12) -0.0012(11) 0.0011(8)
C12 0.0348(10) 0.0361(16) 0.048(2) -0.0092(15) 0.0017(12) -0.0035(10)
C13 0.0329(12) 0.0332(13) 0.052(2) -0.0108(14) 0.0029(13) -0.0012(11)
C14 0.0330(12) 0.0349(16) 0.052(2) -0.0099(15) 0.0050(13) -0.0010(9)
C15 0.0340(14) 0.0369(12) 0.053(2) -0.0088(14) 0.0043(14) -0.0023(10)
C16 0.0454(9) 0.0280(7) 0.051(2) 0.0025(9) 0.0127(11) 0.0025(5)
C17 0.0639(18) 0.0434(8) 0.082(3) 0.0001(12) 0.0125(19) 0.0005(8)
C18 0.0626(17) 0.0382(12) 0.078(3) 0.0053(14) 0.0147(18) -0.0025(10)
C19 0.0536(12) 0.0368(11) 0.053(2) 0.0026(13) 0.0120(14) -0.0058(9)
C20 0.0663(16) 0.046(3) 0.093(4) -0.007(3) -0.010(2) 0.0012(17)
O1A 0.066(2) 0.0530(15) 0.0435(4) -0.0030(3) 0.0010(4) 0.0059(14)
O2A 0.0431(10) 0.0371(9) 0.0499(14) 0.0023(9) 0.0045(9) 0.0113(9)
C1A 0.050(2) 0.0518(15) 0.0447(11) -0.0025(8) 0.0001(13) 0.0004(14)
C2A 0.056(3) 0.0529(16) 0.0506(13) -0.0029(10) 0.0034(13) 0.0023(16)
C3A 0.039(2) 0.0337(11) 0.0481(12) -0.0001(8) -0.0025(11) 0.0025(11)
C4A 0.128(3) 0.092(3) 0.0498(11) -0.0011(10) 0.0200(15) 0.012(2)
C5A 0.0684(18) 0.0408(12) 0.078(2) -0.0009(10) 0.0081(15) 0.0157(12)
O1B 0.0402(9) 0.0338(8) 0.0481(14) -0.0029(8) 0.0015(9) -0.0069(8)
O2B 0.0591(19) 0.0313(11) 0.0439(4) -0.0039(4) 0.0039(5) -0.0079(12)
C1B 0.0425(19) 0.0299(10) 0.0437(12) 0.0014(8) -0.0002(10) -0.0059(10)
C2B 0.061(2) 0.0380(15) 0.0470(12) -0.0023(10) 0.0076(13) -0.0134(16)
C3B 0.051(2) 0.0307(11) 0.0427(11) -0.0043(7) 0.0065(12) -0.0058(12)
C4B 0.0667(17) 0.0425(12) 0.0633(16) 0.0078(10) 0.0055(12) -0.0195(11)
C5B 0.105(2) 0.0401(15) 0.0502(11) -0.0050(7) 0.0261(12) -0.0017(13)
F4AA 0.239(8) 0.124(4) 0.053(3) 0.004(3) 0.027(4) 0.070(4)
F4AB 0.129(3) 0.215(11) 0.105(6) -0.002(6) 0.0275(17) 0.008(2)
F4AC 0.212(8) 0.103(3) 0.065(4) -0.006(2) 0.011(4) -0.012(4)
F5AA 0.254(8) 0.083(4) 0.079(2) 0.0023(12) 0.0167(17) 0.101(5)
F5AB 0.0746(19) 0.088(4) 0.110(4) 0.002(3) -0.006(2) 0.0161(16)
F5AC 0.097(3) 0.0540(16) 0.134(4) 0.016(2) 0.027(3) 0.0075(19)
F4BA 0.162(5) 0.120(3) 0.0696(19) -0.0080(19) 0.017(2) -0.101(3)
F4BB 0.082(2) 0.079(2) 0.102(3) 0.038(2) -0.002(2) -0.0120(18)
F4BC 0.080(2) 0.078(2) 0.081(2) 0.002(2) 0.0171(18) -0.0099(18)
F5BA 0.118(2) 0.139(5) 0.096(3) 0.018(3) 0.0340(17) 0.035(2)
F5BB 0.194(4) 0.129(3) 0.063(2) -0.033(2) 0.051(2) -0.090(3)
F5BC 0.097(3) 0.0465(15) 0.0605(17) 0.0031(13) 0.0169(18) -0.0082(15)
 
_geom_special_details
;
 All esds (except the esd in the dihedral angle between two l.s. planes)
 are estimated using the full covariance matrix.  The cell esds are taken
 into account individually in the estimation of esds in distances, angles
 and torsion angles; correlations between esds in cell parameters are only
 used when they are defined by crystal symmetry.  An approximate (isotropic)
 treatment of cell esds is used for estimating esds involving l.s. planes.
;
 
loop_
 _geom_bond_atom_site_label_1
 _geom_bond_atom_site_label_2
 _geom_bond_distance
 _geom_bond_site_symmetry_2
 _geom_bond_publ_flag
Cu1 O1B 1.993(3) . ?
Cu1 O2A 2.009(3) . ?
Cu1 N3 2.011(3) 1_455 ?
Cu1 N1 2.019(3) . ?
Cu1 O2B 2.259(3) . ?
Cu1 O1A 2.277(4) . ?
S1 C17 1.702(6) . ?
S1 C16 1.732(5) . ?
N1 C3 1.337(3) . ?
N1 C2 1.338(3) . ?
N2 C6 1.337(3) . ?
N2 C10 1.338(3) . ?
N3 C14 1.336(3) . ?
N3 C13 1.337(3) . ?
N3 Cu1 2.012(3) 1_655 ?
C1 C2 1.380(3) . ?
C1 C5 1.385(3) . ?
C1 H1 0.9300 . ?
C2 H2 0.9300 . ?
C3 C4 1.379(3) . ?
C3 H3 0.9300 . ?
C4 C5 1.383(3) . ?
C4 H4 0.9300 . ?
C5 C6 1.481(4) . ?
C6 C7 1.383(3) . ?
C7 C8 1.383(3) . ?
C7 H7 0.9300 . ?
C8 C9 1.383(3) . ?
C8 C16 1.477(4) . ?
C9 C10 1.384(3) . ?
C9 H9 0.9300 . ?
C10 C11 1.481(4) . ?
C11 C12 1.382(3) . ?
C11 C15 1.383(3) . ?
C12 C13 1.382(3) . ?
C12 H12 0.9300 . ?
C13 H13 0.9300 . ?
C14 C15 1.380(3) . ?
C14 H14 0.9300 . ?
C15 H15 0.9300 . ?
C16 C19 1.391(7) . ?
C17 C18 1.323(8) . ?
C17 H17 0.9300 . ?
C18 C19 1.440(8) . ?
C18 H18 0.9300 . ?
C19 C20 1.433(8) . ?
C20 H20A 0.9600 . ?
C20 H20B 0.9600 . ?
C20 H20C 0.9600 . ?
O1A C1A 1.236(6) . ?
O2A C3A 1.262(5) . ?
C1A C2A 1.377(7) . ?
C1A C4A 1.515(5) . ?
C2A C3A 1.364(7) . ?
C2A H2A 0.9300 . ?
C3A C5A 1.511(5) . ?
C4A F4AC 1.304(3) . ?
C4A F4AD 1.305(3) . ?
C4A F4AA 1.307(3) . ?
C4A F4AE 1.310(3) . ?
C4A F4AB 1.324(3) . ?
C4A F4AF 1.322(3) . ?
C5A F5AA 1.300(3) . ?
C5A F5AE 1.306(3) . ?
C5A F5AC 1.317(3) . ?
C5A F5AD 1.315(3) . ?
C5A F5AF 1.319(3) . ?
C5A F5AB 1.323(3) . ?
O1B C1B 1.255(5) . ?
O2B C3B 1.234(5) . ?
C1B C2B 1.359(6) . ?
C1B C4B 1.511(5) . ?
C2B C3B 1.399(6) . ?
C2B H2B 0.9300 . ?
C3B C5B 1.515(5) . ?
C4B F4BA 1.307(3) . ?
C4B F4BE 1.311(3) . ?
C4B F4BF 1.312(3) . ?
C4B F4BB 1.313(3) . ?
C4B F4BD 1.316(3) . ?
C4B F4BC 1.321(3) . ?
C5B F5BB 1.308(3) . ?
C5B F5BD 1.312(3) . ?
C5B F5BF 1.310(3) . ?
C5B F5BC 1.311(3) . ?
C5B F5BA 1.318(3) . ?
C5B F5BE 1.315(3) . ?
F4BA F4BF 1.13(3) . ?
F4BA F4BD 1.27(3) . ?
F4BB F4BE 1.25(3) . ?
F4BB F4BD 1.17(3) . ?
F4BC F4BE 1.15(3) . ?
F4BC F4BF 1.29(3) . ?
 
loop_
 _geom_angle_atom_site_label_1
 _geom_angle_atom_site_label_2
 _geom_angle_atom_site_label_3
 _geom_angle
 _geom_angle_site_symmetry_1
 _geom_angle_site_symmetry_3
 _geom_angle_publ_flag
O1B Cu1 O2A 84.99(15) . . ?
O1B Cu1 N3 174.78(13) . 1_455 ?
O2A Cu1 N3 89.89(14) . 1_455 ?
O1B Cu1 N1 88.96(13) . . ?
O2A Cu1 N1 171.79(13) . . ?
N3 Cu1 N1 96.23(13) 1_455 . ?
O1B Cu1 O2B 85.78(13) . . ?
O2A Cu1 O2B 86.11(14) . . ?
N3 Cu1 O2B 92.88(13) 1_455 . ?
N1 Cu1 O2B 99.00(14) . . ?
O1B Cu1 O1A 88.71(14) . . ?
O2A Cu1 O1A 84.58(14) . . ?
N3 Cu1 O1A 91.81(15) 1_455 . ?
N1 Cu1 O1A 89.74(14) . . ?
O2B Cu1 O1A 169.57(13) . . ?
C17 S1 C16 91.3(3) . . ?
C3 N1 C2 117.7(4) . . ?
C3 N1 Cu1 125.8(2) . . ?
C2 N1 Cu1 116.4(2) . . ?
C6 N2 C10 117.1(3) . . ?
C14 N3 C13 117.7(4) . . ?
C14 N3 Cu1 118.5(2) . 1_655 ?
C13 N3 Cu1 123.4(3) . 1_655 ?
C2 C1 C5 119.2(4) . . ?
C2 C1 H1 120.4 . . ?
C5 C1 H1 120.4 . . ?
N1 C2 C1 122.9(4) . . ?
N1 C2 H2 118.6 . . ?
C1 C2 H2 118.6 . . ?
N1 C3 C4 122.8(4) . . ?
N1 C3 H3 118.6 . . ?
C4 C3 H3 118.6 . . ?
C3 C4 C5 119.4(4) . . ?
C3 C4 H4 120.3 . . ?
C5 C4 H4 120.3 . . ?
C4 C5 C1 117.9(3) . . ?
C4 C5 C6 123.7(3) . . ?
C1 C5 C6 118.4(3) . . ?
N2 C6 C7 123.1(3) . . ?
N2 C6 C5 114.8(3) . . ?
C7 C6 C5 122.0(3) . . ?
C8 C7 C6 119.8(4) . . ?
C8 C7 H7 120.1 . . ?
C6 C7 H7 120.1 . . ?
C9 C8 C7 117.2(3) . . ?
C9 C8 C16 121.0(3) . . ?
C7 C8 C16 121.8(3) . . ?
C8 C9 C10 119.8(4) . . ?
C8 C9 H9 120.1 . . ?
C10 C9 H9 120.1 . . ?
N2 C10 C9 123.0(3) . . ?
N2 C10 C11 114.4(3) . . ?
C9 C10 C11 122.6(3) . . ?
C12 C11 C15 116.8(3) . . ?
C12 C11 C10 123.4(3) . . ?
C15 C11 C10 119.8(3) . . ?
C11 C12 C13 120.2(4) . . ?
C11 C12 H12 119.9 . . ?
C13 C12 H12 119.9 . . ?
N3 C13 C12 122.5(4) . . ?
N3 C13 H13 118.8 . . ?
C12 C13 H13 118.8 . . ?
N3 C14 C15 122.6(4) . . ?
N3 C14 H14 118.7 . . ?
C15 C14 H14 118.7 . . ?
C14 C15 C11 120.2(4) . . ?
C14 C15 H15 119.9 . . ?
C11 C15 H15 119.9 . . ?
C19 C16 C8 129.9(4) . . ?
C19 C16 S1 111.6(3) . . ?
C8 C16 S1 118.4(3) . . ?
C18 C17 S1 113.1(3) . . ?
C18 C17 H17 123.5 . . ?
S1 C17 H17 123.5 . . ?
C17 C18 C19 114.1(4) . . ?
C17 C18 H18 123.0 . . ?
C19 C18 H18 123.0 . . ?
C16 C19 C20 128.3(5) . . ?
C16 C19 C18 109.9(4) . . ?
C20 C19 C18 121.7(5) . . ?
C19 C20 H20A 109.5 . . ?
C19 C20 H20B 109.5 . . ?
H20A C20 H20B 109.5 . . ?
C19 C20 H20C 109.5 . . ?
H20A C20 H20C 109.5 . . ?
H20B C20 H20C 109.5 . . ?
C1A O1A Cu1 120.4(3) . . ?
C3A O2A Cu1 124.8(3) . . ?
O1A C1A C2A 128.4(4) . . ?
O1A C1A C4A 114.6(4) . . ?
C2A C1A C4A 117.0(4) . . ?
C3A C2A C1A 123.8(5) . . ?
C3A C2A H2A 118.1 . . ?
C1A C2A H2A 118.1 . . ?
O2A C3A C2A 129.5(4) . . ?
O2A C3A C5A 114.4(3) . . ?
C2A C3A C5A 116.1(4) . . ?
F4AC C4A F4AA 107.0(3) . . ?
F4AD C4A F4AE 106.8(3) . . ?
F4AC C4A F4AB 105.7(3) . . ?
F4AA C4A F4AB 105.4(3) . . ?
F4AD C4A F4AF 105.8(3) . . ?
F4AE C4A F4AF 105.4(3) . . ?
F4AC C4A C1A 113.0(3) . . ?
F4AD C4A C1A 113.5(3) . . ?
F4AA C4A C1A 113.6(3) . . ?
F4AE C4A C1A 113.1(3) . . ?
F4AB C4A C1A 111.4(3) . . ?
F4AF C4A C1A 111.6(3) . . ?
F5AA C5A F5AC 107.2(3) . . ?
F5AE C5A F5AD 106.3(3) . . ?
F5AE C5A F5AF 106.1(3) . . ?
F5AD C5A F5AF 105.3(3) . . ?
F5AA C5A F5AB 106.2(3) . . ?
F5AC C5A F5AB 104.3(3) . . ?
F5AA C5A C3A 113.4(3) . . ?
F5AE C5A C3A 113.7(3) . . ?
F5AC C5A C3A 113.0(3) . . ?
F5AD C5A C3A 112.6(3) . . ?
F5AF C5A C3A 112.2(3) . . ?
F5AB C5A C3A 112.0(3) . . ?
C1B O1B Cu1 127.1(3) . . ?
C3B O2B Cu1 121.5(3) . . ?
O1B C1B C2B 129.5(4) . . ?
O1B C1B C4B 111.6(3) . . ?
C2B C1B C4B 118.8(3) . . ?
C1B C2B C3B 124.1(4) . . ?
C1B C2B H2B 117.9 . . ?
C3B C2B H2B 117.9 . . ?
O2B C3B C2B 127.8(4) . . ?
O2B C3B C5B 114.0(3) . . ?
C2B C3B C5B 117.9(3) . . ?
F4BA C4B F4BE 133.3(5) . . ?
F4BA C4B F4BF 51.0(14) . . ?
F4BE C4B F4BF 106.1(3) . . ?
F4BA C4B F4BB 107.0(3) . . ?
F4BE C4B F4BB 56.8(14) . . ?
F4BF C4B F4BB 134.8(5) . . ?
F4BA C4B F4BD 58.1(14) . . ?
F4BE C4B F4BD 105.8(3) . . ?
F4BF C4B F4BD 105.7(3) . . ?
F4BB C4B F4BD 53.1(14) . . ?
F4BA C4B F4BC 105.6(3) . . ?
F4BE C4B F4BC 51.7(14) . . ?
F4BF C4B F4BC 58.6(14) . . ?
F4BB C4B F4BC 105.2(3) . . ?
F4BD C4B F4BC 134.6(5) . . ?
F4BA C4B C1B 113.5(3) . . ?
F4BE C4B C1B 113.1(3) . . ?
F4BF C4B C1B 112.9(3) . . ?
F4BB C4B C1B 112.2(3) . . ?
F4BD C4B C1B 112.5(3) . . ?
F4BC C4B C1B 112.7(3) . . ?
F5BD C5B F5BF 106.3(3) . . ?
F5BB C5B F5BC 106.5(3) . . ?
F5BB C5B F5BA 106.2(3) . . ?
F5BC C5B F5BA 105.6(3) . . ?
F5BD C5B F5BE 105.9(3) . . ?
F5BF C5B F5BE 106.0(3) . . ?
F5BB C5B C3B 113.2(3) . . ?
F5BD C5B C3B 112.7(3) . . ?
F5BF C5B C3B 112.9(3) . . ?
F5BC C5B C3B 112.9(3) . . ?
F5BA C5B C3B 111.9(3) . . ?
F5BE C5B C3B 112.5(3) . . ?
F4BF F4BA F4BD 121.3(5) . . ?
F4BF F4BA C4B 64.7(7) . . ?
F4BD F4BA C4B 61.3(7) . . ?
F4BE F4BB F4BD 119.7(5) . . ?
F4BE F4BB C4B 61.5(7) . . ?
F4BD F4BB C4B 63.6(7) . . ?
F4BE F4BC F4BF 118.8(5) . . ?
F4BE F4BC C4B 63.7(7) . . ?
F4BF F4BC C4B 60.4(7) . . ?
F4BB F4BD F4BA 118.6(5) . . ?
F4BB F4BD C4B 63.3(7) . . ?
F4BA F4BD C4B 60.6(7) . . ?
F4BB F4BE F4BC 121.6(5) . . ?
F4BB F4BE C4B 61.7(7) . . ?
F4BC F4BE C4B 64.6(7) . . ?
F4BA F4BF C4B 64.2(7) . . ?
F4BA F4BF F4BC 120.0(5) . . ?
C4B F4BF F4BC 61.1(7) . . ?
 
loop_
 _geom_hbond_atom_site_label_D 
 _geom_hbond_atom_site_label_H 
 _geom_hbond_atom_site_label_A 
 _geom_hbond_distance_DH 
 _geom_hbond_distance_HA 
 _geom_hbond_distance_DA 
 _geom_hbond_angle_DHA 
 _geom_hbond_site_symmetry_A 
C12 H12 F4BE  0.93 2.11 2.772(8) 127.1 2_746
C17 H17 F5AD  0.93 2.47 3.325(9) 153.4 1_645
 
_refine_diff_density_max    1.048
_refine_diff_density_min   -0.844
_refine_diff_density_rms    0.104

_shelxl_version_number 2014/6

_shelx_res_file
;
TITL p in P2(1)/n
CELL 0.71073  12.2430  15.6030  16.4746  90.000  90.734  90.000
ZERR   4.00   0.0024   0.0031   0.0033   0.000   0.030   0.000
LATT  1
SYMM 0.5-X, 0.5+Y, 0.5-Z
SFAC C H N O S F CU
UNIT 120 68 12 16 4 48 4

L.S. 30
BOND $H
ACTA 50.50
HTAB
FMAP 2
PLAN 20
SADI 0.003 C16 C18 C17 C19
SADI 0.003 C5 C6  C10 C11 C8 C16
SADI 0.003 N1 C2 N1 C3 N2 C6 N2 C10 N3 C13 N3 C14
DFIX  61  0.003 C4a F4aa C4a F4ab C4a F4ac  C4a F4ad C4a F4ae C4a F4af
DFIX  61  0.003 C4b F4ba C4b F4bb C4b F4bc  C4b F4bd C4b F4be C4b F4bf
DFIX  61  0.003 C5a F5aa C5a F5ab C5a F5ac  C5a F5ad C5a F5ae C5a F5af
DFIX  61  0.003 C5b F5ba C5b F5bb C5b F5bc  C5b F5bd C5b F5be C5b F5bf
DFIX  71  0.003 F4aa F4ab F4ab F4ac F4ac F4aa
DFIX  71  0.003 F4ad F4ae F4ae F4af F4af F4ad
DFIX  71  0.003 F5aa F5ab F5ab F5ac F5ac F5aa
DFIX  71  0.003 F5ad F5ae F5ae F5af F5af F5ad
DFIX  71  0.003 F4ba F4bb F4bb F4bc F4bc F4ba
DFIX  71  0.003 F5ba F5bb F5bb F5bc F5bc F5ba
DFIX  71  0.003 F4bd F4be F4be F4bf F4bf F4bd
DFIX  71  0.003 F5bd F5be F5be F5bf F5bf F5bd
DFIX  81  0.003  C1a F4aa C1a F4ab C1a F4ac  C1a F4ad C1a F4ae C1a F4af
DFIX  81  0.003  C3a F5aa C3a F5ab C3a F5ac  C3a F5ad C3a F5ae C3a F5af
DFIX  81  0.003  C1b F4ba C1b F4bb C1b F4bc  C1b F4bd C1b F4be C1b F4bf
DFIX  81  0.003  C3b F5ba C3b F5bb C3b F5bc  C3b F5bd C3b F5be C3b F5bf
DFIX 91 0.003 C11 C12 C12 C13 C14 C15 C15 C11
DFIX 91 0.003 C1 C2 C3 C4 C4 C5 C5 C1    C6 C7 C7 C8 C8 C9 C9 C10

RIGU 0.0001

REM Instructions for potential hydrogen bonds
EQIV $1 -x+5/2, y-1/2, -z+3/2
HTAB C12 F4BE_$1
EQIV $2 x+1, y-1, z
HTAB C17 F5AD_$2

WGHT    0.117600    3.989900
FVAR       0.16963   0.64313   0.82066   0.89324   0.92696   1.31276   2.09652
FVAR       2.35573   1.38224   0.11019
CU1   7    0.753673    0.886674    0.882861    11.00000    0.03188    0.02662 =
         0.04346   -0.00234    0.00058    0.00066
S1    5    1.366650    0.358564    0.911834    11.00000    0.05545    0.03863 =
         0.09043    0.00415   -0.00242    0.00870
N1    3    0.876454    0.800312    0.885798    11.00000    0.03170    0.02662 =
         0.04363   -0.00364   -0.00047    0.00046
N2    3    1.254076    0.686735    0.887106    11.00000    0.03336    0.02934 =
         0.04317   -0.00242   -0.00086    0.00158
N3    3    1.631411    0.800777    0.887631    11.00000    0.03046    0.02959 =
         0.04241   -0.00507    0.00029    0.00052
C1    1    1.056983    0.768743    0.841615    11.00000    0.03287    0.03032 =
         0.05126    0.00185    0.00282    0.00234
AFIX  43
H1    2    1.116706    0.784194    0.810513    11.00000   -1.20000
AFIX   0
C2    1    0.963925    0.818664    0.841194    11.00000    0.03313    0.03089 =
         0.04971    0.00126    0.00243    0.00270
AFIX  43
H2    2    0.961948    0.867207    0.808451    11.00000   -1.20000
AFIX   0
C3    1    0.880082    0.729537    0.931463    11.00000    0.03356    0.02995 =
         0.05033    0.00106    0.00272    0.00261
AFIX  43
H3    2    0.820023    0.716245    0.963085    11.00000   -1.20000
AFIX   0
C4    1    0.969117    0.675370    0.933683    11.00000    0.03328    0.02951 =
         0.04821    0.00030    0.00218    0.00225
AFIX  43
H4    2    0.967769    0.625824    0.965036    11.00000   -1.20000
AFIX   0
C5    1    1.060404    0.695388    0.888877    11.00000    0.03165    0.02523 =
         0.04066   -0.00547   -0.00127   -0.00038
C6    1    1.160687    0.642367    0.888115    11.00000    0.03320    0.02856 =
         0.03684   -0.00373   -0.00022    0.00199
C7    1    1.156853    0.553795    0.885425    11.00000    0.03355    0.02848 =
         0.04858   -0.00404   -0.00185    0.00212
AFIX  43
H7    2    1.090079    0.525544    0.887746    11.00000   -1.20000
AFIX   0
C8    1    1.252626    0.507413    0.879273    11.00000    0.03433    0.02810 =
         0.03850    0.00298    0.00145    0.00280
C9    1    1.349266    0.553210    0.878146    11.00000    0.03508    0.02976 =
         0.04947   -0.00158    0.00451    0.00168
AFIX  43
H9    2    1.415608    0.524644    0.873836    11.00000   -1.20000
AFIX   0
C10   1    1.346943    0.641732    0.883455    11.00000    0.03360    0.02975 =
         0.03990   -0.00108   -0.00025    0.00193
C11   1    1.447419    0.694553    0.885250    11.00000    0.03419    0.03108 =
         0.03846    0.00039   -0.00122    0.00106
C12   1    1.540459    0.673889    0.842902    11.00000    0.03476    0.03614 =
         0.04755   -0.00919    0.00174   -0.00347
AFIX  43
H12   2    1.542961    0.623391    0.812995    11.00000   -1.20000
AFIX   0
C13   1    1.629834    0.728000    0.844826    11.00000    0.03293    0.03319 =
         0.05164   -0.01083    0.00295   -0.00115
AFIX  43
H13   2    1.691196    0.713217    0.815219    11.00000   -1.20000
AFIX   0
C14   1    1.542157    0.820871    0.929438    11.00000    0.03304    0.03495 =
         0.05198   -0.00985    0.00502   -0.00099
AFIX  43
H14   2    1.542116    0.871194    0.959688    11.00000   -1.20000
AFIX   0
C15   1    1.450062    0.769895    0.929488    11.00000    0.03396    0.03688 =
         0.05319   -0.00885    0.00433   -0.00233
AFIX  43
H15   2    1.389577    0.786241    0.959358    11.00000   -1.20000
AFIX   0
C16   1    1.252680    0.412850    0.875629    11.00000    0.04542    0.02797 =
         0.05135    0.00250    0.01271    0.00250
C17   1    1.311812    0.262711    0.883653    11.00000    0.06386    0.04340 =
         0.08202    0.00010    0.01253    0.00046
AFIX  43
H17   2    1.347066    0.210507    0.891468    11.00000   -1.20000
AFIX   0
C18   1    1.213863    0.270060    0.849478    11.00000    0.06258    0.03816 =
         0.07832    0.00529    0.01471   -0.00249
AFIX  43
H18   2    1.173687    0.223233    0.830971    11.00000   -1.20000
AFIX   0
C19   1    1.174962    0.356950    0.843467    11.00000    0.05364    0.03683 =
         0.05258    0.00257    0.01197   -0.00584
C20   1    1.072255    0.377271    0.805453    11.00000    0.06626    0.04550 =
         0.09256   -0.00749   -0.01011    0.00123
AFIX  33
H20A  2    1.036109    0.325298    0.789257    11.00000   -1.50000
H20B  2    1.027414    0.407803    0.843093    11.00000   -1.50000
H20C  2    1.084439    0.412323    0.758542    11.00000   -1.50000
AFIX   0
O1A   4    0.753921    0.882749    0.744702    11.00000    0.06603    0.05305 =
         0.04347   -0.00303    0.00099    0.00586
O2A   4    0.644016    0.981312    0.867782    11.00000    0.04312    0.03705 =
         0.04991    0.00232    0.00451    0.01127
C1A   1    0.728451    0.946953    0.704833    11.00000    0.05009    0.05177 =
         0.04469   -0.00246    0.00007    0.00041
C2A   1    0.677406    1.020389    0.730973    11.00000    0.05579    0.05291 =
         0.05064   -0.00285    0.00341    0.00228
AFIX  43
H2A   2    0.667403    1.064760    0.693926    11.00000   -1.20000
AFIX   0
C3A   1    0.640645    1.031871    0.808038    11.00000    0.03948    0.03367 =
         0.04812   -0.00013   -0.00252    0.00246
C4A   1    0.758403    0.942829    0.615984    11.00000    0.12792    0.09236 =
         0.04981   -0.00112    0.01999    0.01234
C5A   1    0.583909    1.115977    0.824546    11.00000    0.06845    0.04079 =
         0.07811   -0.00092    0.00809    0.01567
O1B   4    0.864519    0.980086    0.878929    11.00000    0.04019    0.03382 =
         0.04809   -0.00287    0.00150   -0.00695
O2B   4    0.744690    0.915791    1.016916    11.00000    0.05912    0.03129 =
         0.04395   -0.00385    0.00394   -0.00792
C1B   1    0.878132    1.039539    0.929377    11.00000    0.04249    0.02988 =
         0.04368    0.00135   -0.00017   -0.00588
C2B   1    0.839970    1.047088    1.006141    11.00000    0.06109    0.03799 =
         0.04697   -0.00229    0.00755   -0.01338
AFIX  43
H2B   2    0.856116    1.097077    1.034601    11.00000   -1.20000
AFIX   0
C3B   1    0.777945    0.984420    1.045045    11.00000    0.05051    0.03069 =
         0.04269   -0.00434    0.00652   -0.00576
C4B   1    0.941667    1.113191    0.893641    11.00000    0.06673    0.04246 =
         0.06333    0.00775    0.00552   -0.01954
C5B   1    0.736342    1.004207    1.129196    11.00000    0.10462    0.04008 =
         0.05016   -0.00504    0.02609   -0.00173

PART 1
F4AA  6    0.719132    1.006325    0.572853    21.00000    0.23921    0.12371 =
         0.05292    0.00434    0.02661    0.07000
F4AB  6    0.865514    0.946020    0.606437    21.00000    0.12910    0.21469 =
         0.10527   -0.00219    0.02750    0.00755
F4AC  6    0.726467    0.872157    0.580715    21.00000    0.21171    0.10344 =
         0.06486   -0.00602    0.01112   -0.01215
PART 2
F4AD  6    0.814545    1.008860    0.591646   -21.00000  101.00000
F4AE  6    0.815134    0.874464    0.597675   -21.00000  101.00000
F4AF  6    0.670614    0.939904    0.568483   -21.00000  101.00000
PART 1
F5AA  6    0.571310    1.131530    0.901386    31.00000    0.25358    0.08338 =
         0.07860    0.00229    0.01668    0.10090
F5AB  6    0.485151    1.118917    0.791140    31.00000    0.07458    0.08751 =
         0.10972    0.00234   -0.00574    0.01613
F5AC  6    0.634977    1.182348    0.793418    31.00000    0.09748    0.05404 =
         0.13427    0.01573    0.02695    0.00749
PART 2
F5AD  6    0.494993    1.106505    0.867592   -31.00000  101.00000
F5AE  6    0.554483    1.157223    0.758841   -31.00000  101.00000
F5AF  6    0.646131    1.169239    0.866664   -31.00000  101.00000
PART 2
F4BA  6    0.987764    1.162457    0.948329    41.00000    0.16152    0.11961 =
         0.06955   -0.00801    0.01733   -0.10148
F4BB  6    0.880139    1.162581    0.847524    41.00000    0.08214    0.07896 =
         0.10182    0.03805   -0.00188   -0.01203
F4BC  6    1.021594    1.087326    0.846400    41.00000    0.07980    0.07839 =
         0.08089    0.00174    0.01709   -0.00988
PART 2
F4BD  6    0.900597    1.188328    0.912982   -41.00000  101.00000
F4BE  6    0.943928    1.111520    0.814099   -41.00000  101.00000
F4BF  6    1.043950    1.115040    0.918342   -41.00000  101.00000
PART 1
F5BA  6    0.635574    1.033942    1.127014    51.00000    0.11839    0.13874 =
         0.09598    0.01764    0.03398    0.03518
F5BB  6    0.795047    1.061775    1.167588    51.00000    0.19405    0.12898 =
         0.06284   -0.03338    0.05069   -0.08950
F5BC  6    0.733585    0.936565    1.176293    51.00000    0.09652    0.04648 =
         0.06047    0.00309    0.01689   -0.00817
PART 2
F5BD  6    0.691940    1.080495    1.134175   -51.00000  101.00000
F5BE  6    0.814437    1.002473    1.184689   -51.00000  101.00000
F5BF  6    0.662141    0.949706    1.153437   -51.00000  101.00000
HKLF 4

REM  p in P2(1)/n
REM R1 =  0.0771 for    4563 Fo > 4sig(Fo)  and  0.1540 for all    8884 data
REM    505 parameters refined using    544 restraints

END

WGHT      0.1260      3.0201

REM Instructions for potential hydrogen bonds
HTAB C12 F4BE_$1
HTAB C17 F5AD_$2
EQIV $3 -x+2, -y+1, -z+2
HTAB C17 F5BF_$3

REM Highest difference peak  1.048,  deepest hole -0.844,  1-sigma level  0.104
Q1    1   0.6595  1.1518  0.8935  11.00000  0.05    1.05
Q2    1   0.5123  1.1019  0.9035  11.00000  0.05    0.81
Q3    1   1.0151  1.1378  0.9581  11.00000  0.05    0.80
Q4    1   0.7738  0.8767  0.5771  11.00000  0.05    0.71
Q5    1   0.7593  1.0328  0.5828  11.00000  0.05    0.70
Q6    1   0.8514  1.0412  1.1730  11.00000  0.05    0.70
Q7    1   0.6069  1.0154  1.1072  11.00000  0.05    0.67
Q8    1   0.7329  1.0826  1.1433  11.00000  0.05    0.66
Q9    1   0.8845  1.1961  0.9415  11.00000  0.05    0.66
Q10   1   0.6191  0.9571  0.5755  11.00000  0.05    0.65
Q11   1   0.8532  1.1447  0.8263  11.00000  0.05    0.64
Q12   1   0.5332  1.1615  0.7977  11.00000  0.05    0.63
Q13   1   0.6280  1.1808  0.7634  11.00000  0.05    0.61
Q14   1   0.6625  0.8980  0.5787  11.00000  0.05    0.58
Q15   1   0.8634  0.9871  0.6062  11.00000  0.05    0.57
Q16   1   0.7415  0.9813  1.1772  11.00000  0.05    0.55
Q17   1   1.1251  0.3683  0.8289  11.00000  0.05    0.54
Q18   1   0.4902  1.1159  0.7622  11.00000  0.05    0.52
Q19   1   1.0174  1.1166  0.8773  11.00000  0.05    0.47
Q20   1   0.4988  1.1273  0.8417  11.00000  0.05    0.44
;
_shelx_res_checksum   12110

_shelx_hkl_file
;
   2   0   0 1849.56  121.02   2
   2   0   0 1682.50  116.05   4
   2   0   0 1909.98  170.16   6
  -2   0   0 1826.16  114.44   5
  -2   0   0 1885.91  112.88   3
   3   0   0 1.12502 0.76430   2
  -3   0   0 0.22591 0.52782   5
   3   0   0 -0.1449  0.4837   4
  -3   0   0 0.25219 0.40182   1
  -3   0   0 0.03051 0.47371   3
  -4   0   0 85.6683  5.8305   3
  -4   0   0 79.1136  5.7411   1
   4   0   0 74.5817  6.0381   2
  -4   0   0 87.1274  5.9157   5
   4   0   0 77.3544  5.8527   4
  -5   0   0 -0.7745  0.6463   3
  -5   0   0 0.17095 0.75128   5
   5   0   0 -0.5299  0.9550   2
   5   0   0 -1.4999  0.5452   4
   6   0   0 97.8311  7.5216   2
  -6   0   0 96.3505  7.0942   3
   6   0   0 91.8010  7.1296   4
   6   0   0 110.956  11.045   6
  -6   0   0 85.6920  7.0754   5
  -7   0   0 0.07502 1.17035   3
   7   0   0 -0.6003  2.3503   6
   7   0   0 -0.1001  1.0466   4
  -7   0   0 -1.0085  0.9089   5
   7   0   0 -1.1207  1.0987   2
  -8   0   0 798.010  50.701   3
  -8   0   0 761.272  51.335   5
   8   0   0 826.232  52.056   4
   8   0   0 813.480  54.191   2
   8   0   0 791.143  75.986   6
  -9   0   0 -0.9526  1.3916   3
   9   0   0 -1.3326  3.0717   6
   9   0   0 -0.8906  1.5655   2
   9   0   0 1.99639 1.64133   4
  -9   0   0 1.25738 1.38419   5
 -10   0   0 589.701  38.135   5
 -10   0   0 609.671  37.710   3
  10   0   0 623.674  40.251   2
  10   0   0 530.682  38.302   4
  10   0   0 540.594  55.969   6
  11   0   0 -0.8069  2.3126   2
 -11   0   0 0.48673 2.00113   3
  11   0   0 -0.4469  1.8129   4
  11   0   0 -5.5237  3.0912   6
 -11   0   0 -2.6733  1.4227   5
  12   0   0 0.80429 1.92537   4
 -12   0   0 -0.3588  1.7527   5
  12   0   0 4.40627 3.01667   2
 -12   0   0 1.26311 2.03110   3
 -13   0   0 -1.5021  1.9287   3
  13   0   0 -2.2475  2.1171   4
  13   0   0 -2.3597  2.3597   2
 -13   0   0 1.15829 2.54032   5
 -14   0   0 11.7401  3.9644   5
 -14   0   0 11.5693  3.6527   3
  14   0   0 16.5105  4.4602   2
  14   0   0 25.1507  4.6572   4
  15   0   0 1.48020 2.92678   4
 -15   0   0 2.40579 2.91538   5
 -15   0   0 3.07396 2.78355   3
 -16   0   0 18.3107  4.7230   5
 -16   0   0 19.9920  5.2166   3
  -4  -1   0 3.24038 1.04195   3
   4  -1   0 4.91899 1.16011   4
  -4  -1   0 4.55578 1.11554   5
   4  -1   0 8.11990 1.40050   2
   4  -1   0 3.16993 1.34144   6
  -4  -1   0 5.12138 0.91410   1
   4   1   0 3.53337 1.12655   2
   4   1   0 5.00990 1.17401   4
  -4   1   0 6.01860 1.21798   3
  -4   1   0 6.19504 1.20477   5
  -4   1   0 5.30272 1.10848   1
   5  -1   0 5.75830 1.71774   6
  -5  -1   0 4.50790 1.01939   1
   5  -1   0 6.54659 1.45535   4
  -5  -1   0 9.13761 1.69562   5
   5  -1   0 6.52510 1.50344   2
  -5  -1   0 7.29977 1.43308   3
  -5   1   0 4.72390 1.31980   5
   5   1   0 5.37180 1.35911   4
   5   1   0 5.75605 1.39278   2
  -5   1   0 8.59888 1.50643   3
   5   1   0 7.73548 2.87892   6
   6  -1   0 23.7228  2.9561   2
   6  -1   0 20.8651  2.8054   4
   6  -1   0 17.4705  3.5724   6
  -6  -1   0 24.7532  2.9516   3
  -6  -1   0 21.7845  2.9017   5
  -6   1   0 22.2896  2.9575   5
   6   1   0 22.5141  2.9071   4
  -6   1   0 21.4322  2.7618   3
   6   1   0 21.0993  2.9278   2
   6   1   0 18.9158  4.0766   6
   7  -1   0 5.62044 1.81762   2
  -7  -1   0 9.83018 2.12914   3
   7  -1   0 4.54204 1.57443   4
   7  -1   0 5.04910 2.74091   6
  -7  -1   0 3.66331 1.45764   5
   7   1   0 6.75779 1.73204   4
  -7   1   0 4.93501 1.65768   5
   7   1   0 5.67891 1.94557   2
  -7   1   0 4.96109 1.69222   3
   7   1   0 4.16986 2.83504   6
  -8  -1   0 3.11825 1.68881   3
   8  -1   0 2.90267 1.81674   2
   8  -1   0 2.27547 3.02043   6
  -8  -1   0 6.10947 2.10542   5
   8  -1   0 3.54196 1.61683   4
   8   1   0 1.19891 2.03258   2
  -8   1   0 4.12263 1.66343   3
  -8   1   0 3.88835 1.87891   5
   8   1   0 4.99025 1.79245   4
   8   1   0 3.47572 3.26890   6
   9  -1   0 12.1406  2.9032   2
  -9  -1   0 8.26589 2.57446   3
   9  -1   0 12.0685  4.5692   6
  -9  -1   0 15.1513  2.8678   5
   9  -1   0 14.3435  2.7926   4
   9   1   0 11.8519  4.1106   6
  -9   1   0 10.5545  2.7053   3
  -9   1   0 9.85299 2.45134   5
   9   1   0 17.0510  3.0553   4
   9   1   0 10.5386  2.7724   2
  10  -1   0 -5.5166  3.4523   6
  10  -1   0 -0.9519  2.3770   2
 -10  -1   0 1.73322 1.76264   3
  10  -1   0 2.47252 1.98507   4
 -10  -1   0 -0.8208  1.7271   5
  10   1   0 -3.7218  3.2445   6
  10   1   0 -2.1012  2.3176   2
 -10   1   0 -0.0498  1.6345   3
  10   1   0 -0.7877  2.0058   4
 -10   1   0 0.79901 1.69153   5
 -11  -1   0 19.0600  3.5943   3
  11  -1   0 15.6223  3.8247   2
  11  -1   0 15.3119  3.4008   4
 -11  -1   0 15.7271  3.6712   5
  11  -1   0 8.54909 4.88429   6
  11   1   0 12.2542  3.4730   2
  11   1   0 23.7188  4.0294   4
 -11   1   0 14.5723  3.4501   5
 -11   1   0 16.1682  3.3999   3
  11   1   0 16.1383  5.0095   6
  12  -1   0 -6.9475  3.2702   6
 -12  -1   0 3.21980 2.40145   3
  12  -1   0 0.52166 2.35176   4
  12  -1   0 0.53467 2.63470   2
 -12  -1   0 0.94293 1.93412   5
  12   1   0 -0.9851  1.9303   4
  12   1   0 1.57483 2.42953   2
 -12   1   0 2.20313 2.48871   5
 -12   1   0 -1.8605  1.6438   3
 -13  -1   0 -2.3556  2.3205   5
  13  -1   0 1.24928 2.87815   2
  13  -1   0 -0.4238  2.3355   4
 -13  -1   0 2.26327 2.34783   3
 -13   1   0 -1.6179  2.3004   5
  13   1   0 -0.6017  2.2979   4
  13   1   0 0.89516 2.54338   2
 -13   1   0 1.38811 2.38143   3
 -14  -1   0 6.78958 3.39964   5
  14  -1   0 8.90614 3.43067   4
  14  -1   0 0.52202 2.78242   2
 -14  -1   0 0.54405 2.28102   3
 -14   1   0 5.75281 3.29123   5
  14   1   0 3.30406 3.07187   2
  14   1   0 7.10627 3.34506   4
 -14   1   0 12.7754  3.3370   3
 -15  -1   0 -0.2994  2.4206   5
 -15  -1   0 4.80599 3.46418   3
  15  -1   0 2.00070 2.66386   4
 -15   1   0 -0.4928  2.4256   3
 -15   1   0 0.60652 2.82884   5
  15   1   0 1.28145 2.96750   4
 -16  -1   0 0.97326 3.01964   3
 -16  -1   0 5.30880 3.71090   5
 -16   1   0 3.82979 3.47039   5
 -16   1   0 5.93504 3.44705   3
  16   1   0 7.99742 3.66921   4
   1  -2   0 542.033  34.848   4
   1  -2   0 505.959  51.209   6
   1  -2   0 544.375  36.418   2
   1   2   0 549.233  36.336   2
  -1   2   0 569.078  36.425   2
   1   2   0 563.977  34.925   4
   2  -2   0 1979.18  123.25   4
   2  -2   0 1842.43  128.59   2
  -2  -2   0 1832.26  121.44   5
   2  -2   0 1787.28  180.81   6
  -2  -2   0 1829.74  119.74   3
  -2   2   0 1960.40  128.63   2
  -2   2   0 1931.81  119.78   3
  -2   2   0 1890.90  121.44   5
  -2   2   0 2182.94  180.93   6
   2   2   0 2029.37  123.36   4
   2   2   0 2199.57  180.70   6
   2   2   0 1839.13  128.49   2
   3  -2   0 1945.83  127.33   2
  -3  -2   0 1949.30  120.32   5
  -3  -2   0 1938.56  118.64   3
   3  -2   0 1727.61  178.94   6
   3  -2   0 2032.22  122.06   4
  -3   2   0 1914.05  118.64   3
   3   2   0 2032.82  178.85   6
  -3   2   0 1885.28  179.04   6
   3   2   0 1804.01  127.19   2
   3   2   0 1945.66  122.13   4
  -3   2   0 2030.75  127.42   2
  -3   2   0 1851.08  120.28   5
  -4  -2   0 46.4167  3.0639   1
   4  -2   0 38.3637  4.9319   6
  -4  -2   0 39.1226  3.3356   3
   4  -2   0 45.4907  3.7093   2
  -4  -2   0 43.7715  3.4643   5
   4  -2   0 40.6217  3.3991   4
  -4   2   0 39.1232  3.3654   5
  -4   2   0 46.4204  6.4951   6
   4   2   0 40.1224  3.5338   2
   4   2   0 54.7504  6.2907   6
  -4   2   0 41.4773  3.3686   3
   4   2   0 34.2875  3.3681   4
   5  -2   0 526.606  53.981   6
  -5  -2   0 554.795  36.589   1
   5  -2   0 601.620  38.539   2
  -5  -2   0 578.707  35.974   3
  -5  -2   0 586.895  36.514   5
   5  -2   0 492.570  36.745   4
   5   2   0 576.325  53.983   6
   5   2   0 571.283  38.400   2
  -5   2   0 570.476  35.946   3
  -5   2   0 600.061  36.502   5
   5   2   0 607.870  37.058   4
  -6  -2   0 1.50575 1.15179   3
   6  -2   0 -0.0144  0.8716   4
   6  -2   0 -0.8077  0.9465   6
  -6  -2   0 0.06552 0.93278   5
   6  -2   0 0.26052 0.95066   2
  -6   2   0 2.96355 1.30376   5
   6   2   0 0.50230 2.47634   6
   6   2   0 -0.2647  0.9356   4
   6   2   0 0.77395 1.04131   2
  -6   2   0 0.14951 0.94587   3
  -7  -2   0 112.484   8.142   3
  -7  -2   0 107.919   8.228   5
   7  -2   0 102.929  11.845   6
   7  -2   0 115.498   8.695   2
   7  -2   0 95.7420  8.0760   4
   7   2   0 111.156  12.230   6
   7   2   0 117.609   8.636   2
  -7   2   0 114.445   8.275   5
  -7   2   0 108.220   8.103   3
   7   2   0 106.481   8.273   4
   8  -2   0 72.1875  8.8647   6
  -8  -2   0 80.5835  6.3100   5
   8  -2   0 57.0198  6.1222   2
   8  -2   0 74.8884  6.1282   4
  -8  -2   0 71.2557  5.9982   3
   8   2   0 63.7609  5.9860   4
  -8   2   0 76.7581  6.1922   5
  -8   2   0 73.6222  6.0620   3
   8   2   0 78.2400  6.5079   2
   8   2   0 77.0518  9.6709   6
   9  -2   0 177.920  12.856   4
  -9  -2   0 177.579  12.904   5
   9  -2   0 169.556  19.063   6
  -9  -2   0 175.193  12.680   3
   9  -2   0 194.284  13.671   2
   9   2   0 163.889  13.348   2
  -9   2   0 168.243  12.863   5
   9   2   0 181.696  13.063   4
  -9   2   0 173.096  12.676   3
   9   2   0 180.076  18.889   6
  10  -2   0 1.19168 3.90850   6
  10  -2   0 5.34383 2.64943   2
 -10  -2   0 11.7463  2.9666   3
 -10  -2   0 3.13167 2.13053   5
  10  -2   0 3.08979 2.08255   4
  10   2   0 5.17176 2.71509   2
  10   2   0 2.67003 3.73224   6
 -10   2   0 5.66449 2.30193   5
  10   2   0 9.43277 2.61764   4
 -10   2   0 2.71239 1.93277   3
  11  -2   0 83.3682  8.3597   4
 -11  -2   0 77.4673  7.9205   3
 -11  -2   0 84.9485  8.5645   5
  11  -2   0 75.1932  8.2831   2
  11  -2   0 62.7148 10.9375   6
 -11   2   0 70.9551  7.8302   5
 -11   2   0 80.8164  8.1409   3
  11   2   0 74.9607 10.7420   6
  11   2   0 72.3237  7.9800   4
  11   2   0 86.8400  7.6612   2
  12  -2   0 34.2900  5.7028   2
 -12  -2   0 43.8036  5.7989   3
  12  -2   0 43.2074  5.9318   4
  12  -2   0 22.7745  7.2328   6
 -12  -2   0 30.5026  5.0952   5
 -12   2   0 29.7915  4.9801   5
 -12   2   0 39.9095  5.5959   3
  12   2   0 42.1637  5.6848   4
  12   2   0 45.9185  6.1442   2
  13  -2   0 59.8490  7.3140   4
 -13  -2   0 37.8825  5.9457   3
 -13  -2   0 63.5085  7.4850   5
  13  -2   0 57.8394  7.5541   2
 -13   2   0 34.4428  5.8082   3
  13   2   0 58.3049  7.2689   4
  13   2   0 51.9435  6.8994   2
 -13   2   0 40.9275  6.1300   5
 -14  -2   0 2.68846 2.54305   5
  14  -2   0 -0.7510  3.1068   2
 -14  -2   0 -1.2984  2.6146   3
  14  -2   0 -1.1559  2.2972   4
 -14   2   0 3.35339 2.75330   5
  14   2   0 1.27953 2.73572   4
 -14   2   0 0.52287 2.35819   3
 -15  -2   0 5.04342 3.44089   5
  15  -2   0 10.9141  3.9439   4
 -15  -2   0 4.94338 3.03013   3
  15   2   0 6.47043 3.62658   4
 -15   2   0 1.76990 2.68523   3
 -15   2   0 6.23401 3.12444   5
 -16  -2   0 0.58627 2.92050   5
 -16  -2   0 2.02469 3.57216   3
  16   2   0 1.76695 3.31935   4
 -16   2   0 1.22585 3.36331   5
 -16   2   0 5.70083 3.35133   3
  -3  -3   0 22.0562  2.1613   5
   3  -3   0 13.6650  2.7529   6
  -3  -3   0 17.9132  1.9685   3
   3  -3   0 16.1757  2.1879   2
   3  -3   0 21.6541  2.2584   4
   3   3   0 19.5213  3.8892   6
  -3   3   0 16.9420  1.9691   3
   3   3   0 16.6330  2.1666   4
  -3   3   0 21.4726  4.8373   6
  -3   3   0 19.1413  2.0446   5
  -3   3   0 18.3965  2.3119   2
   3   3   0 21.3636  2.2560   2
   4  -3   0 31.7853  3.4262   2
   4  -3   0 27.2973  4.3751   6
   4  -3   0 34.6630  2.9510   4
  -4  -3   0 30.5869  2.8021   5
  -4  -3   0 33.6444  3.1922   3
  -4   3   0 29.7946  2.7363   3
   4   3   0 40.0480  3.1158   4
   4   3   0 31.6582  4.8100   6
  -4   3   0 34.0237  5.7101   6
   4   3   0 29.3993  2.9067   2
  -4   3   0 35.0830  2.8835   5
  -4   3   0 29.7287  3.3767   2
  -5  -3   0 1.28038 0.96802   5
  -5  -3   0 1.35233 0.57261   1
   5  -3   0 0.89026 1.10567   6
  -5  -3   0 1.60743 1.08121   3
   5  -3   0 1.60461 1.07590   4
   5  -3   0 1.42458 1.15576   2
  -5   3   0 4.21189 3.48105   6
   5   3   0 0.81043 1.04175   2
  -5   3   0 2.51829 0.97398   3
  -5   3   0 2.87234 1.14874   5
   5   3   0 0.46214 0.85251   4
   5   3   0 0.01870 2.33414   6
   6  -3   0 -0.6239  0.9736   2
  -6  -3   0 0.78027 1.24763   5
   6  -3   0 0.10136 1.08107   6
   6  -3   0 1.64310 1.26139   4
  -6  -3   0 4.20763 1.26021   3
   6   3   0 -0.1835  1.0551   2
  -6   3   0 1.69644 1.10049   3
  -6   3   0 -1.2733  2.5441   6
  -6   3   0 1.79951 1.09527   5
   6   3   0 2.64980 2.50037   6
   6   3   0 0.77041 0.92898   4
   7  -3   0 14.3022  2.6843   2
  -7  -3   0 12.5926  2.3747   5
  -7  -3   0 10.6781  2.1885   3
   7  -3   0 11.4215  2.2934   4
   7  -3   0 11.9939  3.0691   6
  -7   3   0 12.7060  2.4127   5
   7   3   0 11.9063  2.3105   4
   7   3   0 10.6564  3.4778   6
   7   3   0 10.6016  2.3143   2
  -7   3   0 7.19737 1.86965   3
   8  -3   0 2.34571 1.58687   4
  -8  -3   0 1.19881 1.37037   5
   8  -3   0 0.59374 1.66673   6
  -8  -3   0 0.63662 1.23801   3
   8  -3   0 -0.5744  1.4895   2
  -8   3   0 2.30810 1.48266   5
   8   3   0 -2.8177  2.4870   6
  -8   3   0 3.64215 1.78320   3
   8   3   0 0.40157 1.53987   2
   8   3   0 -0.1987  1.0740   4
   9  -3   0 5.72959 2.20529   4
   9  -3   0 2.92693 2.26647   6
  -9  -3   0 3.64547 1.79897   5
   9  -3   0 3.37116 1.98019   2
  -9  -3   0 2.92191 1.95406   3
   9   3   0 5.66066 2.04283   4
  -9   3   0 5.04566 2.05484   5
  -9   3   0 6.12709 2.16285   3
   9   3   0 1.84648 3.09497   6
   9   3   0 4.05791 2.15993   2
 -10  -3   0 -0.1009  2.0015   3
  10  -3   0 2.99194 2.08136   2
 -10  -3   0 2.73487 2.12615   5
  10  -3   0 6.70202 2.36668   4
  10  -3   0 -0.3824  2.2867   6
 -10   3   0 2.60252 1.69875   5
  10   3   0 3.91532 2.28303   2
  10   3   0 0.90687 1.72997   4
 -10   3   0 3.98312 2.17801   3
  10   3   0 0.68547 3.10618   6
  11  -3   0 15.0038  3.3732   4
  11  -3   0 14.6454  3.5278   2
  11  -3   0 -3.9853  4.0274   6
 -11  -3   0 26.3513  4.3551   5
 -11  -3   0 14.7401  3.3007   3
  11   3   0 13.2130  3.4202   4
  11   3   0 17.4077  3.5585   2
 -11   3   0 15.1636  3.2847   5
 -11   3   0 9.63809 2.85966   3
 -12  -3   0 2.90823 2.25202   3
  12  -3   0 2.43795 2.34509   4
  12  -3   0 1.37848 2.81636   2
  12  -3   0 -11.915   3.737   6
 -12  -3   0 4.80344 2.48284   5
  12   3   0 0.86028 2.00772   4
 -12   3   0 0.15636 1.85815   3
  12   3   0 1.82260 2.45827   2
 -12   3   0 0.83574 2.04918   5
 -13  -3   0 -3.4175  2.4785   3
 -13  -3   0 4.02369 2.63905   5
  13  -3   0 0.91343 2.83985   2
  13  -3   0 -0.5133  2.3509   4
 -13   3   0 -1.5226  1.8326   5
 -13   3   0 -0.2345  1.9650   3
  13   3   0 0.55396 2.66101   2
  13   3   0 3.24958 2.86315   4
 -14  -3   0 -1.5385  2.1946   3
 -14  -3   0 2.54433 2.85142   5
  14  -3   0 1.06464 3.39206   2
  14  -3   0 -0.3462  2.1661   4
 -14   3   0 0.78152 2.66252   3
  14   3   0 3.65482 2.67908   4
 -14   3   0 1.29770 2.37049   5
  15  -3   0 1.12847 3.68453   2
 -15  -3   0 -3.1463  2.6059   3
 -15  -3   0 -0.6686  2.6512   5
  15   3   0 -0.9976  2.7870   4
 -15   3   0 -1.0432  2.7091   5
 -15   3   0 5.21980 2.71180   3
 -16  -3   0 -2.8574  3.0499   5
 -16  -3   0 -3.7062  2.9612   3
 -16   3   0 -1.7516  2.6496   5
 -16   3   0 -0.2117  2.4396   3
  16   3   0 -0.7816  3.4700   4
   0  -4   0 543.891  32.764   4
   0   4   0 504.792  31.847   5
   0   4   0 506.449  34.029   2
   0   4   0 473.531  31.388   3
  -1  -4   0 351.960  22.110   5
  -1  -4   0 355.693  21.812   3
   1  -4   0 348.616  22.630   4
  -1   4   0 349.887  22.069   5
  -1   4   0 321.259  23.635   2
   1   4   0 343.365  22.697   4
   1   4   0 352.364  22.034   5
   1   4   0 365.914  21.751   3
   1   4   0 341.977  23.564   2
  -1   4   0 337.885  21.771   3
   2  -4   0 25.0720  2.2758   4
   2  -4   0 24.4580  2.8480   2
  -2  -4   0 24.1398  2.1110   3
   2  -4   0 26.5516  3.9363   6
  -2  -4   0 24.8066  2.1519   5
   2   4   0 25.1028  2.6750   2
  -2   4   0 25.7985  2.1783   5
   2   4   0 26.9437  2.7911   4
   2   4   0 30.3281  5.0193   6
  -2   4   0 29.9887  5.7680   6
  -2   4   0 24.5870  2.1320   3
  -2   4   0 27.1648  2.8806   2
  -3  -4   0 30.6128  2.7030   5
   3  -4   0 33.2498  3.0354   2
   3  -4   0 28.9248  2.6965   4
  -3  -4   0 34.6677  2.6892   3
   3  -4   0 27.1584  4.3487   6
   3   4   0 27.6484  5.0594   6
  -3   4   0 29.2150  2.5986   5
  -3   4   0 31.8842  3.4274   2
  -3   4   0 28.3889  2.5848   3
   3   4   0 32.1355  2.9162   4
   3   4   0 35.1211  2.9382   2
  -3   4   0 44.4144  6.0989   6
   4  -4   0 811.847  70.706   6
  -4  -4   0 733.185  46.582   3
  -4  -4   0 711.643  47.225   5
   4  -4   0 767.311  50.201   2
   4  -4   0 757.641  47.986   4
  -4   4   0 711.475  47.213   5
  -4   4   0 791.245  50.322   2
  -4   4   0 694.372  46.555   3
  -4   4   0 814.460  70.934   6
   4   4   0 749.165  70.251   6
   4   4   0 741.127  49.969   2
   4   4   0 663.776  48.060   4
  -5  -4   0 6.89478 1.54055   5
   5  -4   0 9.51343 2.54080   6
   5  -4   0 10.8087  2.1193   2
  -5  -4   0 10.2738  1.7739   3
   5  -4   0 7.22096 1.70111   4
   5   4   0 6.88837 1.70869   4
   5   4   0 8.22301 1.77440   2
  -5   4   0 11.1681  1.8970   5
   5   4   0 9.10793 3.06551   6
  -5   4   0 8.02362 1.90339   2
  -5   4   0 7.35643 1.58028   3
  -5   4   0 4.96289 3.61817   6
  -6  -4   0 95.9567  7.7096   5
   6  -4   0 113.262   8.016   4
   6  -4   0 105.768  11.688   6
  -6  -4   0 113.210   7.807   3
   6  -4   0 112.563   8.445   2
   6   4   0 112.392   8.175   4
   6   4   0 99.4124 11.6194   6
   6   4   0 99.2855  8.0946   2
  -6   4   0 99.0518  7.6992   5
  -6   4   0 97.7264  7.6078   3
  -6   4   0 109.772  12.597   6
  -7  -4   0 18.4362  2.8857   3
   7  -4   0 21.9241  3.2284   4
  -7  -4   0 19.0380  3.0749   5
   7  -4   0 19.3439  3.2484   2
   7  -4   0 22.4118  4.3869   6
  -7   4   0 18.9282  2.9591   5
  -7   4   0 17.6018  4.8709   6
   7   4   0 23.3674  3.3539   4
   7   4   0 19.9053  4.2143   6
   7   4   0 23.6376  3.3050   2
  -7   4   0 20.6110  3.0564   3
   8  -4   0 69.9894 10.0024   6
  -8  -4   0 87.4989  7.0108   3
   8  -4   0 79.2329  7.3131   2
  -8  -4   0 83.1815  6.9667   5
   8  -4   0 100.230   7.267   4
  -8   4   0 97.8469  7.1491   3
   8   4   0 71.6850  6.9142   4
   8   4   0 82.8458 10.3456   6
   8   4   0 91.1630  7.3614   2
  -8   4   0 98.1760  7.1481   5
  -9  -4   0 20.2509  3.5990   3
  -9  -4   0 36.1393  4.5969   5
   9  -4   0 22.7155  5.0363   6
   9  -4   0 24.9248  4.1683   2
   9  -4   0 38.1284  4.6074   4
   9   4   0 27.8053  5.3849   6
  -9   4   0 38.8082  4.5424   3
  -9   4   0 26.7421  3.9948   5
   9   4   0 36.8592  4.6825   2
   9   4   0 36.8447  4.7870   4
  10  -4   0 51.5939  5.7942   4
 -10  -4   0 41.7450  5.2670   5
  10  -4   0 36.3855  5.0768   2
  10  -4   0 32.7623  6.2073   6
 -10  -4   0 36.6859  5.0018   3
 -10   4   0 47.8119  5.4734   5
  10   4   0 34.5591  6.4654   6
  10   4   0 40.0697  5.3912   2
  10   4   0 32.8478  4.8262   4
 -10   4   0 31.5665  4.6523   3
 -11  -4   0 -0.7636  2.1447   3
  11  -4   0 0.52542 1.94208   4
  11  -4   0 -0.0503  2.2977   2
  11  -4   0 0.14326 2.46589   6
 -11  -4   0 -1.4977  2.0063   5
  11   4   0 -0.0671  1.9713   2
  11   4   0 -1.4581  1.4325   4
 -11   4   0 -0.3679  1.5142   5
 -11   4   0 -1.7538  1.4116   3
  12  -4   0 78.8301  8.0931   4
  12  -4   0 33.3490  9.6930   6
  12  -4   0 61.7581  7.7896   2
 -12  -4   0 61.0094  7.3419   3
 -12  -4   0 74.5549  8.1914   5
 -12   4   0 74.6660  8.0255   5
 -12   4   0 111.318   9.476   3
  12   4   0 71.2810  7.9577   2
  12   4   0 68.3800  7.8453   4
  13  -4   0 3.01226 2.55928   4
  13  -4   0 -15.843   4.239   6
 -13  -4   0 3.99633 2.72819   3
  13  -4   0 3.54765 2.91260   2
 -13  -4   0 -0.6616  2.4658   5
  13   4   0 1.88194 2.13485   4
  13   4   0 1.71118 2.49302   2
 -13   4   0 -0.0672  1.9996   5
 -13   4   0 3.28571 2.20081   3
 -14  -4   0 10.2480  3.9218   3
  14  -4   0 21.2572  4.6562   4
 -14  -4   0 17.5100  4.2772   5
  14  -4   0 13.4603  4.8330   2
  14   4   0 19.2361  4.7058   4
 -14   4   0 18.7464  4.4045   5
 -14   4   0 15.7213  3.8599   3
 -15  -4   0 -1.7927  2.8406   3
 -15  -4   0 8.12543 3.63631   5
  15  -4   0 -2.0084  3.3509   2
 -15   4   0 0.31749 2.44812   5
 -15   4   0 2.99956 3.01120   3
  15   4   0 -0.2645  2.5904   4
 -16  -4   0 -0.2623  2.9345   3
 -16  -4   0 -1.7651  3.6701   5
 -16   4   0 2.16128 2.81719   3
  16   4   0 0.47237 3.47930   4
 -16   4   0 -2.7816  2.8003   5
  17   4   0 3.40212 4.36107   4
   0  -5   0 0.58402 0.69543   4
   0   5   0 -0.6964  0.3162   5
   0   5   0 0.21402 0.37321   3
   0   5   0 0.14671 0.64266   2
   0   5   0 -0.3552  3.9815   6
  -1  -5   0 -0.4662  0.4520   5
   1  -5   0 0.92406 0.67007   4
  -1  -5   0 0.25717 0.53177   3
   1   5   0 -0.1288  0.4917   4
  -1   5   0 -0.0534  0.4344   5
  -1   5   0 0.08686 0.36952   3
  -1   5   0 0.78232 0.68435   2
  -1   5   0 0.61359 3.82790   6
   1   5   0 0.04422 0.37804   3
   1   5   0 -0.3453  0.3421   5
   1   5   0 0.71332 0.66869   2
   1   5   0 1.90951 3.76437   6
   2  -5   0 0.53304 1.09081   6
   2  -5   0 0.00262 0.68470   4
  -2  -5   0 0.68058 0.68415   5
   2  -5   0 -0.6980  0.6163   2
  -2  -5   0 0.17521 0.55877   3
  -2   5   0 2.16011 0.72822   3
  -2   5   0 4.04385 3.99765   6
   2   5   0 2.31368 0.96397   4
   2   5   0 0.41042 0.56285   3
   2   5   0 -2.0115  3.3867   6
   2   5   0 1.69550 0.63930   5
  -2   5   0 1.90433 0.92047   2
   2   5   0 1.04468 0.75382   2
   3  -5   0 41.2914  3.8996   2
   3  -5   0 49.3016  5.7595   6
  -3  -5   0 38.6789  3.3320   3
  -3  -5   0 34.8675  3.3642   5
   3  -5   0 42.3702  3.6320   4
   3   5   0 42.7644  6.0479   6
   3   5   0 46.0071  3.8168   2
  -3   5   0 46.9932  3.5066   5
  -3   5   0 46.8408  7.1295   6
   3   5   0 39.3157  3.6920   4
  -3   5   0 43.9658  3.4425   3
  -3   5   0 43.8389  3.9271   2
   4  -5   0 23.9037  2.8331   4
   4  -5   0 25.8973  4.2260   6
  -4  -5   0 19.4114  2.4567   3
  -4  -5   0 21.1066  2.5666   5
   4  -5   0 24.7865  3.1693   2
   4   5   0 21.2467  2.9371   4
  -4   5   0 23.3236  2.5910   3
  -4   5   0 25.8060  2.7571   5
   4   5   0 26.7667  3.0689   2
  -4   5   0 18.9679  5.1845   6
   4   5   0 17.6699  4.1274   6
  -4   5   0 19.7384  2.9404   2
  -5  -5   0 -1.2976  0.8597   5
   5  -5   0 -2.1895  0.8200   4
   5  -5   0 -0.6711  0.8677   2
   5  -5   0 0.48626 1.33253   6
  -5  -5   0 1.13373 1.09675   3
   5   5   0 -1.0101  2.2526   6
  -5   5   0 0.88007 2.83512   6
   5   5   0 -0.2038  0.9382   2
  -5   5   0 -0.3572  0.9532   2
  -5   5   0 0.20244 0.75292   3
  -5   5   0 -0.5846  0.6780   5
   5   5   0 0.18472 0.99498   4
   6  -5   0 57.9821  7.5538   6
   6  -5   0 51.9332  5.2673   2
   6  -5   0 56.7873  5.1063   4
  -6  -5   0 58.0592  4.9628   5
  -6  -5   0 64.3089  5.0424   3
  -6   5   0 55.7943  4.9861   5
   6   5   0 64.0987  7.9615   6
  -6   5   0 65.0894  5.0567   3
  -6   5   0 50.7313  8.1147   6
   6   5   0 66.8256  5.3574   2
   6   5   0 57.7630  5.2385   4
  -6   5   0 62.9103  5.6576   2
  -7  -5   0 3.24852 1.61413   5
   7  -5   0 5.92325 2.09442   2
   7  -5   0 3.58615 1.97390   6
   7  -5   0 6.91090 2.02066   4
  -7  -5   0 2.43774 1.51353   3
  -7   5   0 4.92307 3.60680   6
  -7   5   0 4.52614 1.56124   3
   7   5   0 3.18863 1.67223   2
   7   5   0 3.40096 1.69029   4
   7   5   0 3.93750 2.72353   6
  -7   5   0 2.48255 1.35852   5
   8  -5   0 6.60300 2.36526   4
   8  -5   0 10.2171  2.6089   2
   8  -5   0 7.93867 2.90915   6
  -8  -5   0 6.55610 2.01606   5
  -8  -5   0 5.81933 1.98433   3
  -8   5   0 7.01451 2.01064   3
  -8   5   0 7.33905 2.26296   5
   8   5   0 6.07059 3.03054   6
   8   5   0 11.4828  2.5853   2
  -8   5   0 3.70476 3.19131   6
   8   5   0 4.27440 1.86208   4
   9  -5   0 0.13875 1.64150   2
   9  -5   0 -0.2091  2.0422   6
  -9  -5   0 -0.8933  1.2055   3
   9  -5   0 3.90138 2.27891   4
  -9  -5   0 0.23326 1.83089   5
  -9   5   0 2.17049 1.61040   3
  -9   5   0 -0.8134  1.5860   5
   9   5   0 0.21510 1.69792   2
   9   5   0 -2.6841  2.1016   6
   9   5   0 2.24872 1.81932   4
 -10  -5   0 7.67113 2.59482   3
  10  -5   0 2.95190 2.52225   6
 -10  -5   0 2.20978 1.93582   5
  10  -5   0 4.51460 2.53367   2
  10  -5   0 7.37937 2.84570   4
  10   5   0 4.21680 2.39060   4
  10   5   0 8.20368 2.71905   2
  10   5   0 2.67375 3.04705   6
 -10   5   0 4.02876 1.96941   5
 -10   5   0 6.99257 2.23895   3
  11  -5   0 6.43932 2.66725   2
  11  -5   0 12.4211  3.4072   4
 -11  -5   0 6.49306 2.44993   3
  11  -5   0 5.73246 2.99130   6
 -11  -5   0 3.33603 2.31730   5
  11   5   0 14.1761  3.3178   2
  11   5   0 6.30809 2.82180   4
 -11   5   0 9.08426 3.01474   5
 -11   5   0 1.49103 1.89250   3
  12  -5   0 -1.5862  2.7984   2
 -12  -5   0 -2.2391  1.7006   3
  12  -5   0 2.08375 2.29184   4
 -12  -5   0 2.72267 2.26948   5
  12  -5   0 0.64783 2.78997   6
  12   5   0 2.71734 2.15066   2
  12   5   0 3.37282 2.32948   4
 -12   5   0 0.49887 1.93633   3
 -12   5   0 -1.6579  1.9570   5
  13  -5   0 1.17173 3.13418   2
  13  -5   0 3.88293 2.83360   4
 -13  -5   0 -2.6152  2.3464   3
 -13  -5   0 0.75558 2.47997   5
 -13   5   0 0.39489 2.44368   5
 -13   5   0 -0.3345  1.9762   3
  13   5   0 1.52849 2.50347   4
  14  -5   0 -0.9012  3.2049   2
 -14  -5   0 6.77800 3.33071   5
 -14  -5   0 15.0018  4.0410   3
 -14   5   0 6.14935 2.70810   3
  14   5   0 5.58169 3.20677   4
 -14   5   0 4.49575 2.76382   5
  15  -5   0 0.11419 3.63063   2
 -15  -5   0 0.22366 3.16789   5
 -15  -5   0 -0.5763  3.0442   3
 -15   5   0 -0.8482  2.8448   3
 -15   5   0 0.16388 2.61722   5
  15   5   0 -1.8849  2.9646   4
 -16  -5   0 0.54153 3.60891   5
 -16  -5   0 1.78711 3.21736   3
  16   5   0 -0.5717  3.0506   4
 -16   5   0 -0.2909  2.7828   5
 -16   5   0 4.31080 3.26791   3
   0  -6   0 160.447  11.147   4
   0   6   0 156.544  10.262   3
   0   6   0 163.890  10.444   5
   0   6   0 150.876  11.443   2
   0   6   0 159.628  16.932   6
  -1  -6   0 73.9215  5.1486   5
  -1  -6   0 78.6051  5.0908   3
   1  -6   0 75.7247  5.5318   4
  -1   6   0 75.9674  9.6148   6
  -1   6   0 76.3771  5.8197   2
   1   6   0 67.2020  4.8921   3
  -1   6   0 67.3418  4.9902   5
   1   6   0 69.8690  9.3834   6
   1   6   0 72.2638  5.6841   2
  -1   6   0 64.9500  4.8920   3
   1   6   0 69.0618  4.9689   5
  -2  -6   0 167.481  11.568   5
  -2  -6   0 169.028  11.418   3
   2  -6   0 181.895  12.801   2
   2  -6   0 183.154  12.113   4
  -2   6   0 187.026  12.784   2
   2   6   0 174.312  12.222   4
   2   6   0 165.264  11.464   5
   2   6   0 168.803  11.322   3
  -2   6   0 179.713  11.467   3
  -2   6   0 165.709  11.560   5
   2   6   0 194.916  18.535   6
  -2   6   0 177.568  18.607   6
   2   6   0 176.873  12.539   2
  -3  -6   0 482.572  31.003   5
   3  -6   0 532.930  33.364   2
  -3  -6   0 465.107  30.527   3
   3  -6   0 486.215  31.668   4
   3  -6   0 538.369  47.071   6
   3   6   0 447.264  31.798   4
   3   6   0 502.768  46.618   6
  -3   6   0 435.598  33.145   2
  -3   6   0 480.801  31.026   5
  -3   6   0 485.473  30.626   3
  -3   6   0 502.677  47.093   6
   3   6   0 468.482  32.971   2
   4  -6   0 391.844  25.454   2
   4  -6   0 360.006  24.080   4
  -4  -6   0 345.598  23.562   5
   4  -6   0 413.406  36.013   6
  -4  -6   0 350.714  23.228   3
  -4   6   0 370.497  23.345   3
   4   6   0 361.519  25.102   2
  -4   6   0 338.387  35.783   6
   4   6   0 376.857  24.429   4
  -4   6   0 349.960  23.590   5
   4   6   0 376.255  35.423   6
  -4   6   0 333.216  25.278   2
  -5  -6   0 61.5283  4.6577   3
   5  -6   0 53.8849  7.2433   6
  -5  -6   0 57.6275  4.6820   5
   5  -6   0 61.8817  5.3545   2
   5  -6   0 57.8110  4.8414   4
  -5   6   0 55.8295  4.6234   5
  -5   6   0 53.6368  4.5192   3
   5   6   0 62.0845  5.1769   4
   5   6   0 54.6663  4.9272   2
  -5   6   0 57.6003  8.2366   6
   5   6   0 39.3132  7.0721   6
  -5   6   0 52.5101  5.1540   2
   6  -6   0 105.922   8.436   2
   6  -6   0 105.726   7.911   4
   6  -6   0 92.3406 11.5512   6
  -6  -6   0 104.309   7.742   5
  -6  -6   0 99.5523  7.5482   3
   6   6   0 104.040   8.113   2
   6   6   0 106.035  11.674   6
  -6   6   0 92.6458  8.3222   2
   6   6   0 100.578   8.082   4
  -6   6   0 102.715   7.586   3
  -6   6   0 102.873   7.708   5
  -6   6   0 98.5232 12.2610   6
   7  -6   0 19.4165  3.2151   2
   7  -6   0 12.5692  2.8037   4
  -7  -6   0 15.8376  2.6683   3
   7  -6   0 8.18827 3.01776   6
  -7  -6   0 17.3239  2.8101   5
   7   6   0 12.7276  3.7921   6
  -7   6   0 12.3353  2.4541   3
  -7   6   0 16.2226  2.6497   5
   7   6   0 13.2443  2.7477   2
  -7   6   0 10.8614  4.2682   6
   7   6   0 15.7866  2.9196   4
  -7   6   0 9.36655 2.48151   2
   8  -6   0 1.73200 1.85282   2
   8  -6   0 0.51508 1.57800   6
   8  -6   0 7.77890 2.39113   4
  -8  -6   0 -0.9972  1.1965   5
  -8  -6   0 1.24507 1.56360   3
   8   6   0 3.08970 2.85470   6
  -8   6   0 -0.6151  2.6835   6
   8   6   0 -1.0532  1.3517   2
  -8   6   0 -0.2074  1.0439   3
  -8   6   0 -1.8274  1.2761   5
   8   6   0 0.74764 1.57820   4
  -9  -6   0 12.3402  2.9389   3
   9  -6   0 26.5862  4.0208   4
   9  -6   0 13.3237  4.0637   6
   9  -6   0 28.6229  4.3066   2
  -9  -6   0 22.3517  3.5977   5
  -9   6   0 17.6499  3.3584   3
   9   6   0 27.1831  4.2557   4
  -9   6   0 20.4317  3.6223   5
   9   6   0 16.5311  4.5095   6
   9   6   0 23.6363  3.7826   2
 -10  -6   0 2.49797 2.18865   5
  10  -6   0 -0.6159  2.1273   6
  10  -6   0 -3.7827  1.4146   2
 -10  -6   0 -1.3327  1.3844   3
  10  -6   0 -1.5870  2.0626   4
 -10   6   0 0.17545 1.76296   3
 -10   6   0 -1.0778  1.5843   5
  10   6   0 3.68734 2.15887   4
  10   6   0 1.79693 1.80781   2
  11  -6   0 7.97950 3.54975   6
  11  -6   0 9.16360 3.18040   4
 -11  -6   0 7.18561 2.75676   3
 -11  -6   0 14.4428  3.5770   5
  11  -6   0 10.7985  3.4441   2
 -11   6   0 10.4731  2.9143   3
 -11   6   0 10.0522  2.9765   5
  11   6   0 11.1267  3.2691   4
  11   6   0 10.7365  3.0125   2
  12  -6   0 24.6747  5.0464   2
 -12  -6   0 14.3286  3.6744   5
  12  -6   0 21.5593  4.5013   4
 -12  -6   0 16.1371  4.0640   3
  12  -6   0 15.4875  4.6796   6
 -12   6   0 11.8084  3.5999   5
 -12   6   0 12.6699  3.4614   3
  12   6   0 16.4990  3.6881   2
  12   6   0 12.5570  3.8698   4
 -13  -6   0 38.2750  6.0072   3
  13  -6   0 46.0078  6.4260   4
 -13  -6   0 34.6198  5.6039   5
  13  -6   0 22.3808  6.7763   6
  13  -6   0 33.9689  5.9840   2
 -13   6   0 42.5409  6.1837   3
 -13   6   0 35.1224  5.7366   5
  13   6   0 42.8674  6.3167   4
  14  -6   0 -3.3190  3.0866   2
 -14  -6   0 1.70515 2.74755   5
 -14  -6   0 0.08221 2.97528   3
 -14   6   0 6.66693 3.31532   5
  14   6   0 1.37710 3.11190   4
 -14   6   0 1.28906 2.25117   3
 -15  -6   0 4.77239 3.56122   3
 -15  -6   0 4.88561 3.57949   5
  15  -6   0 7.17823 4.45616   2
  15   6   0 2.30650 2.97028   4
 -15   6   0 2.67661 3.08342   5
 -15   6   0 -0.1191  2.3708   3
 -16  -6   0 -1.3402  3.4800   3
 -16  -6   0 2.70633 3.82043   5
  16   6   0 6.77537 3.86250   4
   0  -7   0 -1.7537  0.7940   4
   0   7   0 -0.3965  0.5679   5
   0   7   0 -0.7342  0.6852   2
   0   7   0 -7.3331  3.0391   6
   0   7   0 0.68687 0.58689   3
  -1  -7   0 1.16216 0.84077   5
  -1  -7   0 3.59667 1.02453   3
   1  -7   0 2.62418 1.23788   4
  -1   7   0 3.94029 3.81159   6
   1   7   0 1.73565 0.74447   3
   1   7   0 1.85408 1.03973   2
  -1   7   0 2.18622 0.78066   5
  -1   7   0 2.84365 0.84999   3
   1   7   0 1.87478 2.99621   6
   1   7   0 1.45429 0.72838   5
  -1   7   0 3.16903 1.22554   2
   2  -7   0 0.89679 0.94778   4
  -2  -7   0 -0.2316  0.7181   3
  -2  -7   0 2.51621 0.96069   5
   2  -7   0 -0.9352  0.7385   2
   2   7   0 1.13566 0.70811   3
   2   7   0 1.29447 0.94734   2
  -2   7   0 1.04983 0.91716   2
   2   7   0 1.53476 1.03823   4
  -2   7   0 -0.5856  3.0796   6
  -2   7   0 0.78675 0.66859   3
   2   7   0 -0.2669  0.5417   5
   2   7   0 1.26735 2.66297   6
  -2   7   0 -0.4401  0.5828   5
  -3  -7   0 11.7704  1.9050   5
   3  -7   0 11.6749  2.9799   6
   3  -7   0 14.1249  2.2284   4
   3  -7   0 11.9155  2.3384   2
  -3  -7   0 13.3939  1.8378   3
  -3   7   0 11.7277  2.2729   2
  -3   7   0 11.5811  1.7844   5
   3   7   0 13.0751  3.6231   6
  -3   7   0 8.23386 4.10531   6
   3   7   0 10.6504  2.0318   2
   3   7   0 11.4454  2.1897   4
  -3   7   0 11.7368  1.7905   3
  -4  -7   0 2.65443 1.26048   5
   4  -7   0 4.87786 1.78342   2
   4  -7   0 3.30341 1.94001   6
   4  -7   0 3.02240 1.33615   4
  -4  -7   0 3.73830 1.27609   3
  -4   7   0 3.23146 3.10582   6
  -4   7   0 7.85691 1.91298   2
  -4   7   0 5.19199 1.35206   3
   4   7   0 6.22134 1.71258   4
   4   7   0 2.46389 2.93297   6
   4   7   0 4.75613 1.59701   2
  -4   7   0 3.17022 1.12880   5
   5  -7   0 4.52801 1.77179   2
  -5  -7   0 0.53972 1.16739   3
   5  -7   0 3.10961 1.57143   4
   5  -7   0 2.37652 1.77794   6
  -5  -7   0 0.34836 1.26619   5
   5   7   0 4.62587 2.88425   6
  -5   7   0 7.48921 2.06399   2
  -5   7   0 2.41923 1.24978   3
   5   7   0 3.32711 1.48419   2
  -5   7   0 3.69436 2.92508   6
  -5   7   0 2.93887 1.21733   5
   5   7   0 0.98388 1.16781   4
   6  -7   0 13.0596  2.5527   4
  -6  -7   0 13.9451  2.4055   3
   6  -7   0 14.3316  3.8237   6
  -6  -7   0 15.5677  2.5991   5
   6  -7   0 15.6402  2.9215   2
  -6   7   0 16.4295  2.6509   5
  -6   7   0 11.6691  2.5941   2
  -6   7   0 6.95160 3.68088   6
   6   7   0 13.4269  2.7460   4
   6   7   0 12.3697  3.7836   6
  -6   7   0 16.1168  2.5469   3
   6   7   0 14.5225  2.7354   2
  -7  -7   0 0.97352 1.52469   5
   7  -7   0 3.05479 2.25238   6
  -7  -7   0 1.64986 1.50843   3
   7  -7   0 4.07112 1.86748   2
   7  -7   0 1.22471 1.77711   4
  -7   7   0 3.35202 2.01002   2
   7   7   0 0.72737 2.71611   6
  -7   7   0 0.87773 2.81015   6
   7   7   0 2.32258 1.70031   2
   7   7   0 1.79459 1.75195   4
  -7   7   0 2.36527 1.45654   3
  -7   7   0 5.63648 1.94331   5
   8  -7   0 4.39215 2.10508   2
   8  -7   0 8.54161 2.54555   4
  -8  -7   0 7.18474 2.25747   3
   8  -7   0 8.26161 3.04871   6
  -8  -7   0 7.35666 2.42977   5
  -8   7   0 6.34635 2.02680   3
   8   7   0 7.72870 2.28507   2
  -8   7   0 11.5637  4.4111   6
  -8   7   0 7.41609 2.31518   5
   8   7   0 6.75508 3.06706   6
   8   7   0 6.96142 2.61342   4
  -9  -7   0 11.7591  2.8994   5
   9  -7   0 14.1089  3.4180   4
   9  -7   0 12.5631  3.4128   2
   9  -7   0 15.3630  4.2982   6
  -9  -7   0 10.6607  2.6528   3
  -9   7   0 13.3058  3.1349   5
   9   7   0 13.0532  3.0851   2
  -9   7   0 10.3896  4.5501   6
   9   7   0 14.2929  4.1328   6
  -9   7   0 14.2161  3.0265   3
   9   7   0 15.1444  3.3430   4
  10  -7   0 1.54856 2.27604   4
  10  -7   0 1.56967 2.33734   2
 -10  -7   0 3.49897 2.25776   5
  10  -7   0 0.79287 2.68716   6
 -10  -7   0 0.09673 2.02503   3
  10   7   0 0.64712 2.04102   4
 -10   7   0 0.76354 1.56188   3
  10   7   0 -1.3782  1.7099   2
 -10   7   0 1.71696 1.73563   5
  11  -7   0 21.9255  4.3064   4
  11  -7   0 17.7464  5.3081   6
 -11  -7   0 18.4534  3.8714   5
 -11  -7   0 19.4124  3.8468   3
  11  -7   0 13.7693  3.6756   2
 -11   7   0 14.5258  3.6110   3
  11   7   0 16.7001  3.8405   4
 -11   7   0 11.2946  3.0712   5
  11   7   0 14.9330  3.5412   2
  12  -7   0 0.86051 2.74175   6
 -12  -7   0 3.52821 2.75065   3
  12  -7   0 3.60132 3.00861   4
 -12  -7   0 7.36057 3.04480   5
  12  -7   0 5.24713 3.23180   2
 -12   7   0 1.63064 2.07258   3
  12   7   0 3.91441 2.48313   4
 -12   7   0 3.98513 2.67861   5
  12   7   0 5.57749 3.03544   2
 -13  -7   0 5.37542 3.19014   3
 -13  -7   0 0.83128 2.55403   5
  13  -7   0 8.15137 3.25687   6
  13  -7   0 3.99069 3.39476   2
 -13   7   0 3.24068 3.02546   5
 -13   7   0 3.72449 2.96246   3
  13   7   0 2.87129 3.04492   4
 -14  -7   0 -1.0844  2.4578   5
  14  -7   0 -3.9646  2.9903   2
 -14  -7   0 3.90294 3.47135   3
 -14   7   0 1.05542 2.76281   3
  14   7   0 4.31580 2.88129   4
 -14   7   0 -0.2596  2.7400   5
 -15  -7   0 0.95486 3.01299   5
 -15  -7   0 -1.8689  3.0098   3
  15  -7   0 -4.9675  3.1943   2
  15   7   0 0.03228 2.95804   4
 -15   7   0 3.56368 3.19972   3
 -15   7   0 -0.8296  3.2965   5
  16  -7   0 -4.7648  4.1930   2
 -16  -7   0 -0.3511  3.5747   3
 -16  -7   0 0.99655 3.94507   5
  16   7   0 0.83260 4.11771   4
   0  -8   0 143.224  10.486   4
   0   8   0 143.172  15.646   6
   0   8   0 139.533   9.443   3
   0   8   0 140.334  10.749   2
   0   8   0 144.278   9.592   5
   1  -8   0 70.4707  5.9740   4
  -1  -8   0 72.0479  5.4977   5
  -1  -8   0 77.3206  5.4668   3
   1   8   0 77.4643  6.2648   2
  -1   8   0 69.1627  5.2524   3
   1   8   0 78.8053  5.3890   5
  -1   8   0 75.1258  5.3957   5
   1   8   0 72.5726  5.2584   3
  -1   8   0 76.1484  6.3754   2
  -1   8   0 72.7296  9.7589   6
   1   8   0 73.9595  9.5644   6
   2  -8   0 122.428   9.695   2
   2  -8   0 123.318   9.089   4
  -2  -8   0 121.975   8.406   3
  -2  -8   0 116.476   8.499   5
   2   8   0 130.849   8.429   5
   2   8   0 118.687  13.968   6
  -2   8   0 123.923   8.437   3
  -2   8   0 120.100   9.559   2
  -2   8   0 113.007  14.008   6
   2   8   0 127.306   8.299   3
  -2   8   0 126.341   8.547   5
   2   8   0 120.117   9.455   2
   3  -8   0 5.58773 2.25873   6
  -3  -8   0 5.99952 1.44713   3
   3  -8   0 3.27455 1.75735   2
   3  -8   0 6.09972 1.57814   4
  -3  -8   0 4.96878 1.47790   5
  -3   8   0 7.12751 3.33138   6
  -3   8   0 5.56607 1.30449   3
  -3   8   0 5.24440 1.37039   5
   3   8   0 7.78523 3.19996   6
   3   8   0 4.49946 1.60084   4
   3   8   0 7.17857 1.91159   2
  -3   8   0 6.82525 1.91309   2
   4  -8   0 43.7328  4.7389   4
   4  -8   0 36.4647  6.5102   6
  -4  -8   0 45.4528  3.7864   3
  -4  -8   0 42.1987  3.2800   1
  -4  -8   0 44.6734  3.9081   5
   4  -8   0 51.6652  5.5073   2
   4   8   0 47.3367  4.9743   2
  -4   8   0 40.8192  3.8148   5
   4   8   0 42.4313  5.0444   4
  -4   8   0 54.3964  5.5942   2
  -4   8   0 44.4422  3.8582   3
  -4   8   0 48.4411  7.3782   6
   4   8   0 38.4374  6.6967   6
   5  -8   0 7.23748 2.24978   2
  -5  -8   0 6.06854 1.76634   5
   5  -8   0 3.70290 2.19058   6
   5  -8   0 0.87783 1.41170   4
  -5  -8   0 2.72136 1.40344   3
  -5   8   0 4.74078 1.89923   2
   5   8   0 5.92621 3.14272   6
  -5   8   0 8.26040 3.47370   6
   5   8   0 3.04651 1.50045   2
  -5   8   0 3.43910 1.40312   5
   5   8   0 2.76135 1.48504   4
  -5   8   0 4.72435 1.57604   3
   6  -8   0 52.3505  6.0617   2
   6  -8   0 46.7266  7.8746   6
  -6  -8   0 49.9545  5.0960   3
  -6  -8   0 44.0501  5.0844   5
   6  -8   0 60.1396  5.1458   4
  -6   8   0 56.6783  6.3516   2
  -6   8   0 47.3253  5.2063   3
   6   8   0 58.1573  6.1366   4
   6   8   0 55.7077  5.9099   2
  -6   8   0 46.8756  8.0812   6
  -6   8   0 51.6759  5.4017   5
   6   8   0 56.8986  7.8874   6
   7  -8   0 33.7499  4.3722   4
  -7  -8   0 29.3283  3.8013   3
  -7  -8   0 38.3073  4.4647   5
   7  -8   0 25.5736  5.4917   6
   7  -8   0 35.2872  4.7306   2
   7   8   0 24.8807  5.3789   6
  -7   8   0 28.3633  4.5266   2
  -7   8   0 24.0135  3.6457   5
  -7   8   0 28.2012  3.9273   3
   7   8   0 34.9757  4.6741   4
   7   8   0 28.9842  4.1936   2
  -7   8   0 23.7941  5.7902   6
  -8  -8   0 56.3595  5.4895   3
   8  -8   0 39.8872  5.3384   4
  -8  -8   0 47.5276  5.4145   5
   8  -8   0 36.4364  5.3604   2
   8  -8   0 39.0895  7.2850   6
  -8   8   0 34.6125  7.4932   6
   8   8   0 49.1407  5.6988   2
   8   8   0 33.1145  6.6193   6
  -8   8   0 51.1651  5.5247   3
   8   8   0 41.5065  5.5524   4
  -8   8   0 42.7125  5.9003   2
  -8   8   0 37.7776  5.0515   5
  -9  -8   0 40.1111  5.1853   5
   9  -8   0 34.4947  5.0534   4
   9  -8   0 31.2236  5.1254   2
   9  -8   0 31.2855  6.6121   6
  -9  -8   0 35.9757  4.8284   3
  -9   8   0 29.7272  6.9540   6
   9   8   0 44.1935  5.8681   4
  -9   8   0 46.9321  5.4532   3
   9   8   0 39.5664  5.1875   2
   9   8   0 33.5259  6.4181   6
  10  -8   0 4.81305 2.88497   4
 -10  -8   0 1.14025 2.21047   3
  10  -8   0 5.12535 3.40637   6
  10  -8   0 -0.0043  2.4192   2
 -10  -8   0 3.90585 2.56524   5
 -10   8   0 5.80614 2.48266   5
  10   8   0 11.0838  3.2217   4
  10   8   0 4.18361 2.26200   2
 -10   8   0 4.56040 3.96195   6
 -10   8   0 3.32885 1.93971   3
  11  -8   0 1.44296 2.84663   4
 -11  -8   0 -0.0200  2.1622   3
  11  -8   0 -0.2425  2.2934   2
 -11  -8   0 1.19109 2.50164   5
  11  -8   0 -0.9672  2.8541   6
 -11   8   0 5.59549 2.62747   3
  11   8   0 1.50968 1.99665   2
  11   8   0 2.15740 2.25340   4
 -11   8   0 0.82939 2.18031   5
 -12  -8   0 24.3181  4.6008   3
  12  -8   0 16.8614  5.4273   6
 -12  -8   0 22.2649  4.6352   5
  12  -8   0 24.5792  5.1493   2
  12  -8   0 28.5453  5.2267   4
 -12   8   0 18.3782  4.1227   5
 -12   8   0 21.0214  4.1576   3
  12   8   0 25.0300  4.9462   4
  13  -8   0 5.29889 3.82831   6
 -13  -8   0 6.58314 3.08100   3
 -13  -8   0 11.7565  3.9018   5
  13  -8   0 3.11316 3.23131   2
 -13   8   0 5.42698 3.01810   3
 -13   8   0 4.98498 3.11322   5
  13   8   0 5.88454 2.99726   4
  14  -8   0 -2.1834  2.6606   2
 -14  -8   0 0.33144 3.06214   3
 -14  -8   0 -0.8047  2.9205   5
  14   8   0 -1.3413  3.0241   4
 -14   8   0 9.64022 3.76747   5
 -14   8   0 -3.5885  2.4917   3
  15  -8   0 1.87241 4.04113   2
 -15  -8   0 2.25035 3.82977   5
 -15  -8   0 -1.3007  3.0719   3
  15   8   0 1.64691 3.85231   4
 -15   8   0 2.80394 3.35731   3
 -15   8   0 1.76602 2.71597   5
 -16  -8   0 7.00899 4.37131   3
 -16  -8   0 8.03899 4.72651   5
   0  -9   0 0.29477 0.88186   3
   0  -9   0 -0.8715  1.0615   4
   0  -9   0 -0.3666  0.8706   5
   0   9   0 0.92365 0.68549   3
   0   9   0 -0.7415  0.9182   2
   0   9   0 -0.2174  0.6109   5
   0   9   0 -0.2777  2.7545   6
  -1  -9   0 29.7035  2.9864   3
  -1  -9   0 31.6512  3.9870   4
  -1  -9   0 21.6648  2.7966   5
   1  -9   0 27.4939  3.6061   4
  -1   9   0 28.2073  2.8641   3
   1   9   0 26.2487  2.7091   3
   1   9   0 22.4742  3.4621   2
   1   9   0 18.0790  5.1117   6
  -1   9   0 28.7344  2.8613   5
  -1   9   0 26.2339  3.6529   2
   1   9   0 26.4410  2.7431   5
  -1   9   0 22.9017  5.1827   6
   2  -9   0 -1.2959  0.9229   2
  -2  -9   0 1.59857 1.03856   5
   2  -9   0 2.66030 1.43362   4
  -2  -9   0 1.09686 0.96541   3
   2   9   0 2.91473 0.95892   5
  -2   9   0 1.00135 0.91508   3
   2   9   0 1.18307 1.14495   2
  -2   9   0 1.19995 1.17655   2
  -2   9   0 0.91946 2.91521   6
   2   9   0 -1.5379  2.5274   6
  -2   9   0 1.23668 0.90192   5
   2   9   0 2.49935 0.90704   3
  -3  -9   0 6.78166 1.60377   5
   3  -9   0 7.56540 2.07285   2
   3  -9   0 7.16490 1.99550   4
   3  -9   0 4.84966 2.45615   6
   3   9   0 6.38276 1.86147   2
   3   9   0 5.91151 3.55696   6
  -3   9   0 4.94227 3.73709   6
   3   9   0 3.96910 1.66485   4
  -3   9   0 6.40064 1.54112   5
  -3   9   0 6.96402 1.54632   3
  -3   9   0 5.89584 2.05229   2
  -4  -9   0 -0.3484  1.0181   3
  -4  -9   0 -0.1449  1.1357   5
   4  -9   0 0.70140 1.51718   2
   4  -9   0 0.62104 1.28590   4
   4  -9   0 -0.3561  1.4456   6
  -4   9   0 -0.4105  0.8806   3
   4   9   0 -0.2963  1.2395   2
   4   9   0 1.57147 1.28173   4
  -4   9   0 0.31078 2.84030   6
  -4   9   0 2.05712 1.10676   5
   4   9   0 -2.1871  2.6720   6
  -4   9   0 -0.9160  1.1067   2
   5  -9   0 5.55821 2.18184   2
  -5  -9   0 7.63631 1.75276   3
  -5  -9   0 3.18941 1.61299   5
   5  -9   0 3.55882 1.73998   4
   5  -9   0 2.32818 2.09148   6
  -5   9   0 5.83364 1.70458   5
   5   9   0 2.28508 1.66550   2
  -5   9   0 3.37143 3.21088   6
  -5   9   0 5.55948 2.06019   2
   5   9   0 1.33325 2.86670   6
  -5   9   0 2.87449 1.29792   3
   5   9   0 5.76439 1.88583   4
  -6  -9   0 18.8315  2.9744   5
   6  -9   0 14.0803  4.1592   6
   6  -9   0 21.0114  3.3141   4
  -6  -9   0 14.2222  2.6264   3
   6  -9   0 21.9147  3.7994   2
   6   9   0 19.4073  4.6964   6
  -6   9   0 21.8972  3.2193   5
   6   9   0 19.7023  3.5548   4
  -6   9   0 17.4993  2.9556   3
   6   9   0 19.8331  3.4103   2
  -6   9   0 13.8203  4.5985   6
  -6   9   0 23.9902  3.9782   2
  -7  -9   0 6.03456 2.15061   5
   7  -9   0 5.53797 2.17583   4
   7  -9   0 9.50444 2.70243   2
   7  -9   0 5.23927 3.16740   6
  -7  -9   0 6.10257 2.01161   3
  -7   9   0 8.27844 2.76773   2
  -7   9   0 7.06155 2.21564   3
   7   9   0 8.25139 2.46222   2
  -7   9   0 11.5999  2.6138   5
   7   9   0 7.38148 3.50241   6
   7   9   0 4.02034 2.13601   4
  -7   9   0 6.07151 3.54537   6
  -8  -9   0 5.83936 2.20115   5
  -8  -9   0 5.75507 2.10781   3
   8  -9   0 1.11192 2.26852   4
   8  -9   0 3.94701 2.56850   2
   8  -9   0 4.04939 2.72565   6
   8   9   0 4.02457 3.17359   6
   8   9   0 8.55294 2.88362   4
  -8   9   0 7.73025 2.30702   5
  -8   9   0 3.80669 1.82347   3
  -8   9   0 5.95757 2.62758   2
   8   9   0 3.80563 2.10387   2
  -8   9   0 7.78206 4.28640   6
   9  -9   0 0.57635 2.00458   6
  -9  -9   0 1.69261 1.91595   3
   9  -9   0 -0.4154  1.8766   4
   9  -9   0 4.66492 2.22288   2
  -9  -9   0 0.64533 1.90889   5
   9   9   0 1.66563 1.59701   2
  -9   9   0 0.71603 1.79683   5
  -9   9   0 4.87712 2.22066   3
  -9   9   0 -2.0594  3.7042   6
   9   9   0 0.53471 1.70849   4
  10  -9   0 1.67091 2.52369   4
 -10  -9   0 4.71677 2.70032   5
  10  -9   0 2.40206 2.70117   6
  10  -9   0 2.66021 2.82305   2
 -10  -9   0 1.05496 2.19095   3
  10   9   0 2.65258 2.10026   2
  10   9   0 -0.2383  1.9828   4
 -10   9   0 -1.3554  4.1695   6
 -10   9   0 0.80408 1.94568   3
 -10   9   0 2.33313 2.22866   5
  11  -9   0 0.13921 2.68592   6
 -11  -9   0 5.45625 2.67985   3
  11  -9   0 6.12431 3.34655   4
  11  -9   0 7.43554 3.40616   2
 -11  -9   0 0.79798 2.50393   5
  11   9   0 9.04988 3.03815   2
 -11   9   0 5.92511 2.84056   3
  11   9   0 5.46461 2.94483   4
 -11   9   0 2.26138 2.31265   5
 -12  -9   0 0.86033 2.70764   5
  12  -9   0 -0.8543  3.0763   6
  12  -9   0 -0.2148  2.5915   2
 -12  -9   0 3.37893 2.85017   3
 -12   9   0 0.44443 2.24815   3
 -12   9   0 0.81802 2.58124   5
  12   9   0 4.64986 3.16601   4
  13  -9   0 -1.3820  2.8583   2
 -13  -9   0 2.09614 2.97199   3
  13  -9   0 0.41066 3.43425   6
 -13  -9   0 3.49196 3.39384   5
 -13   9   0 1.61948 2.95576   3
 -13   9   0 7.94606 3.18426   5
  13   9   0 0.28660 2.91601   4
 -14  -9   0 -0.0362  3.0812   5
  14  -9   0 7.41894 3.78019   6
  14  -9   0 -3.5921  2.9270   2
 -14   9   0 -0.2697  2.7303   5
 -14   9   0 -2.9123  2.5194   3
  14   9   0 0.17793 2.63214   4
 -15  -9   0 1.88259 3.10594   5
  15  -9   0 0.52994 3.88206   2
 -15   9   0 2.39144 3.06644   5
 -15   9   0 3.18835 2.88199   3
  15   9   0 0.27714 3.66958   4
   0 -10   0 34.6161  3.6095   3
   0 -10   0 36.6767  3.7069   5
   0 -10   0 40.0485  4.8252   4
   0  10   0 28.2347  3.1660   3
   0  10   0 33.2010  3.3169   5
   0  10   0 36.1776  4.6161   2
   0  10   0 25.9757  5.7600   6
  -1 -10   0 4.96583 1.48227   3
  -1 -10   0 11.0076  2.6969   4
   1 -10   0 4.98955 1.81004   4
  -1 -10   0 7.19785 1.69254   5
  -1  10   0 6.71550 1.49551   5
  -1  10   0 7.58450 1.57176   3
  -1  10   0 7.89550 3.55106   6
   1  10   0 8.09596 1.47973   5
   1  10   0 5.33450 2.00034   2
   1  10   0 5.92400 1.37375   3
   1  10   0 1.96862 2.95179   6
  -1  10   0 8.98212 2.23590   2
   2 -10   0 7.84787 2.12628   4
  -2 -10   0 9.20336 1.78091   3
  -2 -10   0 10.3195  1.9156   5
   2 -10   0 9.93945 2.52284   2
   2  10   0 10.0150  3.8276   6
   2  10   0 15.3771  2.7974   2
  -2  10   0 10.6324  2.4956   2
  -2  10   0 11.2008  1.9395   3
   2  10   0 12.2201  1.7856   3
  -2  10   0 9.93997 3.96951   6
  -2  10   0 12.7480  1.9621   5
   2  10   0 12.3799  1.8297   5
   3 -10   0 144.762  17.196   6
   3 -10   0 136.780  12.001   2
  -3 -10   0 165.601  10.813   5
   3 -10   0 167.571  11.556   4
  -3 -10   0 156.351  10.631   3
   3  10   0 163.197  12.001   2
  -3  10   0 151.291  12.102   2
   3  10   0 139.331  16.793   6
  -3  10   0 155.459  10.818   5
  -3  10   0 158.646  17.451   6
  -3  10   0 152.497  10.678   3
   4 -10   0 264.525  27.330   6
   4 -10   0 245.091  18.097   4
  -4 -10   0 257.542  17.485   5
   4 -10   0 272.485  19.406   2
  -4 -10   0 256.497  17.207   3
   4  10   0 272.866  26.826   6
  -4  10   0 262.488  27.300   6
   4  10   0 238.450  18.419   4
  -4  10   0 248.986  19.228   2
  -4  10   0 271.810  17.568   5
   4  10   0 260.203  18.967   2
  -4  10   0 272.711  17.406   3
   5 -10   0 11.5767  2.9155   2
  -5 -10   0 10.5773  2.1446   3
  -5 -10   0 10.2440  2.2697   5
   5 -10   0 5.46604 2.80780   6
   5 -10   0 10.3584  2.5470   4
  -5  10   0 11.0961  2.8684   2
   5  10   0 19.0692  3.3438   2
  -5  10   0 11.1874  2.3999   5
   5  10   0 9.20505 3.56203   6
   5  10   0 12.9737  3.1168   4
  -5  10   0 10.3279  4.0455   6
  -6 -10   0 198.999  13.938   5
  -6 -10   0 195.764  13.631   3
   6 -10   0 212.519  22.046   6
   6 -10   0 194.240  14.343   4
   6 -10   0 199.842  15.415   2
   6  10   0 198.369  14.949   2
   6  10   0 193.097  21.137   6
  -6  10   0 224.870  15.780   2
  -6  10   0 181.456  21.651   6
  -6  10   0 196.631  13.952   5
   6  10   0 188.382  14.717   4
  -6  10   0 190.681  13.771   3
   7 -10   0 19.9333  3.5952   4
   7 -10   0 11.0303  4.1978   6
   7 -10   0 20.8619  4.0517   2
  -7 -10   0 21.3190  3.2881   3
  -7 -10   0 20.1726  3.3682   5
   7  10   0 26.3587  5.4902   6
   7  10   0 17.0554  3.7215   4
  -7  10   0 30.3784  4.7278   2
  -7  10   0 30.5367  4.0244   5
   7  10   0 26.7917  4.0469   2
  -7  10   0 13.1705  5.0681   6
  -7  10   0 20.2813  3.4061   3
   8 -10   0 21.3240  4.0384   4
   8 -10   0 17.1866  4.9952   6
   8 -10   0 23.3667  4.3984   2
  -8 -10   0 22.7762  3.6926   3
  -8 -10   0 21.9457  3.7272   5
  -8  10   0 24.3658  4.5621   2
  -8  10   0 20.0622  6.0335   6
  -8  10   0 29.1928  4.1280   5
   8  10   0 25.3869  4.1920   2
   8  10   0 24.0421  4.3581   4
  -8  10   0 29.5934  4.1682   3
   8  10   0 16.5603  5.0281   6
  -9 -10   0 21.2009  3.8739   5
  -9 -10   0 20.3089  3.7108   3
   9 -10   0 20.5011  4.1355   4
   9 -10   0 13.8475  4.6653   6
   9 -10   0 29.9982  5.0976   2
   9  10   0 27.0197  4.4071   2
   9  10   0 32.2751  5.1119   4
  -9  10   0 16.1077  5.9314   6
  -9  10   0 28.0670  4.2679   5
  -9  10   0 23.6401  4.1317   3
  -9  10   0 16.7629  4.1148   2
  10 -10   0 27.4649  5.0446   2
  10 -10   0 14.6418  4.8919   6
 -10 -10   0 15.7056  3.7429   5
  10 -10   0 16.6286  4.0730   4
 -10  10   0 23.4952  4.2883   3
  10  10   0 13.0319  3.4336   2
  10  10   0 14.5448  4.0155   4
 -10  10   0 16.0453  6.1196   6
 -10  10   0 14.5013  3.5162   5
  11 -10   0 4.54914 3.50683   2
 -11 -10   0 18.8759  3.9931   5
  11 -10   0 8.28974 4.36038   6
  11 -10   0 9.84453 3.83678   4
 -11  10   0 13.0283  3.4048   3
 -11  10   0 16.4976  6.2004   6
  11  10   0 13.7281  3.9787   4
 -11  10   0 16.0043  3.8083   5
  12 -10   0 -3.1259  1.9910   2
  12 -10   0 0.39146 3.67292   6
  12  10   0 6.98366 3.14253   4
 -12  10   0 0.77990 2.50282   3
 -12  10   0 9.25156 3.11547   5
  13 -10   0 10.2760  4.9785   6
  13 -10   0 5.56533 3.84116   2
 -13  10   0 22.8445  4.6508   3
 -13  10   0 24.0776  4.6302   5
  13  10   0 20.2348  4.6565   4
  14 -10   0 6.90309 4.72010   6
  14 -10   0 7.68626 4.60228   2
  14  10   0 16.8909  5.0774   4
 -14  10   0 11.0676  4.0996   5
 -14  10   0 4.52577 3.52552   3
  15 -10   0 -0.6231  3.8330   2
 -15  10   0 -0.7853  2.8452   3
 -15  10   0 -2.0511  2.5674   5
   0 -11   0 0.44692 1.08860   3
   0 -11   0 -1.0012  1.2167   4
   0 -11   0 -0.3825  1.1051   5
   0  11   0 0.47274 2.81484   6
   0  11   0 1.69783 1.40361   2
   0  11   0 0.92642 1.09236   5
   0  11   0 -0.4236  0.8596   3
   1 -11   0 7.66718 2.30830   4
  -1 -11   0 1.29159 1.75779   4
  -1  11   0 1.29602 1.05287   5
  -1  11   0 -2.5696  2.4860   6
  -1  11   0 2.30612 1.56925   2
   1  11   0 -0.4149  1.4784   2
  -1  11   0 3.72735 1.23325   3
   1  11   0 -0.8116  2.9949   6
  -2 -11   0 25.9092  4.2647   4
   2 -11   0 35.0140  4.8688   2
   2 -11   0 28.6582  4.1228   4
   2  11   0 39.4338  4.9873   2
  -2  11   0 34.9708  6.7748   6
   2  11   0 20.4432  5.4490   6
  -2  11   0 32.4914  3.5338   5
  -2  11   0 37.4974  3.6843   3
  -2  11   0 32.2981  4.5553   2
   3 -11   0 33.9115  4.7566   2
   3 -11   0 17.4349  4.8468   6
   3 -11   0 21.8769  3.7480   4
  -3  11   0 31.8443  4.6384   2
   3  11   0 25.3904  4.0437   2
  -3  11   0 21.0040  5.4020   6
  -3  11   0 26.0389  3.2211   3
  -3  11   0 28.8351  3.3702   5
   3  11   0 22.0012  5.4607   6
   4 -11   0 14.4189  2.8357   4
   4 -11   0 14.3053  3.1591   2
   4 -11   0 9.06736 3.66519   6
  -4  11   0 10.9938  2.9291   2
  -4  11   0 8.17629 2.10386   5
   4  11   0 13.4764  4.0574   6
  -4  11   0 7.19082 3.81046   6
   4  11   0 12.1936  2.7860   2
  -4  11   0 12.0618  2.3695   3
   5 -11   0 8.96320 3.63393   6
   5 -11   0 11.4996  3.0070   2
   5 -11   0 9.32909 2.71747   4
   5  11   0 11.0664  2.8789   4
   5  11   0 9.05489 4.16265   6
  -5  11   0 17.1339  2.8344   5
  -5  11   0 10.1749  2.7633   2
   5  11   0 9.61795 2.62702   2
  -5  11   0 11.4214  4.3403   6
  -5  11   0 14.9572  2.7047   3
   6 -11   0 2.02137 2.14358   4
   6 -11   0 2.93484 2.95585   6
   6 -11   0 5.34672 2.44986   2
  -6  11   0 1.78294 1.66257   5
   6  11   0 5.46743 3.62864   6
   6  11   0 3.90496 2.10639   2
  -6  11   0 2.47146 3.27987   6
  -6  11   0 5.14045 2.27967   2
  -6  11   0 3.67049 1.85202   3
   6  11   0 4.70314 2.17673   4
   7 -11   0 21.2153  5.5398   6
   7 -11   0 14.7298  3.7578   2
   7 -11   0 25.2598  4.0757   4
  -7  11   0 12.1465  2.9830   3
  -7  11   0 17.6225  5.4041   6
   7  11   0 27.2386  4.5211   4
  -7  11   0 18.7388  4.0734   2
  -7  11   0 20.7508  3.5644   5
   7  11   0 15.1321  4.8461   6
   7  11   0 21.2250  3.7885   2
   8 -11   0 2.59399 3.18612   6
   8 -11   0 5.14969 2.84835   4
   8 -11   0 12.1569  3.6672   2
  -8  11   0 8.67266 2.56580   3
  -8  11   0 8.34959 3.12540   2
  -8  11   0 9.34990 4.51307   6
   8  11   0 9.59631 2.96510   2
   8  11   0 3.86203 3.36890   6
   8  11   0 4.94951 2.74633   4
   9 -11   0 -1.8638  2.2764   4
   9 -11   0 -3.1053  1.6060   2
   9 -11   0 1.02183 3.00254   6
   9  11   0 1.73138 2.44618   4
  -9  11   0 -2.6096  2.9390   6
   9  11   0 -0.6745  1.7787   2
  -9  11   0 -1.2204  2.0373   2
  -9  11   0 -1.1848  1.8052   5
  -9  11   0 3.72370 2.06702   3
  10 -11   0 8.64941 3.29819   2
  10 -11   0 2.27851 3.39831   6
  10 -11   0 4.89116 3.17749   4
 -10  11   0 6.27592 2.91689   3
  10  11   0 1.01227 2.37468   4
  10  11   0 12.8155  3.3956   2
 -10  11   0 10.1577  2.9459   5
 -10  11   0 2.87851 4.43946   6
  11 -11   0 0.77578 3.01901   2
  11 -11   0 1.16476 2.80043   6
  11  11   0 -1.9876  1.9107   4
 -11  11   0 -0.9852  4.3338   6
 -11  11   0 -0.8860  1.8547   5
 -11  11   0 -1.9881  2.1316   3
  12 -11   0 8.10271 3.51602   2
  12 -11   0 0.09213 3.48570   6
 -12  11   0 3.23138 2.80578   5
  12  11   0 2.69361 2.85393   4
 -12  11   0 3.07627 3.07818   3
  13 -11   0 -0.3065  3.5056   2
  13 -11   0 -2.5963  2.5976   6
  13  11   0 1.11162 3.32141   4
 -13  11   0 -1.5064  2.6590   3
 -13  11   0 3.30828 3.22280   5
  14 -11   0 -1.8705  3.5358   2
  14 -11   0 0.11213 4.20233   6
  14  11   0 1.85938 3.76701   4
 -14  11   0 -0.4889  3.0443   5
 -14  11   0 -1.1574  2.8703   3
   0 -12   0 83.1080  7.3360   4
   0  12   0 93.1976  7.6624   2
   0  12   0 64.4163 10.6908   6
  -1 -12   0 180.662  14.033   4
   1 -12   0 198.447  13.954   4
  -1  12   0 174.243  20.317   6
   1  12   0 185.627  14.359   2
  -1  12   0 177.605  14.356   2
   1  12   0 192.348  20.593   6
  -2 -12   0 16.9522  3.5499   4
   2 -12   0 12.6830  3.3205   2
   2 -12   0 14.6213  3.2707   4
   2  12   0 16.8472  3.3050   2
  -2  12   0 11.4156  4.2616   6
  -2  12   0 13.7944  3.1871   2
   3 -12   0 6.14218 2.34745   4
   3 -12   0 7.43583 3.30002   6
   3 -12   0 5.55399 2.54259   2
   3  12   0 5.18617 2.26491   2
  -3  12   0 4.02052 2.09410   2
  -3  12   0 6.06253 4.14156   6
   3  12   0 3.54956 3.03336   6
   4 -12   0 19.0971  5.3607   6
   4 -12   0 27.5705  4.6011   2
   4 -12   0 25.3060  3.9102   4
  -4  12   0 28.0582  4.6235   2
  -4  12   0 19.5160  5.4092   6
   4  12   0 31.4076  4.7012   2
   4  12   0 21.0585  5.4143   6
   5 -12   0 34.0185  4.7027   4
   5 -12   0 32.1853  6.8240   6
   5 -12   0 29.6942  4.8525   2
  -5  12   0 34.1542  5.2215   2
  -5  12   0 35.4982  4.3252   3
   5  12   0 32.5721  5.0583   4
  -5  12   0 25.0114  6.3731   6
   5  12   0 35.8805  5.0868   2
   5  12   0 27.4472  6.3457   6
   6 -12   0 3.23027 2.85911   6
   6 -12   0 2.26587 2.24346   4
   6 -12   0 2.26179 2.15259   2
   6  12   0 1.31222 3.37090   6
   6  12   0 8.00200 2.63687   2
  -6  12   0 3.41542 3.55064   6
  -6  12   0 1.40428 2.01988   2
   6  12   0 3.09386 2.03892   4
  -6  12   0 7.23534 2.22774   3
  -6  12   0 3.06912 2.03203   5
   7 -12   0 30.0883  4.9421   4
   7 -12   0 42.1907  6.0057   2
   7 -12   0 30.2715  7.0787   6
  -7  12   0 39.7787  4.9544   3
   7  12   0 36.3177  5.7581   4
   7  12   0 47.4490  6.1030   2
  -7  12   0 41.1035  6.2393   2
  -7  12   0 40.4567  5.1333   5
  -7  12   0 26.4280  7.0853   6
   7  12   0 34.7331  7.1087   6
   8 -12   0 17.1041  5.2046   6
   8 -12   0 9.05033 3.48521   2
   8 -12   0 7.29323 3.13722   4
   8  12   0 15.7960  3.8213   4
  -8  12   0 14.6173  4.1006   2
  -8  12   0 13.3759  3.2763   5
  -8  12   0 10.0335  4.9305   6
   8  12   0 13.3387  3.4044   2
  -8  12   0 8.08184 2.94349   3
   9 -12   0 30.4422  7.1070   6
   9 -12   0 42.2929  5.9914   4
   9 -12   0 37.4553  6.2079   2
  -9  12   0 34.1443  5.0734   3
  -9  12   0 31.0368  7.8289   6
  -9  12   0 36.1592  6.2491   2
  -9  12   0 39.3809  5.5617   5
   9  12   0 40.4811  5.9593   2
   9  12   0 46.0324  6.3682   4
  10 -12   0 4.99341 3.52116   4
  10 -12   0 5.16747 3.60383   6
  10 -12   0 5.19444 3.01923   2
 -10  12   0 3.19638 2.80105   5
  10  12   0 11.7073  3.5584   2
 -10  12   0 7.70221 5.16192   6
 -10  12   0 8.20163 3.00607   3
  10  12   0 5.68563 3.14796   4
  11 -12   0 1.59211 2.90095   2
  11 -12   0 0.57843 3.54379   6
 -11  12   0 -0.3177  2.4314   3
 -11  12   0 10.2771  3.2204   5
 -11  12   0 5.02634 4.61205   6
  11  12   0 4.00819 2.96599   4
  12 -12   0 1.09295 3.51587   6
  12 -12   0 2.37883 3.47813   2
  12  12   0 8.56866 3.55834   4
 -12  12   0 4.14448 2.78264   3
 -12  12   0 -0.6477  2.8294   5
  13 -12   0 -0.4644  3.4147   2
  13 -12   0 -0.3066  3.8700   6
 -13  12   0 2.78039 3.20757   3
 -13  12   0 -2.4284  2.4902   5
  13  12   0 9.01164 3.53684   4
  14 -12   0 -2.0874  3.9470   6
 -14  12   0 -0.0701  3.1571   5
 -14  12   0 0.80354 3.38820   3
   0 -13   0 -0.2951  2.0892   4
   0  13   0 -1.4073  2.9442   6
   0  13   0 4.37906 2.33080   2
   1 -13   0 10.2553  2.9478   4
   1 -13   0 5.28624 2.55268   2
  -1 -13   0 9.54364 2.97520   4
   1  13   0 14.1856  3.3412   2
   1  13   0 2.98045 3.70632   6
  -1  13   0 6.07726 3.88769   6
  -1  13   0 7.79421 2.56514   2
   2 -13   0 9.46476 4.13103   6
   2 -13   0 18.3317  3.6848   4
   2 -13   0 12.4415  3.5071   2
  -2 -13   0 16.0963  3.9930   4
  -2  13   0 12.8818  3.2568   2
  -2  13   0 15.8028  4.9277   6
   2  13   0 19.5666  3.9120   2
   2  13   0 16.0053  4.6787   6
   3 -13   0 -0.7300  1.4499   2
   3 -13   0 0.19861 2.12414   6
   3 -13   0 -0.9355  1.9371   4
  -3 -13   0 -1.9328  1.6144   4
   3  13   0 -2.7098  2.1392   6
  -3  13   0 -1.8221  1.3446   2
   3  13   0 1.26264 1.81546   2
  -3  13   0 -2.0425  2.4627   6
   4 -13   0 11.9004  3.0564   4
   4 -13   0 3.10438 3.12144   6
   4 -13   0 10.1895  3.1433   2
   4  13   0 9.20176 3.97211   6
   4  13   0 9.18940 2.79501   2
  -4  13   0 13.8863  4.6712   6
  -4  13   0 13.2050  3.4678   2
   5 -13   0 1.48769 2.07695   2
   5 -13   0 -0.5316  2.5283   6
   5 -13   0 5.62601 2.56169   4
  -5  13   0 -0.4644  1.6896   2
   5  13   0 3.59313 2.34843   2
   5  13   0 -0.8766  3.1124   6
  -5  13   0 1.87015 3.15081   6
   6 -13   0 -1.8194  2.1333   4
   6 -13   0 1.01046 2.39951   6
   6 -13   0 3.86742 2.26661   2
  -6  13   0 2.86428 3.68819   6
   6  13   0 2.28747 3.31280   6
  -6  13   0 1.31400 2.46281   2
   6  13   0 4.12668 2.34930   2
   6  13   0 -0.7571  1.8008   4
   7 -13   0 9.57872 3.49781   2
   7 -13   0 12.0583  3.4213   4
   7 -13   0 4.18615 3.39121   6
   7  13   0 7.50940 3.06304   2
   7  13   0 12.6578  4.6254   6
  -7  13   0 10.7443  4.7629   6
   7  13   0 8.61752 3.30037   4
  -7  13   0 6.57676 3.40930   2
   8 -13   0 -1.8772  2.1610   6
   8 -13   0 0.69345 2.30385   2
   8 -13   0 -0.6128  1.9416   4
   8  13   0 2.02682 2.27623   2
   8  13   0 0.11073 2.34380   4
  -8  13   0 1.40720 2.80196   2
  -8  13   0 -2.5380  2.6328   6
   9 -13   0 -0.9610  2.7084   4
   9 -13   0 2.61319 2.52925   2
   9 -13   0 2.37760 3.30995   6
  -9  13   0 1.05866 2.98667   2
   9  13   0 6.33601 2.94690   4
   9  13   0 4.34249 2.66687   2
  -9  13   0 3.94493 4.63540   6
  10 -13   0 10.5292  4.6598   6
  10 -13   0 10.3500  3.7244   2
 -10  13   0 3.81005 4.45531   6
  10  13   0 2.93701 2.68061   4
 -10  13   0 1.82476 2.96895   2
  11 -13   0 -0.9664  3.0046   6
  11 -13   0 -0.6310  2.9810   2
 -11  13   0 -1.3356  4.7698   6
  11  13   0 -2.2491  2.1934   4
  12 -13   0 -1.3354  2.9479   2
  12 -13   0 -1.4649  3.3267   6
  12  13   0 -0.7510  3.3212   4
 -12  13   0 0.68891 4.57456   6
  13 -13   0 -1.3306  3.5441   2
  13 -13   0 -0.2946  3.3780   6
  13  13   0 2.19097 3.50126   4
   0 -14   0 32.3436  4.9116   4
   0  14   0 25.6165  4.5769   2
   0  14   0 20.0858  5.7531   6
   1 -14   0 56.1460  7.5607   2
  -1 -14   0 99.2754  9.3284   4
   1 -14   0 84.0023  8.4149   4
   1  14   0 66.8249  8.0076   2
  -1  14   0 63.7596 10.8101   6
  -1  14   0 65.6943  8.1461   2
   1  14   0 70.7628 10.6464   6
   2 -14   0 5.50226 2.44360   2
   2 -14   0 -1.5909  2.0126   6
  -2 -14   0 -2.3518  1.5728   4
   2 -14   0 -1.7888  1.6310   4
  -2  14   0 0.73677 2.14733   2
  -2  14   0 0.21414 2.81830   6
   2  14   0 -1.2548  1.4564   2
   2  14   0 -0.8589  3.4630   6
   3 -14   0 9.54945 3.25465   2
   3 -14   0 11.0195  4.2516   6
  -3 -14   0 10.2751  3.2171   4
   3 -14   0 8.22812 2.76335   4
   3  14   0 4.88317 3.93847   6
  -3  14   0 13.5038  3.5046   2
  -3  14   0 3.43655 3.61673   6
   3  14   0 7.67606 2.79338   2
   4 -14   0 43.9185  8.6068   6
   4 -14   0 57.7003  6.6160   4
   4 -14   0 60.8582  7.3425   2
  -4  14   0 53.1321  7.1090   2
   4  14   0 37.7904  7.9811   6
  -4  14   0 47.1582  8.6225   6
   4  14   0 49.9620  6.6438   2
   5 -14   0 25.3444  4.5684   4
   5 -14   0 25.7344  4.9376   2
   5 -14   0 21.8669  6.1633   6
  -5  14   0 18.6289  5.8168   6
  -5  14   0 27.1103  4.9516   2
   5  14   0 22.6437  4.5282   2
   6 -14   0 16.6808  5.4052   6
   6 -14   0 27.3555  4.7036   4
   6 -14   0 22.2425  4.6040   2
   6  14   0 25.9395  4.9677   2
   6  14   0 20.6945  5.9254   6
  -6  14   0 31.2309  5.3292   2
  -6  14   0 25.5706  6.7161   6
   7 -14   0 5.78390 3.89412   6
   7 -14   0 1.37551 2.50413   2
   7 -14   0 -0.2351  2.5892   4
  -7  14   0 -0.2141  2.4592   2
   7  14   0 4.40128 2.64787   4
   7  14   0 1.11336 2.43464   2
  -7  14   0 1.60092 3.36976   6
   7  14   0 0.77980 3.39717   6
   8 -14   0 0.22398 2.69056   2
   8 -14   0 4.10831 3.10846   4
   8 -14   0 1.91413 3.09806   6
  -8  14   0 3.22644 4.75647   6
   8  14   0 3.46077 2.70215   2
  -8  14   0 2.88275 2.77233   2
   8  14   0 2.78687 2.55326   4
   9 -14   0 8.90935 3.58404   4
   9 -14   0 19.7654  4.7056   2
   9 -14   0 21.2419  6.4764   6
   9  14   0 10.1413  3.8433   4
  -9  14   0 24.3969  7.1686   6
   9  14   0 24.6543  5.0053   2
  -9  14   0 20.6388  5.1989   2
  10 -14   0 2.08164 3.35589   6
  10 -14   0 0.14595 2.60862   2
 -10  14   0 3.39108 3.29362   2
  10  14   0 7.48030 3.95946   4
 -10  14   0 13.3873  6.2995   6
  11 -14   0 0.33898 3.32614   2
  11 -14   0 3.43467 4.22059   6
 -11  14   0 5.50787 5.62761   6
  11  14   0 2.47244 3.41502   4
  12 -14   0 -3.4765  3.4021   2
  12 -14   0 -0.8793  3.6991   6
 -12  14   0 -6.5346  3.5412   6
  12  14   0 -1.4362  3.2876   4
   0 -15   0 0.48718 2.21757   4
   0  15   0 -3.1300  2.3160   6
   0  15   0 -0.6613  1.7527   2
   1 -15   0 1.88254 2.59914   2
   1 -15   0 -0.0348  1.9975   4
  -1 -15   0 3.32785 2.94374   4
   1  15   0 0.03908 2.89979   6
  -1  15   0 -0.9708  1.9631   2
  -1  15   0 -3.4869  2.2736   6
   1  15   0 0.51299 1.91427   2
   2 -15   0 1.72417 2.17879   2
   2 -15   0 -0.6626  2.4504   6
  -2 -15   0 -1.5894  2.4951   4
   2 -15   0 1.65183 2.22759   4
   2  15   0 0.17281 2.16422   2
   2  15   0 1.41790 3.18524   6
  -2  15   0 1.52307 3.10728   6
  -2  15   0 -1.8077  1.7792   2
   3 -15   0 3.13349 2.49460   2
  -3 -15   0 -1.2856  2.0171   4
   3 -15   0 0.72343 2.41274   4
   3 -15   0 -0.5395  2.5987   6
   3  15   0 1.97539 2.50012   2
  -3  15   0 4.41420 3.95784   6
   3  15   0 -0.0040  3.4206   6
  -3  15   0 -1.1812  2.0516   2
   4 -15   0 1.68770 2.22892   4
  -4 -15   0 2.84827 2.70651   4
   4 -15   0 1.58816 2.13587   2
   4 -15   0 -0.2888  2.9935   6
  -4  15   0 3.69432 3.54025   6
   4  15   0 -0.3146  2.8948   6
   4  15   0 0.01900 2.26721   2
  -4  15   0 0.79731 2.31787   2
   5 -15   0 -0.2462  2.5432   6
   5 -15   0 5.37669 3.12347   4
   5 -15   0 1.33510 2.45673   2
   5  15   0 2.59141 3.34785   6
   5  15   0 3.95961 2.72004   2
  -5  15   0 4.40185 2.67839   2
  -5  15   0 -0.0771  3.0307   6
   6 -15   0 3.25390 2.69547   4
   6 -15   0 0.40243 2.60941   6
   6 -15   0 6.08459 3.08712   2
   6  15   0 0.29150 2.95644   6
  -6  15   0 2.33527 2.48740   2
   6  15   0 8.55455 3.55283   2
  -6  15   0 4.66529 4.33403   6
   7 -15   0 2.00134 3.56073   6
   7 -15   0 4.24704 3.15430   2
   7 -15   0 -3.0156  2.4464   4
  -7  15   0 0.21440 3.17004   6
   7  15   0 3.91851 2.85556   2
  -7  15   0 6.60281 3.67391   2
   8 -15   0 0.39596 2.26483   2
   8 -15   0 -0.7092  2.6270   6
   8 -15   0 4.80419 3.26602   4
  -8  15   0 -1.8258  3.4476   6
   8  15   0 -1.1740  2.4005   2
   9 -15   0 2.33743 3.07768   2
   9 -15   0 0.02555 2.90322   6
   9  15   0 -2.0472  2.2264   4
  -9  15   0 1.16317 2.65438   2
  -9  15   0 -1.8105  4.1076   6
  10 -15   0 -0.2273  2.6108   2
  10 -15   0 3.26411 3.75978   6
  10  15   0 4.51214 3.34056   4
 -10  15   0 0.99770 3.68149   2
 -10  15   0 2.80610 4.25669   6
  11 -15   0 0.41277 3.33641   2
  11 -15   0 -2.7151  3.4130   6
  11  15   0 1.38575 3.76218   4
 -11  15   0 2.82993 4.84522   6
  12 -15   0 1.70143 3.91055   6
 -12  15   0 -0.1486  5.9092   6
   0 -16   0 33.0123  5.6662   4
   0 -16   0 22.5096  4.9319   2
   0  16   0 22.9646  6.6492   6
   0  16   0 30.5624  5.4476   2
   1 -16   0 5.54982 3.06361   2
   1 -16   0 1.50980 2.53029   4
  -1 -16   0 3.58882 3.35251   4
   1  16   0 0.28437 2.99960   6
  -1  16   0 0.25685 3.47508   6
   1  16   0 2.59238 2.59299   2
  -1  16   0 1.65360 2.27810   2
   2 -16   0 2.76484 2.58533   4
   2 -16   0 2.66368 3.06220   2
   2 -16   0 4.09125 3.32311   6
  -2 -16   0 2.56068 2.81105   4
   2  16   0 5.70824 2.85361   2
   2  16   0 3.03844 3.28658   6
  -2  16   0 1.37176 2.65640   2
  -2  16   0 -0.5151  2.9575   6
   3 -16   0 44.5052  9.5275   6
  -3 -16   0 54.3526  7.5435   4
   3 -16   0 66.6618  7.5584   4
   3 -16   0 54.3943  7.4978   2
  -3  16   0 37.7058  8.7294   6
  -3  16   0 69.8284  8.3711   2
   3  16   0 61.1059 10.1463   6
   3  16   0 67.3912  8.2104   2
   4 -16   0 16.9774  4.1779   4
   4 -16   0 22.5876  6.3438   6
  -4 -16   0 26.8408  5.3697   4
   4 -16   0 21.9505  5.0038   2
  -4  16   0 22.0437  6.7167   6
   4  16   0 23.3823  6.3988   6
   4  16   0 28.1725  5.4246   2
  -4  16   0 25.1763  5.1653   2
  -5 -16   0 12.2187  4.1224   4
   5 -16   0 7.62336 3.31696   2
   5 -16   0 8.36328 3.63605   4
   5 -16   0 4.64901 3.74928   6
   5  16   0 8.88556 4.44552   6
  -5  16   0 1.12678 4.18113   6
  -5  16   0 4.23234 3.11550   2
   5  16   0 6.31001 3.29161   2
   6 -16   0 14.2270  4.2162   4
   6 -16   0 12.9259  4.0768   2
   6 -16   0 20.7710  6.2767   6
  -6  16   0 14.4159  5.4771   6
  -6  16   0 19.8432  4.7001   2
   6  16   0 21.0822  6.1959   6
   7 -16   0 22.5204  6.8266   6
   7 -16   0 22.0408  4.7026   4
  -7  16   0 29.3659  6.2246   2
  -7  16   0 14.5261  5.8982   6
   7  16   0 32.5592  5.9844   2
   8 -16   0 -0.7593  3.1316   6
   8 -16   0 0.34374 2.40277   2
  -8  16   0 -0.1785  2.4588   2
  -8  16   0 0.33431 3.82158   6
   8  16   0 0.47317 2.78438   2
   9 -16   0 -1.5123  2.2353   2
   9 -16   0 -3.3432  2.6112   6
  -9  16   0 3.53359 3.87712   2
  -9  16   0 -2.3562  3.3961   6
  10 -16   0 0.97806 3.44580   6
  10 -16   0 4.84305 3.89470   2
 -10  16   0 -1.2683  4.5208   6
 -10  16   0 2.41554 3.76352   2
  11 -16   0 6.35419 4.71079   6
 -11  16   0 4.67704 5.87699   6
   0 -17   0 2.59291 2.37705   2
   0 -17   0 -2.9257  2.5115   4
   0  17   0 -0.9127  3.0629   6
   0  17   0 -2.5994  2.2354   2
   1 -17   0 5.57922 3.97012   6
   1 -17   0 2.30393 2.84889   4
   1 -17   0 0.55732 2.30330   2
  -1 -17   0 -1.1461  3.0435   4
   1  17   0 -2.2304  1.8990   2
   1  17   0 0.36238 3.30489   6
  -1  17   0 3.51169 2.95590   2
  -1  17   0 -0.0785  3.1522   6
  -2 -17   0 -0.2933  2.5048   4
   2 -17   0 1.02902 2.46063   4
   2 -17   0 2.41036 3.43129   6
   2 -17   0 3.82051 3.37662   2
   2  17   0 -0.9565  3.9154   6
  -2  17   0 0.06809 3.65625   6
   2  17   0 0.90599 2.57688   2
  -2  17   0 2.60913 2.85567   2
  -3 -17   0 3.99437 3.13983   4
   3 -17   0 -2.6634  1.8983   2
   3 -17   0 1.18754 2.70932   4
   3 -17   0 1.59243 3.09466   6
  -3  17   0 0.45074 3.49595   6
  -3  17   0 -1.8418  2.0632   2
   3  17   0 3.68300 4.12203   6
   3  17   0 -1.9225  2.3510   2
  -4 -17   0 2.82678 3.06210   4
   4 -17   0 -0.5767  2.4112   2
   4 -17   0 1.34237 2.84880   6
   4 -17   0 -1.0720  2.7931   4
  -4  17   0 0.69944 2.80861   2
   4  17   0 1.25166 3.97248   6
   4  17   0 0.07856 2.05187   2
  -4  17   0 -1.7501  2.8753   6
   5 -17   0 6.47194 3.69148   2
   5 -17   0 5.98448 4.23665   6
   5 -17   0 0.37218 3.04184   4
  -5 -17   0 1.51219 2.91747   4
  -5  17   0 6.36809 4.35598   6
   5  17   0 5.15676 3.55682   2
   5  17   0 2.54956 4.08958   6
  -5  17   0 5.14711 3.25656   2
   6 -17   0 3.33995 3.69789   4
  -6 -17   0 -2.0913  2.6398   4
   6 -17   0 3.39648 3.09491   2
   6 -17   0 -0.5656  2.7985   6
   6  17   0 1.73723 2.77564   2
  -6  17   0 1.25547 2.96719   2
  -6  17   0 0.60462 3.29119   6
   7 -17   0 2.89718 3.59453   6
   7 -17   0 1.08999 3.14753   2
   7 -17   0 0.19255 3.38651   4
   7  17   0 8.62354 3.92654   2
  -7  17   0 -0.1504  3.2231   2
  -7  17   0 1.00615 3.98105   6
   8 -17   0 -0.1501  3.0442   2
   8 -17   0 -2.7910  2.7108   6
  -8  17   0 1.85281 2.97851   2
  -8  17   0 0.93765 4.09068   6
   9 -17   0 -1.7909  3.1134   6
   9 -17   0 -0.7339  2.8603   2
  -9  17   0 4.83783 4.07709   2
  -9  17   0 -2.0985  3.6034   6
 -10  17   0 3.53307 5.01214   6
   0 -18   0 0.52179 3.12157   2
   0 -18   0 3.86312 3.23694   4
   0  18   0 -0.2065  2.2404   2
   0  18   0 0.82849 3.45270   6
   1 -18   0 3.34068 3.86879   6
   1 -18   0 8.84157 3.97735   2
   1 -18   0 0.15513 2.86326   4
  -1 -18   0 0.37740 2.38190   2
  -1 -18   0 -0.4199  3.3098   4
  -1  18   0 -0.0660  4.0206   6
   1  18   0 -1.0526  3.0708   6
   1  18   0 3.14261 2.80323   2
  -1  18   0 6.20342 3.23811   2
   2 -18   0 9.82393 4.26315   4
   2 -18   0 4.06407 4.25685   6
  -2 -18   0 10.8398  4.2122   4
   2 -18   0 14.5227  4.5706   2
   2  18   0 18.0599  5.9221   6
  -2  18   0 6.94344 4.58962   6
  -2  18   0 13.8708  4.2616   2
   2  18   0 13.6529  4.3708   2
   3 -18   0 8.86717 3.69942   2
   3 -18   0 13.1209  4.0770   4
  -3 -18   0 12.7414  4.3000   4
   3 -18   0 10.6469  4.7655   6
   3  18   0 10.8297  3.7659   2
  -3  18   0 12.1268  5.5354   6
   3  18   0 9.23845 5.18200   6
  -3  18   0 5.95282 3.37933   2
   4 -18   0 37.1554  8.6391   6
  -4 -18   0 54.3116  7.8675   4
   4 -18   0 35.2822  6.4790   2
  -4  18   0 54.7599  8.1498   2
   4  18   0 45.7353  7.6740   2
   4  18   0 30.4131  7.7176   6
  -4  18   0 40.9902  8.9040   6
   5 -18   0 0.64829 2.80245   2
   5 -18   0 5.22731 3.29951   4
   5 -18   0 0.38417 3.78960   6
  -5 -18   0 2.80744 3.50284   4
  -5  18   0 -0.5119  2.8684   2
   5  18   0 1.92029 4.23234   6
  -5  18   0 1.30535 3.78695   6
   5  18   0 0.13206 3.11403   2
   6 -18   0 9.95879 4.39162   2
  -6 -18   0 10.2509  4.5183   4
   6 -18   0 7.40182 4.11053   4
   6 -18   0 11.2940  5.6369   6
  -6  18   0 9.28538 5.59840   6
   6  18   0 17.2578  4.9367   2
  -6  18   0 22.2878  5.7869   2
  -7 -18   0 8.66519 4.24298   4
   7 -18   0 2.27470 4.05939   2
   7 -18   0 2.60401 3.80138   6
  -7  18   0 6.90435 4.05973   2
   7  18   0 5.17644 3.36970   2
  -7  18   0 2.24289 4.86126   6
   8 -18   0 -1.5503  3.0526   2
   8 -18   0 0.86739 3.39672   6
  -8  18   0 -1.2367  3.1064   2
  -8  18   0 3.02296 5.30538   6
   0 -19   0 -2.1583  3.0638   2
   0 -19   0 -0.0574  3.0749   4
   0 -19   0 0.99411 4.08529   6
   0  19   0 0.94102 3.77113   6
   0  19   0 0.03926 2.68563   2
   1 -19   0 1.79679 4.34559   6
  -1 -19   0 -3.6316  2.9477   4
  -1 -19   0 1.30463 2.71906   2
   1 -19   0 3.74956 3.19356   2
   1 -19   0 5.59402 4.22369   4
   1  19   0 2.29069 3.02222   2
  -1  19   0 -3.0026  3.0264   6
  -1  19   0 1.08683 3.15150   2
   1  19   0 0.54048 3.55738   6
   2 -19   0 6.88571 4.60224   6
   2 -19   0 4.64272 3.25720   2
   2 -19   0 -0.9231  3.3933   4
  -2 -19   0 5.93516 3.99731   4
   2  19   0 4.33261 3.73270   2
   2  19   0 3.87312 4.26012   6
  -2  19   0 0.01921 3.45402   6
  -2  19   0 1.43303 3.40537   2
   3 -19   0 -0.1093  3.7971   6
   3 -19   0 2.23732 3.09076   2
   3 -19   0 -1.1768  2.8018   4
  -3 -19   0 0.35621 3.76490   4
   3  19   0 -0.0801  3.2829   2
  -3  19   0 -1.0049  3.0808   2
  -3  19   0 -2.1620  3.8826   6
   3  19   0 -0.4722  3.6152   6
   4 -19   0 -3.2988  2.3245   2
   4 -19   0 -0.8861  3.3015   4
   4 -19   0 1.36166 3.79019   6
  -4 -19   0 1.11885 3.34392   4
  -4  19   0 -1.8590  3.0674   6
   4  19   0 2.07227 4.35615   6
   4  19   0 5.82561 3.65582   2
  -4  19   0 -0.9417  3.1369   2
  -5 -19   0 -2.6094  3.0039   4
   5 -19   0 -0.5618  3.5900   4
   5 -19   0 -0.2326  4.0613   6
   5 -19   0 1.24918 3.19985   2
   5  19   0 2.26338 4.24370   6
  -5  19   0 -2.9889  2.9680   2
  -5  19   0 -0.3863  4.1125   6
   5  19   0 0.18198 3.28494   2
   6 -19   0 2.73378 4.30149   6
   6 -19   0 -2.9189  2.6391   2
  -6 -19   0 -0.5117  2.9778   4
  -6  19   0 0.41338 4.02942   6
   6  19   0 3.64088 3.67109   2
  -6  19   0 -1.0554  3.1466   2
   7 -19   0 0.56268 4.14343   6
  -7 -19   0 0.74080 3.34762   4
   7 -19   0 2.38856 3.50242   2
  -7  19   0 0.49914 4.16477   6
   0 -20   0 3.27638 4.67980   6
   0 -20   0 3.00570 3.53228   4
   0 -20   0 6.94245 4.00938   2
   0  20   0 -0.4292  4.2552   6
   0  20   0 0.50169 3.22235   2
  -1 -20   0 39.9415  7.4589   2
   1 -20   0 45.7837  7.6933   2
   1 -20   0 25.6739  7.6473   6
   1 -20   0 40.1841  7.1738   4
  -1 -20   0 35.5346  6.8584   4
   1  20   0 18.7456  7.0095   6
   1  20   0 28.4854  6.0900   2
  -1  20   0 24.6611  7.9583   6
  -1  20   0 32.0635  6.3158   2
   2 -20   0 1.98052 4.36962   6
   2 -20   0 3.30452 3.72392   4
  -2 -20   0 1.80282 3.88459   4
   2 -20   0 3.06026 3.82808   2
  -2 -20   0 2.05790 3.54928   2
  -2  20   0 2.25120 3.63052   2
   2  20   0 6.08095 3.37520   2
   2  20   0 -1.2343  3.4527   6
  -2  20   0 -2.6506  3.6476   6
  -3 -20   0 7.70186 4.24827   4
   3 -20   0 11.6509  5.9691   6
   3 -20   0 14.8432  4.7128   2
   3 -20   0 11.2810  4.5100   4
   3  20   0 2.18397 4.77844   6
   3  20   0 3.05417 3.89497   2
  -3  20   0 8.47027 5.50666   6
  -3  20   0 6.07095 4.36589   2
   4 -20   0 3.62792 3.74450   2
  -4 -20   0 2.08104 4.24559   4
   4 -20   0 1.62588 4.26786   6
   4 -20   0 7.51047 4.58338   4
   4  20   0 4.17065 4.58163   6
   4  20   0 -0.3749  2.8628   2
  -4  20   0 -1.2233  3.3507   2
  -4  20   0 4.90367 4.68626   6
   5 -20   0 -1.8464  4.2280   6
   5 -20   0 -0.0972  4.1335   4
   5 -20   0 1.23908 3.53386   2
  -5 -20   0 -1.8211  3.8553   4
  -5  20   0 1.74671 4.53565   6
   5  20   0 1.94335 3.38658   2
  -5  20   0 0.81077 3.48816   2
   6  20   0 1.54404 3.85132   2
   0 -21   0 3.90066 4.41991   4
   0 -21   0 -0.0068  3.4434   2
   0 -21   0 6.23658 4.89508   6
   0  21   0 -1.7617  4.4341   6
   0  21   0 -0.0106  3.4935   2
  -1 -21   0 0.99701 3.83354   2
   1 -21   0 5.03853 4.00702   4
   1 -21   0 3.39138 4.08274   2
  -1 -21   0 3.30935 4.45031   4
  -1 -21   0 6.30514 5.59747   6
   1 -21   0 1.30415 4.37066   6
  -1  21   0 -1.4247  3.3062   2
   1  21   0 -3.1688  3.4194   2
  -1  21   0 2.65139 4.95938   6
   1  21   0 3.63116 5.14894   6
  -2 -21   0 -1.6587  3.3902   4
   2 -21   0 -3.9891  3.9627   4
   2 -21   0 1.22852 4.24658   6
  -2 -21   0 5.81568 4.47043   2
   2 -21   0 3.12661 3.44898   2
   2  21   0 1.50442 5.02641   6
   2  21   0 2.52462 3.45117   2
  -2  21   0 0.01936 3.85264   6
  -3 -21   0 -1.9729  4.0161   4
   3 -21   0 0.78808 3.98552   4
   3  21   0 -0.1241  3.7935   6
   3  21   0 1.43744 3.47547   2
   4 -21   0 -2.0991  4.2057   4
   4  21   0 -2.7594  4.3321   6
   4  21   0 -2.2340  3.6003   2
  16   0  -1 2.43950 3.16181   4
 -16   0   1 -0.1286  2.8877   5
 -16   0   1 5.38928 3.75967   3
 -15   0   1 11.9514  4.1459   5
  15   0  -1 26.3601  5.4921   4
 -15   0   1 19.0098  4.8208   3
 -14   0   1 0.11268 2.32382   3
 -14   0   1 1.09080 2.69514   5
  14   0  -1 -0.7096  2.6355   4
  13   0  -1 4.43774 3.11852   2
 -13   0   1 1.48067 2.63909   3
 -13   0   1 4.14551 2.68569   5
  13   0  -1 -1.9672  1.7229   4
 -12   0   1 -1.6606  2.0844   5
 -12   0   1 1.03651 2.07781   3
  12   0  -1 -3.7066  1.9541   2
  12   0  -1 0.55467 2.19466   4
 -11   0   1 8.77097 2.69022   3
  11   0  -1 3.15245 2.25829   4
  11   0  -1 0.63611 3.68775   6
  11   0  -1 8.67266 3.08604   2
 -11   0   1 9.20164 2.81410   5
 -10   0   1 1.49428 2.22575   5
 -10   0   1 -2.4624  1.4306   3
  10   0  -1 1.18155 3.37105   6
  10   0  -1 4.09158 2.44318   2
  10   0  -1 4.05916 2.22610   4
   9   0  -1 107.877   8.435   2
  -9   0   1 88.2030  7.7580   3
   9   0  -1 98.0839  8.0219   4
   9   0  -1 100.850  11.845   6
  -9   0   1 94.5429  7.9715   5
   8   0  -1 0.21166 2.69059   6
   8   0  -1 -0.6032  1.3237   4
   8   0  -1 1.42041 1.80285   2
  -8   0   1 2.68358 1.69238   5
  -8   0   1 3.08141 1.24425   1
  -8   0   1 -0.1669  1.0647   3
  -7   0   1 287.004  19.384   5
   7   0  -1 269.821  28.339   6
   7   0  -1 271.977  19.538   4
  -7   0   1 307.838  19.222   3
   7   0  -1 297.212  20.299   2
  -7   0   1 297.180  19.405   1
  -6   0   1 0.21964 0.93498   5
  -6   0   1 -1.0649  0.7274   3
   6   0  -1 -1.3173  0.7612   2
   6   0  -1 -0.7968  0.6811   4
  -6   0   1 0.44366 0.82977   1
   6   0  -1 2.73256 2.10570   6
   5   0  -1 43.9988  4.6585   6
  -5   0   1 26.5522  3.1502   5
  -5   0   1 25.7616  2.8591   1
   5   0  -1 28.0439  3.2158   4
  -5   0   1 29.1919  3.1712   3
   5   0  -1 26.4670  3.0516   2
   4   0  -1 -0.6731  0.6612   4
   4   0  -1 -1.1083  0.5697   2
  -4   0   1 0.52977 0.48623   1
  -4   0   1 -1.1888  0.4327   5
  -4   0   1 0.18578 0.57901   3
  -3   0   1 136.278   9.764   1
   3   0  -1 152.148  10.143   2
   3   0  -1 148.819  14.177   6
  -3   0   1 147.371   9.789   5
  -3   0   1 160.845   9.714   3
   3   0  -1 136.438   9.858   4
  -2   0   1 -0.0097  0.3501   5
  -2   0   1 -0.3532  0.2785   1
   2   0  -1 -0.0256  0.3439   4
  -2   0   1 -0.6048  0.3337   3
   2   0   1 -0.0954  0.2678   4
   2   0   1 -0.0396  0.3742   2
  -2   0  -1 0.46758 0.33785   3
  -2   0  -1 0.01123 0.35484   5
   3   0   1 -0.6873  0.4546   4
  -3   0  -1 -0.0440  0.4586   3
  -3   0  -1 -0.7138  0.4853   5
   3   0   1 1.10993 0.83551   2
  -4   0  -1 0.49795 0.64059   3
   4   0   1 0.08428 0.59266   4
  -4   0  -1 -0.2908  0.4956   5
   4   0   1 -0.3739  0.6617   2
  -5   0  -1 70.2835  5.7199   5
  -5   0  -1 81.2899  5.7560   3
   5   0   1 75.5761  6.0747   2
   5   0   1 102.555   9.630   6
   5   0   1 68.2601  5.6614   4
  -6   0  -1 -0.4282  0.8400   3
   6   0   1 0.45209 1.38286   2
   6   0   1 -1.0393  0.8087   4
  -6   0  -1 -0.5844  0.6859   5
   6   0   1 5.46569 2.93243   6
   7   0   1 75.9919  9.8511   6
   7   0   1 82.9032  6.7175   2
  -7   0  -1 77.0710  6.2008   5
  -7   0  -1 74.2283  6.0689   3
   7   0   1 76.1387  6.1462   4
  -8   0  -1 2.57795 1.81931   5
   8   0   1 0.61250 1.36594   4
   8   0   1 0.82885 2.72861   6
   8   0   1 3.00053 2.02209   2
  -8   0  -1 1.99540 1.37518   3
   9   0   1 43.8332  5.4357   2
   9   0   1 40.7782  7.1953   6
  -9   0  -1 40.9173  5.0573   5
   9   0   1 46.0691  5.1894   4
  -9   0  -1 34.7016  4.6982   3
 -10   0  -1 -0.4919  1.5670   3
 -10   0  -1 0.69751 1.89683   5
  10   0   1 1.40250 2.12934   2
  10   0   1 -0.6794  2.8692   6
  10   0   1 3.15047 1.86900   4
  11   0   1 2.51541 2.24247   4
 -11   0  -1 1.97200 2.00861   5
  11   0   1 6.65905 3.18960   2
 -11   0  -1 5.40335 2.37377   3
  11   0   1 3.13084 4.23643   6
  12   0   1 -0.0253  2.4820   2
 -12   0  -1 2.41957 2.48963   3
 -12   0  -1 -1.0853  1.7136   5
  12   0   1 -3.1748  3.6309   6
  12   0   1 1.79460 2.13915   4
  13   0   1 0.37374 2.92287   2
  13   0   1 3.48675 2.19998   4
 -13   0  -1 -0.1720  2.0354   5
 -13   0  -1 1.82122 2.68492   3
 -14   0  -1 -1.0471  2.3059   3
  14   0   1 3.52621 2.68160   4
 -14   0  -1 -0.7013  2.5209   5
  14   0   1 2.53427 3.06136   2
  15   0   1 2.15819 3.43835   2
 -15   0  -1 1.98711 2.94626   5
 -15   0  -1 -3.8114  2.6376   3
 -16   0  -1 -1.6789  3.0592   3
 -16   0  -1 1.93791 3.52294   5
  17   1  -1 2.83007 3.87571   4
 -16  -1   1 -1.5117  2.7567   3
  16  -1  -1 1.00346 3.21132   4
 -16  -1   1 4.09185 3.85258   5
 -16   1   1 -1.4469  2.5628   5
  16   1  -1 -0.6531  2.6805   4
 -16   1   1 4.99918 3.81834   3
  15  -1  -1 3.62713 2.90703   4
 -15  -1   1 0.73896 2.85653   5
 -15  -1   1 3.22467 3.40137   3
 -15   1   1 4.93049 3.35821   5
  15   1  -1 2.69884 3.13362   4
 -15   1   1 -1.2858  2.1071   3
 -14  -1   1 7.28630 3.01329   3
  14  -1  -1 2.28055 2.70195   4
 -14  -1   1 2.60353 3.09271   5
 -14   1   1 1.47951 2.76811   5
  14   1  -1 9.22117 3.44788   4
 -14   1   1 4.88523 2.80812   3
 -13  -1   1 0.56520 2.18641   5
  13  -1  -1 2.49213 2.28096   4
 -13  -1   1 0.67273 2.49314   3
  13  -1  -1 1.61206 2.79163   2
  13   1  -1 -0.0439  1.8462   4
 -13   1   1 -0.0395  2.1093   3
  13   1  -1 3.33311 2.93046   2
 -13   1   1 -0.4005  2.0827   5
 -12  -1   1 0.40857 1.99873   3
 -12  -1   1 0.30349 2.20633   5
  12  -1  -1 4.49016 2.64929   4
  12  -1  -1 -0.6054  2.6319   2
  12   1  -1 0.25024 2.01998   4
  12   1  -1 6.51812 2.87836   2
 -12   1   1 2.25138 2.05487   5
 -12   1   1 3.09216 2.55275   3
  11  -1  -1 -0.9997  3.7531   6
  11  -1  -1 7.56165 3.00796   2
  11  -1  -1 5.35149 2.70215   4
 -11  -1   1 9.81091 2.82771   3
 -11  -1   1 9.12914 2.77846   5
  11   1  -1 6.09540 2.53949   4
 -11   1   1 6.17394 2.64616   3
 -11   1   1 8.57112 2.66964   5
  11   1  -1 9.45059 2.96673   2
  10  -1  -1 3.80347 2.49996   4
 -10  -1   1 8.92179 2.63019   5
 -10  -1   1 3.58693 2.50966   3
  10  -1  -1 -4.3298  3.6114   6
  10  -1  -1 6.04287 2.98522   2
  10   1  -1 4.12508 2.07409   4
 -10   1   1 2.41566 1.77333   3
 -10   1   1 4.36146 2.18063   5
  10   1  -1 -1.6590  2.9824   6
  10   1  -1 0.63964 2.33313   2
  -9  -1   1 45.1595  5.4331   3
   9  -1  -1 51.2167  5.6431   2
   9  -1  -1 59.5798  6.0028   4
  -9  -1   1 50.4872  5.6147   5
   9  -1  -1 41.0179  7.3775   6
   9   1  -1 53.5323  5.8337   4
   9   1  -1 46.0910  5.6065   2
   9   1  -1 43.9711  7.2554   6
  -9   1   1 66.2236  6.4507   5
  -9   1   1 51.4547  5.6408   3
  -8  -1   1 37.4941  4.4793   3
   8  -1  -1 44.0746  4.7880   2
  -8  -1   1 35.7361  4.4456   5
  -8  -1   1 43.4798  4.1574   1
   8  -1  -1 34.3937  4.3875   4
   8  -1  -1 34.7916  5.8727   6
  -8   1   1 34.3899  4.4115   5
   8   1  -1 34.2678  5.9226   6
   8   1  -1 28.5575  4.1704   2
  -8   1   1 44.3489  4.7293   3
   8   1  -1 43.7950  4.7357   4
  -7  -1   1 67.8208  5.4534   1
   7  -1  -1 93.7538  6.3290   4
   7  -1  -1 73.6483  6.0762   2
  -7  -1   1 73.9516  5.9429   3
  -7  -1   1 65.2866  5.7984   5
   7  -1  -1 67.1649  8.2183   6
  -7   1   1 68.3973  5.8367   5
   7   1  -1 67.8556  5.9460   4
  -7   1   1 67.0539  5.8102   3
   7   1  -1 70.1975  8.7485   6
   7   1  -1 72.9228  6.0547   2
  -7   1   1 77.0399  5.8078   1
   6  -1  -1 38.7189  4.0502   2
   6  -1  -1 35.4010  4.9308   6
   6  -1  -1 33.7154  3.9908   4
  -6  -1   1 39.9239  3.2482   1
  -6  -1   1 38.5962  4.0766   3
  -6  -1   1 39.2774  4.1317   5
   6   1  -1 40.4697  4.1083   2
   6   1  -1 41.4324  4.2242   4
  -6   1   1 37.4693  3.4108   1
  -6   1   1 36.6312  3.9968   5
   6   1  -1 36.3491  5.3661   6
  -6   1   1 39.3168  4.0093   3
  -5  -1   1 7.57614 1.32325   1
   5  -1  -1 12.2624  1.9627   4
   5  -1  -1 7.86930 1.92916   6
  -5  -1   1 9.14792 1.71543   5
   5  -1  -1 9.16970 1.69429   2
  -5  -1   1 18.6783  2.2001   3
   5   1  -1 11.1230  1.7866   4
  -5   1   1 10.9992  1.6897   1
   5   1  -1 14.9702  2.8950   6
   5   1  -1 6.82408 1.53668   2
  -5   1   1 8.93585 1.66206   5
  -5   1   1 7.59830 1.53574   3
   4  -1  -1 170.984  10.985   4
   4  -1  -1 159.269  15.780   6
  -4  -1   1 156.998  10.843   5
  -4  -1   1 163.077  10.709   1
  -4  -1   1 148.978  10.633   3
   4  -1  -1 164.821  11.274   2
   4   1  -1 153.175  10.924   4
  -4   1   1 160.628  10.674   3
  -4   1   1 152.114  10.774   5
   4   1  -1 159.208  11.195   2
  -4   1   1 166.735  10.936   1
   4   1  -1 159.876  15.909   6
  -4   1   1 168.746  16.678   6
   3  -1  -1 30.8008  3.7804   6
  -3  -1   1 33.7604  2.7462   3
   3  -1  -1 33.6924  2.7699   4
   3  -1  -1 36.1047  2.8083   2
  -3  -1   1 30.4534  2.7013   5
  -3  -1   1 32.1868  2.5019   1
   3   1  -1 35.2033  2.7326   2
  -3   1   1 30.2358  2.6797   5
  -3   1   1 37.0744  2.7547   1
   3   1  -1 35.2630  2.7931   4
  -3   1   1 31.6196  2.6378   3
   1  -1  -1 51.1939  3.6588   4
   1   1  -1 54.9627  3.6350   3
   1   1  -1 52.8860  3.6698   5
   1  -1   1 176.954  12.718   2
   1  -1   1 212.695  18.006   6
  -1   1  -1 201.978  12.007   3
  -1   1  -1 183.556  12.746   2
   1   1   1 177.688  12.724   2
  -1   1  -1 182.070  12.053   5
   3  -1   1 162.656  14.678   6
  -3  -1  -1 152.347   9.666   3
   3  -1   1 154.858  10.418   2
   3  -1   1 130.614   9.753   4
  -3  -1  -1 156.111   9.819   5
   3   1   1 142.700  10.345   2
  -3   1  -1 147.593   9.806   5
  -3   1  -1 154.139   9.720   3
   3   1   1 134.563   9.849   4
   4  -1   1 3.93421 1.57656   6
   4  -1   1 7.78412 1.46360   2
  -4  -1  -1 7.30086 1.39900   5
   4  -1   1 8.77121 1.37884   4
  -4  -1  -1 9.98583 1.46464   3
   4   1   1 7.17133 1.27120   4
  -4   1  -1 10.9052  1.5160   3
   4   1   1 8.29196 1.48537   2
   4   1   1 13.2246  3.2552   6
  -4   1  -1 7.47834 1.37171   5
   5  -1   1 -0.9694  1.2817   6
  -5  -1  -1 5.76769 1.40362   5
  -5  -1  -1 1.54486 0.90887   3
   5  -1   1 2.70991 1.01891   4
   5  -1   1 4.78082 1.28528   2
   5   1   1 2.05016 1.22137   2
  -5   1  -1 1.87448 0.95470   3
   5   1   1 4.49405 2.97244   6
   5   1   1 3.12525 1.00394   4
  -5   1  -1 1.83481 0.89388   5
   6  -1   1 76.0653  6.3363   2
   6  -1   1 67.9304  5.7770   4
  -6  -1  -1 77.0772  6.0183   5
  -6  -1  -1 80.1812  5.9930   3
   6  -1   1 90.8009  9.3364   6
   6   1   1 74.6748  6.3272   2
   6   1   1 91.3243  9.8175   6
  -6   1  -1 77.9429  5.9408   3
  -6   1  -1 77.6505  6.0200   5
   6   1   1 70.1115  5.8967   4
   7  -1   1 29.2354  3.8815   2
   7  -1   1 25.8846  5.0071   6
  -7  -1  -1 26.2788  3.4215   3
   7  -1   1 39.5656  3.9668   4
  -7  -1  -1 30.0150  3.7332   5
   7   1   1 25.3771  5.0233   6
   7   1   1 30.1004  3.6486   4
  -7   1  -1 30.2369  3.6969   5
  -7   1  -1 35.1046  3.8113   3
   7   1   1 30.4018  3.9292   2
   8  -1   1 118.663   9.790   2
  -8  -1  -1 117.390   9.068   3
   8  -1   1 119.442   9.174   4
   8  -1   1 108.903  13.957   6
  -8  -1  -1 142.436   9.468   5
   8   1   1 120.884   9.788   2
  -8   1  -1 128.188   9.334   5
   8   1   1 122.809  14.070   6
   8   1   1 113.692   9.146   4
  -8   1  -1 134.214   9.334   3
  -9  -1  -1 110.112   8.185   3
   9  -1   1 89.9531  7.8121   4
   9  -1   1 109.843   8.851   2
  -9  -1  -1 97.7364  8.0428   5
   9  -1   1 109.570  12.878   6
   9   1   1 90.9863  7.8750   4
  -9   1  -1 100.320   8.108   5
   9   1   1 90.3547 11.9606   6
   9   1   1 100.236   8.662   2
  -9   1  -1 110.515   8.234   3
  10  -1   1 8.43039 2.36751   4
 -10  -1  -1 8.42252 2.63734   5
  10  -1   1 13.5055  3.4642   2
  10  -1   1 1.97449 4.16330   6
 -10  -1  -1 11.0626  3.0194   3
 -10   1  -1 8.13311 2.66563   3
 -10   1  -1 12.2907  2.9217   5
  10   1   1 14.9817  3.0279   4
  10   1   1 15.4870  3.7177   2
  10   1   1 0.65227 3.70506   6
  11  -1   1 2.90541 4.36953   6
  11  -1   1 6.98156 2.82574   2
 -11  -1  -1 9.98200 2.86796   5
  11  -1   1 1.36779 2.10479   4
 -11  -1  -1 5.94234 2.72609   3
 -11   1  -1 6.18208 2.55911   5
  11   1   1 8.88660 2.79276   4
  11   1   1 2.08012 2.33655   2
  11   1   1 4.35055 4.23331   6
 -11   1  -1 6.10767 2.47607   3
 -12  -1  -1 -0.0249  2.1363   3
  12  -1   1 -1.5135  2.4030   2
  12  -1   1 -1.3068  2.0259   4
  12  -1   1 -9.0059  3.2151   6
 -12  -1  -1 -1.9364  1.7311   5
 -12   1  -1 1.96372 2.03938   3
  12   1   1 -0.4669  2.1094   2
  12   1   1 1.89488 2.00156   4
 -12   1  -1 0.52483 1.95967   5
  12   1   1 -1.9416  3.4707   6
 -13  -1  -1 3.82018 2.82893   3
  13  -1   1 6.56474 3.50246   2
 -13  -1  -1 7.62569 2.98887   5
  13  -1   1 5.68312 2.53773   4
 -13   1  -1 4.61556 2.60887   5
 -13   1  -1 5.22727 2.99423   3
  13   1   1 5.50147 3.25719   2
  13   1   1 3.09302 2.37787   4
 -14  -1  -1 4.88654 3.20312   3
  14  -1   1 3.03847 2.96440   4
 -14  -1  -1 3.67356 2.62652   5
  14  -1   1 0.58825 3.21866   2
  14   1   1 3.28520 3.00447   2
 -14   1  -1 5.84695 3.26065   5
 -14   1  -1 2.72946 2.63046   3
  14   1   1 1.18769 2.24414   4
 -15  -1  -1 1.06637 3.12606   3
 -15  -1  -1 4.33941 2.89707   5
  15  -1   1 4.72812 3.91126   2
 -15   1  -1 3.34372 3.05483   5
  15   1   1 10.9800  4.5966   2
  15   1   1 8.52489 3.69515   4
 -15   1  -1 1.13331 2.61013   3
 -16  -1  -1 4.50800 3.36482   3
 -16  -1  -1 6.48389 3.37740   5
 -16   1  -1 6.54236 4.03838   5
 -16   1  -1 13.9987  4.3737   3
  17   2  -1 -2.5249  3.7775   4
 -16  -2   1 7.12137 3.67166   5
 -16  -2   1 7.61928 4.33018   3
  16  -2  -1 10.9161  4.3788   4
 -16   2   1 2.93387 3.02553   5
 -16   2   1 4.43418 3.67488   3
  16   2  -1 14.4572  4.7395   4
 -15  -2   1 -0.2301  2.5207   3
  15  -2  -1 2.11639 3.28652   4
 -15  -2   1 -0.8820  2.9851   5
 -15   2   1 0.54784 2.19649   3
 -15   2   1 0.75738 2.61153   5
  15   2  -1 2.20154 2.75967   4
 -14  -2   1 7.20144 3.53011   5
 -14  -2   1 13.0149  3.9655   3
 -14   2   1 12.8574  3.4754   3
 -14   2   1 9.14379 3.50340   5
  14   2  -1 14.5143  3.8943   4
  13  -2  -1 -0.4801  2.7045   2
 -13  -2   1 2.36210 2.92707   3
 -13  -2   1 1.22988 2.32729   5
  13  -2  -1 3.84257 2.94934   4
 -13   2   1 2.16802 2.20964   3
  13   2  -1 1.03965 2.18271   4
 -13   2   1 1.17738 2.31270   5
  12  -2  -1 7.79116 3.44121   2
 -12  -2   1 11.1982  3.1477   3
  12  -2  -1 20.1616  3.9332   4
 -12  -2   1 6.61417 2.97931   5
 -12   2   1 9.84011 2.92007   3
 -12   2   1 14.1518  3.6999   5
  12   2  -1 16.5571  3.6197   4
  12   2  -1 9.85493 3.41651   2
  11  -2  -1 4.72801 4.91425   6
 -11  -2   1 18.6600  3.9761   5
 -11  -2   1 17.0188  3.6617   3
  11  -2  -1 23.6981  4.2184   4
  11  -2  -1 10.3169  3.1667   2
 -11   2   1 20.3466  3.9200   5
 -11   2   1 12.3936  3.2570   3
  11   2  -1 24.8647  4.3032   4
  11   2  -1 14.4389  3.4643   2
 -10  -2   1 58.9000  6.2906   3
  10  -2  -1 33.4547  7.5614   6
 -10  -2   1 65.5138  6.6604   5
  10  -2  -1 58.8462  6.4484   2
  10  -2  -1 75.7735  6.9590   4
  10   2  -1 43.8642  5.8541   2
 -10   2   1 54.0748  6.0593   3
  10   2  -1 59.5576  6.4777   4
 -10   2   1 45.9750  5.8097   5
  10   2  -1 45.0583  7.6234   6
   9  -2  -1 17.7412  3.3393   2
   9  -2  -1 24.8688  3.8952   4
  -9  -2   1 24.0402  3.8721   5
  -9  -2   1 22.3776  3.4887   3
   9  -2  -1 14.8797  3.9795   6
   9   2  -1 13.0004  4.1960   6
  -9   2   1 22.0355  3.5419   5
   9   2  -1 20.2498  3.6125   2
  -9   2   1 18.2508  3.2324   3
   9   2  -1 25.6741  3.7745   4
  -8  -2   1 55.4505  5.7305   5
   8  -2  -1 51.4137  5.5052   2
  -8  -2   1 50.0501  4.2830   1
   8  -2  -1 40.0016  6.7236   6
  -8  -2   1 50.7107  5.5323   3
   8  -2  -1 61.8453  5.9546   4
  -8   2   1 55.6663  5.6904   3
   8   2  -1 60.6536  5.9570   4
   8   2  -1 56.9432  7.4408   6
  -8   2   1 53.6263  5.5806   5
   8   2  -1 52.4021  5.5449   2
   7  -2  -1 5.86897 2.07806   6
  -7  -2   1 5.54915 1.28628   1
  -7  -2   1 10.5471  2.0914   3
   7  -2  -1 5.84504 1.75038   4
  -7  -2   1 4.57152 1.71137   5
   7  -2  -1 7.89335 2.06765   2
   7   2  -1 6.65148 1.89606   4
   7   2  -1 5.87634 1.77076   2
   7   2  -1 9.11446 2.97446   6
  -7   2   1 8.84299 1.97881   1
  -7   2   1 8.81196 2.01382   5
  -7   2   1 6.95116 1.80657   3
  -6  -2   1 113.458   8.556   3
   6  -2  -1 99.7720  8.8272   2
   6  -2  -1 120.289   8.740   4
  -6  -2   1 121.043   8.278   1
   6  -2  -1 126.865  12.684   6
  -6  -2   1 122.222   8.746   5
  -6   2   1 134.386   8.680   3
   6   2  -1 122.357   8.830   4
  -6   2   1 121.348   8.692   5
   6   2  -1 113.537   8.848   2
  -6   2   1 115.330   8.676   1
   6   2  -1 123.844  12.808   6
  -5  -2   1 4.80808 0.98703   1
   5  -2  -1 5.56676 1.48852   2
  -5  -2   1 4.30409 1.30416   5
  -5  -2   1 5.34118 1.49450   3
   5  -2  -1 3.69997 1.24570   4
   5  -2  -1 7.98154 1.95497   6
  -5   2   1 4.79732 3.17110   6
  -5   2   1 5.89566 1.47181   5
   5   2  -1 5.80585 2.45877   6
  -5   2   1 4.79906 1.23212   3
   5   2  -1 6.47061 1.40693   2
   5   2  -1 5.35450 1.43386   4
  -5   2   1 6.72688 1.50941   1
  -4  -2   1 127.495   8.328   1
  -4  -2   1 117.824   8.469   3
   4  -2  -1 132.570  12.681   6
  -4  -2   1 120.000   8.630   5
   4  -2  -1 124.217   8.741   4
   4  -2  -1 126.468   9.013   2
   4   2  -1 105.408   8.627   4
  -4   2   1 140.086  13.642   6
  -4   2   1 125.817   8.462   3
   4   2  -1 122.367  12.792   6
  -4   2   1 127.527   8.741   1
   4   2  -1 126.924   8.865   2
  -4   2   1 122.606   8.557   5
  -3  -2   1 49.3904  3.9857   5
   3  -2  -1 61.0540  4.1643   4
   3  -2  -1 54.9209  4.1791   2
  -3  -2   1 48.3930  3.6785   1
  -3  -2   1 52.2562  3.9627   3
   3  -2  -1 59.6461  5.9506   6
  -3   2   1 54.4058  3.9511   5
   3   2  -1 51.0480  3.9871   2
  -3   2   1 48.7237  3.9827   1
  -3   2   1 51.7293  3.8546   3
   3   2  -1 74.4849  6.5971   6
   3   2  -1 49.9804  4.0144   4
  -3   2   1 46.4769  4.0958   2
  -2  -2   1 1171.56   75.69   5
   2  -2  -1 1132.67  112.60   6
   2  -2  -1 1152.80   80.07   2
  -2  -2   1 1212.38   74.66   3
   2  -2  -1 1293.92   76.84   4
  -2   2   1 1271.46   75.62   5
   2   2  -1 1257.74   76.86   4
   2   2  -1 1213.68   79.91   2
  -2   2   1 1193.85   80.08   2
  -2   2   1 1149.81   77.17   1
  -2   2   1 1224.13   74.56   3
   2  -2   1 1023.66   65.94   2
   2  -2   1 1073.71   92.79   6
  -2  -2  -1 957.540  61.281   3
   2  -2   1 952.805  63.028   4
  -2  -2  -1 952.578  62.149   5
  -2   2  -1 878.253  65.909   2
  -2   2  -1 1000.03   61.43   3
   2   2   1 1109.24   92.70   6
   2   2   1 937.129  63.208   4
   2   2   1 916.198  65.873   2
  -2   2  -1 1136.38   92.86   6
  -2   2  -1 974.196  62.283   5
  -3  -2  -1 0.66820 0.54508   3
   3  -2   1 1.48188 0.73152   4
   3  -2   1 -0.2273  0.6945   6
  -3  -2  -1 0.77814 0.62469   5
   3  -2   1 0.77786 0.79707   2
   3   2   1 -0.3805  0.7524   2
  -3   2  -1 0.75495 0.60836   3
  -3   2  -1 0.34808 0.51203   5
   3   2   1 0.57495 0.56644   4
  -4  -2  -1 90.6022  6.3797   3
   4  -2   1 94.8675  6.9553   2
  -4  -2  -1 97.8348  6.5150   5
   4  -2   1 87.1818  6.4365   4
   4  -2   1 90.1273  9.7132   6
   4   2   1 89.0416  6.8333   2
   4   2   1 104.916  10.544   6
  -4   2  -1 88.3755  6.4807   5
   4   2   1 86.6418  6.5712   4
  -4   2  -1 89.3729  6.4252   3
   5  -2   1 5.18667 1.44508   2
  -5  -2  -1 6.82830 1.51884   5
  -5  -2  -1 4.94702 1.27134   3
   5  -2   1 4.22520 1.65596   6
   5  -2   1 6.85249 1.39741   4
  -5   2  -1 7.48124 1.49114   3
   5   2   1 7.60107 1.51773   4
   5   2   1 5.13573 2.88230   6
  -5   2  -1 7.63709 1.55383   5
   5   2   1 5.33689 1.49847   2
   6  -2   1 285.707  18.040   4
   6  -2   1 237.373  18.761   2
  -6  -2  -1 255.053  17.837   5
  -6  -2  -1 284.952  17.714   3
   6  -2   1 240.508  26.333   6
  -6   2  -1 294.037  18.029   5
   6   2   1 254.117  18.053   4
   6   2   1 282.103  18.926   2
  -6   2  -1 272.184  17.695   3
   6   2   1 279.308  26.702   6
   7  -2   1 6.85556 2.33134   6
  -7  -2  -1 8.22198 1.90584   3
  -7  -2  -1 5.51930 1.69641   5
   7  -2   1 8.41757 1.91028   4
   7  -2   1 5.43971 1.80304   2
  -7   2  -1 7.33453 1.83043   5
   7   2   1 6.64477 2.12296   2
   7   2   1 8.51585 3.47312   6
  -7   2  -1 4.58645 1.62177   3
   7   2   1 5.90576 1.78264   4
   8  -2   1 44.8236  5.0748   2
  -8  -2  -1 39.7602  4.5812   3
   8  -2   1 53.9482  5.1309   4
   8  -2   1 24.4514  5.6214   6
  -8  -2  -1 43.1924  4.8046   5
   8   2   1 40.9206  4.9614   2
   8   2   1 38.0489  6.4154   6
  -8   2  -1 51.7088  5.0611   3
  -8   2  -1 44.2829  4.9700   5
   8   2   1 43.2303  4.8725   4
  -9  -2  -1 0.54074 1.38550   3
   9  -2   1 2.54397 3.60585   6
  -9  -2  -1 -0.6375  1.3941   5
   9  -2   1 -0.4350  1.1271   4
   9  -2   1 -0.4384  1.9334   2
   9   2   1 -2.3246  1.8261   2
  -9   2  -1 -0.4063  1.2071   5
   9   2   1 2.85586 3.27273   6
  -9   2  -1 2.96154 1.71755   3
   9   2   1 1.48475 1.52516   4
 -10  -2  -1 8.12851 2.43558   3
 -10  -2  -1 9.23765 2.60075   5
  10  -2   1 3.37399 4.38889   6
  10  -2   1 7.17179 2.50208   4
  10  -2   1 7.28891 3.03351   2
  10   2   1 1.67031 3.44859   6
  10   2   1 9.61897 2.49412   4
  10   2   1 4.88457 2.70222   2
 -10   2  -1 7.59696 2.45327   5
 -10   2  -1 8.54023 2.53417   3
  11  -2   1 -2.5111  4.0496   6
  11  -2   1 7.22250 2.47578   4
 -11  -2  -1 3.30059 2.52851   3
 -11  -2  -1 2.72992 2.24583   5
  11  -2   1 0.33640 2.29615   2
 -11   2  -1 3.70281 2.09713   5
 -11   2  -1 5.37521 2.42728   3
  11   2   1 3.46196 2.58708   2
  11   2   1 3.39341 1.99184   4
  11   2   1 -2.6406  3.2093   6
  12  -2   1 -6.7007  4.1323   6
  12  -2   1 -1.7831  2.0659   2
 -12  -2  -1 1.62318 2.02829   5
 -12  -2  -1 0.96910 2.35513   3
  12  -2   1 1.96057 1.95300   4
  12   2   1 -0.3459  2.0213   4
  12   2   1 -0.6877  2.5105   2
  12   2   1 -1.4427  3.5354   6
 -12   2  -1 5.07395 2.55374   5
 -12   2  -1 -0.0743  1.7183   3
  13  -2   1 2.72707 2.88134   2
  13  -2   1 3.12083 2.15641   4
 -13  -2  -1 3.79005 2.47111   5
 -13  -2  -1 -0.6437  2.1087   3
  13  -2   1 -10.661   3.557   6
 -13   2  -1 -2.8125  1.8098   3
  13   2   1 2.51588 2.44472   4
 -13   2  -1 1.92608 2.14352   5
  13   2   1 1.06991 2.67782   2
  14  -2   1 -0.2052  3.0651   2
 -14  -2  -1 3.07727 2.94047   3
  14  -2   1 6.87950 3.15390   4
 -14  -2  -1 7.98930 3.46866   5
 -14   2  -1 -0.2497  2.1730   3
 -14   2  -1 2.73735 2.89185   5
  14   2   1 7.86281 3.35000   4
  14   2   1 7.37567 3.44554   2
 -15  -2  -1 -1.5058  2.6637   5
  15  -2   1 -0.2446  3.4387   2
 -15  -2  -1 -0.4926  2.3781   3
 -15   2  -1 -3.0472  2.5643   5
  15   2   1 -1.6532  2.7146   4
 -15   2  -1 3.01113 2.76769   3
 -16  -2  -1 7.55052 4.23058   3
 -16  -2  -1 7.44671 4.12603   5
 -16   2  -1 7.39933 3.55911   5
 -16   2  -1 3.86300 3.21522   3
  17   3  -1 13.5067  5.5251   4
 -16  -3   1 -0.4677  3.6092   3
 -16  -3   1 -2.9386  3.1376   5
 -16   3   1 0.93357 3.11712   3
  16   3  -1 1.18001 3.67872   4
 -16   3   1 1.15566 2.69021   5
  15  -3  -1 10.2285  4.1759   4
 -15  -3   1 4.25644 3.16334   5
 -15  -3   1 5.41280 3.62982   3
 -15   3   1 7.96253 3.22817   5
  15   3  -1 3.57773 3.47653   4
 -15   3   1 -1.6435  2.8445   3
 -14  -3   1 -0.5569  2.4110   3
  14  -3  -1 3.50934 2.61041   4
 -14  -3   1 5.58109 2.89850   5
  14  -3  -1 -3.4353  2.5760   2
 -14   3   1 3.97935 2.60522   5
 -14   3   1 4.67917 3.09786   3
  14   3  -1 4.30719 3.15165   4
 -13  -3   1 4.51229 2.74379   3
  13  -3  -1 -1.1643  2.9518   2
  13  -3  -1 4.87927 3.11147   4
 -13  -3   1 4.51699 3.25423   5
  13   3  -1 4.35752 2.49284   4
 -13   3   1 4.44156 2.76015   3
 -13   3   1 5.86959 2.67987   5
  12  -3  -1 9.40486 3.10116   4
  12  -3  -1 13.9916  3.9403   2
  12  -3  -1 -5.9410  5.0939   6
 -12  -3   1 13.0702  3.4084   3
 -12  -3   1 16.1595  3.9234   5
 -12   3   1 9.00137 2.91562   3
  12   3  -1 15.0697  3.5745   2
  12   3  -1 13.1057  3.6625   4
 -12   3   1 9.17477 3.04189   5
  11  -3  -1 -0.9039  4.2998   6
 -11  -3   1 11.3905  3.0667   3
  11  -3  -1 21.9161  3.9929   4
 -11  -3   1 11.2540  3.3459   5
  11  -3  -1 7.89603 3.08075   2
 -11   3   1 15.9330  3.3936   3
 -11   3   1 14.1334  3.5196   5
  11   3  -1 13.4001  3.2287   2
  11   3  -1 14.3484  3.3279   4
 -10  -3   1 -0.1268  1.4837   3
  10  -3  -1 2.29312 1.99920   6
  10  -3  -1 -0.0527  2.0087   4
 -10  -3   1 2.61631 2.25868   5
  10  -3  -1 3.09040 2.43226   2
  10   3  -1 0.64339 1.82760   4
 -10   3   1 -0.0948  1.7243   3
 -10   3   1 0.68813 1.56257   5
  10   3  -1 -1.0002  1.8850   2
  -9  -3   1 11.5321  2.6380   5
   9  -3  -1 15.7869  3.1162   4
   9  -3  -1 7.28983 2.98395   6
  -9  -3   1 10.6429  2.8628   3
   9  -3  -1 5.89804 2.59746   2
   9   3  -1 12.1026  3.7618   6
  -9   3   1 12.6657  2.7692   3
   9   3  -1 12.1336  2.7566   4
   9   3  -1 9.42748 2.51617   2
  -9   3   1 10.2881  2.6632   5
   8  -3  -1 4.63744 2.08481   2
  -8  -3   1 1.37537 1.39507   3
   8  -3  -1 3.97560 1.98368   4
  -8  -3   1 -0.1988  1.2195   5
   8  -3  -1 3.11954 1.98405   6
  -8  -3   1 4.47823 1.21299   1
   8   3  -1 0.42200 2.79839   6
  -8   3   1 8.89945 2.31262   3
   8   3  -1 10.0425  2.3289   2
   8   3  -1 3.90194 1.88537   4
  -8   3   1 1.33392 1.33536   5
   7  -3  -1 50.1422  7.2357   6
  -7  -3   1 59.4554  5.1458   5
   7  -3  -1 51.2971  5.1123   2
  -7  -3   1 61.5533  5.1794   3
   7  -3  -1 59.3150  5.1390   4
  -7  -3   1 66.2211  4.5473   1
  -7   3   1 59.1129  5.7924   3
   7   3  -1 60.9349  5.1691   2
   7   3  -1 50.4149  7.3704   6
   7   3  -1 65.0297  5.3869   4
  -7   3   1 57.5331  5.0439   5
   6  -3  -1 -0.9643  0.7958   2
  -6  -3   1 -0.7368  0.8505   3
  -6  -3   1 -0.5509  1.0979   5
   6  -3  -1 0.81390 1.30499   6
  -6  -3   1 0.52168 0.60406   1
   6  -3  -1 0.33127 1.13709   4
  -6   3   1 0.50035 0.95658   5
   6   3  -1 -0.7794  0.7347   4
  -6   3   1 0.25502 0.84188   1
   6   3  -1 0.03160 0.97450   2
  -6   3   1 0.75736 1.03297   3
  -6   3   1 2.89192 3.03619   6
   6   3  -1 1.50316 2.29396   6
  -5  -3   1 481.762  30.730   3
  -5  -3   1 476.687  31.101   1
   5  -3  -1 477.198  32.891   2
   5  -3  -1 520.390  46.319   6
  -5  -3   1 478.804  31.184   5
   5  -3  -1 439.088  31.516   4
  -5   3   1 469.289  30.649   3
   5   3  -1 479.631  45.806   6
  -5   3   1 514.184  31.824   1
   5   3  -1 491.154  31.692   4
  -5   3   1 512.824  33.055   2
  -5   3   1 464.742  46.349   6
  -5   3   1 470.795  31.063   5
   5   3  -1 482.778  32.677   2
   4  -3  -1 101.176  11.205   6
  -4  -3   1 104.812   7.174   1
  -4  -3   1 106.242   7.503   3
  -4  -3   1 112.651   7.673   5
   4  -3  -1 105.224   7.987   2
   4  -3  -1 95.5681  7.6143   4
  -4   3   1 106.844   7.501   5
   4   3  -1 105.000   7.735   4
   4   3  -1 115.181   7.875   2
   4   3  -1 105.267  11.390   6
  -4   3   1 107.265  12.514   6
  -4   3   1 117.210   7.846   1
  -4   3   1 116.007   8.151   2
  -4   3   1 107.481   7.438   3
   3  -3  -1 76.3653  5.6676   4
   3  -3  -1 92.7925  6.0735   2
  -3  -3   1 76.2397  5.5013   3
  -3  -3   1 73.8092  5.5559   5
   3  -3  -1 89.0841  8.5289   6
  -3   3   1 81.6713  5.7620   1
   3   3  -1 73.9194  8.8612   6
  -3   3   1 69.0464  5.4015   5
   3   3  -1 76.6906  5.7062   2
  -3   3   1 79.2124  9.7956   6
  -3   3   1 77.5297  5.9337   2
  -3   3   1 73.3007  5.3865   3
   3   3  -1 76.3285  5.7044   4
   2  -3  -1 71.7042  5.8888   2
   2  -3  -1 84.2169  5.7351   4
  -2  -3   1 74.3369  5.4627   3
  -2  -3   1 75.8277  5.5343   5
  -2   3   1 79.4143  5.3315   3
   2   3  -1 76.7380  5.7155   2
  -2   3   1 78.7562  5.6851   1
  -2   3   1 79.7873  5.3872   5
   2   3  -1 86.9092  5.5175   5
   2   3  -1 84.4175  5.4308   3
  -2   3   1 75.1962  5.9019   2
   2   3  -1 83.0755  5.7376   4
  -2  -3  -1 34.6964  2.6740   3
   2  -3   1 42.0261  4.5623   6
   2  -3   1 43.4778  3.2708   2
  -2  -3  -1 34.1723  2.7107   5
   2  -3   1 36.6882  2.8523   4
  -2   3  -1 36.5325  2.8321   3
   2   3   1 40.6489  3.0864   4
   2   3   1 35.1977  3.1046   2
  -2   3  -1 40.7644  2.9417   5
  -2   3  -1 31.9856  3.0605   2
   3  -3   1 455.276  28.640   4
  -3  -3  -1 454.676  28.240   5
   3  -3   1 469.234  42.333   6
   3  -3   1 403.033  29.975   2
  -3  -3  -1 440.441  27.813   3
   3   3   1 425.966  28.828   4
  -3   3  -1 451.915  27.965   3
  -3   3  -1 448.737  28.349   5
  -3   3  -1 403.379  30.042   2
   3   3   1 456.476  42.370   6
   3   3   1 429.941  29.965   2
  -3   3  -1 489.003  42.943   6
  -4  -3  -1 197.627  12.831   3
  -4  -3  -1 202.164  13.051   5
   4  -3   1 177.945  13.823   2
   4  -3   1 209.325  13.180   4
   4  -3   1 176.638  19.407   6
  -4   3  -1 206.065  20.244   6
   4   3   1 207.682  13.424   4
   4   3   1 199.292  19.641   6
  -4   3  -1 188.364  13.057   5
  -4   3  -1 192.410  12.893   3
   4   3   1 201.614  13.857   2
   5  -3   1 900.214  76.983   6
  -5  -3  -1 846.759  50.884   3
   5  -3   1 859.711  52.240   4
  -5  -3  -1 814.065  51.553   5
   5  -3   1 729.897  54.539   2
  -5   3  -1 836.253  50.940   3
  -5   3  -1 787.844  77.033   6
  -5   3  -1 801.281  51.582   5
   5   3   1 809.884  76.613   6
   5   3   1 811.287  54.556   2
   5   3   1 731.002  52.312   4
   6  -3   1 189.485  20.781   6
  -6  -3  -1 215.503  13.887   3
  -6  -3  -1 218.356  14.086   5
   6  -3   1 210.699  14.946   2
   6  -3   1 215.156  14.135   4
   6   3   1 207.306  20.939   6
  -6   3  -1 210.222  14.094   5
   6   3   1 190.985  14.737   2
   6   3   1 204.150  14.296   4
  -6   3  -1 198.871  13.858   3
   7  -3   1 62.1667  5.1390   4
   7  -3   1 53.3944  7.4242   6
   7  -3   1 59.0707  5.5426   2
  -7  -3  -1 67.5106  5.2214   3
  -7  -3  -1 59.5617  5.1031   5
   7   3   1 62.9124  5.5054   2
   7   3   1 62.6728  5.3113   4
  -7   3  -1 54.2514  5.5893   3
   7   3   1 54.6598  8.0963   6
  -7   3  -1 61.4466  5.2425   5
  -8  -3  -1 0.59874 1.59169   5
  -8  -3  -1 0.88457 1.23844   3
   8  -3   1 -0.1893  1.3036   4
   8  -3   1 5.30918 2.12462   2
   8  -3   1 3.24231 2.29449   6
   8   3   1 3.71159 1.69876   4
   8   3   1 3.77802 3.19330   6
  -8   3  -1 0.19487 1.14758   3
   8   3   1 4.05967 2.12435   2
  -8   3  -1 2.41618 1.39849   5
   9  -3   1 86.6487 10.6002   6
  -9  -3  -1 95.5298  7.4192   5
   9  -3   1 90.7283  7.9148   2
  -9  -3  -1 84.7619  7.1816   3
   9  -3   1 85.4848  7.1265   4
   9   3   1 79.7352 11.1002   6
   9   3   1 81.8915  7.6900   2
  -9   3  -1 78.6858  7.0526   3
  -9   3  -1 88.7209  7.3733   5
   9   3   1 96.6914  7.5257   4
  10  -3   1 5.07415 2.23597   4
  10  -3   1 -0.9538  3.2945   6
  10  -3   1 -0.6666  2.2783   2
 -10  -3  -1 5.60052 2.40238   5
 -10  -3  -1 1.38791 1.68487   3
 -10   3  -1 1.42176 1.62433   5
  10   3   1 -0.7194  3.3035   6
 -10   3  -1 3.01004 2.08429   3
  10   3   1 3.78661 2.24362   2
  10   3   1 1.83821 1.77274   4
 -11  -3  -1 46.0118  5.7167   3
  11  -3   1 49.6260  5.7080   4
  11  -3   1 41.3265  5.7158   2
 -11  -3  -1 43.8527  5.6378   5
  11  -3   1 38.8544  8.1230   6
 -11   3  -1 32.9525  5.0511   3
 -11   3  -1 43.5255  5.5699   5
  11   3   1 43.1929  5.5701   4
  11   3   1 24.2352  6.6051   6
  11   3   1 48.3642  6.1122   2
 -12  -3  -1 13.2135  3.2651   3
 -12  -3  -1 4.76608 2.65733   5
  12  -3   1 13.1756  3.4072   4
  12  -3   1 3.79927 5.41865   6
  12  -3   1 8.20543 3.58153   2
  12   3   1 17.2381  4.0297   2
  12   3   1 6.08266 2.82385   4
 -12   3  -1 4.37937 2.43493   5
 -12   3  -1 8.12027 2.75088   3
 -13  -3  -1 19.1262  4.4382   5
  13  -3   1 3.70966 6.09652   6
  13  -3   1 21.6811  4.7289   2
  13  -3   1 14.5749  3.8664   4
 -13  -3  -1 17.7315  4.0496   3
 -13   3  -1 25.8024  4.7034   5
  13   3   1 15.7678  4.2420   2
 -13   3  -1 13.7153  3.4386   3
  13   3   1 18.3717  4.1535   4
 -14  -3  -1 11.7933  4.0805   3
  14  -3   1 15.0144  4.7935   2
 -14  -3  -1 5.50418 3.34534   5
  14   3   1 18.8428  4.5573   2
 -14   3  -1 10.3895  3.4530   3
  14   3   1 16.2900  4.3295   4
 -14   3  -1 3.15436 2.65568   5
 -15  -3  -1 15.8869  4.0691   5
 -15  -3  -1 14.0248  3.9928   3
  15  -3   1 5.15386 4.34010   2
 -15   3  -1 11.9127  3.6871   3
  15   3   1 5.95678 3.27680   4
 -15   3  -1 7.58368 3.52349   5
 -16  -3  -1 1.67591 3.62251   5
 -16  -3  -1 1.94430 3.46604   3
 -16   3  -1 2.35009 3.52332   3
 -16   3  -1 -1.4666  2.4890   5
 -16  -4   1 -2.8679  3.1637   5
 -16  -4   1 0.03031 3.06818   3
  16   4  -1 -0.3660  3.4953   4
 -16   4   1 2.43452 3.14866   3
 -16   4   1 -0.3551  2.8006   5
  15  -4  -1 25.8550  5.5375   4
 -15  -4   1 28.9758  5.8289   3
 -15  -4   1 21.5960  5.1031   5
 -15   4   1 18.0564  4.6482   3
  15   4  -1 14.2845  4.4125   4
 -15   4   1 14.3223  4.0568   5
  14  -4  -1 2.27785 3.52672   2
 -14  -4   1 3.41026 2.59610   5
  14  -4  -1 8.52340 3.68922   4
 -14  -4   1 9.34647 3.72554   3
 -14   4   1 1.56784 2.52529   5
 -14   4   1 -0.8954  2.1583   3
  14   4  -1 2.86864 3.30951   4
  13  -4  -1 23.6583  4.6654   4
  13  -4  -1 20.8199  4.6837   2
 -13  -4   1 15.9983  4.0280   5
 -13  -4   1 16.9583  4.2653   3
 -13   4   1 13.6994  3.7142   3
 -13   4   1 19.3941  4.3122   5
  13   4  -1 13.1377  3.7313   4
  12  -4  -1 -1.3981  2.3701   2
  12  -4  -1 3.83900 2.52120   4
 -12  -4   1 -0.1570  2.1306   5
 -12  -4   1 -1.6646  2.2741   3
  12   4  -1 5.32931 2.82434   4
 -12   4   1 0.13654 1.74077   5
 -12   4   1 -2.1685  1.9259   3
  12   4  -1 3.95664 2.59747   2
  11  -4  -1 13.0019  3.2952   2
  11  -4  -1 19.1979  4.4093   6
 -11  -4   1 25.1998  4.1765   3
  11  -4  -1 15.2879  3.6123   4
 -11  -4   1 13.6595  3.6622   5
 -11   4   1 15.8698  3.5172   5
 -11   4   1 13.2125  3.0810   3
  11   4  -1 9.69368 3.02673   2
  11   4  -1 13.6146  3.4290   4
 -10  -4   1 7.85387 2.43197   3
  10  -4  -1 7.98066 3.27233   6
  10  -4  -1 13.4591  3.4511   4
  10  -4  -1 11.0949  3.1506   2
 -10  -4   1 14.5817  3.2181   5
  10   4  -1 11.4567  2.8829   4
  10   4  -1 11.3472  2.9602   2
 -10   4   1 16.3545  3.3386   5
 -10   4   1 13.4764  3.0534   3
   9  -4  -1 -0.4280  1.8161   6
   9  -4  -1 -0.2640  1.5192   4
  -9  -4   1 -0.7117  1.2560   3
   9  -4  -1 1.10277 1.73362   2
  -9  -4   1 1.73083 1.89655   5
   9   4  -1 0.00829 1.51904   2
   9   4  -1 -1.6590  2.4053   6
  -9   4   1 2.01218 1.55662   5
  -9   4   1 0.32522 1.76914   3
   9   4  -1 1.97104 1.75643   4
   8  -4  -1 9.16556 2.52119   4
   8  -4  -1 9.80570 2.54688   2
  -8  -4   1 10.0218  2.5139   5
   8  -4  -1 9.70653 2.92850   6
  -8  -4   1 8.60255 2.22364   3
  -8   4   1 15.2046  2.8733   5
   8   4  -1 13.1885  2.7951   4
   8   4  -1 7.01774 3.09010   6
   8   4  -1 9.80655 2.35214   2
  -8   4   1 13.3649  2.5823   3
  -7  -4   1 95.4501  6.8280   1
   7  -4  -1 96.6263  8.0363   2
  -7  -4   1 94.9250  7.5483   3
  -7  -4   1 95.8569  7.6166   5
   7  -4  -1 109.864   7.930   4
   7  -4  -1 111.565  11.474   6
  -7   4   1 89.5550  7.4422   5
   7   4  -1 101.454  10.970   6
  -7   4   1 84.0730 11.5033   6
  -7   4   1 95.2731  7.4352   3
   7   4  -1 97.5736  7.7584   4
   7   4  -1 103.137   7.829   2
   6  -4  -1 100.279  12.165   6
  -6  -4   1 125.115   8.514   5
   6  -4  -1 97.4149  8.6590   2
  -6  -4   1 117.791   8.323   3
   6  -4  -1 117.430   8.562   4
  -6  -4   1 119.205   7.707   1
   6   4  -1 108.572   8.521   4
   6   4  -1 108.350  12.185   6
  -6   4   1 109.327   8.152   3
   6   4  -1 108.707   8.553   2
  -6   4   1 113.884  12.881   6
  -6   4   1 131.181   8.488   5
   5  -4  -1 868.943  60.883   4
  -5  -4   1 976.696  60.148   5
   5  -4  -1 874.083  89.316   6
  -5  -4   1 974.667  60.499   1
  -5  -4   1 941.187  59.258   3
   5  -4  -1 967.790  63.611   2
  -5   4   1 964.600  60.021   5
   5   4  -1 857.901  60.987   4
  -5   4   1 935.418  89.535   6
  -5   4   1 899.808  61.291   1
   5   4  -1 983.209  63.356   2
   5   4  -1 976.114  88.930   6
  -5   4   1 982.164  59.232   3
  -5   4   1 1041.03   63.85   2
   4  -4  -1 0.41397 1.00568   6
  -4  -4   1 3.37250 1.16214   5
   4  -4  -1 5.52711 1.35754   2
  -4  -4   1 3.21269 0.67638   1
   4  -4  -1 2.15408 1.01988   4
  -4  -4   1 1.69689 1.04929   3
  -4   4   1 4.61875 1.38541   2
   4   4  -1 2.09290 0.88415   2
  -4   4   1 1.47599 0.84985   1
  -4   4   1 4.10642 1.10896   3
   4   4  -1 2.71072 2.32750   6
  -4   4   1 3.01261 3.07958   6
   4   4  -1 3.93450 1.24635   4
  -4   4   1 2.60514 0.95883   5
  -3  -4   1 86.3327  5.9046   1
   3  -4  -1 89.4762  6.3695   4
  -3  -4   1 85.7144  6.2031   5
   3  -4  -1 81.8574  9.3978   6
  -3  -4   1 86.0072  6.1282   3
   3  -4  -1 80.2920  6.6323   2
  -3   4   1 87.4178  6.0096   3
   3   4  -1 97.2734  6.5375   4
   3   4  -1 93.7716  9.8374   6
  -3   4   1 83.5882 10.6448   6
  -3   4   1 90.0110  6.7194   2
  -3   4   1 86.3833  6.0639   5
   3   4  -1 83.2163  6.4145   2
  -2  -4   1 29.0072  2.6912   5
   2  -4  -1 28.2930  2.7474   4
  -2  -4   1 35.1886  2.5396   1
   2  -4  -1 31.4615  3.3609   2
  -2  -4   1 32.8837  2.7134   3
   2   4  -1 32.9525  2.5990   3
   2   4  -1 38.1966  5.5769   6
  -2   4   1 31.6765  2.7931   1
  -2   4   1 41.7236  6.9516   6
  -2   4   1 33.3855  2.5571   5
  -2   4   1 33.6063  2.5245   3
   2   4  -1 33.2397  2.8766   4
   2   4  -1 34.1878  2.6520   5
   2   4  -1 32.6598  2.7986   2
  -2   4   1 33.1520  2.9831   2
  -1  -4   1 92.2496  5.9435   3
  -1  -4   1 86.4768  5.9845   5
   1  -4  -1 85.9404  6.1361   4
   1   4  -1 87.7181  6.2868   2
   1   4  -1 84.0313  5.7781   3
  -1   4   1 86.2250  5.6187   3
  -1   4   1 82.6669  6.0467   1
  -1   4   1 81.4130  5.6581   5
   1   4  -1 91.4488  6.1730   4
   1   4  -1 83.8474  5.8548   5
  -1   4   1 84.1622  6.4082   2
   0  -4  -1 119.301   8.352   4
   0   4  -1 114.086   7.930   5
   0   4   1 115.926   8.089   1
   0   4   1 127.400   8.663   2
   0   4  -1 120.152   7.843   3
   0   4  -1 124.501   8.593   2
   1  -4   1 110.259   8.294   2
   1  -4   1 118.403   7.874   4
   1  -4   1 125.996  11.892   6
  -1   4  -1 109.729   7.552   3
  -1   4  -1 111.861   7.647   5
  -1   4  -1 116.852   8.300   2
   1   4   1 110.949   8.245   2
   2  -4   1 123.122   9.807   2
   2  -4   1 142.404   9.296   4
  -2  -4  -1 138.277   8.993   5
  -2  -4  -1 139.165   8.850   3
   2  -4   1 140.865  13.970   6
  -2   4  -1 136.096   9.178   5
  -2   4  -1 135.292   9.877   2
  -2   4  -1 137.530   9.078   3
   2   4   1 137.150  14.697   6
  -2   4  -1 147.282  15.240   6
   2   4   1 133.567   9.488   4
   2   4   1 135.992   9.819   2
  -3  -4  -1 467.340  27.867   3
   3  -4   1 395.384  42.361   6
  -3  -4  -1 457.582  28.272   5
   3  -4   1 457.100  28.756   4
   3  -4   1 416.619  30.160   2
  -3   4  -1 414.084  30.186   2
   3   4   1 431.294  28.966   4
  -3   4  -1 464.922  28.445   5
  -3   4  -1 428.432  42.789   6
   3   4   1 461.310  30.133   2
   3   4   1 463.093  42.487   6
  -3   4  -1 455.792  28.050   3
   4  -4   1 33.4707  2.7802   4
  -4  -4  -1 34.0046  3.0667   3
  -4  -4  -1 29.7017  3.0050   5
   4  -4   1 34.2576  3.5990   2
   4  -4   1 22.0103  4.0722   6
  -4   4  -1 23.0286  5.0802   6
   4   4   1 27.5864  3.2567   2
  -4   4  -1 30.8844  3.0975   3
   4   4   1 25.8117  4.5982   6
   4   4   1 27.7051  3.3154   4
  -4   4  -1 29.4160  3.1161   5
  -4   4  -1 28.3708  3.4540   2
  -5  -4  -1 389.925  25.014   3
   5  -4   1 411.672  25.723   4
   5  -4   1 440.028  38.209   6
   5  -4   1 365.877  26.954   2
  -5  -4  -1 386.310  25.361   5
  -5   4  -1 390.098  25.096   3
  -5   4  -1 354.000  38.100   6
   5   4   1 407.381  26.060   4
  -5   4  -1 388.628  25.448   5
   5   4   1 382.540  26.884   2
   5   4   1 382.612  37.737   6
  -6  -4  -1 6.64301 1.65205   3
   6  -4   1 4.54438 1.56834   2
  -6  -4  -1 3.99418 1.48375   5
   6  -4   1 3.68117 1.50823   4
   6  -4   1 3.75481 2.01653   6
  -6   4  -1 5.42526 1.52322   5
  -6   4  -1 6.11577 3.36101   6
   6   4   1 6.34714 3.08280   6
   6   4   1 4.69967 1.64694   4
  -6   4  -1 6.97528 1.71004   3
   6   4   1 3.87072 1.52761   2
   7  -4   1 30.6761  5.5216   6
  -7  -4  -1 40.5019  4.2286   3
   7  -4   1 32.9196  4.0066   4
  -7  -4  -1 34.0902  4.0228   5
   7  -4   1 43.4537  4.7829   2
   7   4   1 29.0169  5.6080   6
  -7   4  -1 36.7633  4.2218   5
   7   4   1 35.1298  4.2991   4
  -7   4  -1 43.6634  4.3926   3
   7   4   1 33.8295  4.3037   2
  -8  -4  -1 9.72203 2.27392   5
   8  -4   1 8.70288 2.44339   2
   8  -4   1 11.2504  2.3756   4
  -8  -4  -1 14.0834  2.6353   3
   8  -4   1 6.29849 2.59927   6
  -8   4  -1 9.29040 2.28160   5
   8   4   1 2.94746 1.88704   2
  -8   4  -1 10.9653  2.4096   3
   8   4   1 7.66733 3.50413   6
   8   4   1 10.0702  2.4595   4
  -9  -4  -1 12.2558  2.7042   3
  -9  -4  -1 8.99070 2.49274   5
   9  -4   1 11.4021  2.9725   2
   9  -4   1 8.06402 2.38090   4
   9  -4   1 6.29602 2.99875   6
  -9   4  -1 5.63873 1.96174   5
   9   4   1 2.56186 3.24228   6
  -9   4  -1 8.84716 2.49472   3
   9   4   1 5.73832 2.22019   4
   9   4   1 9.79508 2.84023   2
 -10  -4  -1 6.37306 2.47045   5
  10  -4   1 3.29710 2.23437   6
 -10  -4  -1 2.85305 1.77600   3
  10  -4   1 2.72359 2.12973   2
  10  -4   1 1.21523 1.69124   4
  10   4   1 1.64846 3.18132   6
 -10   4  -1 2.64627 2.07223   5
 -10   4  -1 2.56271 1.84459   3
  10   4   1 2.36734 1.76045   4
  10   4   1 3.37541 2.32246   2
 -11  -4  -1 37.3394  5.1407   3
  11  -4   1 33.0761  5.3090   2
  11  -4   1 36.0176  4.8742   4
 -11  -4  -1 37.2111  5.2104   5
  11  -4   1 11.7373  5.5960   6
 -11   4  -1 32.8789  4.8048   5
 -11   4  -1 32.5729  4.8248   3
  11   4   1 33.2957  6.5850   6
  11   4   1 40.7232  5.3963   4
  11   4   1 42.4804  5.6201   2
  12  -4   1 4.25668 3.29345   2
 -12  -4  -1 16.3817  3.5760   3
 -12  -4  -1 5.69694 2.84463   5
  12  -4   1 -4.0615  3.9364   6
  12  -4   1 7.09980 3.08956   4
  12   4   1 -0.2296  2.3602   2
 -12   4  -1 6.94344 2.91201   3
 -12   4  -1 4.03894 2.38531   5
  12   4   1 5.21128 2.67582   4
  13  -4   1 3.49113 3.10455   2
  13  -4   1 -7.3258  5.1953   6
  13  -4   1 10.6929  3.5883   4
 -13  -4  -1 8.19813 3.09142   5
 -13  -4  -1 8.37846 3.27935   3
  13   4   1 10.1596  3.4809   2
 -13   4  -1 13.7565  3.7241   3
  13   4   1 4.83560 2.74877   4
 -13   4  -1 6.38752 2.71468   5
 -14  -4  -1 -5.3843  1.8447   3
  14  -4   1 1.08034 3.57081   2
 -14  -4  -1 3.76931 3.37020   5
  14   4   1 -1.1575  2.2789   4
 -14   4  -1 -1.5021  1.9911   5
 -14   4  -1 2.94668 2.45588   3
  14   4   1 -0.2210  2.5285   2
 -15  -4  -1 -1.4041  2.4884   5
 -15  -4  -1 0.29320 3.06896   3
  15  -4   1 0.77065 3.18792   2
 -15   4  -1 3.48904 2.84533   3
 -15   4  -1 0.74333 2.98219   5
  15   4   1 4.41156 3.52498   4
 -16  -4  -1 -1.9755  3.3573   5
  16  -4   1 -6.0994  3.5288   2
 -16  -4  -1 1.08047 2.93521   3
  16   4   1 4.62966 3.56434   4
 -16   4  -1 3.94595 2.88417   5
 -16   4  -1 5.34944 3.63735   3
 -16  -5   1 1.03962 3.78606   5
 -16  -5   1 -1.3104  2.7731   3
 -16   5   1 3.18746 3.57528   3
  16   5  -1 -2.2864  2.6742   4
 -16   5   1 4.40712 3.79473   5
 -15  -5   1 -0.0954  3.2284   3
 -15  -5   1 -1.9108  3.0457   5
 -15   5   1 -2.8310  2.5570   5
  15   5  -1 0.70671 3.28213   4
 -15   5   1 1.32746 2.59352   3
  14  -5  -1 0.84876 3.14446   2
 -14  -5   1 9.14000 3.74854   5
  14  -5  -1 3.87002 3.53163   4
 -14  -5   1 8.72497 3.68418   3
  14   5  -1 2.29635 2.66992   4
 -14   5   1 2.70426 2.71002   5
 -14   5   1 6.03069 3.21641   3
  13  -5  -1 -0.6707  2.5987   4
 -13  -5   1 -0.6763  2.2127   3
  13  -5  -1 -3.1455  2.7062   2
 -13  -5   1 6.13085 3.43881   5
 -13   5   1 -1.7814  2.1866   5
  13   5  -1 1.07128 2.36848   4
 -13   5   1 0.07191 2.09504   3
  12  -5  -1 16.9308  4.2353   4
 -12  -5   1 14.3393  3.5820   3
 -12  -5   1 15.8664  4.1398   5
  12  -5  -1 4.15854 3.08919   2
  12  -5  -1 14.7460  4.0053   6
 -12   5   1 13.2119  3.3043   5
 -12   5   1 15.4841  3.8532   3
  12   5  -1 9.59162 3.18131   4
  11  -5  -1 -0.5990  2.3603   4
 -11  -5   1 1.85580 2.15418   5
  11  -5  -1 -1.0123  2.2601   2
 -11  -5   1 -0.3349  2.1679   3
  11  -5  -1 -1.1869  1.9238   6
  11   5  -1 -1.6292  1.6767   2
 -11   5   1 1.77097 1.65162   3
 -11   5   1 1.87539 1.84480   5
  11   5  -1 0.69185 1.78034   4
  10  -5  -1 16.2226  4.3184   6
 -10  -5   1 17.4454  3.5098   3
 -10  -5   1 19.6940  3.9520   5
  10  -5  -1 23.0599  3.9895   2
  10  -5  -1 16.5728  3.5771   4
  10   5  -1 17.4160  3.5577   2
  10   5  -1 10.3160  3.0083   4
 -10   5   1 19.9636  3.5638   5
 -10   5   1 20.8675  3.5557   3
  -9  -5   1 3.71820 2.14945   5
   9  -5  -1 11.7481  2.7413   4
   9  -5  -1 3.99336 2.67896   6
  -9  -5   1 4.62609 1.98642   3
   9  -5  -1 2.91062 1.99947   2
   9   5  -1 3.37001 2.00480   2
  -9   5   1 9.42386 2.55862   3
   9   5  -1 4.82528 2.15168   4
  -9   5   1 8.48881 2.20567   5
   9   5  -1 4.08002 2.76471   6
  -8  -5   1 5.41514 2.10300   5
  -8  -5   1 9.08438 2.21648   3
   8  -5  -1 5.75219 2.55370   6
   8  -5  -1 6.49501 2.42779   2
   8  -5  -1 6.24104 2.16885   4
   8   5  -1 5.45681 1.98613   4
  -8   5   1 3.23087 1.60229   3
   8   5  -1 4.53204 2.71125   6
  -8   5   1 6.94494 3.44226   6
   8   5  -1 8.50008 2.17202   2
  -8   5   1 7.05523 2.06787   5
  -7  -5   1 -0.0824  1.2265   3
   7  -5  -1 2.19727 1.74640   2
  -7  -5   1 3.61263 1.77320   5
   7  -5  -1 3.36763 2.10793   6
   7  -5  -1 -0.1643  1.6055   4
   7   5  -1 0.60760 2.04778   6
  -7   5   1 2.15475 1.40922   5
   7   5  -1 -1.6799  0.9845   2
  -7   5   1 5.96262 1.74693   3
   7   5  -1 -0.7252  0.9768   4
  -7   5   1 0.59063 2.57539   6
   6  -5  -1 123.032   8.581   4
  -6  -5   1 103.743   8.110   3
  -6  -5   1 108.478   7.426   1
   6  -5  -1 119.811   8.916   2
  -6  -5   1 116.484   8.380   5
   6  -5  -1 122.747  12.612   6
   6   5  -1 104.118  12.083   6
   6   5  -1 108.305   8.505   4
  -6   5   1 105.427   8.825   2
   6   5  -1 109.378   8.461   2
  -6   5   1 107.498  12.822   6
  -6   5   1 103.708   8.115   5
  -6   5   1 109.791   8.087   3
   5  -5  -1 1.50195 1.15054   4
   5  -5  -1 0.00418 0.96649   2
  -5  -5   1 4.51146 1.51160   5
  -5  -5   1 0.54757 1.07563   3
  -5  -5   1 2.21639 0.61646   1
   5  -5  -1 0.93690 1.24782   6
  -5   5   1 0.93163 0.95188   5
  -5   5   1 0.98488 2.70812   6
  -5   5   1 1.42363 0.90867   3
   5   5  -1 5.14371 2.66117   6
  -5   5   1 1.62348 1.08805   2
   5   5  -1 1.34146 1.09744   4
   5   5  -1 1.92572 1.12910   2
   4  -5  -1 439.626  43.430   6
  -4  -5   1 452.768  28.617   3
  -4  -5   1 446.140  29.028   5
   4  -5  -1 387.754  30.698   2
   4  -5  -1 416.085  29.403   4
  -4  -5   1 456.948  28.899   1
  -4   5   1 432.395  30.858   2
   4   5  -1 460.711  29.689   4
  -4   5   1 456.134  28.510   3
   4   5  -1 480.792  43.009   6
  -4   5   1 438.019  28.853   5
  -4   5   1 502.638  43.952   6
   4   5  -1 473.458  30.604   2
   3  -5  -1 14.4520  2.0422   4
  -3  -5   1 12.6093  1.3984   1
  -3  -5   1 11.9744  1.8214   3
  -3  -5   1 10.9640  1.7634   5
   3  -5  -1 9.69058 2.50576   6
   3  -5  -1 11.0789  2.0254   2
  -3   5   1 10.4508  1.5542   3
  -3   5   1 12.1680  1.6438   5
  -3   5   1 11.0585  2.0186   2
  -3   5   1 9.35829 4.47896   6
   3   5  -1 12.7727  1.8643   2
   3   5  -1 12.0794  1.9908   4
   3   5  -1 13.1996  3.4914   6
   2  -5  -1 45.5934  3.4167   4
  -2  -5   1 35.1609  3.1047   5
   2  -5  -1 35.7753  3.4918   2
  -2  -5   1 34.3027  3.0557   3
   2   5  -1 39.7683  3.3177   2
  -2   5   1 39.5027  2.9513   5
   2   5  -1 32.4832  3.2124   4
   2   5  -1 36.3880  2.9506   3
   2   5  -1 38.2567  3.0298   5
   2   5  -1 51.2714  6.2325   6
  -2   5   1 36.5187  2.8955   3
  -2   5   1 38.3592  3.5110   2
  -2   5   1 48.7415  7.3234   6
   1  -5  -1 8.66885 1.52565   4
  -1  -5   1 10.9559  1.5732   3
  -1  -5   1 11.8830  1.5629   5
   1   5  -1 10.0928  3.9621   6
  -1   5   1 11.0777  1.7445   2
  -1   5   1 10.8239  1.1987   3
   1   5  -1 10.1234  1.6174   2
   1   5  -1 7.68329 1.23055   3
  -1   5   1 9.80097 1.15900   5
  -1   5   1 12.3760  4.5267   6
   1   5  -1 8.55611 1.27697   5
   1   5  -1 10.0237  1.6115   4
   0  -5  -1 52.8322  4.4888   4
   0   5  -1 69.8420  8.0556   6
   0   5  -1 57.6337  4.0729   3
   0   5   1 68.0638  8.6307   6
   0   5  -1 51.7476  4.0865   5
   0   5   1 57.2264  3.9593   5
   0   5   1 54.4194  3.8781   3
   0   5   1 53.9881  4.6097   2
   0   5  -1 65.1062  4.7019   2
  -1  -5  -1 25.9529  1.9528   5
   1  -5   1 27.9856  2.7341   4
   1  -5   1 26.3636  2.9412   2
  -1  -5  -1 21.5061  1.8891   3
  -1   5  -1 25.0369  2.0980   3
  -1   5  -1 21.3652  2.0625   5
   1   5   1 26.9921  2.9004   2
   1   5   1 24.2342  1.8539   5
   1   5   1 23.1610  6.0463   6
   1   5   1 24.7739  1.8286   3
  -1   5  -1 28.6029  2.9370   2
  -1   5  -1 24.8969  5.4446   6
   2  -5   1 114.113   7.938   4
  -2  -5  -1 109.992   7.419   3
   2  -5   1 127.714   8.582   2
   2  -5   1 110.117  11.955   6
  -2  -5  -1 106.867   7.533   5
  -2   5  -1 104.879   8.417   2
   2   5   1 110.266  12.779   6
   2   5   1 112.297   8.169   4
  -2   5  -1 113.164  13.473   6
  -2   5  -1 116.227   7.694   3
  -2   5  -1 116.214   7.787   5
   2   5   1 119.854   8.447   2
  -3  -5  -1 58.1597  4.0351   3
   3  -5   1 57.1169  4.3049   4
   3  -5   1 60.6642  6.7964   6
   3  -5   1 55.5646  4.6663   2
  -3  -5  -1 53.0454  4.0601   5
   3   5   1 53.4522  7.2924   6
   3   5   1 46.7296  4.3988   4
  -3   5  -1 50.3561  7.6079   6
  -3   5  -1 49.0255  4.5925   2
  -3   5  -1 55.0904  4.2344   5
   3   5   1 54.8749  4.5704   2
  -3   5  -1 51.9938  4.1374   3
   4  -5   1 937.791  60.222   4
  -4  -5  -1 935.018  59.296   5
   4  -5   1 1006.19   63.19   2
   4  -5   1 983.239  88.848   6
  -4  -5  -1 935.523  58.448   3
  -4   5  -1 888.238  59.404   5
  -4   5  -1 856.045  63.079   2
   4   5   1 933.843  88.457   6
  -4   5  -1 918.253  58.627   3
  -4   5  -1 1032.01   89.14   6
   4   5   1 943.044  60.565   4
   4   5   1 902.606  62.919   2
  -5  -5  -1 0.71178 0.97630   3
  -5  -5  -1 2.49576 1.14046   5
   5  -5   1 2.32257 1.23579   2
   5  -5   1 3.00599 1.63276   6
   5  -5   1 3.03963 1.29663   4
   5   5   1 0.37699 2.24354   6
   5   5   1 0.87432 1.02798   2
  -5   5  -1 0.61464 0.96198   3
  -5   5  -1 2.61491 1.25694   5
   5   5   1 2.39450 1.22804   4
  -5   5  -1 2.08623 1.41625   2
  -5   5  -1 1.49006 3.29621   6
   6  -5   1 201.343  13.873   4
  -6  -5  -1 195.441  13.467   3
  -6  -5  -1 204.229  13.720   5
   6  -5   1 217.917  14.874   2
   6  -5   1 204.239  20.727   6
  -6   5  -1 189.573  13.545   3
   6   5   1 198.713  20.569   6
  -6   5  -1 220.388  21.458   6
   6   5   1 193.968  14.507   2
  -6   5  -1 188.424  13.682   5
   6   5   1 185.291  14.062   4
  -7  -5  -1 28.4367  3.5468   5
   7  -5   1 24.7863  3.3342   4
   7  -5   1 23.3911  3.6898   2
   7  -5   1 16.5448  4.0111   6
  -7  -5  -1 17.7381  2.8001   3
  -7   5  -1 28.1884  3.5479   3
  -7   5  -1 11.8091  4.4436   6
  -7   5  -1 29.8561  3.5440   5
   7   5   1 23.6705  3.5581   4
   7   5   1 17.3714  4.5091   6
   7   5   1 26.1913  3.7452   2
   8  -5   1 0.26648 1.46472   4
   8  -5   1 3.91234 2.11412   2
  -8  -5  -1 0.93541 1.50384   3
   8  -5   1 3.64626 2.33915   6
  -8  -5  -1 4.50824 1.85459   5
   8   5   1 4.23704 2.95950   6
   8   5   1 2.73759 1.60786   4
  -8   5  -1 3.90196 1.76153   5
  -8   5  -1 3.85754 1.87319   3
   8   5   1 8.00657 2.34156   2
  -9  -5  -1 68.8341  5.8048   3
   9  -5   1 71.9130  6.8003   4
   9  -5   1 62.0557  6.9274   2
  -9  -5  -1 60.6794  6.4477   5
   9  -5   1 57.1762  8.9110   6
   9   5   1 72.4576  7.2324   2
   9   5   1 61.1263  6.7769   4
  -9   5  -1 69.2604  6.8715   5
   9   5   1 49.6374  8.4650   6
  -9   5  -1 52.8696  6.0609   3
 -10  -5  -1 8.42967 2.73878   3
  10  -5   1 12.3053  4.1234   6
 -10  -5  -1 7.42780 2.77023   5
  10  -5   1 12.1856  3.4510   2
  10  -5   1 12.7096  3.0751   4
  10   5   1 12.8816  3.2488   2
  10   5   1 10.3863  4.1224   6
 -10   5  -1 8.98738 2.63372   5
  10   5   1 12.5042  3.1696   4
 -10   5  -1 12.2652  2.7877   3
 -11  -5  -1 5.38769 2.85015   5
  11  -5   1 18.4587  4.4839   6
  11  -5   1 9.90246 3.43193   2
  11  -5   1 13.5976  3.3938   4
 -11  -5  -1 14.4092  3.2484   3
  11   5   1 19.0116  3.8142   2
 -11   5  -1 12.1182  3.0272   5
 -11   5  -1 9.87306 3.03156   3
  11   5   1 20.1252  4.0597   4
  11   5   1 13.4062  4.7492   6
  12  -5   1 25.3342  8.1000   6
 -12  -5  -1 59.7786  6.8200   3
  12  -5   1 74.4265  7.4592   4
 -12  -5  -1 71.2133  7.2988   5
  12  -5   1 56.3074  7.2292   2
 -12   5  -1 47.8002  6.5352   5
  12   5   1 48.4662  6.5912   4
  12   5   1 62.7131  7.5148   2
 -12   5  -1 42.8941  6.0663   3
  13  -5   1 -1.1252  3.0461   2
 -13  -5  -1 -0.6426  2.5911   3
 -13  -5  -1 -0.0602  2.4747   5
 -13   5  -1 -0.5844  2.3303   5
  13   5   1 -1.9617  2.4068   4
 -13   5  -1 0.73935 2.22018   3
  13   5   1 5.27077 2.82587   2
 -14  -5  -1 26.6252  5.2519   5
  14  -5   1 14.5435  4.7183   2
 -14  -5  -1 21.8008  4.5453   3
  14  -5   1 -3.4646  6.7631   6
 -14   5  -1 25.4597  4.7602   3
  14   5   1 23.9359  5.0204   4
 -14   5  -1 16.4918  4.2024   5
  15  -5   1 0.98698 4.02362   2
 -15  -5  -1 -0.2824  2.9030   3
 -15  -5  -1 -1.7804  2.3934   5
 -15   5  -1 4.99224 3.19437   3
 -15   5  -1 3.21738 2.76874   5
  15   5   1 2.90578 3.41085   4
  16  -5   1 -0.1694  3.9618   2
 -16  -5  -1 8.61556 4.26887   5
 -16  -5  -1 3.32963 3.80448   3
  16   5   1 5.09789 3.92150   4
 -16   5  -1 5.66447 3.94330   5
 -16   5  -1 2.42941 2.76958   3
 -16  -6   1 5.85779 4.24925   5
 -16  -6   1 6.04455 4.10033   3
 -16   6   1 7.98693 3.87468   5
  16   6  -1 5.63326 3.97921   4
 -15  -6   1 -0.3805  3.2443   3
 -15  -6   1 -0.0705  3.0728   5
  15  -6  -1 -1.0473  3.9000   2
 -15   6   1 2.12430 3.07735   3
 -15   6   1 -0.1696  2.4610   5
  15   6  -1 -1.9184  3.0737   4
  14  -6  -1 20.9707  4.8349   4
 -14  -6   1 14.6338  4.1907   3
 -14  -6   1 7.95651 4.02545   5
  14  -6  -1 6.96285 3.62252   2
 -14   6   1 7.63151 3.59541   5
 -14   6   1 5.16729 2.89683   3
  14   6  -1 7.89963 3.81192   4
 -13  -6   1 9.84770 3.82019   5
 -13  -6   1 4.78216 2.89761   3
  13  -6  -1 -1.9878  2.6821   2
  13  -6  -1 7.26319 3.32964   4
 -13   6   1 3.87093 2.77745   3
 -13   6   1 1.01973 2.67083   5
  13   6  -1 10.6341  3.7423   4
 -12  -6   1 19.1991  4.2041   3
  12  -6  -1 19.1701  4.4716   2
  12  -6  -1 20.5437  4.5223   4
 -12  -6   1 17.2503  3.9894   5
  12  -6  -1 12.7273  4.3939   6
 -12   6   1 26.3299  4.7565   5
  12   6  -1 16.0595  4.0058   4
 -12   6   1 11.6590  3.6189   3
  11  -6  -1 22.3543  5.5167   6
 -11  -6   1 27.0868  4.6314   5
  11  -6  -1 27.1808  4.7363   2
 -11  -6   1 29.0310  4.7131   3
  11  -6  -1 33.1081  5.1679   4
 -11   6   1 18.0250  4.0054   5
  11   6  -1 37.5808  5.5488   4
  11   6  -1 33.8832  4.7992   2
 -11   6   1 26.2861  4.5621   3
  10  -6  -1 103.172   8.512   4
  10  -6  -1 91.2122  8.5162   2
 -10  -6   1 90.8618  8.1475   3
  10  -6  -1 100.871  12.352   6
 -10   6   1 85.7368  8.9270   5
  10   6  -1 93.6131  9.5654   4
 -10   6   1 86.1333  7.8185   3
  10   6  -1 98.3390  8.2980   2
   9  -6  -1 -0.7330  1.7260   2
   9  -6  -1 4.23819 2.73718   6
  -9  -6   1 0.35599 1.74715   3
   9  -6  -1 0.71969 2.06245   4
  -9  -6   1 0.49693 1.57093   5
  -9   6   1 1.23859 1.76373   3
   9   6  -1 2.25776 1.67679   2
  -9   6   1 2.49183 3.60314   6
  -9   6   1 -2.2931  1.4628   5
   9   6  -1 -0.1295  1.5652   4
   8  -6  -1 33.5387  4.6302   4
   8  -6  -1 27.8197  4.3286   2
   8  -6  -1 21.7554  5.2273   6
  -8  -6   1 31.9295  4.3608   5
  -8  -6   1 31.3607  4.0946   3
  -8   6   1 23.5968  5.8430   6
  -8   6   1 36.6621  4.3896   3
   8   6  -1 38.3118  4.8785   4
  -8   6   1 38.8789  4.5395   5
   8   6  -1 31.3243  5.4261   6
   8   6  -1 34.6779  4.2793   2
  -7  -6   1 35.3111  4.5431   3
   7  -6  -1 42.1603  7.0310   6
   7  -6  -1 42.8733  5.2256   2
   7  -6  -1 53.9636  5.5677   4
  -7  -6   1 44.5829  5.0253   5
   7   6  -1 43.9583  5.2841   4
  -7   6   1 50.1338  5.0025   3
   7   6  -1 49.6348  5.1281   2
  -7   6   1 47.6122  7.6569   6
  -7   6   1 56.4338  6.0093   2
   7   6  -1 38.8444  6.3325   6
  -7   6   1 48.2391  4.9759   5
   6  -6  -1 65.9005  5.7628   4
  -6  -6   1 65.5882  5.5590   3
  -6  -6   1 67.2901  5.7383   5
   6  -6  -1 74.0443  6.2944   2
   6  -6  -1 69.7357  8.8067   6
  -6   6   1 69.7254  5.6577   5
   6   6  -1 69.3223  6.0042   4
  -6   6   1 65.5329  5.5116   3
   6   6  -1 70.5625  5.8559   2
   6   6  -1 67.5139  8.6548   6
  -6   6   1 78.8011  6.5145   2
  -6   6   1 60.6528  9.2569   6
   5  -6  -1 0.40966 1.27061   2
   5  -6  -1 -0.3638  1.1553   6
   5  -6  -1 -0.3835  0.9607   4
  -5  -6   1 -0.0925  0.9419   5
  -5  -6   1 1.48086 0.57970   1
  -5  -6   1 -0.4016  0.9591   3
   5   6  -1 -0.8036  2.0544   6
   5   6  -1 0.44699 0.93010   4
  -5   6   1 -0.0922  0.7375   3
  -5   6   1 0.32461 0.97581   2
   5   6  -1 0.38118 0.93224   2
  -5   6   1 -0.7328  0.7633   5
  -5   6   1 -4.0292  2.6579   6
   4  -6  -1 77.8273  6.3352   4
  -4  -6   1 83.5358  6.1558   3
  -4  -6   1 82.5857  6.2412   5
   4  -6  -1 71.2769  9.4265   6
   4  -6  -1 77.6919  6.7377   2
  -4  -6   1 86.3855  5.6896   1
   4   6  -1 80.3055  6.4637   2
   4   6  -1 84.9352  9.7053   6
  -4   6   1 86.4614  6.1294   5
  -4   6   1 81.2630  6.0049   3
  -4   6   1 87.4297  6.9168   2
   4   6  -1 83.2235  6.5695   4
  -4   6   1 76.9916 10.3664   6
  -3  -6   1 209.857  14.187   3
   3  -6  -1 233.204  15.664   2
   3  -6  -1 209.952  14.709   4
  -3  -6   1 212.326  14.197   1
  -3  -6   1 211.685  14.376   5
   3  -6  -1 217.642  22.015   6
  -3   6   1 213.634  14.206   5
   3   6  -1 203.594  14.799   4
  -3   6   1 230.401  15.616   2
   3   6  -1 219.399  15.219   2
  -3   6   1 206.439  14.012   3
  -3   6   1 235.852  22.416   6
   3   6  -1 212.084  21.714   6
  -2  -6   1 647.372  42.280   5
  -2  -6   1 663.292  41.710   3
   2  -6  -1 688.039  45.164   2
   2  -6  -1 687.754  43.157   4
   2   6  -1 643.084  42.148   5
   2   6  -1 684.626  44.836   2
  -2   6   1 672.034  41.496   3
   2   6  -1 689.732  43.222   4
   2   6  -1 646.653  41.560   3
  -2   6   1 598.928  44.943   2
   2   6  -1 676.543  63.137   6
  -2   6   1 709.397  63.722   6
  -2   6   1 650.463  42.030   5
   1  -6  -1 22.6436  2.8430   4
  -1  -6   1 29.4561  2.8374   3
  -1  -6   1 28.3095  2.8167   5
   1   6  -1 23.7928  2.9364   4
  -1   6   1 27.7691  3.2521   2
  -1   6   1 23.7236  2.0176   3
   1   6  -1 24.7458  2.2436   5
   1   6  -1 25.8069  5.1397   6
  -1   6   1 29.1557  5.7393   6
  -1   6   1 24.3447  2.0301   5
   1   6  -1 27.5642  2.6063   3
   1   6  -1 25.4345  2.9729   2
   0  -6   1 85.4519  6.1936   4
   0  -6  -1 75.2340  6.1426   4
   0   6  -1 82.2418  5.6876   5
   0   6  -1 74.6297  6.2184   2
   0   6   1 95.7141 10.6942   6
   0   6  -1 79.5104  5.5762   3
   0   6   1 76.9179  6.2910   2
   0   6   1 77.1980  5.3129   3
   0   6   1 80.9065  5.4025   5
   0   6  -1 87.5263 10.1487   6
  -1  -6  -1 39.1606  2.7981   3
   1  -6   1 34.2872  3.8917   2
   1  -6   1 39.6564  3.3320   4
  -1  -6  -1 32.1957  2.7666   5
  -1   6  -1 41.9855  6.5302   6
  -1   6  -1 34.1352  2.9634   5
   1   6   1 38.9153  2.7109   3
  -1   6  -1 34.0548  2.9349   3
   1   6   1 39.7980  2.7612   5
   1   6   1 50.5298  6.8617   6
  -1   6  -1 39.3973  3.5338   2
   1   6   1 36.6789  3.4565   2
   2  -6   1 138.108   9.635   4
   2  -6   1 153.789  14.706   6
   2  -6   1 149.124  10.347   2
  -2  -6  -1 129.982   8.958   3
  -2  -6  -1 133.785   9.119   5
   2   6   1 139.534  15.295   6
   2   6   1 145.913  10.198   2
  -2   6  -1 137.314   9.247   3
  -2   6  -1 134.944   9.344   5
  -2   6  -1 139.846  15.564   6
   2   6   1 127.447   9.806   4
  -2   6  -1 131.646  10.211   2
   3  -6   1 49.3080  6.0728   6
  -3  -6  -1 40.5472  3.3481   3
  -3  -6  -1 40.3410  3.4100   5
   3  -6   1 44.8026  4.1047   2
   3  -6   1 40.1803  3.6263   4
   3   6   1 41.1793  3.9832   2
   3   6   1 44.5146  4.5410   4
  -3   6  -1 51.4059  4.2368   2
  -3   6  -1 41.9106  3.5735   3
  -3   6  -1 41.8970  6.7990   6
  -3   6  -1 41.6583  3.5936   5
   3   6   1 43.5381  6.5190   6
   4  -6   1 54.2216  6.5970   6
   4  -6   1 48.7186  4.5563   2
  -4  -6  -1 46.1553  3.8246   3
   4  -6   1 51.3759  4.1497   4
  -4  -6  -1 44.5939  3.8973   5
   4   6   1 47.4441  4.3396   4
  -4   6  -1 44.9994  7.1597   6
  -4   6  -1 46.7386  4.0530   5
  -4   6  -1 42.8017  3.9401   3
   4   6   1 48.0474  4.3585   2
  -4   6  -1 53.8253  4.7207   2
   4   6   1 48.6322  7.0973   6
  -5  -6  -1 31.4395  3.3267   5
   5  -6   1 39.0637  4.2141   2
  -5  -6  -1 33.5131  3.3319   3
   5  -6   1 30.1466  3.4548   4
   5  -6   1 21.9836  4.6744   6
  -5   6  -1 26.0898  3.2442   5
   5   6   1 25.1790  5.1454   6
  -5   6  -1 29.2751  3.3863   3
  -5   6  -1 33.5768  4.1387   2
   5   6   1 27.2035  3.6446   4
  -5   6  -1 20.8871  5.1479   6
   5   6   1 35.6110  3.9423   2
  -6  -6  -1 131.053   9.631   5
   6  -6   1 144.188   9.889   4
   6  -6   1 132.106  14.723   6
  -6  -6  -1 138.182   9.517   3
   6  -6   1 123.659  10.374   2
  -6   6  -1 128.983   9.700   5
   6   6   1 117.949   9.977   4
   6   6   1 140.774  10.339   2
  -6   6  -1 131.065  10.613   2
  -6   6  -1 129.148   9.578   3
   6   6   1 142.793  14.879   6
  -6   6  -1 150.370  15.511   6
  -7  -6  -1 82.2552  6.5040   3
   7  -6   1 93.5062 10.5017   6
   7  -6   1 80.0305  6.7347   4
   7  -6   1 75.0851  7.1112   2
  -7  -6  -1 84.5453  6.6464   5
  -7   6  -1 83.9462  6.7363   5
  -7   6  -1 86.0362  6.6258   3
   7   6   1 78.4194  7.0221   2
   7   6   1 72.1142 10.1295   6
  -7   6  -1 88.8976 10.9288   6
   7   6   1 75.1312  6.8763   4
   8  -6   1 34.6954  4.7034   2
  -8  -6  -1 30.3980  3.9495   3
   8  -6   1 19.8932  5.0135   6
   8  -6   1 34.9520  4.3448   4
  -8  -6  -1 39.0789  4.4048   5
   8   6   1 34.7456  4.5919   2
  -8   6  -1 38.1338  4.4159   5
  -8   6  -1 19.6980  5.5775   6
   8   6   1 23.1902  5.2469   6
   8   6   1 32.1049  4.4566   4
  -8   6  -1 32.2416  4.1912   3
  -9  -6  -1 -0.8290  1.6071   5
   9  -6   1 0.84172 1.68894   4
   9  -6   1 -0.6426  1.5285   2
  -9  -6  -1 -1.6920  1.3657   3
   9  -6   1 0.64133 1.90821   6
   9   6   1 -1.0580  2.6700   6
  -9   6  -1 -0.7767  1.4136   5
   9   6   1 -1.1857  1.4238   4
   9   6   1 0.79592 1.87453   2
  -9   6  -1 1.74863 1.61721   3
  10  -6   1 10.5276  3.0798   4
 -10  -6  -1 6.71532 2.75985   5
  10  -6   1 14.5030  3.5610   2
 -10  -6  -1 6.64776 2.42398   3
  10  -6   1 7.41572 3.59913   6
 -10   6  -1 7.04857 2.30398   5
  10   6   1 8.04743 3.77300   6
 -10   6  -1 12.2053  3.0527   3
  10   6   1 8.03598 2.68684   4
  10   6   1 13.6069  3.2690   2
 -11  -6  -1 3.12225 2.62906   5
 -11  -6  -1 2.70547 2.12864   3
  11  -6   1 0.25910 2.20403   6
  11  -6   1 0.08143 2.35127   4
  11  -6   1 -0.5868  2.0294   2
 -11   6  -1 2.32137 2.28095   3
  11   6   1 3.13147 2.27195   4
  11   6   1 3.70030 2.32565   2
 -11   6  -1 3.38530 2.08606   5
 -12  -6  -1 5.05594 2.70709   5
  12  -6   1 4.33593 2.94153   4
  12  -6   1 0.01363 2.45893   2
 -12  -6  -1 3.75546 2.58419   3
  12  -6   1 6.61869 2.82177   6
  12   6   1 8.44395 3.01645   4
 -12   6  -1 8.13451 2.99759   5
 -12   6  -1 8.40899 2.79638   3
  12   6   1 7.39806 2.86847   2
 -13  -6  -1 5.44763 3.16850   3
 -13  -6  -1 6.76154 3.24537   5
  13  -6   1 0.23266 2.69665   2
  13   6   1 0.80028 2.84028   4
 -13   6  -1 -2.7307  1.9574   3
  13   6   1 4.00960 2.69259   2
 -13   6  -1 0.27256 2.52464   5
  14  -6   1 6.60502 4.14170   2
 -14  -6  -1 6.95161 3.63126   5
 -14  -6  -1 0.52482 2.43729   3
  14  -6   1 -17.719   5.083   6
 -14   6  -1 0.88557 2.54371   3
 -14   6  -1 5.23554 3.15798   5
  14   6   1 14.4645  3.9936   4
 -15  -6  -1 -0.1230  2.7188   5
 -15  -6  -1 5.25696 3.67518   3
  15  -6   1 -4.7690  3.7621   2
 -15   6  -1 0.09839 3.20012   5
  15   6   1 2.14098 2.90338   4
 -15   6  -1 -0.1507  2.3177   3
 -16  -6  -1 6.65198 4.38773   3
  16  -6   1 -0.5422  4.3618   2
 -16  -6  -1 3.04222 3.83503   5
  16   6   1 2.72650 3.89775   4
 -16  -7   1 2.23035 3.92665   5
 -16  -7   1 2.40188 4.04455   3
  16   7  -1 3.32965 4.35898   4
 -15  -7   1 5.41137 3.75695   5
  15  -7  -1 1.24362 3.89827   2
 -15  -7   1 4.54585 3.91134   3
  15   7  -1 1.69604 3.36041   4
 -15   7   1 -1.4460  2.4375   5
 -15   7   1 0.05686 2.56029   3
 -14  -7   1 0.78360 2.86244   3
 -14  -7   1 4.16079 3.63601   5
  14  -7  -1 -1.5385  2.9248   2
 -14   7   1 0.60014 2.24577   3
 -14   7   1 2.22668 2.83944   5
  14   7  -1 0.22032 2.66573   4
 -13  -7   1 8.20038 3.36195   3
 -13  -7   1 6.33339 3.54371   5
  13  -7  -1 5.07855 3.57407   2
  13  -7  -1 12.7246  4.1444   6
  13  -7  -1 2.78440 2.73736   4
  13   7  -1 6.76639 3.58249   4
 -13   7   1 3.95176 2.84495   5
 -13   7   1 6.91952 3.12695   3
  12  -7  -1 0.60594 3.08752   6
  12  -7  -1 1.96173 2.88583   2
 -12  -7   1 3.43403 2.51029   5
  12  -7  -1 6.83916 3.45158   4
 -12  -7   1 4.26520 2.89667   3
 -12   7   1 7.00604 3.23578   5
 -12   7   1 3.57782 2.50718   3
  12   7  -1 7.44602 3.04312   4
  11  -7  -1 23.5234  4.5871   2
 -11  -7   1 12.4508  3.2826   3
  11  -7  -1 18.8905  4.2347   4
 -11  -7   1 9.02310 3.28295   5
  11  -7  -1 16.9807  5.1385   6
 -11   7   1 8.43152 2.83086   5
 -11   7   1 18.4875  3.8046   3
  11   7  -1 21.0884  4.3180   4
  10  -7  -1 0.52593 2.14793   4
 -10  -7   1 -2.2581  1.2703   3
  10  -7  -1 -0.9340  2.4800   6
 -10  -7   1 2.97872 2.30959   5
  10  -7  -1 0.46596 2.06799   2
  10   7  -1 -1.2044  1.4086   2
 -10   7   1 1.38018 3.95582   6
 -10   7   1 -0.1654  1.7859   5
 -10   7   1 -0.9688  1.8353   3
  10   7  -1 0.02470 1.79491   4
  -9  -7   1 13.6220  3.2274   5
   9  -7  -1 12.9142  3.2208   4
  -9  -7   1 10.2500  2.6612   3
   9  -7  -1 13.7741  4.1181   6
   9  -7  -1 10.8907  3.2019   2
  -9   7   1 12.3599  2.9212   3
  -9   7   1 8.67980 4.24918   6
  -9   7   1 13.7084  2.9497   5
   9   7  -1 17.4573  3.2410   2
   9   7  -1 15.7132  3.5979   4
   8  -7  -1 0.07693 1.72928   2
  -8  -7   1 0.74475 1.66752   3
  -8  -7   1 -1.1709  1.2551   5
   8  -7  -1 -0.0687  1.5627   6
   8  -7  -1 1.10088 1.87311   4
   8   7  -1 -1.7651  2.0569   6
  -8   7   1 -0.0618  1.1783   3
  -8   7   1 1.70024 3.39839   6
  -8   7   1 3.29155 2.03998   2
  -8   7   1 0.79908 1.31056   5
   8   7  -1 1.99261 1.78251   4
   8   7  -1 0.56542 1.38751   2
   7  -7  -1 68.7713  7.1056   2
   7  -7  -1 56.3450  8.8793   6
  -7  -7   1 68.7550  5.8433   5
  -7  -7   1 56.5101  5.9893   3
   7  -7  -1 70.2636  5.9092   4
  -7   7   1 67.4735  5.6019   5
  -7   7   1 56.1703  9.2992   6
   7   7  -1 69.2578  6.9610   4
   7   7  -1 56.4167  5.6485   2
  -7   7   1 61.5655  5.4355   3
   7   7  -1 67.2734  8.4355   6
  -7   7   1 71.1537  6.3938   2
   6  -7  -1 0.85953 1.29063   4
   6  -7  -1 -1.3359  1.4576   6
   6  -7  -1 0.81979 1.27500   2
  -6  -7   1 -0.5196  1.2388   5
  -6  -7   1 1.01677 1.21041   3
   6   7  -1 -1.2364  0.9311   2
  -6   7   1 -0.5568  2.5636   6
   6   7  -1 -2.0391  2.0141   6
  -6   7   1 -0.1692  0.8398   3
  -6   7   1 1.17640 1.35599   2
  -6   7   1 0.86069 0.99039   5
   6   7  -1 0.20714 1.25361   4
   5  -7  -1 10.9709  3.2482   6
  -5  -7   1 10.1948  2.1697   3
  -5  -7   1 10.4080  2.1252   5
   5  -7  -1 9.14973 2.17221   4
   5  -7  -1 6.02473 2.04373   2
  -5   7   1 8.69538 3.63757   6
   5   7  -1 6.50211 3.06898   6
   5   7  -1 10.2987  2.2291   4
   5   7  -1 8.22611 1.97287   2
  -5   7   1 7.59389 1.85146   5
  -5   7   1 11.7219  1.9271   3
  -5   7   1 11.1929  2.3283   2
  -4  -7   1 34.2991  3.4888   3
   4  -7  -1 24.7771  3.3379   4
  -4  -7   1 28.4196  2.3435   1
  -4  -7   1 23.2809  3.0633   5
   4  -7  -1 23.8672  4.8230   6
   4  -7  -1 32.6389  4.0244   2
  -4   7   1 32.7859  3.2667   3
  -4   7   1 17.4708  4.9647   6
  -4   7   1 28.1269  3.1436   5
  -4   7   1 27.5050  3.7675   2
   4   7  -1 27.1025  3.5429   4
   4   7  -1 30.4679  5.0701   6
   4   7  -1 29.3020  3.5759   2
  -3  -7   1 206.618  13.661   3
  -3  -7   1 206.275  13.832   5
   3  -7  -1 188.579  21.152   6
   3  -7  -1 212.415  14.260   4
   3  -7  -1 231.636  15.232   2
  -3   7   1 211.616  13.644   5
   3   7  -1 213.709  21.018   6
  -3   7   1 205.645  13.471   3
  -3   7   1 197.877  21.413   6
  -3   7   1 192.259  14.911   2
   3   7  -1 205.679  13.478   3
   3   7  -1 206.345  13.699   5
   3   7  -1 185.062  14.552   2
   3   7  -1 209.488  14.379   4
   2  -7  -1 -0.8325  0.7472   2
   2  -7  -1 0.02546 0.87856   4
  -2  -7   1 1.46659 0.95091   5
  -2  -7   1 1.80554 1.09618   3
  -2   7   1 0.22949 0.91947   2
   2   7  -1 1.54978 0.87832   5
   2   7  -1 1.79810 1.04887   4
  -2   7   1 0.25330 0.60174   3
   2   7  -1 2.59810 3.11216   6
   2   7  -1 0.76741 0.73362   3
  -2   7   1 1.24165 0.80553   5
   2   7  -1 0.45322 0.90378   2
  -2   7   1 3.13942 3.27450   6
  -1  -7   1 380.295  22.859   5
  -1  -7   1 371.789  22.523   3
   1  -7  -1 329.908  23.326   4
  -1   7   1 337.031  22.352   5
   1   7  -1 354.981  22.325   3
  -1   7   1 318.279  22.030   3
   1   7  -1 345.986  24.258   2
   1   7  -1 354.605  22.620   5
  -1   7   1 378.657  34.764   6
   1   7  -1 365.953  34.454   6
  -1   7   1 335.666  24.384   2
   0  -7   1 12.4602  2.1992   4
   0  -7  -1 8.75576 1.92531   4
   0   7  -1 9.75276 1.46154   3
   0   7  -1 8.61138 1.45067   5
   0   7   1 8.09885 1.85808   2
   0   7   1 8.74241 1.19583   5
   0   7   1 8.43220 1.17201   3
   0   7   1 7.70343 3.81334   6
   0   7  -1 3.95126 3.78851   6
   0   7  -1 11.1006  2.0785   2
  -1  -7  -1 370.889  23.592   5
   1  -7   1 378.407  24.562   4
  -1  -7  -1 380.265  23.287   3
  -1  -7  -1 337.366  24.718   4
   1  -7   1 399.042  25.812   2
  -1   7  -1 389.993  36.394   6
  -1   7  -1 350.289  23.772   5
  -1   7  -1 348.160  23.446   3
   1   7   1 370.478  23.501   5
   1   7   1 380.242  23.191   3
   1   7   1 373.174  25.638   2
   1   7   1 377.482  36.301   6
  -1   7  -1 354.137  25.593   2
  -2  -7  -1 6.73202 1.26683   3
   2  -7   1 8.28596 1.72691   4
   2  -7   1 11.7695  2.8853   6
   2  -7   1 8.96821 1.95674   2
  -2  -7  -1 8.82846 1.36908   5
   2   7   1 12.4680  2.1885   2
  -2   7  -1 13.4220  1.8205   3
   2   7   1 11.7084  3.8529   6
  -2   7  -1 10.1758  1.6019   5
  -2   7  -1 9.23028 4.17217   6
  -2   7  -1 7.71203 1.76895   2
   3  -7   1 83.5816  9.0600   6
  -3  -7  -1 68.5612  5.1879   3
   3  -7   1 69.3886  5.6191   4
  -3  -7  -1 77.4799  5.3449   5
   3  -7   1 75.5918  6.2576   2
   3   7   1 82.8261  9.8914   6
  -3   7  -1 71.0457  5.4394   3
  -3   7  -1 77.4247  5.5825   5
   3   7   1 59.5695  5.8007   4
  -3   7  -1 73.0038  6.2128   2
  -3   7  -1 73.9445  9.7330   6
   3   7   1 66.2157  5.9714   2
  -4  -7  -1 8.70761 1.64531   5
  -4  -7  -1 8.08720 1.51041   3
   4  -7   1 3.26255 1.49893   2
   4  -7   1 5.35128 2.20819   6
   4  -7   1 8.54110 1.78473   4
   4   7   1 5.40169 1.70802   4
   4   7   1 5.79723 1.72618   2
  -4   7  -1 3.61699 3.20141   6
  -4   7  -1 9.39931 2.11985   2
   4   7   1 5.99361 3.41328   6
  -4   7  -1 5.82760 1.41413   3
  -4   7  -1 6.45548 1.60265   5
  -5  -7  -1 17.8348  2.4288   3
   5  -7   1 19.4003  3.1888   2
  -5  -7  -1 19.7639  2.6284   5
   5  -7   1 14.8280  3.8772   6
   5  -7   1 15.5544  2.6322   4
  -5   7  -1 15.4284  4.4486   6
   5   7   1 23.8239  3.4198   4
   5   7   1 21.1906  3.1279   2
  -5   7  -1 27.2028  3.2107   5
  -5   7  -1 18.0482  3.0914   2
   5   7   1 15.0051  4.3452   6
  -5   7  -1 19.7028  2.7118   3
   6  -7   1 47.8612  4.8415   4
  -6  -7  -1 40.7539  4.4763   5
   6  -7   1 46.1930  5.3482   2
  -6  -7  -1 42.9767  4.4230   3
   6  -7   1 47.0483  7.1584   6
   6   7   1 39.1553  6.6953   6
  -6   7  -1 38.9315  7.0739   6
  -6   7  -1 46.5833  5.5192   2
  -6   7  -1 36.8074  4.4216   3
   6   7   1 44.6926  5.1340   2
   6   7   1 40.4299  5.0093   4
  -6   7  -1 49.4688  4.9621   5
  -7  -7  -1 155.025  11.536   5
   7  -7   1 136.334  17.345   6
  -7  -7  -1 178.080  11.530   3
   7  -7   1 163.914  11.811   4
   7  -7   1 176.355  12.756   2
   7   7   1 153.417  12.048   4
   7   7   1 156.007  17.411   6
  -7   7  -1 169.339  11.637   3
  -7   7  -1 143.977  11.530   5
  -7   7  -1 173.204  12.945   2
   7   7   1 157.885  12.337   2
  -7   7  -1 173.599  18.511   6
   8  -7   1 2.48456 2.01380   4
   8  -7   1 0.37161 1.95203   2
   8  -7   1 0.30013 2.20349   6
  -8  -7  -1 0.54021 1.53960   3
  -8  -7  -1 1.62660 1.62962   5
   8   7   1 0.21537 1.52148   2
  -8   7  -1 2.26862 3.57898   6
   8   7   1 0.63089 2.65060   6
   8   7   1 2.29594 1.96092   4
  -8   7  -1 2.13449 1.67926   5
  -8   7  -1 -0.9919  1.3384   3
  -9  -7  -1 57.8366  6.6958   5
   9  -7   1 77.4350  7.4525   4
   9  -7   1 69.4224 10.3014   6
   9  -7   1 61.9881  7.5930   2
  -9  -7  -1 76.1270  6.3081   3
   9   7   1 65.4318  7.4729   2
   9   7   1 74.8212  7.8251   4
   9   7   1 67.5783  9.7823   6
  -9   7  -1 66.5390  7.1069   3
  -9   7  -1 62.3652 10.7749   6
  -9   7  -1 76.3619  7.5490   5
 -10  -7  -1 1.03402 1.82222   3
  10  -7   1 1.24090 2.42852   6
 -10  -7  -1 1.48098 1.85384   5
  10  -7   1 4.45209 2.51262   4
  10  -7   1 3.34532 2.32587   2
 -10   7  -1 4.46120 2.50030   5
  10   7   1 3.61162 3.12180   6
  10   7   1 -0.3790  1.7890   2
  10   7   1 0.19963 1.75781   4
 -10   7  -1 -0.4759  1.5861   3
 -11  -7  -1 33.9165  5.2762   3
  11  -7   1 46.6788  5.9026   4
 -11  -7  -1 32.2706  5.0126   5
  11  -7   1 30.7696  6.9201   6
  11  -7   1 32.3460  5.5849   2
 -11   7  -1 33.6491  5.4636   5
 -11   7  -1 32.7137  5.0772   3
  11   7   1 38.5066  5.7737   4
  11   7   1 40.9184  5.7572   2
  12  -7   1 0.89787 2.47315   2
 -12  -7  -1 -2.3791  2.0212   3
  12  -7   1 2.42903 2.82677   6
 -12  -7  -1 4.08066 2.51821   5
 -12   7  -1 -1.3826  1.5575   3
  12   7   1 -1.7529  1.9856   4
 -12   7  -1 12.6423  3.5887   5
  12   7   1 2.75170 2.37785   2
 -13  -7  -1 21.6540  4.7612   3
  13  -7   1 25.3290  5.4883   6
 -13  -7  -1 27.6473  5.2183   5
  13  -7   1 17.3085  4.5158   2
 -13   7  -1 23.6327  4.9194   5
  13   7   1 23.5884  4.9344   2
  13   7   1 14.2154  4.1539   4
 -13   7  -1 23.4592  4.8000   3
  14  -7   1 -2.2418  2.5102   2
 -14  -7  -1 -1.6148  2.9185   5
 -14  -7  -1 0.66315 3.08786   3
 -14   7  -1 -0.8180  2.2084   5
  14   7   1 0.43751 3.16375   4
 -14   7  -1 -0.4052  2.5946   3
 -15  -7  -1 13.1933  4.4940   5
 -15  -7  -1 2.28562 3.31380   3
  15  -7   1 7.71815 4.60272   2
 -15   7  -1 2.76238 3.14106   3
  15   7   1 5.58765 4.04235   4
 -15   7  -1 2.49841 2.50136   5
 -16  -7  -1 0.56934 3.74001   3
  16  -7   1 -2.9496  4.4189   2
 -16  -7  -1 -0.5714  2.9952   5
  16   7   1 -0.3597  3.6949   4
 -16  -8   1 -2.2775  3.5046   3
 -15  -8   1 1.27878 3.00946   3
 -15  -8   1 6.71299 4.00138   5
  15  -8  -1 5.93551 4.37800   2
 -15   8   1 9.04328 3.77981   3
  15   8  -1 -0.3873  3.8590   4
 -15   8   1 -2.0626  2.7902   5
 -14  -8   1 0.17098 2.98440   5
  14  -8  -1 3.51153 3.60796   2
 -14  -8   1 0.17965 2.94073   3
  14   8  -1 1.15434 3.27777   4
 -14   8   1 8.41913 3.70015   5
 -14   8   1 3.49165 3.02875   3
  13  -8  -1 6.93388 4.30971   6
  13  -8  -1 18.5339  4.4296   4
 -13  -8   1 8.69988 3.96716   5
  13  -8  -1 21.1297  4.8575   2
 -13  -8   1 16.8581  4.3829   3
 -13   8   1 15.2628  3.9221   3
  13   8  -1 14.0705  4.0364   4
 -13   8   1 12.0834  3.9226   5
  12  -8  -1 1.01479 3.35089   6
  12  -8  -1 0.95643 2.99027   2
 -12  -8   1 0.42499 2.33807   3
 -12  -8   1 4.07872 3.01674   5
  12  -8  -1 3.08179 2.78828   4
  12   8  -1 6.03895 2.90969   4
 -12   8   1 0.04723 2.00799   3
 -12   8   1 5.24118 2.77097   5
 -11  -8   1 47.4493  6.3858   5
  11  -8  -1 50.5467  6.8173   2
  11  -8  -1 45.8657  6.3789   4
 -11  -8   1 46.8306  6.0390   3
  11  -8  -1 35.3881  7.8204   6
 -11   8   1 43.5525  5.9832   3
  11   8  -1 42.5252  6.3472   4
 -11   8   1 42.2109  5.9562   5
 -10  -8   1 8.77607 2.51033   3
 -10  -8   1 5.05747 2.65023   5
  10  -8  -1 1.60369 2.64564   2
  10  -8  -1 3.72937 3.02744   6
  10  -8  -1 -0.3979  2.3936   4
  10   8  -1 4.85322 2.27693   2
 -10   8   1 5.75785 2.41290   5
  10   8  -1 3.50326 2.33245   4
 -10   8   1 2.94599 4.19224   6
 -10   8   1 1.64173 2.13848   3
  -9  -8   1 6.66268 2.63534   5
  -9  -8   1 8.51466 2.61093   3
   9  -8  -1 8.11246 2.99483   2
   9  -8  -1 7.41105 2.96853   4
   9  -8  -1 6.27385 3.06289   6
   9   8  -1 11.5802  2.7700   2
  -9   8   1 6.55038 4.41536   6
   9   8  -1 14.0209  3.4099   4
  -9   8   1 6.71374 2.45244   5
  -9   8   1 9.87241 2.50606   3
   8  -8  -1 3.47705 2.63939   6
  -8  -8   1 4.77907 1.89863   3
  -8  -8   1 0.10290 1.70645   5
   8  -8  -1 5.89485 2.65919   2
   8  -8  -1 4.80895 2.23496   4
  -8   8   1 4.21447 2.18259   2
   8   8  -1 2.78420 1.97670   4
   8   8  -1 2.85082 1.94190   2
   8   8  -1 0.57316 2.42783   6
  -8   8   1 1.09804 1.71257   3
  -8   8   1 1.68742 1.73205   5
  -8   8   1 2.34986 3.64232   6
  -7  -8   1 79.1041  6.8388   5
  -7  -8   1 76.9227  6.6582   3
   7  -8  -1 84.5919  7.0196   4
   7  -8  -1 93.1716  7.7071   2
   7  -8  -1 99.3537 11.1448   6
   7   8  -1 81.3726  7.0438   2
  -7   8   1 71.8168  6.4291   3
  -7   8   1 69.9992  6.5806   5
   7   8  -1 77.2272 10.1587   6
  -7   8   1 88.3384  7.7089   2
  -7   8   1 92.5762 11.7114   6
   7   8  -1 73.9067  7.0818   4
   6  -8  -1 72.5704  7.3983   2
  -6  -8   1 63.0123  5.5578   3
  -6  -8   1 63.7123  5.7038   5
   6  -8  -1 57.6556  9.2213   6
   6  -8  -1 67.9923  6.0098   4
  -6   8   1 64.9688  9.7608   6
  -6   8   1 68.6962  5.5825   3
  -6   8   1 65.8089  5.5989   5
   6   8  -1 66.0377  5.9236   2
  -6   8   1 78.6728  6.7367   2
   6   8  -1 65.4436  8.6836   6
   6   8  -1 67.6486  7.0125   4
   5  -8  -1 91.8596  8.3750   2
  -5  -8   1 89.1075  7.4779   3
   5  -8  -1 107.403  12.336   6
   5  -8  -1 104.094   7.988   4
  -5  -8   1 99.1026  7.7022   5
  -5   8   1 100.670   7.610   5
  -5   8   1 109.240   7.600   3
   5   8  -1 106.344   8.207   2
   5   8  -1 102.353   8.231   4
  -5   8   1 95.6649 12.3978   6
  -5   8   1 110.774   8.703   2
   5   8  -1 104.236  11.792   6
   4  -8  -1 21.9066  3.4326   2
  -4  -8   1 16.2226  2.5089   5
   4  -8  -1 15.2365  3.9819   6
  -4  -8   1 15.0574  2.4189   3
   4  -8  -1 19.4819  2.9544   4
  -4  -8   1 16.7152  1.9392   1
  -4   8   1 12.6406  4.1738   6
   4   8  -1 15.8253  2.6678   2
   4   8  -1 21.1444  3.1884   4
   4   8  -1 13.6789  3.9746   6
  -4   8   1 21.1717  2.6470   5
  -4   8   1 20.7415  2.5853   3
  -4   8   1 15.0436  2.9064   2
  -3  -8   1 116.319   8.776   5
   3  -8  -1 124.782   9.209   4
   3  -8  -1 120.816  13.972   6
   3  -8  -1 125.069   9.843   2
  -3  -8   1 119.351   8.683   3
   3   8  -1 118.576   8.506   3
  -3   8   1 141.262   9.986   2
   3   8  -1 124.678   8.688   5
   3   8  -1 129.491  13.679   6
   3   8  -1 118.646   9.320   4
   3   8  -1 122.086   9.444   2
  -3   8   1 133.251  14.470   6
  -3   8   1 119.526   8.601   5
  -3   8   1 127.096   8.552   3
  -2  -8   1 48.7719  4.3143   3
   2  -8  -1 67.0694  5.4675   2
  -2  -8   1 53.2629  4.4720   5
   2  -8  -1 61.4916  4.9849   4
   2   8  -1 53.5532  7.7349   6
   2   8  -1 52.8220  4.8565   2
  -2   8   1 52.7284  4.1257   5
   2   8  -1 57.7837  4.3364   5
   2   8  -1 50.1493  4.7761   4
  -2   8   1 52.3267  4.0969   3
   2   8  -1 55.9750  4.2374   3
  -2   8   1 54.7548  5.0706   2
  -2   8   1 51.2546  8.2000   6
  -1  -8   1 10.4585  1.8656   5
  -1  -8   1 9.34043 1.72084   3
   1  -8  -1 14.4617  2.3829   4
   1   8  -1 12.6025  1.7480   5
  -1   8   1 8.82535 1.36617   3
  -1   8   1 8.57961 2.07255   2
   1   8  -1 9.78942 1.62165   3
  -1   8   1 11.7378  3.9845   6
   1   8  -1 13.0329  2.3024   2
   1   8  -1 10.3299  3.9039   6
  -1   8   1 8.36368 1.35202   5
   0  -8  -1 85.4513  5.8236   5
   0  -8   1 84.7402  6.6695   4
   0  -8  -1 78.5605  6.6258   4
   0   8  -1 75.0597 10.0478   6
   0   8   1 89.2991 10.6161   6
   0   8  -1 81.6054  6.7587   2
   0   8   1 86.9129  5.6270   3
   0   8  -1 71.6815  5.7652   3
   0   8  -1 88.3085  6.0126   5
   0   8   1 72.3970  6.6700   2
   0   8   1 80.4970  5.6454   5
  -1  -8  -1 147.584  10.179   5
  -1  -8  -1 168.305  11.438   4
   1  -8   1 158.906  11.054   4
  -1  -8  -1 150.555  10.048   3
   1  -8   1 137.833  11.441   2
   1   8   1 160.602  10.104   5
   1   8   1 154.646  11.535   2
   1   8   1 156.541  17.050   6
  -1   8  -1 138.169  10.200   3
   1   8   1 150.565   9.940   3
  -1   8  -1 162.314  16.794   6
  -1   8  -1 163.916  11.631   2
  -1   8  -1 153.275  10.422   5
   2  -8   1 130.166  13.221   6
   2  -8   1 106.893   9.015   2
  -2  -8  -1 116.792   7.864   5
   2  -8   1 124.977   8.629   4
  -2  -8  -1 112.057   7.736   3
   2   8   1 117.276   9.027   2
  -2   8  -1 98.5075  8.8756   2
   2   8   1 110.804  13.201   6
  -2   8  -1 113.604   8.125   5
  -2   8  -1 123.789  13.788   6
  -2   8  -1 115.187   8.025   3
  -3  -8  -1 173.791  11.934   5
   3  -8   1 205.291  19.289   6
   3  -8   1 179.218  12.577   4
  -3  -8  -1 178.588  11.773   3
   3  -8   1 166.119  13.277   2
  -3   8  -1 165.508  12.137   5
   3   8   1 160.045  12.788   4
  -3   8  -1 187.519  12.117   3
   3   8   1 193.348  13.342   2
   3   8   1 171.004  18.874   6
  -3   8  -1 193.324  13.546   2
  -3   8  -1 180.313  19.430   6
   4  -8   1 51.2241  5.3600   2
  -4  -8  -1 42.8391  3.7546   5
   4  -8   1 47.4481  4.6896   4
  -4  -8  -1 38.4412  3.5748   3
   4  -8   1 38.0305  6.6271   6
  -4   8  -1 41.5283  7.0459   6
   4   8   1 40.8381  7.0063   6
   4   8   1 39.1528  4.8065   4
   4   8   1 46.9893  5.0989   2
  -4   8  -1 49.7991  5.4469   2
  -4   8  -1 44.5281  3.9608   5
  -4   8  -1 47.4639  4.5952   3
   5  -8   1 29.0613  5.5796   6
  -5  -8  -1 35.7577  3.6927   5
  -5  -8  -1 38.0605  3.6588   3
   5  -8   1 30.6413  3.7547   4
   5  -8   1 24.8652  3.9885   2
  -5   8  -1 23.7448  5.5556   6
  -5   8  -1 30.6502  3.7441   5
   5   8   1 22.3585  5.3720   6
  -5   8  -1 32.3979  4.3389   2
  -5   8  -1 32.7522  3.8063   3
   5   8   1 30.6357  4.1101   2
   5   8   1 35.7859  4.5218   4
   6  -8   1 6.87639 2.09970   4
  -6  -8  -1 9.33732 2.04746   5
  -6  -8  -1 9.36448 2.04822   3
   6  -8   1 9.95257 2.61926   2
   6  -8   1 8.37884 3.13876   6
  -6   8  -1 8.57001 2.05532   5
   6   8   1 6.53000 3.31920   6
  -6   8  -1 9.73155 2.11420   3
  -6   8  -1 13.0490  3.0097   2
  -6   8  -1 5.23361 3.45289   6
   6   8   1 10.2317  2.5467   4
   6   8   1 11.3628  2.6632   2
  -7  -8  -1 6.40831 2.04816   5
  -7  -8  -1 2.18837 1.53133   3
   7  -8   1 2.39254 2.27570   6
   7  -8   1 3.52396 2.04698   4
   7  -8   1 2.14079 1.85648   2
  -7   8  -1 6.72390 2.49116   2
   7   8   1 5.09702 2.11813   4
   7   8   1 2.79127 3.07628   6
  -7   8  -1 2.91246 3.67455   6
  -7   8  -1 3.70008 1.86103   3
  -7   8  -1 4.14753 1.81318   5
   7   8   1 3.91203 2.05089   2
  -8  -8  -1 4.87430 2.14710   5
   8  -8   1 7.09558 2.76326   2
   8  -8   1 5.69870 2.40590   4
  -8  -8  -1 9.39184 2.37184   3
   8  -8   1 5.52899 2.93041   6
  -8   8  -1 10.0143  2.4869   5
   8   8   1 5.16987 2.15665   4
  -8   8  -1 6.22587 3.84010   6
   8   8   1 8.64970 2.74990   2
   8   8   1 3.49478 3.12354   6
  -8   8  -1 8.74602 2.40409   3
  -9  -8  -1 2.56723 1.98377   5
   9  -8   1 -0.5441  2.4039   6
   9  -8   1 2.89383 1.99291   4
   9  -8   1 -0.6281  2.0658   2
  -9  -8  -1 1.33107 1.74476   3
   9   8   1 4.00052 2.30113   4
   9   8   1 -1.0055  2.4560   6
  -9   8  -1 0.48849 1.80476   5
  -9   8  -1 4.04098 4.24506   6
  -9   8  -1 -0.1069  1.4244   3
   9   8   1 1.55727 1.83615   2
  10  -8   1 7.56646 3.65053   6
 -10  -8  -1 13.4586  3.0606   3
 -10  -8  -1 15.2006  3.2471   5
  10  -8   1 21.8003  4.0863   4
  10  -8   1 12.3008  3.4069   2
 -10   8  -1 10.6296  3.1021   3
  10   8   1 7.96729 3.96787   6
  10   8   1 10.8216  2.8267   2
  10   8   1 12.7249  3.4952   4
 -10   8  -1 9.90759 2.95161   5
 -11  -8  -1 14.2418  3.6738   5
  11  -8   1 22.0478  4.3979   4
  11  -8   1 13.5463  5.1639   6
  11  -8   1 14.6807  4.2644   2
 -11  -8  -1 21.7857  4.1397   3
  11   8   1 12.5959  3.6934   4
  11   8   1 19.7598  3.9756   2
 -11   8  -1 16.7166  3.7014   3
 -11   8  -1 17.0157  3.7368   5
 -12  -8  -1 7.50818 2.77812   3
  12  -8   1 7.11694 3.34765   2
 -12  -8  -1 21.4697  4.2400   5
  12  -8   1 7.58976 3.98179   6
 -12   8  -1 7.30595 2.92944   3
  12   8   1 12.1722  3.9014   4
  12   8   1 17.0823  3.9894   2
 -12   8  -1 8.56905 3.08501   5
 -13  -8  -1 6.14416 3.40953   5
  13  -8   1 -3.6212  2.8012   2
  13  -8   1 4.53802 3.06613   6
 -13  -8  -1 2.44160 2.83228   3
 -13   8  -1 4.20634 2.86882   3
  13   8   1 -1.8887  2.5937   4
 -13   8  -1 -0.8465  2.2826   5
 -14  -8  -1 1.58799 2.78214   5
  14  -8   1 -3.4838  3.1334   2
 -14  -8  -1 1.94460 3.12770   3
  14  -8   1 -2.9580  3.5049   6
  14   8   1 -1.1485  2.4470   4
 -14   8  -1 -0.0583  2.8364   5
 -14   8  -1 -0.7492  2.1846   3
 -15  -8  -1 0.77692 3.57503   5
  15  -8   1 -3.9609  3.6948   2
 -15   8  -1 2.83916 2.85144   3
  15   8   1 0.47167 3.40751   4
 -15   8  -1 -4.1763  2.6196   5
 -16  -8  -1 -2.4493  3.7132   5
 -15  -9   1 -2.8916  3.5481   3
 -15  -9   1 1.55822 3.80057   5
  15  -9  -1 1.39719 4.01785   2
  15   9  -1 -2.3279  3.6975   4
 -15   9   1 4.23792 3.58780   5
 -15   9   1 1.36226 3.09004   3
 -14  -9   1 0.92553 3.45063   5
 -14  -9   1 0.61288 3.31464   3
  14  -9  -1 -3.3822  3.3770   2
 -14   9   1 0.08209 2.76018   5
  14   9  -1 -2.3863  2.7058   4
 -13  -9   1 3.91282 3.24640   3
 -13  -9   1 2.63939 3.24385   5
  13  -9  -1 0.56873 3.47925   6
  13  -9  -1 0.52481 2.97841   2
  13   9  -1 0.58999 3.26734   4
 -13   9   1 1.91634 2.45997   3
 -13   9   1 -1.2955  2.0473   5
  12  -9  -1 1.59401 3.06738   4
  12  -9  -1 7.17016 3.41224   2
  12  -9  -1 0.29054 3.20971   6
 -12  -9   1 7.14705 3.17213   3
 -12  -9   1 2.12762 2.84337   5
 -12   9   1 0.34470 2.62734   3
  12   9  -1 2.78747 3.16316   4
 -12   9   1 -1.1926  2.4381   5
 -11  -9   1 -3.2591  2.1021   3
  11  -9  -1 1.92687 2.56969   4
  11  -9  -1 -0.5867  2.4397   6
 -11  -9   1 -0.5507  2.4949   5
  11  -9  -1 0.73335 2.28846   2
  11   9  -1 0.03394 2.28178   4
 -11   9   1 -4.3023  3.5975   6
 -11   9   1 1.66176 2.30609   3
 -11   9   1 -2.6723  1.9774   5
  10  -9  -1 12.5400  3.5586   2
 -10  -9   1 18.1126  3.8567   5
 -10  -9   1 15.4058  3.5576   3
  10  -9  -1 10.9809  4.2409   6
  10  -9  -1 18.6617  4.2246   4
  10   9  -1 18.9390  3.9283   2
  10   9  -1 20.5478  4.1816   4
 -10   9   1 20.0262  3.9118   3
 -10   9   1 13.5443  3.4149   5
 -10   9   1 15.1139  5.3342   6
  -9  -9   1 1.47577 1.98691   5
   9  -9  -1 1.16323 2.67611   6
   9  -9  -1 -1.6754  1.9317   2
  -9  -9   1 0.60338 1.87875   3
   9  -9  -1 -0.9631  2.0110   4
  -9   9   1 -2.0899  1.7092   2
  -9   9   1 0.84019 1.88562   5
  -9   9   1 1.84863 1.70629   3
  -9   9   1 -0.2311  2.9655   6
   9   9  -1 2.19230 1.81487   2
   9   9  -1 -1.8562  1.4018   4
   8  -9  -1 14.4942  3.4252   4
  -8  -9   1 11.0552  2.8469   5
   8  -9  -1 7.81479 2.68133   2
   8  -9  -1 9.78775 3.75688   6
  -8  -9   1 12.1665  2.7950   3
   8   9  -1 11.7369  3.1358   4
  -8   9   1 10.7218  3.3012   2
  -8   9   1 8.25744 2.48868   3
  -8   9   1 4.94512 3.92591   6
   8   9  -1 12.5960  2.9269   2
  -8   9   1 12.9004  2.7860   5
   7  -9  -1 5.14244 2.28326   2
   7  -9  -1 1.30369 2.40556   6
  -7  -9   1 4.52359 2.10553   5
  -7  -9   1 5.73379 2.12159   3
   7  -9  -1 3.57674 2.26028   4
   7   9  -1 5.15539 2.10275   4
  -7   9   1 2.61237 3.71477   6
  -7   9   1 10.1510  2.8127   2
  -7   9   1 2.60756 1.73696   3
   7   9  -1 5.22333 2.04746   2
   7   9  -1 5.36018 2.99798   6
  -7   9   1 6.78341 2.18664   5
   6  -9  -1 29.6559  6.1498   6
  -6  -9   1 32.7727  4.1320   5
   6  -9  -1 35.1433  4.8905   2
  -6  -9   1 29.0085  3.8347   3
   6  -9  -1 33.7063  4.3464   4
   6   9  -1 33.0417  4.4345   2
  -6   9   1 34.8293  4.1613   3
  -6   9   1 37.4062  7.0086   6
   6   9  -1 29.1094  5.7126   6
  -6   9   1 34.5304  4.8524   2
  -6   9   1 35.5487  4.1469   5
   6   9  -1 30.0222  4.5495   4
  -5  -9   1 5.32103 1.63226   3
   5  -9  -1 4.64760 2.02095   2
   5  -9  -1 3.64844 2.27846   6
  -5  -9   1 -0.3683  1.3492   5
   5  -9  -1 3.50032 1.70386   4
   5   9  -1 4.06110 3.04888   6
   5   9  -1 5.35217 1.93247   4
  -5   9   1 7.35945 1.78812   3
  -5   9   1 0.76208 2.85208   6
  -5   9   1 2.28773 1.72898   2
   5   9  -1 3.68605 1.66154   2
  -5   9   1 11.5645  2.0426   5
  -4  -9   1 45.3770  4.5018   5
   4  -9  -1 40.8711  4.6008   4
   4  -9  -1 32.7675  6.4405   6
  -4  -9   1 44.9436  4.3625   3
   4  -9  -1 36.1397  4.7971   2
   4   9  -1 35.6174  6.2904   6
   4   9  -1 37.6220  4.6508   2
  -4   9   1 42.8578  4.1722   3
   4   9  -1 35.1957  4.7265   4
  -4   9   1 29.4892  6.3985   6
  -4   9   1 57.7149  5.8468   2
  -4   9   1 39.5015  4.0694   5
   3  -9  -1 0.00706 1.53684   6
  -3  -9   1 3.28466 1.26922   3
  -3  -9   1 3.14373 1.38711   5
   3  -9  -1 2.95162 1.45643   4
   3  -9  -1 6.94231 2.21444   2
   3   9  -1 2.81974 1.40326   2
   3   9  -1 1.90497 1.01924   3
  -3   9   1 2.25596 1.06183   3
  -3   9   1 2.26635 1.35221   2
   3   9  -1 1.88215 1.03850   5
  -3   9   1 1.42038 2.89441   6
   3   9  -1 3.67445 1.62112   4
   3   9  -1 2.89491 2.70523   6
  -3   9   1 0.83055 0.97172   5
   2  -9  -1 14.1243  2.7518   4
  -2  -9   1 10.1115  1.9337   3
  -2  -9   1 15.0443  2.3008   5
   2  -9  -1 12.7206  2.6724   2
  -2   9   1 17.2419  2.0432   5
   2   9  -1 16.1930  4.3216   6
   2   9  -1 16.6584  2.7791   2
   2   9  -1 12.0721  1.9873   5
  -2   9   1 11.6635  4.1650   6
  -2   9   1 17.1537  2.1064   3
  -2   9   1 14.3219  2.7329   2
   2   9  -1 11.8134  1.8967   3
  -1  -9   1 7.79259 1.70665   3
  -1  -9   1 7.71321 1.73317   5
   1  -9  -1 11.0924  2.2355   4
   1   9  -1 10.0576  1.6546   3
  -1   9   1 7.06823 1.27642   5
   1   9  -1 2.30922 3.28017   6
   1   9  -1 8.95047 1.65729   5
  -1   9   1 7.05247 3.54268   6
   1   9  -1 5.29763 1.81508   2
  -1   9   1 8.18929 2.12729   2
  -1   9   1 6.95398 1.26218   3
   0  -9  -1 90.4252  6.2325   5
   0  -9  -1 94.0205  6.2419   3
   0  -9  -1 89.6443  7.1960   4
   0  -9   1 73.7130  6.8882   4
   0   9  -1 78.3284  6.2842   5
   0   9   1 86.1556 11.2970   6
   0   9   1 86.6499  6.0559   5
   0   9  -1 100.336   7.461   2
   0   9  -1 85.7126  6.2831   3
   0   9  -1 94.9563 10.8284   6
   0   9   1 78.4110  7.1894   2
   0   9   1 84.9465  5.9921   3
  -1  -9  -1 4.15063 1.17300   3
  -1  -9  -1 7.00616 1.37015   5
   1  -9   1 6.38581 1.87003   4
   1  -9   1 4.57571 1.67083   2
  -1  -9  -1 2.55363 1.48132   4
  -1   9  -1 6.43917 1.93839   2
  -1   9  -1 2.53814 1.10216   5
  -1   9  -1 3.06230 3.11067   6
   1   9   1 4.15715 1.00228   3
   1   9   1 4.74064 1.06124   5
   1   9   1 6.19719 3.79824   6
  -1   9  -1 5.87453 1.33720   3
   1   9   1 4.28712 1.57899   2
  -2  -9  -1 30.8562  2.9829   3
   2  -9   1 32.4653  5.7547   6
   2  -9   1 32.8110  3.8306   4
  -2  -9  -1 30.7090  2.7083   5
   2  -9   1 32.2322  4.1816   2
   2   9   1 28.9087  2.5105   3
  -2   9  -1 30.7987  3.3317   3
  -2   9  -1 24.0844  5.4986   6
  -2   9  -1 31.5751  3.3568   5
   2   9   1 23.6139  5.4980   6
  -2   9  -1 32.7825  4.1439   2
   2   9   1 35.1045  4.3021   2
   3  -9   1 -0.4157  1.0444   4
  -3  -9  -1 2.93866 1.09179   5
   3  -9   1 -0.1952  1.4996   6
  -3  -9  -1 0.13718 0.94327   3
   3  -9   1 0.17210 1.25740   2
   3   9   1 -0.1997  0.8890   2
   3   9   1 0.38887 3.20220   6
  -3   9  -1 1.95136 1.04624   5
  -3   9  -1 -1.5184  2.4948   6
  -3   9  -1 0.61886 1.01716   3
  -3   9  -1 -0.8134  1.2351   2
  -4  -9  -1 103.473   7.431   3
  -4  -9  -1 97.3648  7.5372   5
   4  -9   1 117.956   8.986   2
   4  -9   1 106.274  12.499   6
   4  -9   1 99.9904  8.0606   4
  -4   9  -1 98.4705  8.7408   2
  -4   9  -1 117.302   7.923   3
   4   9   1 103.067   8.554   4
  -4   9  -1 112.709  13.313   6
   4   9   1 102.549   8.526   2
  -4   9  -1 105.562   7.865   5
   4   9   1 100.469  12.388   6
  -5  -9  -1 -1.0192  1.1454   5
   5  -9   1 -0.1974  1.5685   6
   5  -9   1 -0.8849  1.1076   2
  -5  -9  -1 0.51842 1.18486   3
   5  -9   1 1.48939 1.27192   4
  -5   9  -1 1.61743 2.74689   6
   5   9   1 -0.6664  2.4502   6
  -5   9  -1 1.19764 1.12216   5
   5   9   1 0.63979 1.29254   4
   5   9   1 1.83217 1.52763   2
  -5   9  -1 2.24445 1.35828   3
  -5   9  -1 3.23979 1.74628   2
  -6  -9  -1 61.1485  5.0836   5
   6  -9   1 69.3374  7.0538   2
   6  -9   1 59.0440  8.9807   6
   6  -9   1 55.9458  5.8986   4
  -6  -9  -1 55.0568  4.8530   3
  -6   9  -1 63.3907  6.0680   3
  -6   9  -1 41.5811  8.3757   6
   6   9   1 58.0936  6.4588   2
  -6   9  -1 57.6985  5.9348   5
  -6   9  -1 59.9412  6.7867   2
   6   9   1 49.8150  8.2867   6
   6   9   1 45.9754  6.0501   4
   7  -9   1 0.10521 1.86853   4
  -7  -9  -1 3.74389 1.73004   5
   7  -9   1 3.37867 2.21447   2
  -7  -9  -1 6.75659 1.98336   3
   7  -9   1 1.99321 2.43729   6
  -7   9  -1 1.46828 3.09841   6
  -7   9  -1 1.33281 1.66837   2
   7   9   1 1.26185 2.95380   6
  -7   9  -1 3.03208 1.74977   3
   7   9   1 2.26944 1.93793   2
  -7   9  -1 3.96310 1.86738   5
   7   9   1 5.79949 2.29489   4
   8  -9   1 36.2797  5.2518   2
  -8  -9  -1 27.9207  3.9243   3
   8  -9   1 28.8288  6.0561   6
  -8  -9  -1 32.1429  4.2548   5
   8  -9   1 27.8777  4.3144   4
  -8   9  -1 28.4772  6.3917   6
  -8   9  -1 28.1358  4.8519   2
  -8   9  -1 37.8219  4.8177   3
   8   9   1 24.1066  4.4361   4
   8   9   1 24.7343  5.8668   6
   8   9   1 31.2357  4.7882   2
  -8   9  -1 34.7149  4.5629   5
   9  -9   1 -0.1393  2.2947   4
  -9  -9  -1 -1.2158  1.6241   3
   9  -9   1 0.98976 2.06194   2
  -9  -9  -1 3.75306 2.32155   5
   9  -9   1 -1.3876  2.0742   6
   9   9   1 -0.0218  2.8641   6
   9   9   1 3.14188 1.91218   2
  -9   9  -1 -0.3753  3.0545   6
  -9   9  -1 1.03322 1.85804   5
  -9   9  -1 0.94226 1.57209   3
   9   9   1 -0.7342  1.8659   4
  10  -9   1 80.2686  8.9681   2
 -10  -9  -1 75.8368  7.7811   5
  10  -9   1 60.6806 10.8051   6
 -10  -9  -1 63.1373  7.1485   3
  10  -9   1 79.5207  8.1212   4
 -10   9  -1 68.9742 11.7249   6
  10   9   1 73.6759  8.3161   2
  10   9   1 65.1038  7.9669   4
 -10   9  -1 73.1670  7.7958   5
 -10   9  -1 71.6798  7.6866   3
  11  -9   1 -1.0310  2.4106   6
  11  -9   1 -2.5140  2.0003   2
 -11  -9  -1 -0.4480  2.2395   3
 -11  -9  -1 -2.0891  2.2546   5
 -11   9  -1 1.32934 2.39156   5
 -11   9  -1 -3.3797  1.7529   3
  11   9   1 1.82261 2.29524   2
  11   9   1 -0.6222  2.3423   4
  12  -9   1 17.9261  4.7872   2
 -12  -9  -1 20.4482  4.5611   5
  12  -9   1 10.5646  5.1615   6
  12   9   1 21.7875  4.6342   4
 -12   9  -1 22.7073  4.4893   3
  12   9   1 32.1759  5.3315   2
 -12   9  -1 21.8463  4.4977   5
 -13  -9  -1 8.03978 3.59793   5
  13  -9   1 -0.4431  3.0088   2
  13  -9   1 -0.0064  3.0240   6
  13   9   1 5.28841 3.34480   4
 -13   9  -1 2.87441 2.80980   5
 -13   9  -1 3.71134 2.74333   3
  14  -9   1 10.6920  3.5608   6
  14  -9   1 -0.3446  3.6775   2
 -14   9  -1 10.7767  3.8179   5
 -14   9  -1 0.77800 2.58306   3
  14   9   1 4.02997 3.87724   4
  15  -9   1 -6.3126  2.8657   2
 -15   9  -1 -1.3141  3.1323   5
  15   9   1 1.63807 3.51397   4
 -15   9  -1 -1.0943  3.0004   3
  15 -10  -1 1.18427 4.08509   2
 -15  10   1 -0.2491  3.1757   5
 -15  10   1 -2.5113  3.0549   3
  14 -10  -1 3.87648 4.18816   2
 -14  10   1 3.08321 2.88999   3
 -14  10   1 0.96288 2.57463   5
  14  10  -1 3.48524 3.64708   4
  13 -10  -1 3.93828 3.33163   2
  13 -10  -1 -1.4354  3.2371   6
 -13  10   1 -1.6269  2.3119   3
  13  10  -1 -2.7790  2.1653   4
 -13  10   1 -0.7060  2.5466   5
 -12 -10   1 7.92282 3.57944   5
  12 -10  -1 4.31239 3.31529   2
 -12 -10   1 -0.5513  2.6055   3
  12 -10  -1 0.94882 3.39988   4
  12 -10  -1 0.03341 3.38881   6
 -12  10   1 2.57405 2.39974   3
 -12  10   1 -1.7381  2.2448   5
  12  10  -1 0.54658 2.50662   4
  11 -10  -1 25.5329  5.3568   2
 -11 -10   1 16.3851  4.1520   3
 -11 -10   1 21.8979  4.4631   5
  11 -10  -1 25.2544  6.3030   6
  11 -10  -1 13.5937  4.1558   4
  11  10  -1 19.5038  4.5653   4
 -11  10   1 14.5525  3.4611   3
 -11  10   1 15.2941  3.7691   5
 -11  10   1 13.9715  5.8943   6
  10 -10  -1 38.3206  8.3273   6
  10 -10  -1 58.9639  7.3800   2
 -10 -10   1 45.8860  6.0712   3
 -10 -10   1 50.0950  6.3990   5
  10 -10  -1 49.4193  6.8128   4
 -10  10   1 53.2892  9.6444   6
 -10  10   1 49.6466  6.2523   5
 -10  10   1 53.4226  6.4429   3
  10  10  -1 55.9361  7.0909   4
   9 -10  -1 10.1082  3.4677   4
   9 -10  -1 8.52010 3.97671   6
   9 -10  -1 20.3989  4.3378   2
  -9 -10   1 10.6258  3.2627   5
  -9 -10   1 14.8845  3.2592   3
  -9  10   1 11.9114  2.9979   5
  -9  10   1 10.8456  3.5280   2
   9  10  -1 10.9144  3.1014   2
  -9  10   1 13.3138  3.2481   3
  -9  10   1 10.6071  4.6799   6
   9  10  -1 12.1295  3.6352   4
   8 -10  -1 21.3176  3.8922   4
   8 -10  -1 17.6092  5.0472   6
  -8 -10   1 17.2608  3.5572   5
  -8 -10   1 22.8502  3.6820   3
   8 -10  -1 18.8035  3.9611   2
   8  10  -1 25.1856  4.0621   2
  -8  10   1 19.2393  3.5234   5
  -8  10   1 20.6663  4.3019   2
  -8  10   1 18.3575  5.9012   6
  -8  10   1 13.9390  3.0535   3
   8  10  -1 24.1977  4.3411   4
   7 -10  -1 -0.5480  1.5259   4
   7 -10  -1 3.04389 2.18937   2
  -7 -10   1 -0.3031  1.6017   5
   7 -10  -1 0.76852 2.00852   6
  -7 -10   1 4.35385 2.01465   3
  -7  10   1 0.96361 1.60254   3
   7  10  -1 5.67615 3.16468   6
  -7  10   1 1.33737 1.72595   5
  -7  10   1 -0.9204  2.9118   6
   7  10  -1 2.19623 1.65184   2
  -7  10   1 0.84735 1.87521   2
   7  10  -1 1.80439 1.68722   4
   6 -10  -1 43.8538  5.2558   4
   6 -10  -1 31.5305  6.8878   6
  -6 -10   1 40.7544  4.9071   5
  -6 -10   1 41.8408  4.7051   3
   6 -10  -1 42.0068  5.6913   2
   6  10  -1 50.5775  5.9212   4
  -6  10   1 40.8427  4.7824   3
   6  10  -1 38.1467  6.9724   6
  -6  10   1 51.1902  5.1839   5
  -6  10   1 54.7452  6.3852   2
  -6  10   1 36.1727  7.6278   6
   6  10  -1 39.6159  5.1845   2
   5 -10  -1 35.8631  6.7512   6
   5 -10  -1 46.5583  5.6779   2
   5 -10  -1 31.7848  4.5934   4
  -5 -10   1 41.1556  4.3830   3
  -5 -10   1 32.8419  4.2026   5
  -5  10   1 35.1209  5.0181   2
   5  10  -1 31.9336  4.8312   4
  -5  10   1 48.1907  4.6504   5
   5  10  -1 45.6208  5.1832   2
   5  10  -1 25.5729  5.8768   6
  -5  10   1 42.3397  4.4837   3
  -5  10   1 39.8108  7.4163   6
  -4 -10   1 13.0407  2.4367   5
   4 -10  -1 7.45856 3.20196   6
   4 -10  -1 15.6012  3.0374   2
  -4 -10   1 14.5380  2.4747   3
   4 -10  -1 7.35042 2.33844   4
  -4  10   1 14.2753  4.3394   6
  -4  10   1 6.91058 1.80096   5
   4  10  -1 3.20433 3.27025   6
  -4  10   1 10.7475  2.0498   3
  -4  10   1 13.4907  3.0135   2
   4  10  -1 12.5543  2.6412   2
   4  10  -1 14.8804  2.9757   4
   3 -10  -1 10.7363  2.7061   2
   3 -10  -1 6.43591 2.88377   6
  -3 -10   1 11.3728  2.1310   3
  -3 -10   1 8.04613 1.92430   5
   3 -10  -1 7.43779 2.14404   4
  -3  10   1 8.68141 1.71787   3
   3  10  -1 9.23623 2.42319   4
   3  10  -1 8.04900 2.20650   2
   3  10  -1 4.16344 3.31619   6
  -3  10   1 7.28978 1.61383   5
   3  10  -1 6.73071 1.60291   5
  -3  10   1 9.83383 2.47451   2
  -3  10   1 4.43428 3.26665   6
   3  10  -1 9.75994 1.79265   3
  -2 -10   1 102.171   7.957   5
  -2 -10   1 107.842   7.912   3
   2 -10  -1 112.449   8.634   4
   2 -10  -1 112.165   9.161   2
   2  10  -1 113.938   8.915   2
   2  10  -1 99.9846  7.6051   3
   2  10  -1 115.116  12.765   6
  -2  10   1 100.059   7.558   5
  -2  10   1 104.373   7.517   3
  -2  10   1 112.577  13.499   6
  -2  10   1 125.203   9.298   2
   2  10  -1 107.078   7.786   5
   1 -10  -1 115.177   9.037   4
  -1 -10   1 113.384   8.257   3
  -1 -10   1 113.830   8.383   5
  -1 -10   1 129.883   9.389   4
  -1  10   1 108.363   7.779   3
   1  10  -1 119.654  13.381   6
  -1  10   1 106.708  13.403   6
   1  10  -1 120.506   8.090   3
   1  10  -1 109.624   9.165   2
  -1  10   1 113.090   7.907   5
  -1  10   1 112.225   9.313   2
   1  10  -1 108.622   8.097   5
   0 -10   1 165.236  11.109   3
   0 -10  -1 156.479  10.665   3
   0 -10  -1 159.974  11.956   4
   0 -10  -1 161.342  10.799   5
   0 -10   1 169.862  11.983   4
   0 -10   1 159.430  11.176   5
   0  10  -1 160.106  10.962   5
   0  10   1 161.775  10.514   3
   0  10   1 156.506  12.266   2
   0  10  -1 156.620  10.803   3
   0  10   1 157.126  10.616   5
   0  10   1 133.656  17.233   6
   0  10  -1 173.757  12.360   2
   0  10  -1 146.364  17.476   6
  -1 -10  -1 87.2549  7.4058   4
   1 -10   1 91.9543  7.5333   2
  -1 -10  -1 80.9397  5.9943   3
   1 -10   1 82.3421  7.0088   4
  -1 -10  -1 86.8197  6.1040   5
  -1  10  -1 83.0698  7.2540   2
   1  10   1 89.9657 11.3545   6
   1  10   1 91.6861  7.4479   2
   1  10   1 73.1283  5.8365   5
  -1  10  -1 75.7319  6.1504   3
  -1  10  -1 79.9320  6.2907   5
   1  10   1 91.3222  5.9336   3
  -1  10  -1 85.6155 11.2289   6
   2 -10   1 13.9125  2.5349   4
  -2 -10  -1 11.6536  2.9517   4
   2 -10   1 8.65166 3.08968   6
  -2 -10  -1 10.6430  1.7859   5
  -2 -10  -1 10.5063  1.7081   3
   2 -10   1 8.75379 2.61456   2
   2  10   1 18.4241  3.1760   2
  -2  10  -1 7.89406 3.66936   6
   2  10   1 12.3422  4.3897   6
  -2  10  -1 12.3127  2.0807   3
  -2  10  -1 11.1649  2.5747   2
  -2  10  -1 11.4325  1.9996   5
  -3 -10  -1 -0.1587  0.9664   3
   3 -10   1 1.67707 1.72873   2
   3 -10   1 -1.3214  1.2957   6
   3 -10   1 1.18748 1.33534   4
  -3 -10  -1 -1.4368  0.8556   5
  -3  10  -1 -0.5245  0.9258   5
  -3  10  -1 1.25692 1.22553   3
  -3  10  -1 0.28244 1.26578   2
  -3  10  -1 1.97925 3.33116   6
   3  10   1 0.79268 3.09169   6
   3  10   1 1.02816 1.60223   2
  -4 -10  -1 9.35786 1.98388   5
   4 -10   1 8.95387 2.29214   4
   4 -10   1 8.13162 3.16166   6
   4 -10   1 12.3186  2.7555   2
  -4  10  -1 13.2940  2.4420   5
   4  10   1 10.5559  4.2816   6
   4  10   1 11.8447  2.7810   2
   4  10   1 6.95627 2.22708   4
  -4  10  -1 18.0847  2.6731   3
  -4  10  -1 9.68955 2.54958   2
  -4  10  -1 11.7233  4.1385   6
   5 -10   1 12.0135  2.6368   4
   5 -10   1 10.2120  2.7811   2
  -5 -10  -1 11.2113  2.2242   5
   5 -10   1 11.2744  3.9232   6
  -5  10  -1 7.15587 2.57305   2
  -5  10  -1 12.6944  2.4954   5
  -5  10  -1 12.9120  2.5217   3
   5  10   1 10.8905  2.7998   4
  -5  10  -1 11.1593  4.0991   6
   5  10   1 7.90138 2.50088   2
   5  10   1 12.0746  4.0165   6
   6 -10   1 15.4353  3.3814   2
   6 -10   1 16.1002  3.2291   4
   6 -10   1 11.7123  3.8752   6
  -6 -10  -1 15.2202  2.7432   5
  -6  10  -1 12.5693  2.7306   5
   6  10   1 13.4687  4.1874   6
  -6  10  -1 15.0690  3.0434   3
   6  10   1 12.1486  3.0973   4
   6  10   1 15.8580  3.3730   2
  -6  10  -1 20.0371  5.0946   6
  -6  10  -1 13.1510  3.2290   2
   7 -10   1 0.97974 2.14452   6
  -7 -10  -1 1.76440 1.70952   5
   7 -10   1 -0.2928  1.8619   4
   7 -10   1 0.91110 1.99532   2
   7  10   1 2.89148 1.89106   2
  -7  10  -1 0.13911 1.56982   3
  -7  10  -1 0.37358 1.61530   5
  -7  10  -1 1.66115 3.29178   6
   7  10   1 -0.9074  1.3229   4
  -7  10  -1 3.60156 2.09770   2
   7  10   1 2.20175 3.13698   6
   8 -10   1 7.01564 2.84839   4
   8 -10   1 13.7641  3.3901   2
  -8 -10  -1 11.2557  2.9496   5
   8 -10   1 9.36986 3.70441   6
  -8  10  -1 14.3693  3.1571   5
  -8  10  -1 7.73573 3.15163   2
   8  10   1 10.2868  4.2966   6
  -8  10  -1 15.1808  3.0643   3
  -8  10  -1 7.44966 4.56299   6
   8  10   1 11.3318  2.9723   2
   8  10   1 19.6953  3.8533   4
   9 -10   1 1.45251 2.37723   4
   9 -10   1 2.62831 2.85918   6
   9 -10   1 6.92906 3.09480   2
  -9  10  -1 4.48087 2.20693   5
   9  10   1 9.39636 2.90899   2
  -9  10  -1 -0.5763  1.5524   3
   9  10   1 7.10464 3.73984   6
   9  10   1 3.76384 2.58651   4
  -9  10  -1 7.59491 4.35289   6
  10 -10   1 0.41923 2.97212   6
  10 -10   1 1.06635 2.83696   2
  10 -10   1 -0.4481  2.3459   4
 -10  10  -1 0.99447 3.65761   6
  10  10   1 -1.5656  1.8526   4
 -10  10  -1 1.16895 1.84385   5
 -10  10  -1 0.09882 2.12262   3
  10  10   1 4.32550 2.59875   2
  11 -10   1 -0.3911  2.4136   2
  11 -10   1 0.25163 2.63106   6
  11  10   1 1.37672 2.34255   4
 -11  10  -1 -0.4822  1.9260   5
  11  10   1 -0.0529  2.1837   2
 -11  10  -1 0.35607 1.96686   3
  12 -10   1 2.78390 3.31078   2
  12 -10   1 -0.0478  3.2304   6
 -12  10  -1 2.14278 2.58349   5
 -12  10  -1 -3.4363  2.0442   3
  12  10   1 0.70066 2.96774   4
  13 -10   1 -0.9790  3.1349   2
  13 -10   1 -1.6962  3.1784   6
 -13  10  -1 0.61738 2.67894   3
 -13  10  -1 1.26747 2.73767   5
  13  10   1 1.34965 3.19147   4
  14 -10   1 -0.8766  3.6593   2
  14 -10   1 2.19041 3.02464   6
 -14  10  -1 0.00152 2.33304   3
  14  10   1 2.07371 3.64732   4
 -14  10  -1 3.64217 3.34636   5
  15  10   1 -1.1288  3.1231   4
  14 -11  -1 -0.0673  3.4080   2
  14 -11  -1 0.10084 3.53722   6
 -14  11   1 0.29894 3.24323   5
  14  11  -1 1.74328 3.77401   4
 -14  11   1 3.24751 3.35805   3
  13 -11  -1 2.59528 3.25855   2
  13 -11  -1 5.00410 4.49235   6
  13  11  -1 -3.4437  2.5605   4
 -13  11   1 1.12037 2.80453   5
 -13  11   1 -3.8124  2.6239   3
  12 -11  -1 -1.9168  2.9365   2
  12 -11  -1 1.46404 3.90820   6
 -12  11   1 1.05950 4.29113   6
  12  11  -1 5.40833 3.15692   4
 -12  11   1 3.04304 2.65679   5
 -12  11   1 -2.2796  2.4681   3
  11 -11  -1 0.65243 2.92890   6
  11 -11  -1 5.75481 3.30690   2
  11 -11  -1 2.27436 3.17662   4
 -11  11   1 3.22792 4.84801   6
 -11  11   1 1.65643 2.10522   3
  11  11  -1 4.79993 2.85456   4
 -11  11   1 5.71135 2.98162   5
  10 -11  -1 -2.7276  1.8567   2
  10 -11  -1 -3.3583  2.2045   4
  10 -11  -1 -1.0180  2.1237   6
 -10  11   1 2.28003 2.34066   3
  10  11  -1 -2.2420  1.6744   4
 -10  11   1 -3.6042  3.6501   6
 -10  11   1 -1.6013  1.7783   5
   9 -11  -1 7.40411 3.87031   6
  -9 -11   1 13.0525  3.5850   5
   9 -11  -1 10.1736  3.2348   4
   9 -11  -1 11.8806  3.5214   2
  -9  11   1 14.5215  5.8066   6
  -9  11   1 15.0858  3.5028   5
   9  11  -1 12.9349  3.4273   2
   9  11  -1 15.7200  3.8601   4
  -9  11   1 12.6890  3.7699   2
  -9  11   1 11.1134  2.9812   3
   8 -11  -1 9.37303 4.04736   6
  -8 -11   1 13.9529  3.2893   5
   8 -11  -1 15.1340  3.7070   4
   8 -11  -1 13.6414  3.7263   2
  -8  11   1 13.8465  3.1569   3
  -8  11   1 16.9175  5.3496   6
  -8  11   1 16.5392  4.0501   2
   8  11  -1 9.60430 3.11597   4
  -8  11   1 10.8307  2.8927   5
   8  11  -1 13.0337  3.2497   2
  -7 -11   1 40.0248  4.9993   5
   7 -11  -1 41.4335  5.9316   2
   7 -11  -1 48.2601  5.8412   4
  -7 -11   1 34.2307  4.6598   3
   7 -11  -1 39.8362  7.7739   6
   7  11  -1 35.0768  5.3042   4
  -7  11   1 38.8798  4.9688   3
   7  11  -1 41.4894  5.4936   2
  -7  11   1 39.3884  5.8695   2
   7  11  -1 39.6232  7.0183   6
  -7  11   1 45.2843  5.1233   5
  -7  11   1 30.9488  7.1928   6
   6 -11  -1 12.8183  3.1371   4
  -6 -11   1 7.08119 2.18260   3
  -6 -11   1 9.02300 2.62315   5
   6 -11  -1 8.14528 3.33468   6
   6 -11  -1 9.77244 2.70770   2
   6  11  -1 6.99108 3.80107   6
   6  11  -1 7.69051 2.59288   2
  -6  11   1 7.10943 2.14201   5
   6  11  -1 11.4703  2.9822   4
  -6  11   1 7.39380 2.18526   3
  -6  11   1 3.76196 4.01995   6
  -6  11   1 14.9729  3.5497   2
   5 -11  -1 -1.6617  1.8079   6
   5 -11  -1 -0.7114  1.5148   2
  -5 -11   1 -1.1381  1.4526   5
   5 -11  -1 -1.4632  1.3099   4
  -5 -11   1 -1.7926  1.1133   3
  -5  11   1 0.07048 1.37838   5
  -5  11   1 -1.1624  1.7036   2
  -5  11   1 -0.5138  2.6571   6
   5  11  -1 0.28953 1.42092   4
   5  11  -1 2.17763 2.64584   6
   5  11  -1 0.16227 1.51672   2
   4 -11  -1 9.50116 2.64673   2
  -4 -11   1 10.1449  2.2896   5
  -4 -11   1 6.15008 1.92211   3
   4 -11  -1 11.6803  2.6735   4
   4 -11  -1 9.55520 3.65553   6
  -4  11   1 9.80343 2.00277   3
  -4  11   1 9.59763 2.01618   5
   4  11  -1 9.70146 3.90463   6
   4  11  -1 6.27816 2.26132   4
  -4  11   1 11.7055  2.8757   2
   4  11  -1 8.91616 2.55958   2
  -4  11   1 10.5883  4.0772   6
  -3 -11   1 51.0426  4.8790   3
   3 -11  -1 46.2860  6.0039   2
   3 -11  -1 47.1351  5.4320   4
  -3 -11   1 42.6936  4.7110   5
   3 -11  -1 40.6217  7.6017   6
  -3  11   1 41.6813  7.6855   6
   3  11  -1 48.0240  4.1084   3
  -3  11   1 49.5390  4.1673   3
  -3  11   1 42.7366  5.7554   2
   3  11  -1 39.5656  7.3442   6
   3  11  -1 54.7700  5.9413   2
   3  11  -1 50.9962  4.1941   5
  -2 -11   1 12.3407  2.3029   3
   2 -11  -1 16.0159  2.9789   4
   2 -11  -1 10.6816  2.7577   2
  -2 -11   1 20.3868  2.7679   5
   2  11  -1 17.2887  3.2167   2
   2  11  -1 16.7488  2.4210   5
   2  11  -1 18.5765  2.4211   3
   2  11  -1 14.4479  4.4960   6
  -2  11   1 16.2672  3.3061   2
  -2  11   1 13.1487  4.9174   6
  -1 -11   1 39.3441  5.0767   4
  -1 -11   1 39.3722  4.1667   3
  -1 -11   1 32.4946  3.9992   5
   1 -11  -1 34.3569  4.7179   4
   1  11  -1 31.4310  6.3664   6
   1  11  -1 38.0146  3.8989   3
  -1  11   1 52.0682  5.8244   2
  -1  11   1 29.0118  6.5601   6
   1  11  -1 43.9916  3.6234   5
   1  11  -1 38.1399  5.0258   2
   0 -11   1 56.8643  4.9101   5
   0 -11   1 50.6997  6.0096   4
   0 -11   1 64.5164  5.0225   3
   0 -11  -1 66.2355  6.7346   4
   0  11   1 48.4682  6.2023   2
   0  11  -1 52.1745  4.5387   3
   0  11  -1 42.0939  8.1401   6
   0  11  -1 64.1174  6.6266   2
   0  11  -1 61.2429  4.7369   5
   0  11   1 50.1194  8.4303   6
   1 -11   1 94.8844  8.5023   2
  -1 -11  -1 99.3954  8.5444   4
   1 -11   1 96.5645  8.0786   4
  -1  11  -1 98.1269 12.4171   6
  -1  11  -1 100.871   8.554   2
   1  11   1 105.252   8.609   2
   1  11   1 90.4254 12.1498   6
  -1  11  -1 111.163   7.538   5
  -1  11  -1 91.3964  7.2154   3
   2 -11   1 15.7846  4.6450   6
   2 -11   1 23.4287  3.7737   4
  -2 -11  -1 26.8378  4.2281   4
   2 -11   1 28.9138  4.3053   2
  -2  11  -1 22.7660  5.4372   6
  -2  11  -1 23.0652  3.0894   3
  -2  11  -1 28.9300  4.2148   2
   2  11   1 26.7260  4.0902   2
   2  11   1 20.8118  5.4691   6
  -2  11  -1 24.1771  3.1788   5
   3 -11   1 36.7227  4.5548   4
   3 -11   1 32.4175  4.5948   2
   3 -11   1 29.9162  5.9898   6
  -3  11  -1 41.7821  5.2699   2
   3  11   1 29.0227  6.4769   6
  -3  11  -1 23.9184  5.8925   6
  -3  11  -1 31.9813  3.8514   3
   3  11   1 34.0511  4.7122   2
  -3  11  -1 32.2746  3.9346   5
   4 -11   1 28.7026  4.0517   4
   4 -11   1 24.9802  5.8762   6
   4 -11   1 26.8546  4.4433   2
  -4  11  -1 33.6463  4.1445   5
  -4  11  -1 42.9206  5.4188   2
   4  11   1 46.4084  5.3907   2
  -4  11  -1 22.5320  5.8581   6
  -4  11  -1 38.3833  4.2746   3
   4  11   1 33.7663  6.5126   6
   5 -11   1 0.95108 1.90645   4
   5 -11   1 -0.3360  2.1868   6
   5 -11   1 -0.0597  1.4910   2
  -5  11  -1 1.41480 1.51069   5
   5  11   1 -0.7905  3.0416   6
   5  11   1 1.18386 1.49451   2
  -5  11  -1 -0.6066  1.2008   3
  -5  11  -1 1.76639 1.77385   2
  -5  11  -1 -1.1596  2.5523   6
   5  11   1 1.64192 1.81704   4
   6 -11   1 9.23290 2.96013   2
   6 -11   1 7.26834 3.49445   6
   6 -11   1 13.4141  3.0089   4
   6  11   1 10.9964  3.1179   4
  -6  11  -1 10.5826  2.5972   5
   6  11   1 6.20639 3.67598   6
  -6  11  -1 11.4206  2.6375   3
  -6  11  -1 5.72338 2.50191   2
  -6  11  -1 9.43981 4.15347   6
   6  11   1 11.2505  2.8356   2
   7 -11   1 17.0174  3.9358   2
   7 -11   1 23.8434  3.8834   4
   7 -11   1 21.6312  5.4359   6
  -7  11  -1 19.0697  3.5210   3
   7  11   1 20.2865  4.3209   4
   7  11   1 19.8294  5.3531   6
  -7  11  -1 15.8724  5.3799   6
  -7  11  -1 24.3005  3.8201   5
   7  11   1 27.0092  4.4996   2
  -7  11  -1 24.6160  4.4902   2
   8 -11   1 8.15822 3.01767   2
   8 -11   1 7.65775 3.93095   6
   8 -11   1 5.80913 2.91416   4
   8  11   1 7.93265 2.88962   2
  -8  11  -1 7.51805 3.12229   2
  -8  11  -1 8.83745 2.81467   3
   8  11   1 10.9692  3.9774   6
  -8  11  -1 10.4692  4.6464   6
   8  11   1 8.03480 2.89487   4
  -8  11  -1 7.79454 2.68639   5
   9 -11   1 18.0776  5.5094   6
   9 -11   1 32.0253  5.4227   2
   9 -11   1 24.9341  4.4938   4
   9  11   1 24.5727  6.3935   6
  -9  11  -1 19.7428  4.5826   2
  -9  11  -1 28.0027  7.2849   6
   9  11   1 33.0995  5.3873   4
  -9  11  -1 23.6315  4.3820   5
   9  11   1 30.5801  5.0985   2
  -9  11  -1 33.3722  4.8106   3
  10 -11   1 -0.9270  2.4777   2
  10 -11   1 -0.9626  2.7131   6
 -10  11  -1 1.59119 3.65409   6
  10  11   1 2.73412 2.54059   2
 -10  11  -1 -0.7061  2.1109   5
 -10  11  -1 2.88769 2.54288   3
  10  11   1 -0.7498  2.4380   4
  11 -11   1 4.21678 2.89252   2
  11 -11   1 0.35495 3.22449   6
 -11  11  -1 1.76947 2.53811   5
 -11  11  -1 3.11483 2.74457   3
  11  11   1 3.93274 2.65826   2
  11  11   1 2.48158 2.96275   4
 -11  11  -1 3.15187 4.99688   6
  12 -11   1 -2.6251  3.2015   6
  12 -11   1 -1.2874  3.0751   2
 -12  11  -1 -1.5411  2.4902   5
 -12  11  -1 0.27954 2.19066   3
  12  11   1 2.10502 2.77722   4
  13 -11   1 1.68876 4.11530   6
  13 -11   1 1.72342 3.68678   2
 -13  11  -1 6.14935 3.61745   3
  13  11   1 3.28430 3.52696   4
 -13  11  -1 3.98029 3.11092   5
  14 -11   1 -1.4264  2.7082   6
  14 -11   1 6.43267 4.19404   2
  14  11   1 0.26652 3.62540   4
 -14  11  -1 0.24946 2.69212   5
 -14  11  -1 -1.0609  2.3699   3
  14 -12  -1 -1.8822  4.0433   6
  14 -12  -1 1.15753 3.78861   2
 -14  12   1 -1.6027  2.9954   3
  13 -12  -1 7.51211 5.18671   6
  13 -12  -1 4.58362 3.95702   2
 -13  12   1 7.72893 3.70767   3
  13  12  -1 9.05181 4.08891   4
  12 -12  -1 5.20526 3.76718   2
  12 -12  -1 -0.8816  3.3640   6
 -12  12   1 -1.8649  4.7140   6
  12  12  -1 2.98830 2.97943   4
 -12  12   1 2.85243 2.90698   3
  11 -12  -1 5.77625 2.98084   2
  11 -12  -1 -0.2229  3.2159   4
  11 -12  -1 2.57303 3.51660   6
  11  12  -1 3.19154 2.93256   4
 -11  12   1 3.96603 2.43954   3
 -11  12   1 4.93296 4.59430   6
  10 -12  -1 6.64724 3.53229   4
  10 -12  -1 3.40693 3.32276   6
  10 -12  -1 3.92587 3.06126   2
  10  12  -1 6.79612 3.06588   4
 -10  12   1 4.50075 4.30525   6
 -10  12   1 13.2343  3.5095   3
 -10  12   1 6.40941 3.66879   2
   9 -12  -1 -0.9243  2.4148   6
   9 -12  -1 0.41778 2.74471   4
   9 -12  -1 1.56526 2.74257   2
   9  12  -1 -1.3864  1.9990   4
  -9  12   1 3.38609 2.40959   3
  -9  12   1 2.22282 2.95656   2
   9  12  -1 3.70820 2.53666   2
  -9  12   1 -0.8593  3.2968   6
   8 -12  -1 73.7738  8.2649   4
   8 -12  -1 80.0854  8.9408   2
   8 -12  -1 57.7041 11.0968   6
   8  12  -1 82.6753  7.5535   2
  -8  12   1 59.9369 11.3151   6
   8  12  -1 83.7585  9.2542   4
  -8  12   1 109.586   9.113   2
   7 -12  -1 83.3684  6.9238   4
   7 -12  -1 63.3873  8.1642   2
   7 -12  -1 53.7948 10.2431   6
  -7  12   1 58.9045  7.8244   2
  -7  12   1 54.6792 10.1839   6
   7  12  -1 80.0905  8.2945   2
   7  12  -1 74.4096 10.4799   6
   7  12  -1 84.3593  8.6091   4
   6 -12  -1 7.41581 3.02081   2
   6 -12  -1 11.7950  3.0864   4
   6 -12  -1 11.3729  4.2898   6
  -6  12   1 5.54366 3.92841   6
  -6  12   1 15.2528  3.8662   2
   6  12  -1 8.21552 2.61018   2
   6  12  -1 16.0082  3.4236   4
   6  12  -1 11.8419  4.3337   6
   5 -12  -1 49.1602  6.0022   4
   5 -12  -1 59.7396  7.0279   2
   5 -12  -1 43.6013  8.2475   6
   5  12  -1 51.5286  6.3480   4
   5  12  -1 59.2573  6.5642   2
   5  12  -1 40.5989  7.5553   6
  -5  12   1 35.1932  5.6915   2
  -5  12   1 39.3140  8.0633   6
   4 -12  -1 6.16859 3.10574   6
   4 -12  -1 9.19870 2.88918   4
   4 -12  -1 2.76726 2.08712   2
   4  12  -1 4.05553 2.96273   6
   4  12  -1 4.52754 2.06120   2
  -4  12   1 6.79837 2.46223   2
  -4  12   1 8.62410 3.99648   6
   3 -12  -1 112.340  13.922   6
   3 -12  -1 104.854   9.501   2
   3 -12  -1 114.667   8.958   4
   3  12  -1 120.059   9.293   2
  -3  12   1 101.808  13.402   6
  -3  12   1 80.4292  8.8769   2
   3  12  -1 119.334  13.484   6
   2 -12  -1 5.10355 2.51288   4
   2 -12  -1 18.2448  3.6264   2
  -2 -12   1 15.3574  3.4432   4
  -2  12   1 10.1415  2.7683   2
  -2  12   1 7.62967 4.27162   6
   2  12  -1 7.75231 3.58793   6
   1 -12  -1 26.0187  4.2041   4
  -1 -12   1 33.6722  4.6980   4
  -1  12   1 26.9602  5.7981   6
   1  12  -1 19.6832  5.2286   6
  -1  12   1 27.8534  4.4096   2
   1  12  -1 27.8956  4.3821   2
   0 -12  -1 0.00369 1.57042   4
   0 -12   1 -2.6747  1.3822   4
   0  12  -1 -2.6072  1.3981   2
   0  12  -1 3.43172 2.99454   6
   0  12   1 0.44210 1.85695   2
   0  12   1 1.33485 2.83204   6
  -1 -12  -1 66.3967  7.0752   4
   1 -12   1 42.2489  5.5489   4
   1 -12   1 58.2062  6.6579   2
  -1  12  -1 56.1159  5.6408   3
  -1  12  -1 50.3582  8.4674   6
   1  12   1 68.9098  7.1544   2
  -1  12  -1 53.9143  6.4189   2
   1  12   1 37.5191  8.0431   6
  -2 -12  -1 36.2505  5.4729   4
   2 -12   1 28.2786  6.5081   6
   2 -12   1 50.4091  5.3853   4
   2 -12   1 31.8980  4.9301   2
  -2  12  -1 32.4784  3.9802   3
   2  12   1 37.7666  5.3076   2
   2  12   1 36.0401  7.0949   6
  -2  12  -1 34.4973  6.8874   6
  -2  12  -1 41.2039  5.4105   2
  -2  12  -1 49.3660  4.6615   5
   3 -12   1 32.0575  5.2090   2
   3 -12   1 48.4071  5.3715   4
  -3 -12  -1 47.1545  6.0998   4
   3 -12   1 34.2530  7.1258   6
   3  12   1 42.6000  5.7509   2
   3  12   1 37.1971  7.3386   6
  -3  12  -1 45.1709  4.7677   5
  -3  12  -1 39.4939  7.4882   6
  -3  12  -1 51.2979  6.1413   2
  -3  12  -1 52.8641  5.0262   3
   4 -12   1 8.46082 2.56982   4
   4 -12   1 3.75610 2.61351   2
   4 -12   1 4.61131 2.93553   6
   4  12   1 1.80114 3.37942   6
  -4  12  -1 4.89676 1.85721   3
   4  12   1 2.63662 2.11558   2
  -4  12  -1 -0.7685  2.7072   6
  -4  12  -1 5.26087 2.36459   2
  -4  12  -1 4.75189 2.01986   5
   5 -12   1 21.8028  4.0051   4
   5 -12   1 33.5306  6.6687   6
   5 -12   1 29.8517  4.8375   2
  -5  12  -1 33.2861  4.3822   3
  -5  12  -1 32.2392  4.1742   5
  -5  12  -1 27.4311  6.3173   6
   5  12   1 26.5429  6.3195   6
  -5  12  -1 23.7066  4.6576   2
   5  12   1 36.5713  5.3144   2
   6 -12   1 1.24704 2.01278   4
   6 -12   1 -0.4250  2.1580   2
   6 -12   1 0.28384 2.12505   6
  -6  12  -1 -1.4818  1.6219   2
   6  12   1 1.78295 3.49199   6
   6  12   1 1.56699 1.97878   2
  -6  12  -1 -1.9826  2.5932   6
   6  12   1 0.27980 1.69188   4
  -6  12  -1 1.51826 1.65940   3
  -6  12  -1 -0.2051  1.4103   5
   7 -12   1 25.5515  4.8156   2
   7 -12   1 22.2981  4.0044   4
   7 -12   1 28.8354  6.6844   6
  -7  12  -1 29.9311  5.1703   2
  -7  12  -1 25.4698  4.1232   3
   7  12   1 25.6071  4.5210   2
  -7  12  -1 32.5005  4.5411   5
   7  12   1 24.5918  6.1762   6
   7  12   1 20.7016  4.3046   4
  -7  12  -1 21.6240  6.1498   6
   8 -12   1 3.06993 2.79621   2
   8 -12   1 4.85255 2.81063   4
   8 -12   1 2.85493 2.97483   6
   8  12   1 24.7811  4.3816   2
  -8  12  -1 1.55208 1.90596   5
  -8  12  -1 7.36267 3.08786   2
   8  12   1 1.50934 2.38411   4
  -8  12  -1 8.70204 2.92847   3
   8  12   1 1.03242 3.18327   6
  -8  12  -1 1.99934 3.98951   6
   9 -12   1 8.15077 3.33121   2
   9 -12   1 2.41874 3.11145   6
   9  12   1 13.6568  3.9801   4
  -9  12  -1 7.00619 2.74476   3
  -9  12  -1 5.97728 4.49269   6
   9  12   1 14.9597  3.6993   2
  -9  12  -1 8.69455 3.77538   2
  -9  12  -1 7.59522 2.78488   5
  10 -12   1 5.92051 3.90583   6
  10 -12   1 4.98000 2.93250   2
 -10  12  -1 1.75900 2.27246   5
 -10  12  -1 6.77693 2.98148   3
 -10  12  -1 4.50698 5.09699   6
  10  12   1 7.64509 3.06524   2
  10  12   1 0.37090 2.18866   4
  11 -12   1 -0.9373  3.0821   2
  11 -12   1 0.58133 3.05418   6
 -11  12  -1 2.51490 4.52714   6
 -11  12  -1 0.42763 2.43759   3
  11  12   1 0.30350 2.40987   4
  11  12   1 0.19233 2.42759   2
 -11  12  -1 -2.4588  2.4167   5
  12 -12   1 -1.9069  2.8216   2
  12 -12   1 3.19348 3.62558   6
 -12  12  -1 -0.8204  2.5629   5
  12  12   1 6.34587 3.58662   4
 -12  12  -1 -0.6651  2.6106   3
  13 -12   1 -2.0456  2.7567   6
  13 -12   1 -4.1781  2.6316   2
 -13  12  -1 -3.0425  2.3258   3
  13  12   1 6.05545 3.67362   4
 -13  12  -1 -0.2148  2.8927   5
  14 -12   1 -3.5968  3.9413   6
 -14  12  -1 -0.4268  2.7382   3
 -14  12  -1 -2.1173  3.2222   5
  13 -13  -1 2.34772 3.50801   2
  13 -13  -1 -4.0219  3.3316   6
  13  13  -1 2.24331 3.21769   4
  12 -13  -1 1.42410 3.40802   6
  12 -13  -1 -2.6370  3.3459   2
  12  13  -1 -1.5151  2.9988   4
  11 -13  -1 2.32268 3.03761   2
  11 -13  -1 0.35163 3.47581   6
  11  13  -1 5.31430 3.13333   4
  10 -13  -1 4.17792 3.82215   6
  10 -13  -1 3.16612 3.01676   4
  10 -13  -1 3.66343 2.78180   2
 -10  13   1 4.86657 4.69355   6
  10  13  -1 5.39445 2.97755   4
 -10  13   1 8.59852 4.18662   2
   9 -13  -1 5.17067 2.77720   4
   9 -13  -1 0.57213 2.77111   6
   9 -13  -1 1.17518 2.78519   2
  -9  13   1 -0.0474  3.4504   6
  -9  13   1 5.19998 3.21297   2
   9  13  -1 2.24485 2.60646   4
   8 -13  -1 32.9421  5.3316   4
   8 -13  -1 37.0969  7.6219   6
   8 -13  -1 33.5687  5.8794   2
  -8  13   1 26.0284  7.5910   6
  -8  13   1 44.6922  6.6846   2
   8  13  -1 35.0202  5.8612   4
   7 -13  -1 5.30131 2.95340   4
   7 -13  -1 4.47821 3.55178   6
   7 -13  -1 8.72286 3.19202   2
  -7  13   1 7.96585 4.70445   6
  -7  13   1 6.58465 3.13406   2
   7  13  -1 3.27698 2.35311   4
   7  13  -1 12.6806  3.5763   2
   6 -13  -1 0.65666 2.87954   6
   6 -13  -1 -0.9712  1.6771   2
   6 -13  -1 0.38934 2.39694   4
  -6  13   1 0.13169 2.98911   6
  -6  13   1 -0.7915  1.7684   2
   6  13  -1 -1.5915  2.7476   6
   6  13  -1 -0.8298  1.4120   2
   6  13  -1 2.06792 2.25685   4
   5 -13  -1 10.9575  3.1559   2
   5 -13  -1 6.78630 2.65315   4
   5 -13  -1 1.52687 3.07262   6
   5  13  -1 3.31446 3.48268   6
  -5  13   1 4.82445 2.47158   2
   5  13  -1 1.91944 1.81805   2
  -5  13   1 1.91321 3.34619   6
   4 -13  -1 -1.0750  1.6590   4
   4 -13  -1 -1.4396  2.2712   6
   4 -13  -1 -2.3593  1.2750   2
   4  13  -1 3.42753 2.13282   2
  -4  13   1 0.01251 2.90394   6
  -4  13   1 2.32584 2.09983   2
   4  13  -1 0.77557 2.55660   6
   3 -13  -1 -1.5408  1.5621   4
   3 -13  -1 -1.0628  1.5032   2
   3 -13  -1 -0.9751  1.7497   6
   3  13  -1 2.94331 1.89505   2
   3  13  -1 0.17144 2.81332   6
  -3  13   1 0.17235 1.85606   2
  -3  13   1 3.01014 3.54630   6
   2 -13  -1 36.1502  5.6064   2
   2 -13  -1 42.6714  5.5268   4
  -2 -13   1 38.1882  5.4911   4
  -2  13   1 28.6214  4.8692   2
  -2  13   1 30.0097  7.0971   6
   2  13  -1 40.5637  5.4017   2
   2  13  -1 33.4984  6.6174   6
  -1 -13   1 22.1836  4.1000   4
   1 -13  -1 13.7721  3.3677   4
  -1  13   1 17.4556  3.7232   2
   1  13  -1 12.9310  4.7162   6
  -1  13   1 14.9008  5.2644   6
   1  13  -1 28.7357  4.4329   2
   0 -13   1 84.9011  8.7008   4
   0 -13  -1 94.1856  8.0379   4
   0  13   1 74.7837 11.5743   6
   0  13  -1 86.5149  7.8543   2
   0  13  -1 73.2548 11.4345   6
   0  13   1 82.5766  8.9720   2
   1 -13   1 7.47264 2.75690   2
   1 -13   1 6.52486 2.71984   4
  -1 -13  -1 12.3082  3.5116   4
   1  13   1 9.18387 2.75308   2
  -1  13  -1 4.61425 2.17292   2
   1  13   1 4.70145 3.50362   6
  -1  13  -1 2.18689 3.03372   6
  -2 -13  -1 38.7710  5.6822   4
   2 -13   1 43.1907  5.8677   2
   2 -13   1 42.6179  5.3687   4
   2 -13   1 37.3229  7.4252   6
   2  13   1 31.7615  7.0792   6
   2  13   1 52.7510  6.3177   2
  -2  13  -1 46.2038  5.8983   2
  -2  13  -1 26.2162  6.6307   6
  -3 -13  -1 11.0633  3.1574   4
   3 -13   1 7.44361 3.39641   6
   3 -13   1 15.1045  3.3164   4
   3 -13   1 8.97635 2.77897   2
   3  13   1 11.0254  3.0897   2
  -3  13  -1 11.5618  4.4125   6
  -3  13  -1 6.72059 2.58835   2
   3  13   1 4.80866 3.35099   6
   4 -13   1 8.56474 2.65387   4
   4 -13   1 11.9411  3.5687   2
   4  13   1 10.7068  4.2241   6
  -4  13  -1 14.1212  3.6358   2
   4  13   1 10.1292  3.1772   2
  -4  13  -1 10.7814  4.3774   6
   5 -13   1 12.8886  3.4817   2
   5 -13   1 8.03224 2.74418   4
   5 -13   1 6.14588 3.46084   6
   5  13   1 12.1174  4.7754   6
  -5  13  -1 8.60375 3.10689   2
   5  13   1 5.90727 2.53040   2
  -5  13  -1 12.2008  4.4872   6
   6 -13   1 4.38886 2.64831   4
   6 -13   1 6.68042 2.78446   2
   6 -13   1 4.35964 3.07232   6
  -6  13  -1 6.10934 2.54474   3
   6  13   1 14.6519  3.6068   2
  -6  13  -1 5.04125 2.68692   2
  -6  13  -1 6.72942 4.46625   6
   6  13   1 6.40145 4.12835   6
   7 -13   1 9.12303 3.09675   4
   7 -13   1 6.69753 3.20904   2
   7 -13   1 3.74775 3.23297   6
   7  13   1 3.08861 3.67307   6
  -7  13  -1 4.13363 3.83686   6
  -7  13  -1 8.98595 3.44538   2
   7  13   1 4.77833 2.73482   2
   7  13   1 5.83791 2.45202   4
  -7  13  -1 5.78350 2.56030   3
   8 -13   1 33.9262  5.6759   2
   8 -13   1 26.1108  4.7593   4
   8 -13   1 25.0271  6.3619   6
  -8  13  -1 26.0828  5.3007   2
   8  13   1 29.0502  5.3579   4
   8  13   1 28.5373  5.1922   2
  -8  13  -1 27.6768  7.4796   6
  -8  13  -1 42.2204  5.3544   3
   8  13   1 19.9698  6.1709   6
   9 -13   1 -0.4793  2.7351   6
   9 -13   1 0.93144 2.37889   2
   9  13   1 0.59176 2.23924   4
  -9  13  -1 -1.5528  2.6916   2
   9  13   1 3.18170 2.54912   2
  -9  13  -1 -3.0791  2.8323   6
  -9  13  -1 1.77330 2.25737   3
  10 -13   1 10.7158  4.0434   2
  10 -13   1 2.41129 3.34339   6
 -10  13  -1 13.2988  3.7123   3
  10  13   1 6.62937 3.56160   4
 -10  13  -1 6.51436 5.36621   6
  10  13   1 12.4089  3.5967   2
  11 -13   1 5.70595 4.61207   6
  11 -13   1 3.40667 3.26085   2
  11  13   1 7.54847 3.32309   4
 -11  13  -1 5.37058 3.11976   3
 -11  13  -1 2.23095 5.17061   6
  12 -13   1 2.76445 3.62963   2
  12 -13   1 3.18674 4.46995   6
 -12  13  -1 -2.7948  2.0855   3
  12  13   1 0.99737 3.43183   4
  13 -13   1 0.76106 4.01590   2
  13 -13   1 0.71252 4.32541   6
 -13  13  -1 -1.0800  3.2169   3
  13  13   1 4.06452 3.56883   4
  13 -14  -1 -2.1498  4.3917   6
  12 -14  -1 -6.7213  2.8573   2
  12 -14  -1 0.84403 3.57155   6
 -12  14   1 -1.3075  5.1066   6
  12  14  -1 -1.1629  2.8078   4
  11 -14  -1 17.3678  6.2863   6
  11 -14  -1 19.7858  5.3321   2
  11  14  -1 23.5994  5.8736   4
 -11  14   1 24.1963  7.3905   6
  10 -14  -1 2.33572 3.45488   4
  10 -14  -1 -2.0724  2.0926   2
  10 -14  -1 1.10231 2.88693   6
  10  14  -1 -0.2641  2.7227   4
 -10  14   1 -3.7570  2.8635   2
 -10  14   1 2.21137 4.95795   6
   9 -14  -1 50.1628  7.1654   2
   9 -14  -1 36.5928  5.9983   4
   9 -14  -1 36.0077  8.3279   6
  -9  14   1 36.5739  9.2215   6
  -9  14   1 42.6552  7.1605   2
   9  14  -1 29.9247  5.6540   4
   8 -14  -1 28.4285  5.1213   4
   8 -14  -1 14.6408  5.4924   6
   8 -14  -1 18.7065  4.7914   2
  -8  14   1 16.8213  5.9524   6
   8  14  -1 20.4391  4.4981   2
  -8  14   1 20.3657  4.9831   2
   8  14  -1 16.4532  4.2435   4
   7 -14  -1 -4.4994  2.3439   4
   7 -14  -1 1.88367 2.90880   6
   7 -14  -1 2.06385 2.64832   2
   7  14  -1 1.85212 2.41231   2
  -7  14   1 -0.4090  2.1022   2
   7  14  -1 -1.8769  1.7978   4
  -7  14   1 -0.4894  3.7146   6
   6 -14  -1 -0.3588  2.0814   4
   6 -14  -1 -1.7351  2.7013   6
   6 -14  -1 0.76871 2.34882   2
   6  14  -1 0.51686 2.29861   2
  -6  14   1 0.07231 3.21671   6
  -6  14   1 -1.2893  1.9175   2
   6  14  -1 -1.6519  2.9758   6
   5 -14  -1 6.93713 3.23307   2
   5 -14  -1 7.38152 3.18769   4
   5 -14  -1 2.42095 3.16161   6
   5  14  -1 10.0650  3.0521   2
  -5  14   1 2.88751 2.50416   2
   5  14  -1 8.98381 4.32081   6
  -5  14   1 -0.6863  2.9440   6
   4 -14  -1 -0.0638  2.2742   4
   4 -14  -1 1.52562 2.38358   6
   4 -14  -1 0.14736 1.90220   2
   4  14  -1 -1.1312  1.8762   2
  -4  14   1 -0.5333  2.1627   2
  -4  14   1 2.70665 3.43136   6
   4  14  -1 1.64304 2.82165   6
   3 -14  -1 15.8881  3.8489   2
  -3 -14   1 16.7847  3.9416   4
   3 -14  -1 14.3152  3.4963   4
   3 -14  -1 5.94027 3.58092   6
   3  14  -1 16.2429  5.3457   6
  -3  14   1 12.6320  5.0534   6
  -3  14   1 22.3647  4.1993   2
   3  14  -1 21.4400  4.2754   2
  -2 -14   1 2.11914 2.44249   4
   2 -14  -1 7.54275 3.16325   4
   2 -14  -1 0.11683 2.26933   2
  -2  14   1 2.13577 3.36831   6
  -2  14   1 4.81502 2.51833   2
   2  14  -1 10.1838  3.0968   2
   2  14  -1 3.22289 3.56762   6
  -1 -14   1 163.433  12.411   4
   1 -14  -1 145.988  11.950   4
   1  14  -1 142.302  17.561   6
   1  14  -1 124.828  11.888   2
  -1  14   1 141.045  17.481   6
  -1  14   1 180.002  13.005   2
   0 -14  -1 4.38394 2.75834   4
   0 -14   1 0.94937 2.40550   4
   0 -14   1 3.22212 2.08421   2
   0  14  -1 1.45398 1.87940   2
   0  14   1 5.40591 2.76256   2
   0  14   1 5.16483 3.97194   6
   0  14  -1 0.61458 2.90258   6
   1 -14   1 63.7736  6.9832   4
   1 -14   1 44.8276  8.5711   6
  -1 -14  -1 60.0015  7.3529   4
   1 -14   1 48.5810  6.4131   2
   1  14   1 33.7906  7.7539   6
  -1  14  -1 54.6386  6.8306   2
  -1  14  -1 54.7888  8.9916   6
   1  14   1 43.7329  6.3707   2
   2 -14   1 13.9345  4.6380   6
   2 -14   1 13.8538  3.5782   4
   2 -14   1 12.7705  3.3974   2
  -2 -14  -1 16.1108  4.0396   4
  -2  14  -1 14.6932  5.1950   6
   2  14   1 17.8837  4.1179   2
   2  14   1 9.45480 4.40682   6
  -2  14  -1 17.6736  4.0011   2
  -3 -14  -1 -1.0033  1.7296   4
   3 -14   1 1.15947 2.87453   6
   3 -14   1 0.28624 1.90852   2
   3 -14   1 6.30739 2.78581   4
   3  14   1 0.17872 2.86794   6
  -3  14  -1 -1.1482  2.6677   6
  -3  14  -1 -0.2104  1.9467   2
   3  14   1 1.04658 1.95890   2
   4 -14   1 9.51419 2.82801   4
  -4 -14  -1 4.40529 2.71521   4
   4 -14   1 6.13221 3.14474   2
   4 -14   1 11.4175  4.2365   6
  -4  14  -1 7.29878 4.32415   6
   4  14   1 11.9410  3.5022   2
  -4  14  -1 4.91808 2.87146   2
   4  14   1 4.71815 3.87250   6
   5 -14   1 19.0852  5.6722   6
   5 -14   1 24.0718  4.8239   2
   5 -14   1 20.9443  4.0207   4
   5  14   1 23.1739  5.9200   6
   5  14   1 22.3005  4.6490   2
  -5  14  -1 29.1495  5.1440   2
  -5  14  -1 13.1505  5.1934   6
   6 -14   1 7.61351 3.11103   2
   6 -14   1 0.67731 2.52400   4
   6 -14   1 4.17805 3.23347   6
   6  14   1 7.98799 4.54190   6
   6  14   1 12.3739  3.5969   2
  -6  14  -1 9.25265 3.54042   2
  -6  14  -1 5.02530 4.01737   6
   7 -14   1 8.42154 3.27631   2
   7 -14   1 6.58197 3.31081   4
   7 -14   1 10.6314  4.3880   6
  -7  14  -1 6.52475 4.85194   6
   7  14   1 7.66853 4.42390   6
   7  14   1 8.98825 3.35573   2
  -7  14  -1 12.0053  3.9621   2
   8 -14   1 7.48877 4.34292   6
   8 -14   1 8.55549 3.60718   2
   8  14   1 8.60054 3.26512   4
  -8  14  -1 4.39015 2.94306   2
   8  14   1 6.00536 3.18508   2
  -8  14  -1 4.47973 4.20285   6
   9 -14   1 13.5032  3.9860   2
   9 -14   1 7.11259 4.18293   6
  -9  14  -1 13.8529  4.7087   2
  -9  14  -1 10.6438  5.2435   6
   9  14   1 13.9820  4.0132   2
   9  14   1 21.4941  4.8080   4
  10 -14   1 0.42474 2.93643   6
  10 -14   1 0.74542 2.99803   2
 -10  14  -1 -3.9916  4.1346   6
  10  14   1 -1.6032  2.6181   4
  10  14   1 4.20076 2.97149   2
  11 -14   1 1.68224 3.76340   6
  11 -14   1 -2.6654  2.4465   2
 -11  14  -1 -1.0361  4.6231   6
  11  14   1 -1.2038  3.1584   4
  12 -14   1 -3.3319  3.4520   6
  12 -14   1 -2.2520  3.3169   2
 -12  14  -1 -1.5035  4.7070   6
  12  14   1 -0.2860  3.6482   4
  12 -15  -1 2.07827 3.53053   6
 -12  15   1 -0.3202  5.7568   6
  11 -15  -1 -2.4493  2.4310   2
  11 -15  -1 8.44175 5.55232   6
  11  15  -1 4.30239 3.36569   4
 -11  15   1 -0.1294  4.2566   6
  10 -15  -1 5.11969 3.73626   2
  10 -15  -1 1.16257 3.53334   6
  10  15  -1 -0.3636  2.6580   4
 -10  15   1 1.85198 4.85628   6
 -10  15   1 0.34173 3.18956   2
   9 -15  -1 3.15810 3.49625   4
   9 -15  -1 0.03838 2.41864   2
   9 -15  -1 -2.2830  2.3817   6
  -9  15   1 -1.9675  3.9019   6
   9  15  -1 -1.7307  2.4141   4
  -9  15   1 -1.5179  2.5365   2
   8 -15  -1 1.31846 3.62465   6
   8 -15  -1 0.17598 2.99838   4
   8 -15  -1 1.43550 2.43006   2
  -8  15   1 -0.3794  3.4328   6
  -8  15   1 -1.6911  2.7354   2
   8  15  -1 3.22189 2.62265   4
   7 -15  -1 -0.3835  2.6960   2
   7 -15  -1 0.11912 2.71072   6
   7 -15  -1 -3.7200  2.5707   4
  -7  15   1 2.84714 2.94823   2
  -7  15   1 2.44333 4.11340   6
   7  15  -1 -0.3940  2.2403   2
   6 -15  -1 1.46707 2.80326   4
   6 -15  -1 -2.5167  2.3066   2
   6 -15  -1 2.72151 3.55153   6
  -6  15   1 0.70267 3.29118   6
  -6  15   1 2.78399 2.34660   2
   6  15  -1 -0.5779  1.9260   2
   5 -15  -1 10.1868  3.3521   4
   5 -15  -1 11.5778  3.8130   2
   5 -15  -1 7.48257 4.07410   6
  -5  15   1 15.5952  5.8411   6
   5  15  -1 7.62067 4.47952   6
   5  15  -1 21.3940  4.6204   2
  -5  15   1 12.3868  3.8539   2
   4 -15  -1 -3.0094  2.6262   6
  -4 -15   1 1.44353 2.29357   4
   4 -15  -1 1.26032 2.67358   4
   4 -15  -1 1.07548 2.44021   2
   4  15  -1 0.59442 3.33305   6
  -4  15   1 1.64454 2.16517   2
  -4  15   1 0.39991 2.81526   6
   4  15  -1 -2.3700  1.9151   2
   3 -15  -1 8.74019 3.51828   4
   3 -15  -1 14.1583  3.9507   2
  -3 -15   1 10.5469  3.3699   4
   3 -15  -1 8.75165 4.15313   6
   3  15  -1 13.3682  3.6177   2
  -3  15   1 9.31324 4.61490   6
   3  15  -1 7.32994 3.91332   6
  -3  15   1 9.46382 3.42325   2
   2 -15  -1 -1.9426  2.2042   4
   2 -15  -1 0.15605 2.30422   2
  -2 -15   1 -1.2326  2.4026   4
  -2  15   1 -0.1716  1.8377   2
   2  15  -1 1.76616 3.50958   6
   2  15  -1 0.63588 2.17707   2
  -2  15   1 -2.6729  2.7006   6
  -1 -15   1 3.50907 2.55478   4
   1 -15  -1 4.91054 3.06774   4
   1 -15  -1 6.81390 3.14457   2
  -1  15   1 4.86619 2.53253   2
   1  15  -1 5.76044 2.80857   2
  -1  15   1 3.91242 3.56268   6
   1  15  -1 9.65934 4.69588   6
   0 -15  -1 19.3398  4.5541   4
   0 -15   1 26.6473  4.8504   4
   0  15  -1 18.3278  4.2102   2
   0  15   1 5.51077 4.53736   6
   0  15   1 21.3537  4.5657   2
   0  15  -1 20.0580  5.6559   6
   1 -15   1 1.02938 2.09830   2
   1 -15   1 0.52629 2.35686   6
  -1 -15  -1 -1.2037  2.1633   4
   1 -15   1 4.58847 2.81479   4
   1  15   1 1.93900 2.47134   2
   1  15   1 -1.6338  3.1349   6
  -1  15  -1 0.13980 2.20809   2
  -1  15  -1 3.29521 3.32808   6
   2 -15   1 -2.6256  1.4960   2
   2 -15   1 0.15569 2.41040   4
   2 -15   1 2.73926 2.97070   6
  -2 -15  -1 1.75187 2.56308   4
  -2  15  -1 0.13643 3.53564   6
   2  15   1 -0.0360  1.8603   2
  -2  15  -1 1.20452 2.27380   2
   2  15   1 4.56852 3.87650   6
  -3 -15  -1 16.8625  4.1730   4
   3 -15   1 14.5055  3.6637   2
   3 -15   1 6.19769 3.18129   4
   3 -15   1 6.27355 3.73392   6
   3  15   1 15.9322  4.0807   2
  -3  15  -1 16.9938  3.8488   2
  -3  15  -1 8.57870 4.63917   6
   3  15   1 5.36622 3.84883   6
  -4 -15  -1 2.51422 2.65015   4
   4 -15   1 1.19451 3.13414   6
   4 -15   1 -1.1331  2.0128   4
   4 -15   1 2.43835 2.76376   2
  -4  15  -1 0.46411 3.01805   6
   4  15   1 -1.5864  1.6725   2
  -4  15  -1 -1.7977  1.7579   2
   4  15   1 -0.2063  3.4650   6
   5 -15   1 37.8996  8.5207   6
  -5 -15  -1 49.0191  7.0526   4
   5 -15   1 54.3889  7.2652   2
   5 -15   1 53.8527  6.4925   4
   5  15   1 42.1703  8.7167   6
  -5  15  -1 59.7199  7.7195   2
   5  15   1 63.7702  7.7601   2
  -5  15  -1 34.9731  8.2251   6
   6 -15   1 1.35047 2.74291   4
   6 -15   1 1.73093 2.66784   6
   6 -15   1 -3.7371  1.6661   2
  -6  15  -1 -0.1925  3.1168   6
  -6  15  -1 2.76802 2.84008   2
   6  15   1 -2.2449  1.8501   2
   6  15   1 -0.2019  3.3470   6
   7 -15   1 -1.1006  2.5824   2
   7 -15   1 1.39915 2.88433   4
   7 -15   1 3.69724 3.50049   6
   7  15   1 2.61512 2.52210   2
  -7  15  -1 3.85157 3.16956   2
  -7  15  -1 3.09293 4.27673   6
   7  15   1 1.31249 4.01817   6
   8 -15   1 4.04539 2.83022   2
   8 -15   1 1.74509 3.32728   6
  -8  15  -1 0.07687 3.19303   2
   8  15   1 -0.5549  2.5418   2
  -8  15  -1 0.20931 4.23319   6
   9 -15   1 2.04684 3.07364   2
   9 -15   1 0.87759 3.49561   6
   9  15   1 2.13239 3.09116   2
  -9  15  -1 -2.0644  3.2727   6
  -9  15  -1 -1.6245  2.3931   2
  10 -15   1 17.7539  4.9408   2
  10 -15   1 16.9496  6.5236   6
 -10  15  -1 24.1942  5.8531   2
  10  15   1 29.7899  6.2497   4
 -10  15  -1 18.9798  6.8665   6
  11 -15   1 0.92148 3.24429   2
  11 -15   1 -3.8181  3.2004   6
  11  15   1 -3.5830  2.7575   4
 -11  15  -1 -1.0632  4.4123   6
  11 -16  -1 2.81515 4.37374   6
 -11  16   1 0.22588 5.34777   6
  10 -16  -1 -0.8510  3.2309   6
  10 -16  -1 -1.5403  2.6463   2
 -10  16   1 -4.2428  3.3517   2
 -10  16   1 0.47306 5.06223   6
  10  16  -1 2.35745 3.29797   4
   9 -16  -1 -2.6976  2.6790   2
   9 -16  -1 -0.9400  2.9944   6
  -9  16   1 2.10561 3.30066   2
  -9  16   1 1.26425 4.25835   6
   8 -16  -1 -1.0442  2.3703   2
   8 -16  -1 -1.3260  2.5284   4
   8 -16  -1 -3.1338  2.9764   6
  -8  16   1 -2.2266  3.1206   6
  -8  16   1 -1.2205  3.0696   2
   7 -16  -1 -0.4961  2.6941   4
   7 -16  -1 -0.5027  2.6906   6
   7 -16  -1 0.01040 2.89143   2
   7  16  -1 1.18681 2.62548   2
  -7  16   1 -1.7420  3.9395   6
  -7  16   1 2.06225 3.25946   2
   6 -16  -1 22.4914  4.7398   4
   6 -16  -1 33.3261  6.0432   2
   6 -16  -1 17.1685  6.1212   6
  -6  16   1 34.2071  5.9973   2
  -6  16   1 35.3992  7.9323   6
   6  16  -1 40.8598  6.2609   2
   5 -16  -1 6.65723 4.39915   6
   5 -16  -1 2.37338 2.60668   2
   5 -16  -1 3.48345 2.88589   4
   5  16  -1 0.67048 3.58777   6
  -5  16   1 0.43587 3.42282   6
   5  16  -1 8.85844 3.61097   2
  -5  16   1 2.61640 3.16082   2
   4 -16  -1 63.6040  7.4720   4
  -4 -16   1 54.8508  7.6760   4
   4 -16  -1 46.7950  9.8507   6
   4 -16  -1 61.7459  7.8658   2
  -4  16   1 79.7363  9.2025   2
   4  16  -1 46.6450  9.3817   6
   4  16  -1 66.8351  8.0306   2
  -4  16   1 47.0066  9.5132   6
   3 -16  -1 -0.0237  2.5492   2
  -3 -16   1 2.25745 3.02958   4
   3 -16  -1 3.01310 3.33020   6
   3 -16  -1 -0.8738  2.0456   4
  -3  16   1 -1.4506  1.7486   2
  -3  16   1 -1.1802  3.3320   6
   3  16  -1 0.34991 3.41147   6
   3  16  -1 4.88566 3.01256   2
   2 -16  -1 1.68579 2.28648   2
   2 -16  -1 2.46814 2.50314   4
   2 -16  -1 2.66613 3.30235   6
  -2 -16   1 -0.6803  2.1954   4
  -2  16   1 -0.0693  1.9594   2
   2  16  -1 0.48595 2.34967   2
  -2  16   1 0.20045 3.58094   6
   2  16  -1 -1.9635  3.3330   6
   1 -16  -1 -1.3334  2.5109   4
  -1 -16   1 -0.8225  2.2803   4
   1 -16  -1 3.93037 2.26188   2
   1  16  -1 -0.1611  2.9984   6
   1  16  -1 -0.4993  1.9079   2
  -1  16   1 -0.9590  2.2361   2
  -1  16   1 -0.7244  3.6293   6
   0 -16   1 -0.8658  2.1281   4
   0 -16  -1 -1.4641  2.1441   4
   0 -16   1 5.15320 2.77407   2
   0  16   1 -1.8747  1.7162   2
   0  16  -1 3.92374 3.65334   6
   0  16  -1 -0.1693  2.4979   2
   0  16   1 0.36589 3.71595   6
   1 -16   1 -0.0887  2.3006   4
   1 -16   1 -0.6102  2.5959   6
   1 -16   1 -1.0300  2.4138   2
  -1 -16  -1 -1.0372  2.1810   4
  -1  16  -1 1.35045 3.56359   6
   1  16   1 -0.7616  2.2398   2
   1  16   1 -1.7701  3.1497   6
  -1  16  -1 4.91249 3.00337   2
   2 -16   1 33.5738  5.8487   2
   2 -16   1 54.3344  6.7533   4
   2 -16   1 35.6552  7.8259   6
  -2 -16  -1 52.1604  7.4407   4
  -2  16  -1 41.5463  6.2927   2
   2  16   1 41.9428  6.6306   2
  -2  16  -1 36.6233  8.3155   6
   2  16   1 30.4643  7.3634   6
   3 -16   1 0.28967 2.77824   6
   3 -16   1 0.28059 2.33075   4
   3 -16   1 3.46001 2.85005   2
  -3 -16  -1 -0.1425  2.7722   4
   3  16   1 -0.8889  3.6327   6
  -3  16  -1 -0.0010  2.3445   2
   3  16   1 2.71736 2.88248   2
  -3  16  -1 4.07663 3.58157   6
   4 -16   1 50.7549  6.5443   4
   4 -16   1 31.1334  7.7418   6
  -4 -16  -1 37.7063  6.3105   4
   4 -16   1 37.4716  6.1633   2
  -4  16  -1 50.5924  7.3497   2
   4  16   1 49.1600  7.1786   2
   4  16   1 37.5261  8.2000   6
  -4  16  -1 35.4609  8.0364   6
   5 -16   1 8.62224 3.58127   2
   5 -16   1 6.91111 2.84788   4
  -5 -16  -1 6.15067 3.12579   4
   5 -16   1 2.97726 3.28351   6
  -5  16  -1 7.47904 4.14391   6
  -5  16  -1 5.72361 3.05374   2
   5  16   1 8.68609 3.61279   2
   5  16   1 -1.8710  3.4311   6
   6 -16   1 -1.5875  2.5908   4
  -6 -16  -1 3.85110 3.01706   4
   6 -16   1 6.32030 3.18446   2
   6 -16   1 6.09513 3.90407   6
  -6  16  -1 6.89059 4.26639   6
   6  16   1 11.0475  4.8998   6
   6  16   1 7.91174 3.45577   2
  -6  16  -1 2.27418 2.78627   2
   7 -16   1 0.04413 2.80005   2
   7 -16   1 1.20454 3.07263   6
   7  16   1 -1.3807  2.4926   2
  -7  16  -1 -0.7358  3.9443   6
  -7  16  -1 -1.4048  2.4062   2
   7  16   1 0.51276 3.77713   6
   8 -16   1 -4.1975  2.3832   2
   8 -16   1 1.25269 3.35389   6
   8  16   1 4.66663 3.17207   2
  -8  16  -1 3.11542 3.10554   2
  -8  16  -1 2.08128 4.58015   6
   9 -16   1 0.03169 2.49983   2
   9 -16   1 -4.0840  2.1860   6
  -9  16  -1 6.18163 4.11426   2
  -9  16  -1 3.55322 5.07671   6
   9  16   1 -0.0609  2.4176   2
  10 -16   1 6.99603 4.74735   6
  10 -16   1 7.34374 4.06792   2
 -10  16  -1 4.76983 5.57618   6
 -10  16  -1 13.1254  5.2606   2
  10 -17  -1 0.49820 3.66427   6
 -10  17   1 -2.1790  4.5870   6
   9 -17  -1 1.11798 3.38800   2
   9 -17  -1 0.21347 3.52297   6
  -9  17   1 -0.6896  4.4219   6
  -9  17   1 -2.2443  3.2664   2
   8 -17  -1 -2.3803  3.3194   4
   8 -17  -1 -1.0338  3.5356   6
   8 -17  -1 4.21210 3.20658   2
  -8  17   1 1.60726 4.08317   6
  -8  17   1 0.97297 3.57497   2
   7 -17  -1 2.24573 3.98538   6
   7 -17  -1 -2.7541  3.1169   4
   7 -17  -1 3.03893 3.36762   2
  -7  17   1 -0.2591  3.7401   6
  -7  17   1 0.31894 2.89555   2
   6 -17  -1 2.77955 2.81141   2
   6 -17  -1 2.78315 4.16156   6
   6 -17  -1 -0.1649  2.8313   4
  -6  17   1 3.19896 3.86903   6
   6  17  -1 6.61887 3.40511   2
  -6  17   1 1.10444 3.43737   2
   5 -17  -1 14.1278  5.6533   6
   5 -17  -1 11.3800  4.0229   2
  -5 -17   1 5.59375 3.32826   4
   5 -17  -1 16.7912  4.6818   4
   5  17  -1 8.79728 5.07764   6
  -5  17   1 5.59235 4.73611   6
   5  17  -1 15.6154  4.3746   2
  -5  17   1 7.87400 3.68143   2
   4 -17  -1 5.89812 3.15342   2
   4 -17  -1 10.8399  4.9143   6
   4 -17  -1 4.33693 3.27335   4
  -4 -17   1 14.8424  4.3377   4
  -4  17   1 7.52951 4.88200   6
   4  17  -1 6.52978 4.46657   6
  -4  17   1 9.54833 4.14436   2
   4  17  -1 12.7134  3.9764   2
  -3 -17   1 10.9365  3.9618   4
   3 -17  -1 11.8554  4.9844   6
   3 -17  -1 14.5685  4.4389   2
   3 -17  -1 21.2133  4.6355   4
   3  17  -1 13.8958  5.5973   6
  -3  17   1 5.33497 4.65367   6
  -3  17   1 3.86322 2.85914   2
   3  17  -1 15.1257  4.3433   2
   2 -17  -1 -0.4430  2.9384   4
  -2 -17   1 7.37091 3.70113   4
   2 -17  -1 0.51210 2.27684   2
   2 -17  -1 0.23370 3.33222   6
   2  17  -1 -3.0996  3.1992   6
   2  17  -1 0.07922 2.22957   2
  -2  17   1 3.36539 3.70800   6
  -1 -17   1 1.51066 2.76132   2
  -1 -17   1 0.01530 2.69710   4
   1 -17  -1 4.98608 2.82992   4
   1 -17  -1 -0.2453  2.4841   2
  -1  17   1 -3.3320  2.5785   6
   1  17  -1 -0.9852  3.1574   6
   1  17  -1 -1.9735  1.7960   2
  -1  17   1 -0.2603  2.1118   2
   0 -17  -1 6.59698 3.40114   4
   0 -17   1 11.1298  4.8229   6
   0 -17   1 7.83201 3.34559   4
   0  17  -1 1.95382 4.12571   6
   0  17   1 3.85503 4.33416   6
   0  17   1 11.2161  3.6926   2
   0  17  -1 7.71313 3.22556   2
   1 -17   1 0.95659 2.65543   2
   1 -17   1 -1.7632  2.7741   4
   1 -17   1 -0.6058  3.2140   6
  -1 -17  -1 2.07681 2.80917   4
  -1  17  -1 4.53003 3.87363   6
  -1  17  -1 7.92520 3.24027   2
   1  17   1 1.97869 3.63269   6
   1  17   1 3.83192 2.84891   2
   2 -17   1 10.4908  3.6358   4
   2 -17   1 6.97334 3.41867   2
  -2 -17  -1 6.39041 3.84234   4
   2 -17   1 7.63394 4.22224   6
   2  17   1 4.37314 2.94052   2
  -2  17  -1 11.0489  3.8432   2
  -2  17  -1 10.2028  5.1366   6
   2  17   1 7.55343 4.74778   6
   3 -17   1 3.67611 3.57334   6
   3 -17   1 5.06878 2.84132   4
  -3 -17  -1 5.99414 3.86154   4
   3 -17   1 2.10275 2.75618   2
  -3  17  -1 2.52132 3.27485   2
  -3  17  -1 3.18748 4.07467   6
   3  17   1 0.44124 2.38571   2
   3  17   1 5.49365 4.63967   6
   4 -17   1 11.3534  5.1563   6
  -4 -17  -1 6.16829 3.28398   4
   4 -17   1 3.82043 3.41010   2
   4 -17   1 9.55363 3.55229   4
  -4  17  -1 3.63084 3.19305   2
   4  17   1 5.54675 4.55095   6
  -4  17  -1 11.1705  5.1499   6
   4  17   1 7.46991 3.73589   2
   5 -17   1 17.4482  4.5488   2
  -5 -17  -1 18.6301  5.1653   4
   5 -17   1 17.0906  5.8187   6
   5 -17   1 18.6934  4.6748   4
  -5  17  -1 13.4091  5.5388   6
  -5  17  -1 12.5883  4.3167   2
   5  17   1 18.9286  4.9678   2
   5  17   1 19.3908  6.3062   6
   6 -17   1 6.60751 3.40082   2
  -6 -17  -1 6.95858 3.98410   4
   6 -17   1 1.43996 3.41222   6
  -6  17  -1 8.77517 5.34255   6
   6  17   1 9.57416 4.02713   2
   6  17   1 7.43914 4.78726   6
  -6  17  -1 6.55625 3.88310   2
   7 -17   1 2.25944 3.37657   6
   7 -17   1 1.35277 3.46228   2
  -7 -17  -1 2.61777 3.11530   4
   7  17   1 5.25361 3.25145   2
  -7  17  -1 2.49081 3.41380   2
  -7  17  -1 4.80122 5.10421   6
   8 -17   1 -1.1959  2.7233   2
   8 -17   1 2.06603 3.33614   6
   8  17   1 3.59696 3.76562   2
  -8  17  -1 -0.1855  2.9006   2
  -8  17  -1 -2.2329  4.3947   6
   9 -17   1 -0.0544  3.3962   6
   9 -17   1 -4.0371  3.0460   2
  -9  17  -1 0.04949 3.31073   2
  -9  17  -1 1.36893 4.83545   6
   8 -18  -1 -0.9890  3.4774   6
   8 -18  -1 -2.3427  2.4774   2
  -8  18   1 0.25976 4.29603   2
  -8  18   1 -0.7261  3.8591   6
   7 -18  -1 1.90830 3.83173   4
   7 -18  -1 -0.5817  2.9043   6
   7 -18  -1 2.12300 3.14901   2
  -7  18   1 4.06447 3.60328   2
  -7  18   1 -0.0242  3.9460   6
  -6 -18   1 -1.3715  2.5433   4
   6 -18  -1 -0.1862  3.0630   6
   6 -18  -1 4.16453 3.75081   4
   6 -18  -1 0.47185 3.00090   2
  -6  18   1 2.30773 3.33744   2
  -6  18   1 0.42187 4.28712   6
   6  18  -1 1.04516 2.94273   2
  -5 -18   1 18.6773  4.8936   4
   5 -18  -1 13.0421  5.2125   6
   5 -18  -1 14.0229  4.5051   2
   5 -18  -1 6.09613 4.16280   4
   5  18  -1 10.1361  3.9050   2
  -5  18   1 25.6470  5.8704   2
  -5  18   1 7.55026 5.29964   6
  -4 -18   1 -1.5788  2.8236   4
   4 -18  -1 3.45483 4.18760   6
   4 -18  -1 1.53679 3.05212   4
   4 -18  -1 0.14341 2.43745   2
   4  18  -1 5.35828 3.54395   2
  -4  18   1 2.78441 4.27475   6
   4  18  -1 1.78896 4.06741   6
  -4  18   1 0.17836 3.14117   2
  -3 -18   1 19.5967  5.0031   4
   3 -18  -1 15.6254  6.0379   6
   3 -18  -1 16.4103  4.6819   4
   3 -18  -1 13.7613  4.4822   2
   3  18  -1 13.3712  5.4916   6
  -3  18   1 18.7518  4.8461   2
   3  18  -1 15.2780  4.4672   2
  -3  18   1 16.0879  5.9185   6
  -2 -18   1 1.00712 2.77440   4
   2 -18  -1 -2.9485  2.8267   4
   2 -18  -1 -0.3559  2.9981   6
   2 -18  -1 0.42992 2.87711   2
   2  18  -1 1.29355 3.68758   6
   2  18  -1 -2.2361  1.9667   2
  -2  18   1 -1.7042  2.3045   2
  -2  18   1 0.69246 3.54682   6
  -1 -18   1 16.4806  4.6950   2
   1 -18  -1 29.6881  5.9075   4
   1 -18  -1 16.4109  4.9654   2
  -1 -18   1 21.2862  4.8156   4
  -1  18   1 13.6673  6.1298   6
   1  18  -1 14.1639  5.8217   6
   1  18  -1 20.0012  4.9814   2
  -1  18   1 15.6632  4.4653   2
   0 -18   1 3.34638 3.24937   4
   0 -18  -1 4.10543 3.42458   2
   0 -18   1 1.32253 2.43383   2
   0 -18  -1 0.69459 3.13224   4
   0 -18   1 3.34412 4.18004   6
   0  18   1 0.51236 3.56986   6
   0  18   1 -1.5049  2.4830   2
   0  18  -1 -1.0512  3.1769   6
   0  18  -1 0.25448 2.77179   2
  -1 -18  -1 9.58399 3.97444   4
   1 -18   1 -1.4423  2.6990   6
   1 -18   1 3.24589 2.75522   4
   1 -18   1 7.68870 3.47027   2
   1  18   1 6.11250 3.38735   2
  -1  18  -1 6.21627 3.52673   2
  -1  18  -1 3.73366 4.40537   6
   1  18   1 5.66265 4.09261   6
   2 -18   1 0.24016 2.44001   2
   2 -18   1 3.88792 4.08527   6
   2 -18   1 -3.9302  2.8290   4
  -2 -18  -1 -0.1771  2.7052   4
   2  18   1 -2.5212  2.1713   2
   2  18   1 -0.2170  3.2238   6
  -2  18  -1 3.74388 3.26621   2
  -2  18  -1 -0.7763  3.6587   6
   3 -18   1 0.41047 2.68056   4
   3 -18   1 0.43041 2.37853   2
  -3 -18  -1 4.89846 3.37355   4
   3 -18   1 4.33149 3.84886   6
   3  18   1 1.33221 3.62527   6
   3  18   1 1.68401 3.12317   2
  -3  18  -1 0.84420 3.46107   6
  -3  18  -1 -2.2318  2.6238   2
   4 -18   1 -0.0829  3.1639   4
  -4 -18  -1 0.79095 2.82246   4
   4 -18   1 5.42991 3.30578   2
   4 -18   1 -0.7161  3.9173   6
  -4  18  -1 1.20859 3.12591   2
   4  18   1 1.31721 4.05187   6
   4  18   1 1.10332 3.04964   2
  -4  18  -1 -0.9105  3.1322   6
   5 -18   1 10.3444  4.9759   6
  -5 -18  -1 10.2306  4.0993   4
   5 -18   1 17.9184  4.8943   2
   5 -18   1 13.5453  4.6043   4
  -5  18  -1 12.6272  5.6444   6
   5  18   1 11.5193  4.3459   2
   5  18   1 12.8381  5.8486   6
  -5  18  -1 15.8980  5.1851   2
   6 -18   1 3.20951 3.50145   2
   6 -18   1 -0.4210  3.1882   6
  -6 -18  -1 -2.0856  2.7363   4
   6  18   1 1.80357 4.16233   6
  -6  18  -1 -1.0860  3.3791   6
  -6  18  -1 -2.7122  2.6972   2
   6  18   1 0.13919 3.10232   2
   7 -18   1 3.38799 4.38540   6
   7 -18   1 7.76142 4.13367   2
  -7 -18  -1 4.77085 3.83033   4
  -7  18  -1 8.68806 4.44280   2
  -7  18  -1 1.67380 4.31845   6
   7  18   1 10.9798  4.3828   2
  -8 -18  -1 -2.4168  3.4133   4
   8 -18   1 0.44056 3.25821   2
   8 -18   1 -0.8320  3.0526   6
  -8  18  -1 2.91734 5.40015   6
   8  18   1 0.52538 2.71936   2
  -8  18  -1 -0.2105  3.4418   2
  -7 -19   1 1.13154 3.88896   4
   7 -19  -1 0.40616 4.14605   6
  -7  19   1 -1.8707  3.8120   6
  -6 -19   1 1.25697 3.36553   4
   6 -19  -1 2.99236 4.05321   6
   6 -19  -1 6.45492 3.33279   2
   6 -19  -1 -0.7326  3.8291   4
  -6  19   1 1.42480 3.92593   6
  -6  19   1 2.92242 3.96403   2
   5 -19  -1 2.61877 3.47151   2
   5 -19  -1 1.88058 3.21249   4
   5 -19  -1 -0.3990  3.5840   6
  -5 -19   1 6.23938 4.22106   4
  -5  19   1 3.76481 5.06646   6
   5  19  -1 0.58387 3.09123   2
  -5  19   1 4.57587 3.88333   2
  -4 -19   1 -0.3653  2.9003   4
   4 -19  -1 1.45579 4.30289   6
   4 -19  -1 2.25616 3.32628   4
   4 -19  -1 1.90021 3.15617   2
   4  19  -1 2.55548 3.44246   2
  -4  19   1 -3.1166  2.9447   6
   4  19  -1 2.27686 4.22000   6
  -4  19   1 -0.7008  3.3771   2
   3 -19  -1 4.68627 4.05195   4
   3 -19  -1 2.83866 4.04278   6
  -3 -19   1 2.69942 3.75716   4
   3 -19  -1 0.91574 2.65592   2
   3  19  -1 6.60106 3.56815   2
  -3  19   1 1.28635 2.97460   2
   3  19  -1 1.53983 4.53296   6
  -3  19   1 4.26224 4.15652   6
  -2 -19   1 2.24825 3.21363   2
   2 -19  -1 -1.1030  3.4096   4
   2 -19  -1 -0.2065  3.9134   6
   2 -19  -1 3.48643 3.08766   2
  -2 -19   1 -1.6926  2.6428   4
   2  19  -1 -3.4944  3.1371   6
   2  19  -1 -1.7609  2.5885   2
  -2  19   1 3.89375 3.83679   2
  -2  19   1 -0.1613  3.8112   6
  -1 -19   1 0.13796 3.46549   2
   1 -19  -1 12.5676  4.1526   2
   1 -19  -1 3.86106 4.21694   6
   1 -19  -1 4.05463 3.53538   4
  -1 -19   1 9.73329 5.13105   6
  -1 -19   1 3.85511 3.85333   4
  -1  19   1 17.5833  5.1200   2
  -1  19   1 8.44172 5.23833   6
   1  19  -1 6.44628 5.26348   6
   1  19  -1 9.33156 4.17395   2
   0 -19   1 10.0436  4.1464   2
   0 -19   1 5.37975 3.42817   4
   0 -19  -1 5.60046 3.91136   4
   0 -19  -1 4.23253 3.34822   2
   0 -19   1 4.18391 4.51490   6
   0  19  -1 3.83880 4.88651   6
   0  19  -1 2.30024 2.69393   2
   0  19   1 4.70995 3.76848   2
   0  19   1 0.27700 3.55214   6
  -1 -19  -1 4.83048 3.66244   4
   1 -19   1 3.18566 3.95179   4
   1 -19   1 3.47362 4.32398   6
   1 -19   1 4.05723 3.67848   2
  -1  19  -1 3.94907 4.16134   6
  -1  19  -1 5.42603 3.37829   2
   1  19   1 6.60218 3.76802   2
   1  19   1 3.85147 4.24883   6
   2 -19   1 13.0283  4.2036   4
  -2 -19  -1 13.5137  4.5164   4
   2 -19   1 2.20460 4.22829   6
   2 -19   1 6.99010 3.87919   2
   2  19   1 7.47751 4.68289   6
  -2  19  -1 8.98399 5.17340   6
   2  19   1 14.8561  4.9515   2
  -2  19  -1 1.33982 3.47016   2
   3 -19   1 0.35175 2.72404   2
   3 -19   1 0.20284 3.43480   6
   3 -19   1 -0.8254  3.1560   4
  -3 -19  -1 -0.1378  3.0971   4
  -3  19  -1 -0.9455  3.2651   2
  -3  19  -1 1.64816 3.79405   6
   3  19   1 3.02581 4.52561   6
   3  19   1 -0.1776  2.8978   2
   4 -19   1 3.97348 4.63159   6
  -4 -19  -1 4.04416 3.43768   4
   4 -19   1 2.01791 3.76750   4
   4 -19   1 3.39556 3.44225   2
  -4  19  -1 1.29072 4.33985   6
   4  19   1 -0.0779  2.6327   2
   4  19   1 -0.6643  3.4955   6
  -4  19  -1 6.86920 3.93091   2
   5 -19   1 4.01505 4.33798   6
   5 -19   1 6.98412 3.62506   2
  -5 -19  -1 1.90198 4.08985   4
  -5  19  -1 10.1085  4.5939   2
   5  19   1 4.20309 5.09982   6
  -5  19  -1 5.26601 4.29921   6
   5  19   1 6.62922 4.07178   2
   6 -19   1 0.18974 4.10988   6
   6 -19   1 -0.1452  2.9086   2
  -6 -19  -1 3.43842 3.55733   4
  -6  19  -1 1.31047 4.58620   6
  -6  19  -1 1.67092 3.26897   2
   6  19   1 5.92425 3.66170   2
  -7 -19  -1 -2.9511  3.5970   4
   7 -19   1 -1.5109  3.6316   6
   7 -19   1 -0.2595  3.1860   2
  -7  19  -1 0.85916 3.29935   2
  -7  19  -1 -0.4991  3.8294   6
   7  19   1 4.99393 3.85762   2
   6 -20  -1 2.16080 3.70678   4
   5 -20  -1 -4.4834  3.5660   4
   5 -20  -1 -1.1626  3.2408   2
   5 -20  -1 -3.0135  3.3309   6
  -5 -20   1 0.04624 3.88770   4
   5  20  -1 -1.1811  3.3346   2
  -5  20   1 -3.4292  4.2967   6
   4 -20  -1 5.51782 4.52700   4
   4 -20  -1 5.01424 5.29450   6
  -4 -20   1 6.09370 4.64413   4
   4 -20  -1 -1.4743  2.9922   2
  -4  20   1 0.99761 4.21505   6
   4  20  -1 1.96263 3.57484   2
  -4  20   1 6.05991 4.51981   2
   3 -20  -1 -2.7505  2.7166   4
   3 -20  -1 -0.1219  3.5025   6
  -3 -20   1 0.19058 3.15917   4
   3 -20  -1 0.79582 3.09238   2
   3  20  -1 -1.0868  4.2458   6
  -3  20   1 7.04802 5.22264   6
   3  20  -1 -1.4519  3.1162   2
  -3  20   1 -3.2549  3.4219   2
   2 -20  -1 2.98243 3.48491   4
   2 -20  -1 8.23917 4.23475   2
  -2 -20   1 2.88858 4.18987   4
   2 -20  -1 2.92572 4.01522   6
  -2 -20   1 6.75961 3.62449   2
   2  20  -1 -1.0592  3.6069   6
   2  20  -1 3.64304 3.72282   2
  -2  20   1 -0.7217  4.4555   6
  -2  20   1 4.89693 4.25143   2
   1 -20  -1 7.73986 5.12970   6
  -1 -20   1 8.69480 4.62353   4
   1 -20  -1 1.64018 4.01314   4
  -1 -20   1 9.32413 5.23588   6
  -1 -20   1 4.50777 3.43891   2
   1 -20  -1 5.05108 4.06908   2
   1  20  -1 4.80140 3.75532   2
  -1  20   1 9.15007 4.12841   2
  -1  20   1 3.94001 4.39115   6
   1  20  -1 6.53369 5.27993   6
   0 -20   1 2.22572 3.71710   2
   0 -20   1 -0.4019  3.0820   4
   0 -20  -1 2.97287 3.70785   4
   0 -20   1 3.04714 3.87348   6
   0 -20  -1 0.50769 3.30039   2
   0  20   1 0.42541 3.37735   2
   0  20   1 2.87091 4.22018   6
   0  20  -1 1.89066 2.96019   2
   1 -20   1 5.58943 4.28930   4
   1 -20   1 6.53634 4.70966   6
  -1 -20  -1 6.21915 3.85237   2
  -1 -20  -1 7.79048 4.40997   4
   1 -20   1 4.88897 3.17130   2
   1  20   1 3.52812 4.21326   6
   1  20   1 -0.1073  2.8981   2
  -1  20  -1 1.08212 3.94186   6
  -1  20  -1 1.61484 3.51750   2
   2 -20   1 6.05237 4.02750   2
  -2 -20  -1 6.28995 4.09961   4
   2 -20   1 11.2866  4.8417   4
   2 -20   1 0.49222 3.88880   6
  -2  20  -1 7.51541 5.48552   6
   2  20   1 2.60203 5.11509   6
  -2  20  -1 8.30146 4.11428   2
   2  20   1 14.7684  5.1165   2
   3 -20   1 0.66683 3.75359   2
   3 -20   1 0.17276 3.91711   6
  -3 -20  -1 7.99802 4.49944   4
   3 -20   1 -0.5272  3.7667   4
  -3  20  -1 3.45002 4.17238   2
   3  20   1 3.76697 3.90983   2
  -3  20  -1 1.78945 4.80439   6
   3  20   1 2.61452 4.16153   6
   4 -20   1 0.97069 3.20653   2
   4 -20   1 -4.6188  3.6009   6
  -4 -20  -1 2.77005 3.78811   4
  -4  20  -1 3.00288 4.59090   6
  -4  20  -1 1.69612 3.83450   2
   4  20   1 -0.9018  4.3891   6
   4  20   1 -2.4187  2.9550   2
   5 -20   1 -0.2749  3.5510   2
   5 -20   1 2.18005 4.74191   6
  -5 -20  -1 0.93625 3.73169   4
   5  20   1 1.73362 4.51225   6
   5  20   1 -0.6291  2.9088   2
  -5  20  -1 -3.2924  2.5225   2
  -5  20  -1 0.91493 3.68006   6
   6  20   1 1.48739 3.81225   2
   5 -21  -1 0.11334 4.96744   4
   4 -21  -1 -4.2108  3.8677   4
   4  21  -1 -3.7997  3.1431   2
  -3 -21   1 -0.5551  2.9078   2
   3 -21  -1 5.68400 4.24698   4
  -3 -21   1 6.65941 4.16769   4
   3  21  -1 9.72233 4.70764   2
   3  21  -1 -0.6290  4.8823   6
  -2 -21   1 8.96608 5.79909   6
  -2 -21   1 5.61979 4.24119   2
  -2 -21   1 1.32464 4.22390   4
   2 -21  -1 9.49163 4.70021   2
   2 -21  -1 3.51154 4.75778   4
   2 -21  -1 5.16313 5.56849   6
  -2  21   1 8.39941 5.27594   6
   2  21  -1 1.10284 3.57804   2
   2  21  -1 1.55969 4.05562   6
   1 -21  -1 3.67067 4.37268   2
  -1 -21   1 9.35117 4.16008   2
   1 -21  -1 4.22767 4.02238   4
   1 -21  -1 6.47433 5.78014   6
  -1 -21   1 4.55081 4.66343   4
  -1 -21   1 3.13391 4.48577   6
  -1  21   1 5.64740 4.45787   2
  -1  21   1 -1.4684  3.9812   6
   1  21  -1 6.99079 5.55492   6
   1  21  -1 -0.7110  3.5603   2
   0 -21   1 18.4535  5.5338   2
   0 -21   1 16.0337  7.1731   6
   0 -21  -1 17.6702  5.4169   2
   0 -21  -1 7.34307 5.96188   6
   0 -21   1 24.0870  6.3218   4
   0 -21  -1 17.4732  5.3678   4
   0  21   1 17.7733  6.7377   6
   0  21  -1 16.5483  5.7234   2
   0  21  -1 15.8458  6.3529   6
   0  21   1 24.3398  6.2697   2
   1 -21   1 -6.8669  3.6175   4
  -1 -21  -1 -3.2082  3.3716   4
   1 -21   1 4.46142 4.20389   2
   1 -21   1 2.36433 4.92762   6
  -1 -21  -1 3.98863 4.26459   2
   1  21   1 -0.5172  4.9374   6
  -1  21  -1 -2.2347  3.4266   6
   1  21   1 1.70933 3.40230   2
  -1  21  -1 0.75775 3.27470   2
   2 -21   1 11.2304  6.7288   6
   2 -21   1 13.0065  4.9748   4
  -2 -21  -1 11.0533  4.8156   4
  -2 -21  -1 12.6760  5.1003   2
   2 -21   1 11.7416  4.7980   2
  -2  21  -1 13.6823  5.2907   2
  -2  21  -1 13.9647  6.6879   6
   2  21   1 11.8608  6.5175   6
   3 -21   1 4.79949 4.79826   4
   3  21   1 -2.3587  2.6741   2
   3  21   1 5.84900 5.51403   6
   4  21   1 -0.5796  3.7715   6
   1 -22   1 12.7239  5.3195   4
   2 -22   1 6.72863 5.27797   4
  17   0  -2 2.09110 4.01529   4
 -16   0   2 5.96220 4.10385   5
  16   0  -2 -0.9323  2.7707   4
 -16   0   2 -0.0419  2.9341   3
 -15   0   2 -0.0245  2.4342   5
 -15   0   2 0.49740 2.98973   3
  15   0  -2 1.16522 3.02248   4
  14   0  -2 3.32302 2.74758   4
 -14   0   2 -1.0609  2.1485   3
 -14   0   2 -0.4613  2.5769   5
 -13   0   2 0.30493 2.04628   5
 -13   0   2 -2.6104  1.8979   3
  13   0  -2 -1.3111  1.9025   4
 -12   0   2 6.41466 2.74627   5
  12   0  -2 10.1231  3.1591   2
  12   0  -2 10.3968  3.4172   4
 -12   0   2 5.27981 2.85535   3
  11   0  -2 -2.8741  1.5061   4
 -11   0   2 -0.9375  1.7534   3
 -11   0   2 0.45955 2.12887   5
  11   0  -2 -2.7887  2.1409   2
 -10   0   2 15.0093  3.5440   5
 -10   0   2 25.4341  4.0973   3
  10   0  -2 21.0159  5.2624   6
  10   0  -2 24.6384  4.3086   4
  10   0  -2 27.8300  4.3264   2
  -9   0   2 0.56780 1.45676   3
  -9   0   2 -0.8694  1.6073   5
   9   0  -2 -0.7182  1.3611   4
  -9   0   2 -0.1758  1.3861   1
   9   0  -2 -0.5540  1.6820   2
   9   0  -2 -2.8879  2.8959   6
  -8   0   2 5.12079 1.77715   3
   8   0  -2 -2.7469  2.5441   6
  -8   0   2 2.60714 1.69765   5
   8   0  -2 0.93391 1.53954   4
   8   0  -2 5.96249 1.98943   2
  -8   0   2 4.38193 1.51990   1
  -7   0   2 0.43112 1.00736   5
   7   0  -2 2.53738 2.26559   6
  -7   0   2 0.12471 0.84658   1
   7   0  -2 -1.2148  0.8873   4
   7   0  -2 0.02206 1.21716   2
  -7   0   2 4.10181 1.67883   3
   6   0  -2 49.9430  4.1831   2
   6   0  -2 49.1712  6.0062   6
  -6   0   2 52.0963  4.3283   3
  -6   0   2 36.8340  4.3933   5
  -6   0   2 47.3943  3.9689   1
  -5   0   2 -1.1581  0.6464   3
   5   0  -2 -0.1677  0.7430   2
  -5   0   2 0.30676 0.94233   5
   5   0  -2 -0.8341  0.6855   4
  -5   0   2 -0.6368  0.5103   1
   5   0  -2 -0.7324  1.1575   6
  -4   0   2 16.5967  1.9419   1
  -4   0   2 15.1546  2.0999   5
   4   0  -2 14.3182  2.2854   6
  -4   0   2 17.2231  2.1573   3
   4   0  -2 17.9881  2.2726   4
   4   0  -2 17.7983  1.9693   2
  -3   0   2 -0.2643  0.5596   3
  -3   0   2 -0.3071  0.4658   1
   3   0  -2 0.92884 0.56489   6
   3   0  -2 1.10704 0.59469   2
  -3   0   2 0.61892 0.70249   5
   3   0  -2 -0.6783  0.7093   4
   2   0  -2 10.3517  1.3738   4
  -2   0   2 12.8289  1.4745   5
  -2   0   2 12.1354  1.4467   1
  -2   0   2 10.4390  1.3589   3
  -1   0   2 -2.5498  0.3975   3
   1   0  -2 -2.5240  0.3616   5
   1   0  -2 -1.9594  0.3958   3
   1   0  -2 -2.3948  0.3877   4
  -1   0   2 -2.8790  0.3951   5
  -1   0   2 -2.0358  0.4629   1
   3   0   2 -1.0339  0.3699   4
  -3   0  -2 -0.4189  0.3627   3
  -3   0  -2 0.22086 0.52498   5
   3   0   2 -0.0848  0.7886   2
  -4   0  -2 1.48494 0.81012   3
   4   0   2 0.77160 0.90668   2
  -4   0  -2 0.51088 0.63687   5
   4   0   2 0.37904 0.59874   4
   5   0   2 -0.3716  0.6044   4
   5   0   2 6.94286 3.11555   6
   5   0   2 -1.1412  0.8556   2
  -5   0  -2 -0.4892  0.7567   5
  -5   0  -2 -0.8553  0.6331   3
   6   0   2 31.3347  3.2948   4
  -6   0  -2 32.1480  3.5072   5
  -6   0  -2 25.7400  3.2758   3
   6   0   2 27.9309  3.7502   2
   6   0   2 31.0977  5.1937   6
  -7   0  -2 0.52283 1.02014   3
  -7   0  -2 0.32495 1.06324   5
   7   0   2 0.16108 1.27717   2
   7   0   2 -0.6672  2.8892   6
   7   0   2 1.73997 1.13760   4
   8   0   2 31.3221  4.2412   2
   8   0   2 27.3636  5.9439   6
   8   0   2 34.7069  4.0438   4
  -8   0  -2 34.4755  4.1618   5
  -8   0  -2 32.4316  4.0278   3
  -9   0  -2 1.63880 1.57007   5
   9   0   2 -0.9545  3.5538   6
   9   0   2 -0.5191  1.8528   2
   9   0   2 -0.6672  0.9955   4
  -9   0  -2 -0.4174  1.5846   3
 -10   0  -2 96.5456  7.8104   5
  10   0   2 100.868   8.545   2
 -10   0  -2 84.7372  7.5586   3
  10   0   2 82.0299 12.0080   6
  10   0   2 91.4504  7.6505   4
  11   0   2 1.21585 1.71590   4
 -11   0  -2 0.69229 1.77279   3
 -11   0  -2 -0.3455  1.8808   5
  11   0   2 -6.1191  3.4421   6
  11   0   2 0.07496 2.18075   2
  12   0   2 -5.4540  3.5136   6
 -12   0  -2 -1.4616  1.5497   5
  12   0   2 0.90393 1.85541   4
 -12   0  -2 -2.1777  2.0034   3
  12   0   2 -3.0883  2.1682   2
 -13   0  -2 1.20411 2.48738   5
 -13   0  -2 0.94509 2.12896   3
  13   0   2 -8.3797  3.5171   6
  13   0   2 -0.1593  3.0520   2
  13   0   2 0.85557 2.22362   4
 -14   0  -2 -1.7600  2.3793   3
 -14   0  -2 2.02307 2.48278   5
  14   0   2 -1.5027  2.4325   2
  15   0   2 -3.8659  2.8990   2
 -15   0  -2 -1.6031  2.5385   3
 -15   0  -2 -0.8858  2.8098   5
 -16   0  -2 7.92516 4.16683   3
  16   0   2 0.35102 3.36632   2
 -16   0  -2 3.10513 3.63222   5
  17  -1  -2 25.6302  5.9232   4
  17   1  -2 11.5646  4.8647   4
  16  -1  -2 8.21417 3.96657   4
 -16  -1   2 -0.9185  3.0434   5
 -16  -1   2 7.20501 4.04846   3
 -16   1   2 5.50986 3.67727   5
 -16   1   2 3.06010 3.06491   3
  16   1  -2 7.24506 3.99521   4
 -15  -1   2 1.40947 2.88583   3
  15  -1  -2 2.59419 2.88062   4
 -15   1   2 2.02911 3.22660   3
  15   1  -2 1.95086 3.22338   4
 -15   1   2 -1.4054  2.3044   5
 -14  -1   2 13.7139  3.9981   3
  14  -1  -2 13.7313  3.5706   4
 -14  -1   2 7.78877 3.62465   5
 -14   1   2 6.56602 3.13198   3
 -14   1   2 11.6322  3.8513   5
  14   1  -2 10.6446  3.9004   4
 -13  -1   2 10.4353  3.2832   3
 -13  -1   2 7.52438 3.34051   5
  13  -1  -2 10.8222  3.6385   4
  13   1  -2 7.71646 3.08622   4
 -13   1   2 5.25651 2.66004   5
 -13   1   2 5.22539 2.89512   3
 -12  -1   2 -0.8607  2.2543   3
  12  -1  -2 1.90144 2.51951   4
  12  -1  -2 -0.7669  2.5437   2
 -12  -1   2 -1.5493  1.8799   5
 -12   1   2 2.42548 2.40585   5
 -12   1   2 0.51069 2.03393   3
  12   1  -2 -1.8237  1.7796   4
  11  -1  -2 100.707   8.914   2
  11  -1  -2 115.050   9.113   4
 -11  -1   2 100.632   8.644   5
 -11  -1   2 94.2098  9.5305   3
  11   1  -2 100.033   8.867   2
 -11   1   2 90.0687  9.4243   3
  11   1  -2 104.377   8.910   4
 -11   1   2 89.2125  8.3926   5
 -10  -1   2 166.258  11.992   5
  10  -1  -2 162.806  12.118   4
  10  -1  -2 134.349  17.266   6
  10  -1  -2 170.821  12.437   2
 -10  -1   2 151.192  11.351   1
 -10  -1   2 149.801  11.714   3
  10   1  -2 154.088  12.180   2
 -10   1   2 157.217  11.745   3
  10   1  -2 163.375  12.205   4
 -10   1   2 149.092  11.933   5
  -9  -1   2 164.804  11.959   1
  -9  -1   2 157.357  12.145   3
   9  -1  -2 177.701  12.583   4
   9  -1  -2 185.596  18.285   6
  -9  -1   2 165.917  12.427   5
  -9   1   2 165.703  12.213   1
   9   1  -2 174.938  12.671   4
  -9   1   2 161.936  12.328   5
   9   1  -2 181.960  12.799   2
  -9   1   2 161.704  12.206   3
   9   1  -2 148.731  17.499   6
   8  -1  -2 23.2701  3.4101   2
  -8  -1   2 27.7444  3.8414   3
   8  -1  -2 21.9380  4.4965   6
  -8  -1   2 29.9507  3.3351   1
   8  -1  -2 28.9298  3.8481   4
  -8  -1   2 28.5332  3.8721   5
  -8   1   2 22.6915  3.4308   5
   8   1  -2 21.9727  3.3723   2
  -8   1   2 19.8493  3.1994   1
   8   1  -2 21.6546  3.4709   4
   8   1  -2 19.5433  4.4168   6
  -8   1   2 25.6658  3.6363   3
  -7  -1   2 55.8389  5.5119   3
  -7  -1   2 53.1493  5.4504   5
  -7  -1   2 60.8300  4.5901   1
   7  -1  -2 57.0637  5.6513   4
   7  -1  -2 56.0531  6.6855   6
   7  -1  -2 53.4398  4.8084   2
   7   1  -2 58.0895  5.0217   4
  -7   1   2 42.3637  4.4132   1
   7   1  -2 60.4030  7.2264   6
  -7   1   2 50.2360  5.2738   5
  -7   1   2 56.0220  5.4621   3
   7   1  -2 51.8451  4.7595   2
  -6  -1   2 132.122   9.293   1
  -6  -1   2 126.665   9.404   3
   6  -1  -2 141.969   9.819   2
   6  -1  -2 123.503   9.593   4
  -6  -1   2 152.076   9.789   5
   6  -1  -2 118.064  13.440   6
   6   1  -2 120.355   9.576   4
   6   1  -2 139.449   9.755   2
   6   1  -2 133.985  13.679   6
  -6   1   2 134.360   9.547   5
  -6   1   2 131.359   9.500   1
  -6   1   2 146.062   9.572   3
  -5  -1   2 20.1363  2.6108   3
   5  -1  -2 23.2935  2.6288   2
   5  -1  -2 25.9603  3.0040   4
  -5  -1   2 24.1642  2.4824   1
   5  -1  -2 20.3324  3.2427   6
  -5  -1   2 21.3675  2.7506   5
  -5   1   2 26.1869  2.9013   3
  -5   1   2 25.8542  2.9561   5
   5   1  -2 20.6853  2.7618   4
   5   1  -2 19.3272  3.4479   6
  -5   1   2 20.7563  2.5366   1
   5   1  -2 24.4509  2.5743   2
  -4  -1   2 13.0569  1.8960   3
  -4  -1   2 12.3591  1.9027   5
   4  -1  -2 14.6081  1.8055   2
  -4  -1   2 15.6859  1.7599   1
   4  -1  -2 11.8921  1.8749   4
   4  -1  -2 10.0711  2.0111   6
  -4   1   2 12.3702  3.5472   6
  -4   1   2 13.8120  1.8460   1
   4   1  -2 10.4499  1.7878   4
   4   1  -2 14.0152  1.6676   2
  -4   1   2 10.3051  1.7418   5
   4   1  -2 17.8469  2.7314   6
  -4   1   2 13.5529  1.8877   3
  -3  -1   2 22.4423  2.4266   3
  -3  -1   2 22.5126  2.2014   1
  -3  -1   2 20.9313  2.3429   5
   3  -1  -2 22.5430  2.0191   2
   3  -1  -2 26.4458  2.5826   4
   3  -1  -2 21.9496  2.8035   6
   3   1  -2 20.3123  1.9365   2
  -3   1   2 20.3791  2.0062   2
  -3   1   2 41.7582  4.4055   6
  -3   1   2 22.8044  2.3126   1
   3   1  -2 22.1072  2.4279   4
  -3   1   2 26.2381  2.4649   3
  -3   1   2 20.4600  2.3150   5
  -2  -1   2 60.7421  4.2348   5
   2  -1  -2 55.5612  4.2025   2
   2  -1  -2 59.6818  4.2653   4
  -2  -1   2 59.5199  4.1957   3
  -2  -1   2 59.6143  4.1491   1
  -2   1   2 58.6728  4.0799   3
  -2   1   2 59.1545  4.2229   2
  -2   1   2 63.4766  4.1758   5
  -2   1   2 55.5179  4.1885   1
   2   1  -2 52.0305  4.1459   4
  -1  -1   2 1079.82   69.63   1
  -1  -1   2 1178.43   67.50   3
  -1  -1   2 1084.80   68.41   5
   1  -1  -2 1117.79   69.31   4
   1   1  -2 1050.76   67.38   3
   1   1  -2 1078.51   69.24   4
  -1   1   2 1005.15   69.62   1
   1   1  -2 1131.19   68.34   5
   0  -1   2 195.861  12.119   1
   0   1  -2 193.587  11.879   5
   0   1  -2 180.729  11.694   3
   0   1   2 170.163  12.023   1
   1  -1   2 116.227   7.750   2
   1  -1   2 113.058  10.925   6
  -1   1  -2 104.889   7.260   3
  -1   1  -2 111.252   7.375   5
   1   1   2 112.480   7.777   2
   3  -1   2 711.881  45.348   4
   3  -1   2 695.951  47.563   2
  -3  -1  -2 660.800  44.227   3
   3  -1   2 749.357  66.965   6
  -3  -1  -2 675.381  44.860   5
   3   1   2 697.980  45.499   4
  -3   1  -2 707.021  44.350   3
   3   1   2 779.763  66.980   6
  -3   1  -2 725.915  44.998   5
   3   1   2 713.776  47.595   2
   4  -1   2 75.7030  5.6532   2
  -4  -1  -2 67.8749  5.1229   3
   4  -1   2 77.0718  5.1316   4
  -4  -1  -2 70.6845  5.2317   5
   4  -1   2 63.6269  7.9288   6
   4   1   2 92.5213  9.3634   6
   4   1   2 66.1001  5.5658   2
   4   1   2 67.9074  5.2104   4
  -4   1  -2 72.4394  5.2203   3
  -4   1  -2 72.6352  5.2936   5
  -5  -1  -2 38.5665  3.3336   5
   5  -1   2 36.4316  3.5561   2
  -5  -1  -2 36.8574  3.3098   3
   5  -1   2 38.6803  3.1742   4
   5  -1   2 52.1902  5.8775   6
   5   1   2 37.1838  5.7454   6
   5   1   2 31.9758  3.1460   4
   5   1   2 39.6335  4.0921   2
  -5   1  -2 39.6246  3.3983   5
  -5   1  -2 37.3907  3.7066   3
   6  -1   2 46.0125  4.3072   4
  -6  -1  -2 61.8108  4.6801   3
   6  -1   2 46.5721  4.7745   2
   6  -1   2 63.0619  7.5495   6
  -6  -1  -2 59.4279  4.7142   5
   6   1   2 52.6891  4.9916   2
  -6   1  -2 55.5429  4.5880   5
   6   1   2 55.4324  4.5545   4
   6   1   2 57.3532  7.8437   6
  -6   1  -2 58.9303  4.6485   3
  -7  -1  -2 150.493  10.958   5
   7  -1   2 152.648  10.858   4
  -7  -1  -2 154.722  10.828   3
   7  -1   2 165.050  16.873   6
   7  -1   2 147.008  11.635   2
  -7   1  -2 154.902  11.021   5
  -7   1  -2 160.947  10.896   3
   7   1   2 146.159  10.893   4
   7   1   2 150.955  11.611   2
   7   1   2 158.133  16.816   6
  -8  -1  -2 4.53697 1.77918   5
   8  -1   2 12.3809  2.3546   4
  -8  -1  -2 9.36509 2.22914   3
   8  -1   2 6.70621 2.32961   2
   8  -1   2 7.55796 4.10419   6
  -8   1  -2 11.0583  2.3006   3
   8   1   2 6.20634 3.90370   6
   8   1   2 6.70189 1.95100   4
   8   1   2 5.80086 2.23982   2
  -8   1  -2 7.41576 2.11951   5
   9  -1   2 89.1203  8.2085   2
  -9  -1  -2 107.634   7.769   3
  -9  -1  -2 97.7458  7.7648   5
   9  -1   2 82.1070 11.6900   6
   9  -1   2 94.4268  7.4591   4
   9   1   2 92.8641 12.1925   6
   9   1   2 83.5490  7.4078   4
  -9   1  -2 100.593   7.753   3
   9   1   2 104.853   8.568   2
  -9   1  -2 91.4219  7.6387   5
 -10  -1  -2 101.860   8.374   5
  10  -1   2 82.8606 12.5601   6
 -10  -1  -2 104.780   8.179   3
  10  -1   2 104.456   9.061   2
  10  -1   2 89.0444  7.8965   4
 -10   1  -2 101.837   8.373   5
 -10   1  -2 109.066   8.269   3
  10   1   2 88.6854  7.9743   4
  10   1   2 100.504  12.957   6
  10   1   2 103.048   8.873   2
  11  -1   2 62.7290  6.6345   4
  11  -1   2 56.7067  9.9112   6
  11  -1   2 66.7127  7.6818   2
 -11  -1  -2 52.7461  6.6522   5
 -11  -1  -2 55.7873  6.6731   3
  11   1   2 74.5299  7.9538   2
 -11   1  -2 54.3487  6.6741   5
 -11   1  -2 72.5112  7.2700   3
  11   1   2 57.3019  9.6662   6
  11   1   2 69.3904  7.0495   4
 -12  -1  -2 -1.1074  2.0617   3
  12  -1   2 -3.4588  4.0546   6
  12  -1   2 -1.8317  1.7997   4
  12  -1   2 -3.6090  2.5881   2
 -12  -1  -2 2.21739 2.12321   5
  12   1   2 0.13939 2.03419   4
 -12   1  -2 -1.6107  2.0440   3
 -12   1  -2 3.76798 2.28127   5
  12   1   2 -0.7600  3.8487   6
  12   1   2 1.78098 2.90470   2
  13  -1   2 4.44594 3.39153   2
  13  -1   2 2.03710 2.15899   4
 -13  -1  -2 0.37735 2.45823   5
 -13  -1  -2 -0.0786  2.2179   3
  13  -1   2 -10.491   3.699   6
 -13   1  -2 0.64647 2.30843   5
  13   1   2 -1.2200  1.5168   4
  13   1   2 -2.5107  3.9026   6
  13   1   2 0.04621 2.83383   2
 -13   1  -2 -0.8968  1.9968   3
 -14  -1  -2 16.6126  4.3307   5
  14  -1   2 14.7004  4.3399   2
 -14  -1  -2 31.2413  5.0713   3
 -14   1  -2 19.0509  4.4417   3
  14   1   2 13.0839  4.3152   2
  14   1   2 7.98904 3.29027   4
 -14   1  -2 8.86087 3.31483   5
 -15  -1  -2 0.65697 2.51015   5
 -15  -1  -2 5.49069 3.14186   3
  15  -1   2 7.87805 4.22356   2
  15   1   2 8.75499 3.93015   2
 -15   1  -2 7.77577 3.76912   5
 -15   1  -2 8.30825 3.28890   3
 -16  -1  -2 5.39628 3.51600   5
  16  -1   2 4.03190 4.02566   2
 -16  -1  -2 0.89618 2.99913   3
 -16   1  -2 1.69066 2.89179   3
 -16   1  -2 4.05624 3.84560   5
  17  -2  -2 1.81442 3.47142   4
  17   2  -2 1.27296 4.08141   4
 -16  -2   2 -2.9920  2.4992   3
  16  -2  -2 2.41274 2.94196   4
 -16  -2   2 0.70003 3.56528   5
 -16   2   2 1.70615 2.87283   3
 -16   2   2 -0.4850  2.8827   5
  16   2  -2 0.01062 3.43719   4
  15  -2  -2 0.86088 2.38888   4
 -15  -2   2 -0.2005  3.0887   5
 -15  -2   2 1.62356 2.77352   3
 -15   2   2 -0.8368  2.4011   5
 -15   2   2 3.20067 3.13379   3
  15   2  -2 -0.8176  2.4143   4
  14  -2  -2 4.70319 3.21568   4
 -14  -2   2 -0.0042  2.7986   5
 -14  -2   2 -1.1337  2.5675   3
  14   2  -2 0.31444 2.19189   4
 -14   2   2 -0.2617  2.1026   3
 -14   2   2 1.26854 2.54567   5
 -13  -2   2 -0.9203  2.3241   5
  13  -2  -2 4.25035 3.16623   4
 -13  -2   2 3.04347 3.03973   3
 -13   2   2 8.77084 3.43403   5
  13   2  -2 4.59841 2.64753   4
 -13   2   2 4.33979 2.52477   3
  12  -2  -2 4.35908 2.60637   4
 -12  -2   2 7.02078 2.86970   5
  12  -2  -2 -1.6402  2.6280   2
 -12  -2   2 -1.5087  2.2328   3
 -12   2   2 1.63866 1.94099   5
 -12   2   2 3.07571 2.51704   3
  12   2  -2 -0.1605  2.0920   4
  11  -2  -2 3.47790 2.62617   2
  11  -2  -2 7.22698 2.65595   4
 -11  -2   2 8.05119 2.96163   5
 -11  -2   2 2.45318 2.04754   3
  11   2  -2 3.32042 2.24248   4
 -11   2   2 3.31497 2.36617   3
  11   2  -2 5.88742 2.43365   2
 -11   2   2 3.04870 2.14167   5
  10  -2  -2 1.17118 1.84778   4
  10  -2  -2 2.41956 2.35219   2
 -10  -2   2 0.85927 1.72425   3
 -10  -2   2 -2.3225  1.3358   5
  10  -2  -2 -5.8863  2.9361   6
  10   2  -2 -1.7980  1.8183   2
 -10   2   2 -1.1245  1.3030   3
 -10   2   2 0.56124 1.82040   5
  10   2  -2 -0.2063  1.8272   4
   9  -2  -2 9.97140 2.64057   2
  -9  -2   2 11.9272  2.2376   1
   9  -2  -2 11.0113  2.9207   6
   9  -2  -2 12.0011  2.9615   4
  -9  -2   2 13.8206  2.8954   3
  -9  -2   2 7.63888 2.50062   5
  -9   2   2 6.28007 2.37652   5
  -9   2   2 10.4191  2.5743   3
  -9   2   2 11.5308  2.6226   1
   9   2  -2 7.07639 2.39048   4
   9   2  -2 5.73641 3.14776   6
   9   2  -2 11.1419  2.7234   2
   8  -2  -2 4.36085 2.09988   6
  -8  -2   2 3.17093 1.26976   1
  -8  -2   2 5.45430 2.16974   3
  -8  -2   2 5.15102 1.93613   5
   8  -2  -2 2.50446 1.81617   2
   8  -2  -2 5.45569 2.00481   4
   8   2  -2 3.26880 1.79562   2
  -8   2   2 3.81140 1.69872   5
   8   2  -2 5.56526 2.83263   6
   8   2  -2 1.10132 1.32437   4
  -8   2   2 4.62831 1.80428   1
  -8   2   2 2.42283 1.74694   3
  -7  -2   2 50.2217  4.1854   1
  -7  -2   2 51.7680  5.3519   5
   7  -2  -2 58.9944  4.9059   4
   7  -2  -2 48.3089  6.4273   6
   7  -2  -2 45.0942  4.5978   2
  -7  -2   2 57.1509  5.4444   3
   7   2  -2 57.3361  5.5877   4
   7   2  -2 54.0104  4.6227   2
   7   2  -2 44.5329  6.5145   6
  -7   2   2 49.7786  5.2935   5
  -7   2   2 52.1048  4.6105   1
  -7   2   2 56.9786  4.6946   3
  -6  -2   2 2.15151 0.92813   1
   6  -2  -2 3.38457 1.41127   4
  -6  -2   2 2.31682 1.35361   5
   6  -2  -2 2.52996 1.41081   6
   6  -2  -2 2.93348 1.33892   2
  -6  -2   2 1.14693 1.04572   3
  -6   2   2 2.96433 1.17985   1
   6   2  -2 2.47294 1.28460   4
  -6   2   2 3.28888 1.30801   3
  -6   2   2 2.76357 1.21577   5
   6   2  -2 3.35367 1.31569   2
  -6   2   2 0.13771 2.57536   6
   6   2  -2 2.44491 2.18122   6
   5  -2  -2 40.1487  3.6317   4
   5  -2  -2 38.0048  4.8863   6
  -5  -2   2 40.6356  3.5696   3
  -5  -2   2 42.9789  3.7166   5
   5  -2  -2 37.8406  3.5297   2
  -5  -2   2 39.3125  3.1582   1
   5   2  -2 32.4573  4.8562   6
  -5   2   2 41.4407  3.5730   1
  -5   2   2 42.1553  3.5145   3
  -5   2   2 41.8580  3.5683   5
  -5   2   2 30.1973  5.6374   6
   5   2  -2 45.1940  3.4411   2
   5   2  -2 40.3827  3.6422   4
  -4  -2   2 9.10557 1.28533   1
  -4  -2   2 8.79265 1.66249   5
   4  -2  -2 7.95933 1.86465   6
   4  -2  -2 7.71071 1.47129   2
   4  -2  -2 7.78074 1.58377   4
  -4  -2   2 6.48795 1.42022   3
  -4   2   2 9.68536 1.63029   5
   4   2  -2 10.2634  2.3187   6
   4   2  -2 10.1113  1.3961   2
  -4   2   2 9.73502 1.55948   3
   4   2  -2 10.5411  1.7090   4
  -4   2   2 8.89375 1.52557   1
  -4   2   2 11.8856  1.6916   2
  -4   2   2 9.95390 3.37113   6
  -3  -2   2 -0.7147  0.4936   1
   3  -2  -2 1.08184 0.87327   4
   3  -2  -2 0.90833 0.79506   6
  -3  -2   2 1.14077 0.72648   3
  -3  -2   2 0.39311 0.62621   5
   3  -2  -2 0.18340 0.61941   2
   3   2  -2 0.15063 0.46333   2
  -3   2   2 -0.0502  0.4448   5
   3   2  -2 0.69278 0.64919   4
  -3   2   2 0.74270 0.56481   2
  -3   2   2 -0.6518  0.4483   1
  -3   2   2 -0.9360  0.5049   3
  -3   2   2 0.67432 3.12793   6
   2  -2  -2 21.7933  2.2280   2
   2  -2  -2 25.6802  2.1218   4
  -2  -2   2 23.1765  2.3363   5
  -2  -2   2 21.7495  1.8684   1
  -2  -2   2 23.6130  2.3109   3
   2   2  -2 22.2359  2.1469   3
  -2   2   2 18.0616  1.8675   2
  -2   2   2 19.0304  1.7867   3
   2   2  -2 21.3015  1.9385   4
  -2   2   2 20.5121  1.9342   1
   2   2  -2 21.2990  1.8903   5
  -2   2   2 22.0831  1.8286   5
  -1  -2   2 90.5304  6.3747   1
   1  -2  -2 83.3661  6.4037   4
  -1  -2   2 98.0986  6.4925   5
  -1  -2   2 99.3447  6.4075   3
  -1   2   2 91.3334  6.4223   1
  -1   2   2 91.1893  6.6462   2
   1   2  -2 104.487   6.321   3
   1   2  -2 98.7747  6.3841   5
   1   2  -2 93.2085  6.3571   4
   2  -2   2 39.9869  4.8124   6
  -2  -2  -2 41.8987  2.9874   3
  -2  -2  -2 43.5532  3.0597   5
   2  -2   2 43.1212  3.4354   2
  -2   2  -2 47.2866  3.2558   3
   2   2   2 39.7166  3.2068   4
  -2   2  -2 48.0510  3.2973   5
   2   2   2 38.5356  3.4129   2
   3  -2   2 2.78802 1.30068   6
  -3  -2  -2 2.21751 0.70440   5
   3  -2   2 2.83256 0.74015   4
  -3  -2  -2 2.31267 0.71325   3
   3  -2   2 3.32584 0.98978   2
  -3   2  -2 2.17834 0.77066   5
   3   2   2 6.18908 2.76030   6
   3   2   2 2.38527 0.83056   4
  -3   2  -2 3.05708 0.83166   3
   3   2   2 2.30532 0.92777   2
   4  -2   2 0.02983 0.89928   6
  -4  -2  -2 0.05820 0.49642   3
  -4  -2  -2 -0.0973  0.6257   5
   4  -2   2 0.40919 0.62186   4
   4  -2   2 1.24562 0.89711   2
   4   2   2 1.33178 0.76274   4
   4   2   2 1.11760 3.30116   6
  -4   2  -2 0.69286 0.71339   5
  -4   2  -2 0.82255 0.66765   3
   4   2   2 -0.5045  0.7413   2
  -5  -2  -2 20.6716  2.6585   3
   5  -2   2 22.6010  3.9872   6
   5  -2   2 29.6732  2.8382   4
   5  -2   2 25.8337  3.2065   2
  -5  -2  -2 26.9958  2.9906   5
  -5   2  -2 24.8056  2.9341   5
   5   2   2 29.9156  3.1233   4
   5   2   2 28.8451  5.0265   6
  -5   2  -2 25.2302  2.9182   3
   5   2   2 23.0541  3.0712   2
  -6  -2  -2 2.07584 1.13117   5
   6  -2   2 1.53584 1.22472   2
   6  -2   2 0.20531 1.65446   6
   6  -2   2 1.08444 0.94649   4
  -6  -2  -2 0.87687 1.12571   3
   6   2   2 2.26959 1.35756   2
   6   2   2 0.00080 0.83131   4
   6   2   2 2.62937 3.14647   6
  -6   2  -2 1.44166 1.01372   5
  -6   2  -2 1.48096 0.96699   3
   7  -2   2 62.3659  8.7336   6
   7  -2   2 71.2180  6.5032   2
   7  -2   2 69.9443  5.8159   4
  -7  -2  -2 79.4226  6.0983   5
  -7  -2  -2 81.3608  6.0925   3
   7   2   2 76.9855  6.5005   2
  -7   2  -2 79.7212  6.0663   3
  -7   2  -2 78.0526  6.1034   5
   7   2   2 75.3761  9.5402   6
   7   2   2 78.6613  6.1344   4
   8  -2   2 16.9935  4.4887   6
   8  -2   2 10.4785  2.2204   4
  -8  -2  -2 11.1766  2.3608   5
  -8  -2  -2 15.4479  2.6110   3
   8  -2   2 12.5853  2.7186   2
  -8   2  -2 13.6320  2.5358   5
  -8   2  -2 15.1160  2.8544   3
   8   2   2 12.6913  2.4780   4
   8   2   2 11.6573  2.9095   2
   8   2   2 9.88685 4.08753   6
   9  -2   2 3.12260 2.15537   2
  -9  -2  -2 2.37559 1.77743   5
   9  -2   2 -2.5326  2.8140   6
   9  -2   2 1.04762 1.53911   4
  -9  -2  -2 1.54669 1.64873   3
  -9   2  -2 2.49870 1.77057   3
   9   2   2 -0.0173  2.7939   6
   9   2   2 0.52225 1.97871   2
  -9   2  -2 1.11473 1.40905   5
   9   2   2 -0.8503  1.0622   4
 -10  -2  -2 3.46330 2.11585   5
  10  -2   2 -0.5288  1.3724   4
  10  -2   2 -2.9909  3.1865   6
 -10  -2  -2 -1.9344  1.1740   3
  10  -2   2 2.31059 2.19889   2
  10   2   2 -3.5050  1.0920   4
 -10   2  -2 -0.6726  1.5236   3
  10   2   2 -0.8581  1.8253   2
 -10   2  -2 -0.9723  1.6799   5
  10   2   2 -1.8909  2.6927   6
  11  -2   2 -2.8676  4.2417   6
  11  -2   2 1.63760 1.67915   4
 -11  -2  -2 4.99897 2.43928   5
  11  -2   2 -0.3015  2.3498   2
 -11  -2  -2 5.70731 2.49049   3
  11   2   2 0.90108 2.05346   2
  11   2   2 10.4969  2.8109   4
 -11   2  -2 6.18446 2.31076   5
 -11   2  -2 2.29206 2.05118   3
  11   2   2 -1.3430  3.5843   6
  12  -2   2 -0.0842  4.8101   6
  12  -2   2 1.84374 2.47521   2
 -12  -2  -2 3.83578 2.49977   3
  12  -2   2 2.39764 2.20397   4
 -12  -2  -2 2.50137 2.23691   5
  12   2   2 1.46486 3.90376   6
  12   2   2 8.40875 2.97788   4
 -12   2  -2 2.12447 2.49541   5
  12   2   2 11.2401  3.5880   2
 -12   2  -2 2.66834 2.29216   3
  13  -2   2 6.98558 3.41013   2
  13  -2   2 -4.5649  4.4670   6
 -13  -2  -2 2.26214 2.84622   3
 -13  -2  -2 2.75841 2.82106   5
  13   2   2 7.49746 2.79706   4
  13   2   2 6.45096 3.25205   2
 -13   2  -2 2.61978 2.80337   5
 -13   2  -2 5.62123 2.74375   3
 -14  -2  -2 0.94408 2.72703   5
 -14  -2  -2 -0.1292  2.7161   3
  14  -2   2 2.79175 3.54329   2
  14  -2   2 -2.4063  4.7859   6
  14   2   2 6.48602 3.21696   2
  14   2   2 0.59061 2.58464   4
 -14   2  -2 2.08725 2.50813   5
 -14   2  -2 0.58469 2.52943   3
  15  -2   2 -1.9720  3.6146   2
 -15  -2  -2 7.27178 3.72147   3
 -15  -2  -2 4.78591 3.48901   5
  15   2   2 8.52868 3.82057   2
 -15   2  -2 4.83615 3.44920   5
 -15   2  -2 3.30881 2.86870   3
  16  -2   2 1.44984 3.83783   2
 -16  -2  -2 0.62228 3.47141   3
 -16  -2  -2 1.29046 3.56607   5
 -16   2  -2 -1.2705  2.2697   5
 -16   2  -2 -0.6131  3.2674   3
 -16  -3   2 0.74825 3.14334   5
  16  -3  -2 2.54876 2.98559   4
 -16  -3   2 -0.6688  3.5430   3
  16   3  -2 -1.6983  3.1759   4
 -16   3   2 1.53954 2.97284   5
 -16   3   2 0.49802 2.60174   3
 -15  -3   2 5.83704 3.63532   3
 -15  -3   2 4.39084 3.16628   5
  15  -3  -2 5.75216 3.69291   4
  15   3  -2 4.30925 3.61442   4
 -15   3   2 -0.1810  2.4073   5
 -15   3   2 1.97946 2.91606   3
 -14  -3   2 10.5159  3.7268   5
  14  -3  -2 14.1366  4.4695   4
 -14  -3   2 6.07670 3.47063   3
  14   3  -2 9.18219 3.65673   4
 -14   3   2 3.63773 3.18413   3
 -14   3   2 7.09633 3.02270   5
  13  -3  -2 -1.8862  2.6102   2
 -13  -3   2 0.66211 2.28561   5
  13  -3  -2 9.10660 3.46719   4
 -13  -3   2 6.82446 3.38575   3
 -13   3   2 3.13780 2.50182   5
 -13   3   2 2.09346 2.68351   3
  12  -3  -2 47.2873  6.4540   4
 -12  -3   2 39.8205  5.8785   5
 -12  -3   2 39.3129  5.9929   3
 -12   3   2 43.0395  5.8814   5
  12   3  -2 45.5961  6.3319   4
 -12   3   2 50.5774  6.4984   3
  11  -3  -2 5.42734 2.73859   2
 -11  -3   2 3.35677 2.42911   5
  11  -3  -2 9.47165 3.15332   4
 -11  -3   2 5.22005 2.33550   3
  11   3  -2 3.47715 2.28351   4
  11   3  -2 9.14928 2.80342   2
 -11   3   2 7.25456 2.53858   5
 -11   3   2 7.71909 2.81887   3
  10  -3  -2 16.9458  3.5242   2
 -10  -3   2 10.9509  3.2652   3
  10  -3  -2 17.1408  3.9983   6
  10  -3  -2 26.9867  4.4050   4
 -10  -3   2 17.5667  3.5150   5
 -10   3   2 14.9631  3.1395   5
  10   3  -2 20.3615  3.8986   4
  10   3  -2 23.1858  3.7227   2
 -10   3   2 20.9181  3.7893   3
   9  -3  -2 48.5155  5.7237   2
   9  -3  -2 62.1224  6.3863   4
  -9  -3   2 62.6912  6.2907   5
   9  -3  -2 37.8266  6.8359   6
  -9  -3   2 50.1562  5.6885   3
   9   3  -2 61.6415  6.0493   2
  -9   3   2 50.4001  5.7906   3
   9   3  -2 51.7596  6.0111   4
  -9   3   2 49.1292  5.7025   5
  -8  -3   2 16.8878  2.3443   1
  -8  -3   2 19.2616  3.2935   3
  -8  -3   2 11.0478  2.6307   5
   8  -3  -2 13.8015  2.8516   2
   8  -3  -2 14.1143  3.4746   6
   8  -3  -2 18.2909  3.2828   4
  -8   3   2 20.0605  3.1793   1
   8   3  -2 13.8110  3.5443   6
   8   3  -2 16.4251  2.8377   2
   8   3  -2 13.7716  2.8195   4
  -8   3   2 17.2830  3.0704   3
  -8   3   2 14.6588  2.7989   5
  -7  -3   2 26.6361  3.5445   3
   7  -3  -2 20.0707  4.2762   6
  -7  -3   2 24.4998  3.6326   5
   7  -3  -2 28.7518  3.6766   2
   7  -3  -2 24.4158  3.6770   4
  -7  -3   2 30.8944  3.0340   1
  -7   3   2 30.6615  3.6864   3
   7   3  -2 28.8061  3.4663   2
  -7   3   2 35.8880  4.0566   5
   7   3  -2 28.3306  3.8704   4
  -7   3   2 34.9290  3.9252   1
  -7   3   2 25.7355  5.2567   6
   7   3  -2 23.8541  4.2910   6
  -6  -3   2 13.8614  2.3725   3
   6  -3  -2 10.9330  2.5437   6
  -6  -3   2 8.69775 1.98628   5
   6  -3  -2 11.5930  2.1892   2
   6  -3  -2 11.6472  2.3310   4
  -6  -3   2 9.94152 1.56777   1
  -6   3   2 11.8694  3.6444   6
   6   3  -2 8.87127 2.75486   6
   6   3  -2 11.9999  1.9607   2
  -6   3   2 14.0411  2.2017   3
   6   3  -2 11.6971  2.3149   4
  -6   3   2 10.1475  2.0679   5
  -6   3   2 13.1602  2.2467   1
  -5  -3   2 43.4738  3.2343   1
  -5  -3   2 45.4450  4.2799   3
  -5  -3   2 41.3367  4.2127   5
   5  -3  -2 47.1188  4.0232   4
   5  -3  -2 37.1342  3.6711   2
   5  -3  -2 41.6807  5.2982   6
   5   3  -2 36.8791  5.1106   6
  -5   3   2 35.9651  6.0185   6
   5   3  -2 43.4620  4.3210   4
  -5   3   2 40.4226  3.5988   3
  -5   3   2 37.9977  3.6081   1
  -5   3   2 42.8549  3.8731   2
  -5   3   2 41.6166  3.5877   5
   5   3  -2 37.2989  3.4348   2
   4  -3  -2 39.3165  4.9776   6
  -4  -3   2 47.0016  3.5824   3
   4  -3  -2 45.5974  3.6891   2
  -4  -3   2 38.3581  3.4765   5
   4  -3  -2 39.1644  3.5206   4
  -4  -3   2 41.0047  3.1046   1
   4   3  -2 36.2253  4.9619   6
   4   3  -2 36.6062  3.2381   2
   4   3  -2 46.7748  3.6552   4
  -4   3   2 39.0109  3.2729   3
  -4   3   2 43.4698  3.5701   1
  -4   3   2 42.1843  3.3933   5
  -4   3   2 33.7456  3.4578   2
  -4   3   2 42.3487  6.1111   6
  -3  -3   2 3.84911 1.05821   5
  -3  -3   2 2.87341 0.81172   1
   3  -3  -2 1.80051 0.93179   4
  -3  -3   2 3.62938 1.01665   3
   3  -3  -2 2.61123 0.99083   2
   3  -3  -2 2.38269 1.23970   6
   3   3  -2 1.66979 0.65074   2
  -3   3   2 1.87665 0.71509   5
  -3   3   2 2.20519 0.79865   1
   3   3  -2 1.99428 0.84835   4
  -3   3   2 -3.0784  3.5010   6
  -3   3   2 1.56218 0.84142   2
   3   3  -2 1.79962 2.24703   6
  -3   3   2 1.60223 0.71692   3
  -2  -3   2 271.903  18.234   3
   2  -3  -2 289.157  19.562   2
   2  -3  -2 272.232  18.738   4
  -2  -3   2 279.986  18.569   1
  -2  -3   2 286.566  18.525   5
  -2   3   2 278.159  17.956   3
   2   3  -2 316.712  27.278   6
   2   3  -2 289.719  18.729   4
  -2   3   2 285.879  18.203   5
   2   3  -2 287.954  18.163   3
   2   3  -2 284.182  19.207   2
  -2   3   2 278.507  19.497   2
   2   3  -2 286.493  18.429   5
  -2   3   2 283.359  18.807   1
  -1  -3   2 1462.98   90.70   5
   1  -3  -2 1414.34   91.96   4
  -1  -3   2 1443.05   89.44   3
   1   3  -2 1399.20   91.86   4
  -1   3   2 1425.56   92.32   1
   1   3  -2 1351.33   90.54   5
   1   3  -2 1442.70   95.66   2
   1   3  -2 1428.39   89.32   3
  -1   3   2 1373.75   95.85   2
  -1   3   2 1507.33  134.86   6
   1   3  -2 1640.52  134.55   6
   0  -3  -2 528.729  33.770   4
   0  -3   2 527.110  49.337   6
   0  -3   2 534.585  35.071   2
   0   3  -2 539.639  33.585   4
   0   3  -2 499.918  33.165   5
   0   3  -2 534.396  35.049   2
   0   3  -2 535.296  32.742   3
   0   3   2 502.569  35.129   2
   0   3   2 514.969  33.714   1
   1  -3   2 1825.20  166.95   6
   1  -3   2 1795.26  113.61   4
   1  -3   2 1761.39  118.65   2
  -1   3  -2 1708.64  110.58   3
   1   3   2 1888.98  167.02   6
  -1   3  -2 1820.12  118.69   2
   1   3   2 1652.05  118.70   2
  -1   3  -2 1706.00  112.12   5
  -1   3  -2 2025.62  167.00   6
   1   3   2 1736.63  114.08   1
   2  -3   2 1673.61  106.90   2
  -2  -3  -2 1554.59  100.69   5
   2  -3   2 1670.93  102.22   4
  -2  -3  -2 1513.35   99.26   3
   2  -3   2 1702.58  150.40   6
  -2   3  -2 1651.56  150.42   6
  -2   3  -2 1425.60  106.85   2
  -2   3  -2 1629.11   99.63   3
   2   3   2 1740.24  150.41   6
   2   3   2 1589.83  102.52   4
  -2   3  -2 1625.39  101.01   5
   2   3   2 1560.13  106.89   2
   3  -3   2 23.7387  3.7618   6
   3  -3   2 30.4448  3.0776   2
  -3  -3  -2 24.9090  2.2072   5
   3  -3   2 29.3360  2.2827   4
  -3  -3  -2 23.5453  2.1575   3
  -3   3  -2 26.1552  2.9617   2
  -3   3  -2 31.3545  2.9217   5
  -3   3  -2 28.9737  2.8400   3
   3   3   2 24.9493  2.7676   4
   3   3   2 25.8654  4.8760   6
   3   3   2 27.8884  2.9712   2
  -3   3  -2 28.2879  5.2698   6
  -4  -3  -2 1.82625 0.88295   3
   4  -3   2 3.79665 1.56423   6
  -4  -3  -2 7.19140 1.28596   5
   4  -3   2 4.96471 1.37895   2
   4  -3   2 3.13038 0.96791   4
   4   3   2 3.73800 2.73608   6
   4   3   2 4.78659 1.36950   2
   4   3   2 4.60574 1.21801   4
  -4   3  -2 4.32537 4.29375   6
  -4   3  -2 3.82577 1.10983   3
  -4   3  -2 3.33297 1.06135   5
  -5  -3  -2 82.3149  6.3080   5
   5  -3   2 91.5794  9.7708   6
  -5  -3  -2 95.4768  6.3530   3
   5  -3   2 81.0815  6.7838   2
   5  -3   2 90.9376  6.3063   4
   5   3   2 81.8264 10.0380   6
  -5   3  -2 86.7118  6.3625   3
   5   3   2 76.3291  6.7813   2
  -5   3  -2 94.5155  6.5685   5
   5   3   2 78.8904  6.4617   4
   6  -3   2 22.2666  2.6825   4
   6  -3   2 10.3349  3.0952   6
  -6  -3  -2 18.7903  2.6752   5
  -6  -3  -2 20.3020  2.6259   3
   6  -3   2 20.6127  2.9904   2
   6   3   2 22.5062  3.1870   2
  -6   3  -2 20.5341  2.7396   3
  -6   3  -2 16.3374  2.5683   5
   6   3   2 18.3947  4.4408   6
   6   3   2 22.7874  2.9731   4
  -7  -3  -2 99.8348  7.1257   3
   7  -3   2 88.4046  7.5815   2
   7  -3   2 102.607  10.945   6
   7  -3   2 81.2912  6.8828   4
  -7  -3  -2 91.2155  7.1034   5
   7   3   2 86.8143  7.1632   4
   7   3   2 95.2303  7.6263   2
  -7   3  -2 90.9855  7.0777   3
   7   3   2 96.2149 11.4377   6
  -7   3  -2 91.2922  7.1796   5
   8  -3   2 -1.3723  1.1829   4
   8  -3   2 2.34370 1.74618   2
  -8  -3  -2 2.55693 1.64682   5
  -8  -3  -2 0.21800 1.37135   3
   8  -3   2 1.95579 2.11233   6
   8   3   2 0.85698 1.17828   4
   8   3   2 -0.5964  1.6526   2
  -8   3  -2 -0.2593  1.3615   5
  -8   3  -2 0.06776 1.10258   3
   8   3   2 3.76103 3.29942   6
   9  -3   2 19.1437  3.7711   2
   9  -3   2 18.6372  3.1652   4
  -9  -3  -2 20.1801  3.2098   3
  -9  -3  -2 22.9892  3.5744   5
   9  -3   2 20.4570  4.6482   6
   9   3   2 19.2565  3.7299   2
   9   3   2 18.5963  3.3091   4
   9   3   2 11.9794  4.7195   6
  -9   3  -2 13.4179  2.8676   5
  -9   3  -2 12.3375  2.7458   3
  10  -3   2 -5.8080  3.0628   6
  10  -3   2 5.16340 2.20015   4
  10  -3   2 5.81060 2.66810   2
 -10  -3  -2 7.88852 2.33549   3
 -10  -3  -2 4.62729 2.27908   5
 -10   3  -2 7.62402 2.71163   5
  10   3   2 6.55662 2.52136   2
 -10   3  -2 8.86047 2.46423   3
  10   3   2 13.9020  3.1696   4
  10   3   2 5.41467 4.19855   6
  11  -3   2 34.7058  4.7634   4
 -11  -3  -2 33.8685  4.8400   3
 -11  -3  -2 29.8346  4.8091   5
  11  -3   2 27.3057  7.3978   6
  11  -3   2 41.5029  6.0164   2
 -11   3  -2 30.3190  4.8233   3
 -11   3  -2 34.0870  4.9437   5
  11   3   2 35.0142  7.2420   6
  11   3   2 33.4039  5.4191   2
  11   3   2 35.1625  4.9347   4
 -12  -3  -2 62.5498  7.2264   3
  12  -3   2 49.6381 10.4334   6
 -12  -3  -2 65.0583  7.4291   5
  12  -3   2 69.3938  7.2604   4
  12  -3   2 63.6783  8.0325   2
  12   3   2 68.5462  7.5364   4
  12   3   2 69.9324  8.1585   2
 -12   3  -2 54.1413  6.8241   3
 -12   3  -2 60.5425  7.2048   5
  12   3   2 55.5260  9.8007   6
 -13  -3  -2 0.12819 2.23321   5
  13  -3   2 0.59439 2.66710   2
 -13  -3  -2 2.33959 2.31487   3
  13  -3   2 -14.497   3.798   6
  13   3   2 -2.4432  1.6930   2
 -13   3  -2 0.78559 2.37160   3
  13   3   2 0.32788 2.28616   4
 -13   3  -2 -1.4238  1.6200   5
  14  -3   2 -12.593   4.049   6
 -14  -3  -2 -1.2025  2.6430   5
 -14  -3  -2 -2.0299  2.1488   3
  14  -3   2 -2.1646  2.4941   2
 -14   3  -2 -0.9173  1.9488   5
  14   3   2 2.95699 3.02835   4
 -14   3  -2 -3.1189  2.0983   3
  14   3   2 -1.9036  2.8514   2
 -15  -3  -2 13.7060  3.9896   3
 -15  -3  -2 20.6173  5.1370   5
  15  -3   2 12.4012  4.7031   2
 -15   3  -2 13.6519  3.8472   3
  15   3   2 23.9157  5.1793   2
 -15   3  -2 3.55655 3.22897   5
 -16  -3  -2 1.50327 3.35256   3
  16  -3   2 4.75097 4.40566   2
 -16  -3  -2 1.16669 3.55821   5
 -16   3  -2 0.61714 3.06075   5
 -16   3  -2 1.44348 3.21957   3
 -16  -4   2 -1.6950  3.3328   5
  16  -4  -2 0.55672 3.52930   4
 -16  -4   2 -0.5072  3.6329   3
  16   4  -2 3.32710 3.50146   4
 -16   4   2 -0.2978  2.6165   3
 -16   4   2 0.52797 3.20520   5
 -15  -4   2 4.67869 3.43059   5
 -15  -4   2 0.06249 3.25353   3
  15  -4  -2 -1.2978  3.2160   4
  15   4  -2 2.39931 2.92723   4
 -15   4   2 0.17547 2.66928   5
 -15   4   2 4.75230 3.18401   3
  14  -4  -2 -0.0918  2.7483   4
 -14  -4   2 2.95304 3.35979   5
 -14  -4   2 0.43977 2.90312   3
 -14   4   2 -1.8600  2.4006   5
  14   4  -2 0.13074 2.98100   4
 -14   4   2 0.61161 2.20415   3
 -13  -4   2 0.79791 2.91616   5
 -13  -4   2 -0.8332  2.1546   3
  13  -4  -2 4.41577 3.13984   4
  13  -4  -2 -4.9466  2.4407   2
 -13   4   2 1.54025 2.15257   3
 -13   4   2 -0.1492  2.2411   5
  13   4  -2 0.10665 2.30231   4
  12  -4  -2 12.8357  3.9087   4
 -12  -4   2 15.4232  4.0662   5
 -12  -4   2 12.9701  3.5099   3
  12  -4  -2 16.6437  3.8786   2
  12   4  -2 15.7912  4.0084   4
 -12   4   2 15.4050  3.5750   5
 -12   4   2 8.69724 2.99384   3
 -11  -4   2 -0.0941  1.8508   5
  11  -4  -2 1.22440 2.04769   6
  11  -4  -2 -1.0464  2.0569   2
  11  -4  -2 -0.6196  2.3171   4
 -11  -4   2 -1.7778  2.0153   3
  11   4  -2 0.56774 2.03261   4
 -11   4   2 -1.7261  1.8995   3
 -11   4   2 1.66513 1.96069   5
 -10  -4   2 8.24912 2.51863   5
  10  -4  -2 8.38864 2.59473   4
 -10  -4   2 3.83516 2.42674   3
  10  -4  -2 3.62378 2.46148   6
  10  -4  -2 7.13702 2.73519   2
  10   4  -2 0.77671 1.81762   2
  10   4  -2 0.96989 1.97451   4
 -10   4   2 6.78137 2.26588   3
 -10   4   2 4.43987 2.33595   5
  -9  -4   2 0.12983 1.65361   5
   9  -4  -2 4.36234 2.09736   4
   9  -4  -2 1.75847 2.25576   6
  -9  -4   2 3.75995 2.15778   3
   9  -4  -2 4.34462 2.02129   2
  -9   4   2 2.62027 1.67612   5
  -9   4   2 4.32028 2.13791   3
   9   4  -2 6.61822 2.06330   2
   9   4  -2 5.79141 2.31538   4
  -8  -4   2 -1.0733  1.0657   3
   8  -4  -2 -1.3403  1.3485   4
  -8  -4   2 -0.7482  1.3947   5
   8  -4  -2 -0.1992  1.5356   2
   8  -4  -2 -1.2280  1.4000   6
   8   4  -2 -1.1726  1.2845   2
   8   4  -2 0.65941 2.15126   6
  -8   4   2 -0.3950  1.2495   3
  -8   4   2 -1.4822  2.5919   6
  -8   4   2 1.62534 1.39074   1
  -8   4   2 -1.1741  1.3362   5
   8   4  -2 -0.3237  1.2893   4
  -7  -4   2 2.20356 1.63502   5
   7  -4  -2 2.57598 1.66720   6
   7  -4  -2 5.52556 1.70355   2
   7  -4  -2 1.22577 1.37430   4
  -7  -4   2 4.79268 1.65793   3
  -7  -4   2 3.06459 1.03113   1
   7   4  -2 0.84197 1.16945   2
   7   4  -2 3.48499 1.58445   4
  -7   4   2 6.55899 3.42450   6
   7   4  -2 4.03577 2.23073   6
  -7   4   2 4.31406 1.65489   5
  -7   4   2 0.62217 1.14180   3
  -7   4   2 5.43812 1.72685   1
  -6  -4   2 0.63347 1.03041   3
   6  -4  -2 0.50821 1.45532   6
  -6  -4   2 0.57852 0.67678   1
   6  -4  -2 0.03178 1.14606   2
  -6  -4   2 1.05922 1.23731   5
   6  -4  -2 -0.1114  1.1388   4
  -6   4   2 1.14752 2.86813   6
  -6   4   2 0.86592 0.99740   2
  -6   4   2 0.64539 1.12040   5
  -6   4   2 0.86801 1.07528   1
  -6   4   2 -1.5449  0.7819   3
   6   4  -2 0.28573 0.92425   2
   6   4  -2 -0.0857  0.9839   4
   6   4  -2 0.40203 1.87750   6
  -5  -4   2 -0.0445  0.6814   1
   5  -4  -2 1.73884 1.23566   2
   5  -4  -2 0.03592 1.07072   4
  -5  -4   2 1.35118 1.13659   3
  -5  -4   2 0.66154 1.09316   5
   5  -4  -2 2.76409 1.63671   6
  -5   4   2 2.61724 1.19496   2
   5   4  -2 -0.4520  0.8059   4
  -5   4   2 1.41459 1.21985   1
   5   4  -2 1.48763 0.91036   2
   5   4  -2 4.41070 2.09983   6
  -5   4   2 2.37999 2.97341   6
  -5   4   2 1.62958 0.97252   5
  -5   4   2 2.50670 1.19004   3
  -4  -4   2 40.6214  3.2258   1
  -4  -4   2 43.1666  3.6565   3
   4  -4  -2 41.2188  3.7048   4
   4  -4  -2 46.7951  5.5510   6
  -4  -4   2 40.8255  3.6529   5
   4  -4  -2 42.0570  3.8032   2
   4   4  -2 37.9506  5.3012   6
  -4   4   2 45.8913  3.5214   3
  -4   4   2 43.3874  3.7393   1
  -4   4   2 42.8959  6.5180   6
   4   4  -2 39.4117  3.4611   2
   4   4  -2 41.8600  3.7400   4
  -4   4   2 42.3027  3.8798   2
  -4   4   2 41.5926  3.4739   5
  -3  -4   2 -0.5853  0.6245   5
   3  -4  -2 0.39081 0.74038   2
   3  -4  -2 0.71135 0.83499   4
   3  -4  -2 0.93071 1.05604   6
  -3  -4   2 0.54304 0.64741   1
  -3  -4   2 -0.2831  0.7918   3
   3   4  -2 -0.2779  0.7253   4
   3   4  -2 0.90376 0.71731   3
  -3   4   2 4.30722 3.84038   6
   3   4  -2 0.61973 0.57699   2
  -3   4   2 1.51218 0.91297   1
   3   4  -2 -0.4523  0.3977   5
   3   4  -2 2.59153 2.43164   6
  -3   4   2 0.66383 0.73218   2
  -3   4   2 0.78498 0.57648   5
  -3   4   2 1.05971 0.68567   3
  -2  -4   2 12.4213  1.5609   1
  -2  -4   2 13.0195  1.7635   3
  -2  -4   2 11.2367  1.7722   5
   2  -4  -2 11.3514  1.7451   4
  -2   4   2 12.5647  5.2240   6
  -2   4   2 15.0552  1.4877   3
  -2   4   2 11.6224  1.7254   1
   2   4  -2 12.8398  1.5838   2
   2   4  -2 11.9679  3.4549   6
  -2   4   2 13.8600  1.4178   5
   2   4  -2 9.50228 1.64697   4
   2   4  -2 11.6442  1.5700   3
   2   4  -2 9.68347 1.54865   5
  -2   4   2 10.5322  1.7053   2
  -1  -4   2 -1.0469  0.5718   5
   1  -4  -2 -0.3050  0.5470   4
  -1  -4   2 -1.1514  0.5641   3
   1   4  -2 -0.3664  3.3471   6
   1   4  -2 -0.5641  0.4053   4
   1   4  -2 0.04737 0.48108   5
   1   4  -2 -0.4897  0.3983   3
  -1   4   2 -0.6836  0.4138   1
   1   4  -2 -0.1358  0.4621   2
  -1   4   2 -0.3794  0.5132   2
   0  -4  -2 18.5712  2.1265   4
   0  -4   2 13.3858  2.4054   6
   0  -4   2 13.3753  1.7213   2
   0   4   2 11.7099  1.7759   2
   0   4  -2 14.0057  1.6794   4
   0   4  -2 15.7130  1.7631   5
   0   4  -2 14.9462  1.8189   2
   0   4  -2 12.0049  1.5987   3
   0   4   2 14.2367  1.6247   1
   1  -4   2 10.1373  1.6130   2
  -1  -4  -2 9.21220 1.65506   4
   1  -4   2 13.4382  1.5481   4
   1  -4   2 10.1641  2.1531   6
   1   4   2 10.8964  1.2820   1
  -1   4  -2 10.3532  1.3913   3
   1   4   2 11.8547  1.6991   2
  -1   4  -2 9.77225 1.54239   2
  -1   4  -2 14.2357  1.6543   5
  -2  -4  -2 11.6290  1.2501   3
   2  -4   2 11.2906  1.7943   2
   2  -4   2 11.3981  1.4933   4
  -2  -4  -2 13.2145  1.3338   5
   2  -4   2 12.2183  2.3663   6
  -2   4  -2 13.5426  1.7622   5
  -2   4  -2 14.2472  1.7514   3
  -2   4  -2 13.8807  1.9073   2
  -2   4  -2 12.8674  5.0376   6
   2   4   2 8.04773 1.58081   4
   2   4   2 14.8734  2.0051   2
   2   4   2 16.2228  4.7258   6
  -3  -4  -2 16.9766  1.8216   3
   3  -4   2 16.1871  2.2621   2
  -3  -4  -2 16.0605  1.8281   5
   3  -4   2 18.9363  2.0724   4
   3  -4   2 19.5847  3.2433   6
   3   4   2 15.4278  4.0604   6
  -3   4  -2 15.6455  4.9589   6
   3   4   2 18.4029  2.3651   4
  -3   4  -2 17.0177  2.1504   3
   3   4   2 14.7962  2.1702   2
  -3   4  -2 22.2265  2.6992   2
  -3   4  -2 24.9474  2.5109   5
   4  -4   2 4.06051 1.26296   2
  -4  -4  -2 2.18663 0.92146   5
  -4  -4  -2 4.71747 1.07515   3
   4  -4   2 1.46211 1.23319   6
   4  -4   2 1.48552 0.89196   4
   4   4   2 2.92220 1.12091   4
   4   4   2 2.87270 1.19103   2
   4   4   2 0.20383 2.50527   6
  -4   4  -2 2.62483 1.01431   5
  -4   4  -2 2.28799 0.94975   3
  -4   4  -2 1.45830 1.06841   2
  -4   4  -2 3.38637 3.19557   6
  -5  -4  -2 1.19854 0.90621   3
   5  -4   2 0.86064 1.07515   2
   5  -4   2 1.80601 1.12548   4
  -5  -4  -2 1.63580 1.05071   5
   5  -4   2 1.43856 1.36204   6
   5   4   2 0.71587 1.19642   2
  -5   4  -2 2.78467 1.13568   3
   5   4   2 0.54622 0.95148   4
  -5   4  -2 3.16751 3.09338   6
   5   4   2 0.96305 2.35536   6
  -5   4  -2 4.02556 1.38012   5
   6  -4   2 23.6280  3.6095   2
  -6  -4  -2 33.7418  3.5309   3
   6  -4   2 33.7727  3.4711   4
  -6  -4  -2 30.3338  3.4561   5
   6  -4   2 23.9658  4.6977   6
   6   4   2 21.5841  5.0640   6
  -6   4  -2 35.7402  3.7804   3
   6   4   2 33.9571  3.9158   2
   6   4   2 34.5141  3.8244   4
  -6   4  -2 26.4742  3.4075   5
  -7  -4  -2 0.07561 1.19896   3
   7  -4   2 1.12051 1.23032   4
   7  -4   2 0.95961 1.84645   6
   7  -4   2 0.40424 1.32274   2
  -7  -4  -2 0.48227 1.08836   5
   7   4   2 1.43179 2.91371   6
  -7   4  -2 0.19548 1.05712   3
   7   4   2 0.14549 0.96666   4
  -7   4  -2 1.02456 1.13411   5
   7   4   2 -0.9092  1.0090   2
  -8  -4  -2 3.02046 1.41483   3
  -8  -4  -2 0.50750 1.35911   5
   8  -4   2 0.43412 1.38818   4
   8  -4   2 -0.8732  1.6884   2
   8  -4   2 1.56876 1.77095   6
  -8   4  -2 0.22351 1.09715   5
  -8   4  -2 -1.6237  1.2214   3
   8   4   2 -0.7951  1.6504   2
   8   4   2 -0.6810  2.2686   6
   8   4   2 -2.3970  1.1628   4
  -9  -4  -2 2.25316 1.86385   5
   9  -4   2 1.04845 1.62969   4
   9  -4   2 0.39909 2.18017   2
  -9  -4  -2 0.24278 1.31584   3
   9  -4   2 2.08171 1.96868   6
  -9   4  -2 -0.4779  1.4635   5
  -9   4  -2 -0.3858  1.1941   3
   9   4   2 1.85798 1.79361   2
   9   4   2 -0.7656  3.1165   6
   9   4   2 0.01274 1.61485   4
 -10  -4  -2 37.7476  4.7161   3
  10  -4   2 35.9233  5.4012   2
  10  -4   2 29.0454  5.7509   6
  10  -4   2 36.1894  4.6064   4
 -10  -4  -2 28.8425  4.4955   5
 -10   4  -2 27.1785  4.1378   3
  10   4   2 34.4901  4.9928   2
 -10   4  -2 32.7302  4.6683   5
  10   4   2 27.1317  4.4577   4
  10   4   2 23.7876  5.9893   6
  11  -4   2 0.90750 1.88720   4
  11  -4   2 -0.2261  2.0625   2
  11  -4   2 -4.7934  3.3093   6
 -11  -4  -2 2.25762 2.39203   5
 -11  -4  -2 -1.5521  1.8717   3
  11   4   2 2.30950 2.28694   4
  11   4   2 -2.7445  2.8228   6
 -11   4  -2 -2.0830  1.2811   3
 -11   4  -2 2.69547 1.95621   5
  11   4   2 0.45068 2.20824   2
  12  -4   2 4.73853 5.79539   6
 -12  -4  -2 10.1740  3.4291   5
  12  -4   2 17.1031  4.3699   2
 -12  -4  -2 18.7796  4.0344   3
  12   4   2 12.7396  3.4445   2
 -12   4  -2 15.6086  3.7048   5
  12   4   2 19.5569  3.9010   4
 -12   4  -2 10.1491  3.0868   3
  13  -4   2 3.82398 3.15419   2
 -13  -4  -2 2.30157 2.41680   5
  13  -4   2 -8.4084  3.8762   6
 -13  -4  -2 3.32211 2.81456   3
 -13   4  -2 11.4702  3.3319   3
  13   4   2 4.06475 2.65877   2
 -13   4  -2 0.16418 1.94913   5
  13   4   2 2.89889 2.72900   4
 -14  -4  -2 -0.6513  2.4606   3
  14  -4   2 0.32100 3.56532   2
 -14  -4  -2 -1.8871  2.1679   5
  14  -4   2 -14.943   4.395   6
 -14   4  -2 4.08558 2.78646   5
  14   4   2 -1.2612  2.3590   4
  14   4   2 2.02663 2.80384   2
 -14   4  -2 -0.5126  2.0874   3
 -15  -4  -2 -0.7252  2.4435   3
  15  -4   2 -0.1417  3.6209   2
 -15  -4  -2 2.27693 3.07328   5
 -15   4  -2 10.3784  3.7561   5
  15   4   2 2.25607 2.85494   4
 -15   4  -2 1.16092 2.43719   3
 -16  -4  -2 0.27462 3.42199   3
  16  -4   2 1.93905 3.91393   2
 -16  -4  -2 0.70349 3.26837   5
 -16   4  -2 -2.2814  2.2791   5
 -16   4  -2 1.89098 3.04962   3
 -16  -5   2 4.02228 3.99743   3
 -16  -5   2 5.34589 4.20895   5
 -16   5   2 0.07495 2.91602   5
 -16   5   2 2.43269 3.53171   3
  16   5  -2 1.70120 3.35525   4
 -15  -5   2 1.90326 3.36555   3
  15  -5  -2 -0.3447  3.4183   4
 -15  -5   2 4.78961 3.90178   5
 -15   5   2 2.42735 2.62890   5
 -15   5   2 4.64895 3.39126   3
  15   5  -2 0.61590 3.49707   4
 -14  -5   2 28.7912  5.5892   5
  14  -5  -2 31.6076  5.7274   4
 -14  -5   2 19.4113  4.4866   3
  14   5  -2 18.4195  4.7229   4
 -14   5   2 24.9705  4.8429   5
 -14   5   2 16.6081  4.5059   3
  13  -5  -2 9.97140 3.83418   4
  13  -5  -2 8.56004 3.68248   2
 -13  -5   2 12.3126  3.5801   3
 -13  -5   2 14.5764  3.9736   5
 -13   5   2 5.42062 2.84358   3
 -13   5   2 8.33313 3.40587   5
  13   5  -2 9.24807 3.42466   4
  12  -5  -2 5.61649 2.90164   2
 -12  -5   2 3.89168 2.68415   5
 -12  -5   2 2.22512 2.69162   3
  12  -5  -2 0.71326 2.92724   4
 -12   5   2 0.22754 2.19300   3
 -12   5   2 2.38777 2.19189   5
  12   5  -2 1.65927 2.25212   4
 -11  -5   2 35.0953  5.2581   3
  11  -5  -2 26.2550  5.8207   6
  11  -5  -2 35.5936  5.3623   2
  11  -5  -2 37.5594  5.7035   4
 -11  -5   2 39.8245  5.5445   5
  11   5  -2 28.9745  4.9378   4
 -11   5   2 31.5941  4.7988   3
 -11   5   2 34.6073  5.0766   5
  10  -5  -2 -1.1601  1.9343   6
 -10  -5   2 1.06877 2.30668   5
  10  -5  -2 -3.2546  1.7980   2
  10  -5  -2 1.07791 2.37494   4
 -10  -5   2 0.41070 1.77869   3
 -10   5   2 0.97083 1.59076   5
  10   5  -2 0.86709 1.67890   2
 -10   5   2 1.43191 1.91197   3
  10   5  -2 -0.9949  1.5942   4
  -9  -5   2 0.36986 1.59126   5
   9  -5  -2 1.57314 1.96397   4
   9  -5  -2 0.37876 1.83818   6
   9  -5  -2 1.34909 1.81466   2
  -9  -5   2 6.22814 2.16076   3
  -9   5   2 2.23159 3.41735   6
   9   5  -2 -0.3701  1.2942   4
  -9   5   2 0.02192 1.62166   3
   9   5  -2 5.66506 2.07663   2
  -9   5   2 0.88738 1.40378   5
   8  -5  -2 -0.6012  1.4872   4
   8  -5  -2 1.23499 1.86352   6
  -8  -5   2 1.77056 1.52252   3
   8  -5  -2 0.86837 1.70015   2
  -8  -5   2 1.58996 1.85050   5
   8   5  -2 0.20308 1.31769   2
  -8   5   2 -0.3865  2.3861   6
  -8   5   2 3.15631 1.70557   3
  -8   5   2 1.31625 1.47820   5
   8   5  -2 -1.4126  2.0268   6
   8   5  -2 1.46248 1.48754   4
   7  -5  -2 66.5139  8.5667   6
  -7  -5   2 71.1857  5.9675   3
  -7  -5   2 76.9013  6.1629   5
   7  -5  -2 79.5432  6.4350   2
   7  -5  -2 65.4683  6.0320   4
   7   5  -2 67.2012  8.2605   6
  -7   5   2 52.5938  8.9051   6
  -7   5   2 73.4278  6.1644   1
  -7   5   2 58.1247  6.0484   2
   7   5  -2 84.9029  6.3740   4
  -7   5   2 68.2473  5.6954   3
   7   5  -2 63.8722  5.7011   2
  -7   5   2 76.6190  5.9814   5
  -6  -5   2 60.5060  4.4023   1
  -6  -5   2 55.8056  5.1430   5
   6  -5  -2 56.1661  5.3646   2
   6  -5  -2 64.6832  7.8435   6
   6  -5  -2 53.1099  5.1523   4
  -6  -5   2 66.1135  5.2703   3
  -6   5   2 58.3918  4.9866   3
   6   5  -2 57.7897  7.3796   6
  -6   5   2 66.8035  5.4031   1
   6   5  -2 63.7443  5.0752   2
  -6   5   2 53.5696  8.3667   6
  -6   5   2 63.5243  5.6322   2
   6   5  -2 56.5997  5.2557   4
  -6   5   2 59.6274  5.0502   5
  -5  -5   2 82.1908  6.0620   1
   5  -5  -2 84.8678  7.0921   2
   5  -5  -2 86.4683  6.8134   4
   5  -5  -2 75.5620  9.8008   6
  -5  -5   2 92.6121  6.7047   3
  -5  -5   2 89.4595  6.7469   5
  -5   5   2 103.294  10.863   6
   5   5  -2 87.4339  6.7225   2
   5   5  -2 88.6752  9.6982   6
  -5   5   2 87.1017  6.4871   5
  -5   5   2 80.4274  6.7912   1
   5   5  -2 94.1583  6.9852   4
  -5   5   2 92.9685  7.2012   2
  -5   5   2 86.2064  6.4400   3
   4  -5  -2 651.662  46.151   2
  -4  -5   2 685.671  43.841   1
  -4  -5   2 700.034  43.038   3
   4  -5  -2 667.238  65.017   6
  -4  -5   2 688.390  43.640   5
   4  -5  -2 703.913  44.295   4
   4   5  -2 672.527  64.274   6
   4   5  -2 651.737  44.298   4
  -4   5   2 657.040  43.284   5
  -4   5   2 666.027  42.738   3
   4   5  -2 678.106  45.774   2
  -4   5   2 716.607  46.278   2
  -4   5   2 702.759  44.564   1
  -4   5   2 705.148  65.157   6
  -3  -5   2 43.6488  3.7502   5
  -3  -5   2 51.4154  3.4359   1
   3  -5  -2 38.2055  3.8867   2
  -3  -5   2 43.6531  3.6644   3
   3  -5  -2 46.5406  3.9223   4
  -3   5   2 40.6563  6.6626   6
  -3   5   2 37.8683  3.7349   1
   3   5  -2 44.1390  3.6128   5
  -3   5   2 39.7666  3.8780   2
   3   5  -2 45.4284  3.6883   2
   3   5  -2 40.9072  3.7918   4
  -3   5   2 38.6295  3.3094   3
   3   5  -2 49.7789  6.2651   6
  -3   5   2 42.0536  3.3946   5
   3   5  -2 49.6451  3.6410   3
  -2  -5   2 64.2358  4.7574   1
  -2  -5   2 68.6577  5.0332   5
   2  -5  -2 62.0649  5.0206   4
  -2  -5   2 58.9015  4.8358   3
  -2   5   2 68.0775  8.8727   6
   2   5  -2 69.2769  4.8061   3
   2   5  -2 65.2184  5.0164   2
   2   5  -2 66.3424  5.0754   4
   2   5  -2 67.8170  8.2186   6
  -2   5   2 65.2236  4.4963   3
  -2   5   2 65.9764  5.0236   1
  -2   5   2 68.7666  5.3691   2
   2   5  -2 61.9790  4.7806   5
  -2   5   2 59.7076  4.5014   5
  -1  -5   2 81.6493  5.7439   5
  -1  -5   2 74.9340  5.6161   3
   1  -5  -2 73.5236  5.7827   4
  -1   5   2 77.4117  5.0862   3
   1   5  -2 75.3137  5.4697   3
  -1   5   2 80.1146  5.7032   1
  -1   5   2 78.0215  5.2137   5
   1   5  -2 73.1032  5.6773   4
  -1   5   2 91.9062 10.4526   6
   1   5  -2 80.1386  9.6779   6
   1   5  -2 68.7444  5.4855   5
   1   5  -2 89.2234  5.9635   2
  -1   5   2 71.9959  6.0215   2
   0  -5  -2 123.508   9.340   4
   0   5  -2 147.535  14.422   6
   0   5  -2 138.038   9.043   5
   0   5  -2 125.308   8.847   3
   0   5  -2 132.956   9.610   2
   0   5   2 147.314   9.827   2
   0   5   2 115.233  14.794   6
   0   5   2 133.824   9.099   1
   1  -5   2 6.99142 1.47385   2
  -1  -5  -2 3.99459 1.27276   4
   1  -5   2 6.81497 1.30346   4
   1  -5   2 5.03749 1.59683   6
   1   5   2 5.15420 0.95190   1
  -1   5  -2 7.06244 1.22245   5
  -1   5  -2 8.07636 1.43652   2
  -1   5  -2 7.18085 4.07673   6
   1   5   2 5.73347 1.32191   2
   1   5   2 10.0927  4.4135   6
  -1   5  -2 5.62974 1.06818   3
   2  -5   2 229.017  21.816   6
  -2  -5  -2 203.654  13.758   3
   2  -5   2 233.000  15.481   2
  -2  -5  -2 225.026  14.014   5
   2  -5   2 214.726  14.505   4
  -2   5  -2 211.804  15.392   2
  -2   5  -2 224.660  22.322   6
   2   5   2 229.151  22.266   6
   2   5   2 215.444  15.422   2
   2   5   2 223.335  14.233   1
  -2   5  -2 202.542  14.365   5
  -2   5  -2 216.434  14.239   3
  -3  -5  -2 368.661  24.421   5
  -3  -5  -2 362.767  24.045   3
   3  -5   2 395.352  24.969   4
   3  -5   2 360.367  26.315   2
   3  -5   2 415.820  37.247   6
  -3   5  -2 381.418  24.467   3
   3   5   2 374.312  26.318   2
  -3   5  -2 374.292  26.398   2
  -3   5  -2 384.463  24.799   5
   3   5   2 377.798  25.340   4
  -3   5  -2 415.893  37.688   6
   3   5   2 396.719  37.362   6
   4  -5   2 485.349  47.088   6
  -4  -5  -2 478.906  30.774   3
  -4  -5  -2 490.037  31.242   5
   4  -5   2 515.209  33.527   2
   4  -5   2 506.962  31.758   4
  -4   5  -2 450.610  33.487   2
  -4   5  -2 468.045  31.062   3
   4   5   2 513.642  47.207   6
   4   5   2 456.217  32.076   4
  -4   5  -2 537.932  47.536   6
   4   5   2 495.967  33.430   2
  -4   5  -2 472.762  31.499   5
   5  -5   2 179.694  12.450   2
  -5  -5  -2 169.693  11.342   5
  -5  -5  -2 166.997  11.163   3
   5  -5   2 170.918  17.421   6
   5  -5   2 161.343  11.448   4
  -5   5  -2 176.096  18.213   6
  -5   5  -2 160.792  11.387   3
   5   5   2 155.875  11.796   4
  -5   5  -2 179.062  12.589   2
  -5   5  -2 167.065  11.589   5
   5   5   2 152.724  12.168   2
   5   5   2 157.394  17.378   6
  -6  -5  -2 88.2775  6.9233   5
   6  -5   2 106.180   7.192   4
   6  -5   2 94.9004 10.8877   6
  -6  -5  -2 98.0295  6.9116   3
   6  -5   2 92.6695  7.6680   2
  -6   5  -2 94.2412  7.0771   3
  -6   5  -2 87.5616 11.3869   6
   6   5   2 76.8496  7.1676   4
   6   5   2 86.1542 10.8271   6
  -6   5  -2 92.2727  7.1389   5
   6   5   2 97.9758  7.6275   2
  -7  -5  -2 54.6517  4.8504   5
   7  -5   2 51.9948  7.8272   6
   7  -5   2 49.4122  5.7914   2
  -7  -5  -2 53.3087  4.7083   3
   7  -5   2 52.3086  4.7719   4
   7   5   2 55.3603  5.8812   4
   7   5   2 53.9453  7.9072   6
  -7   5  -2 55.3108  5.7079   5
  -7   5  -2 53.9057  5.5367   3
   7   5   2 61.6587  6.2996   2
   8  -5   2 5.64184 1.93018   4
   8  -5   2 6.46660 2.33391   2
  -8  -5  -2 7.90263 2.07054   3
   8  -5   2 5.29812 2.69085   6
  -8  -5  -2 5.79224 1.89389   5
  -8   5  -2 5.36889 1.86010   5
   8   5   2 5.71269 2.41057   2
   8   5   2 11.1962  2.5048   4
   8   5   2 4.46460 3.49810   6
  -8   5  -2 2.61434 1.67906   3
  -9  -5  -2 9.64371 2.29670   3
   9  -5   2 9.22105 2.57733   4
   9  -5   2 6.66707 3.11635   6
  -9  -5  -2 11.6615  2.6856   5
   9  -5   2 7.99043 2.59469   2
   9   5   2 13.3896  3.1320   4
   9   5   2 4.76417 3.54457   6
  -9   5  -2 4.12129 1.99097   5
   9   5   2 15.2183  3.3581   2
  -9   5  -2 5.84176 1.99262   3
 -10  -5  -2 15.0442  3.2408   5
  10  -5   2 7.00865 3.39035   6
 -10  -5  -2 11.4056  2.9164   3
  10  -5   2 8.53578 2.66774   4
  10  -5   2 9.52485 3.39072   2
  10   5   2 7.18463 3.86652   6
 -10   5  -2 17.2197  3.2814   5
  10   5   2 12.2866  3.1793   2
  10   5   2 13.7895  3.1507   4
 -10   5  -2 12.9302  2.9641   3
  11  -5   2 22.3171  4.6516   2
  11  -5   2 37.0871  4.8434   4
  11  -5   2 31.8382  6.3097   6
 -11  -5  -2 35.3653  5.0145   5
 -11  -5  -2 30.4723  4.6281   3
 -11   5  -2 27.6188  4.6578   5
 -11   5  -2 20.9499  4.0627   3
  11   5   2 28.0045  4.7865   4
  11   5   2 40.2945  7.1653   6
  11   5   2 27.4576  5.0524   2
  12  -5   2 -3.7612  5.2719   6
 -12  -5  -2 19.2930  3.9658   3
  12  -5   2 16.0720  4.0709   2
 -12  -5  -2 25.5898  4.6650   5
  12   5   2 26.7941  4.7115   2
  12   5   2 16.0420  3.8050   4
 -12   5  -2 18.8288  3.8857   3
 -12   5  -2 19.3554  3.8540   5
  13  -5   2 4.54306 6.78728   6
  13  -5   2 27.2284  5.5882   2
 -13  -5  -2 23.9111  4.8349   3
 -13  -5  -2 29.2937  5.1860   5
  13   5   2 28.1758  5.1379   2
 -13   5  -2 23.5132  4.4772   5
  13   5   2 41.0636  6.1864   4
 -13   5  -2 14.7894  3.7054   3
 -14  -5  -2 10.1924  3.7324   3
 -14  -5  -2 6.15515 3.04841   5
  14  -5   2 3.87979 3.48989   2
  14  -5   2 -10.005   4.520   6
 -14   5  -2 2.21326 2.87137   5
  14   5   2 9.92648 3.31652   2
 -14   5  -2 5.21960 2.53236   3
  14   5   2 5.68200 3.32114   4
 -15  -5  -2 4.85191 3.03694   3
  15  -5   2 -5.4374  3.4051   2
 -15  -5  -2 1.46194 3.14695   5
  15   5   2 7.72867 3.81705   4
 -15   5  -2 3.57780 2.71542   3
 -15   5  -2 1.84373 3.14665   5
 -16  -5  -2 -0.0161  3.3379   5
 -16  -5  -2 -3.2550  3.4292   3
  16  -5   2 -4.6168  3.6948   2
 -16   5  -2 0.40731 2.60503   5
 -16  -6   2 4.46826 4.17263   3
 -16  -6   2 0.49512 3.54990   5
  16   6  -2 -2.8967  3.6005   4
 -15  -6   2 5.19644 3.62796   3
  15  -6  -2 0.59753 3.41288   4
 -15  -6   2 5.25393 3.93599   5
  15   6  -2 4.46069 3.44314   4
 -15   6   2 2.41862 3.31086   5
 -15   6   2 -0.8693  2.4162   3
 -14  -6   2 2.61624 2.86873   3
 -14  -6   2 -0.0079  3.2418   5
  14  -6  -2 -2.2178  2.7703   4
  14  -6  -2 1.55283 3.42735   2
 -14   6   2 -0.4000  2.6463   3
 -14   6   2 -0.1517  2.4906   5
  14   6  -2 -3.1273  2.7848   4
  13  -6  -2 0.21515 3.02395   4
  13  -6  -2 1.75025 2.99144   2
 -13  -6   2 0.15084 2.32758   5
 -13  -6   2 2.67459 2.82229   3
 -13   6   2 1.05758 2.68811   5
 -13   6   2 -0.5606  2.0904   3
  13   6  -2 0.77443 2.91156   4
  12  -6  -2 1.95653 2.83959   4
 -12  -6   2 1.42320 2.33607   3
 -12  -6   2 -1.2622  2.3649   5
  12  -6  -2 -3.5012  2.3087   2
  12  -6  -2 -0.1675  2.8567   6
 -12   6   2 -0.9042  2.2237   3
  12   6  -2 -0.1721  2.0115   4
 -12   6   2 -1.0797  1.6783   5
 -11  -6   2 8.28384 3.10131   5
  11  -6  -2 1.52915 2.69477   6
  11  -6  -2 4.65534 2.94585   4
  11  -6  -2 5.28137 2.91006   2
 -11  -6   2 7.62600 3.19721   3
 -11   6   2 6.77446 3.00691   3
 -11   6   2 1.65691 1.99169   5
  11   6  -2 4.49441 2.49934   4
 -10  -6   2 19.4059  3.7530   5
  10  -6  -2 14.3841  3.7362   4
  10  -6  -2 15.8674  3.4284   2
 -10  -6   2 6.24807 2.61011   3
  10  -6  -2 5.29701 3.38699   6
  10   6  -2 18.1832  3.3188   2
 -10   6   2 10.6120  2.8992   3
  10   6  -2 8.24931 2.71209   4
 -10   6   2 11.5487  2.9109   5
  -9  -6   2 -0.4746  1.8047   5
   9  -6  -2 3.03153 2.09136   2
  -9  -6   2 2.14570 1.80563   3
   9  -6  -2 2.21546 2.12764   6
   9  -6  -2 0.50176 2.00782   4
  -9   6   2 -0.1256  2.7568   6
  -9   6   2 0.45924 1.66734   5
   9   6  -2 -2.2093  1.3580   2
  -9   6   2 -0.3021  1.4112   3
   9   6  -2 -1.3634  1.2053   4
  -8  -6   2 0.05997 1.32176   3
   8  -6  -2 2.45620 2.17324   6
   8  -6  -2 1.18586 1.74379   4
   8  -6  -2 1.77112 1.64211   2
  -8  -6   2 2.15784 1.90320   5
  -8   6   2 0.10689 2.82431   6
  -8   6   2 1.76176 1.54969   3
   8   6  -2 2.55200 1.59270   2
   8   6  -2 1.76058 1.59021   4
  -8   6   2 0.40430 1.37612   5
  -7  -6   2 3.12091 1.86198   5
   7  -6  -2 -0.1073  1.4484   6
   7  -6  -2 5.97010 2.08232   2
  -7  -6   2 6.03033 2.05607   3
   7  -6  -2 3.10224 1.85267   4
  -7   6   2 4.29014 1.66128   3
   7   6  -2 2.86506 1.56376   2
  -7   6   2 3.38924 1.51629   5
  -7   6   2 6.47061 2.09025   2
   7   6  -2 1.29401 2.22677   6
  -7   6   2 7.22415 3.35527   6
   7   6  -2 3.30692 1.71612   4
  -6  -6   2 18.7746  2.8337   5
  -6  -6   2 17.7358  2.0406   1
  -6  -6   2 13.2397  2.3870   3
   6  -6  -2 12.7964  2.6397   2
   6  -6  -2 13.0505  3.4799   6
   6  -6  -2 16.1871  2.7778   4
  -6   6   2 10.7152  2.4568   1
   6   6  -2 9.69794 2.30293   4
  -6   6   2 13.5419  4.3471   6
   6   6  -2 13.9875  2.4713   2
  -6   6   2 12.9310  2.3646   3
  -6   6   2 16.5079  3.0307   2
  -6   6   2 13.8324  2.4272   5
   6   6  -2 13.4614  3.2759   6
  -5  -6   2 5.99440 1.88998   5
   5  -6  -2 11.1372  2.2189   2
   5  -6  -2 10.0296  2.1893   4
  -5  -6   2 7.65274 1.87684   3
  -5  -6   2 11.2453  1.5172   1
   5  -6  -2 8.47533 2.68453   6
   5   6  -2 7.41909 1.99198   4
  -5   6   2 12.8598  2.0263   5
  -5   6   2 9.99906 3.88405   6
  -5   6   2 7.34780 2.03585   1
  -5   6   2 12.7092  2.0087   3
   5   6  -2 10.1429  1.9056   2
  -5   6   2 11.8444  2.3146   2
   5   6  -2 6.93802 2.85032   6
   4  -6  -2 106.679   7.912   4
   4  -6  -2 92.7076  8.1539   2
  -4  -6   2 113.275   7.869   5
   4  -6  -2 124.395  12.213   6
  -4  -6   2 102.581   7.615   3
  -4  -6   2 100.349   7.276   1
  -4   6   2 93.3095 12.1249   6
   4   6  -2 106.560   8.018   4
   4   6  -2 104.666   7.879   2
   4   6  -2 107.895  11.572   6
  -4   6   2 103.719   8.310   2
  -4   6   2 105.210   7.357   3
  -4   6   2 103.155   7.418   5
  -4   6   2 106.077   7.976   1
  -3  -6   2 4.83596 1.44469   5
  -3  -6   2 5.71197 1.50006   3
   3  -6  -2 5.08035 1.65115   2
  -3  -6   2 7.41865 1.30921   1
   3  -6  -2 10.0329  1.9029   4
   3   6  -2 6.87919 1.50198   2
  -3   6   2 6.83581 1.60766   2
   3   6  -2 5.60721 1.30908   3
   3   6  -2 4.55018 2.77064   6
  -3   6   2 8.59706 1.38619   3
  -3   6   2 5.81165 3.95253   6
  -3   6   2 10.7588  1.4983   5
   3   6  -2 4.19825 1.38820   4
   3   6  -2 6.73639 1.43991   5
  -3   6   2 5.08004 1.42620   1
  -2  -6   2 35.4021  3.5453   3
  -2  -6   2 34.3298  3.5231   5
   2  -6  -2 31.2172  3.6496   4
   2   6  -2 37.5827  3.0203   3
   2   6  -2 33.2445  3.1502   2
  -2   6   2 36.9635  3.7420   1
  -2   6   2 33.0666  2.6985   5
  -2   6   2 36.4500  2.7354   3
   2   6  -2 34.3288  2.9888   5
  -2   6   2 32.2540  3.8133   2
   2   6  -2 30.7157  5.2949   6
  -2   6   2 37.3394  6.2157   6
   2   6  -2 31.3397  3.5907   4
   1  -6  -2 11.1755  1.8932   4
  -1  -6   2 9.49855 1.71650   5
  -1  -6   2 10.8128  1.7903   3
  -1   6   2 9.60398 4.86882   6
  -1   6   2 12.5194  1.8595   1
  -1   6   2 12.2247  2.0728   2
  -1   6   2 12.2378  1.2541   5
   1   6  -2 11.0776  1.6733   3
   1   6  -2 8.95258 3.64122   6
   1   6  -2 16.2508  2.1256   4
   1   6  -2 12.7988  1.9030   2
  -1   6   2 12.7618  1.2950   3
   1   6  -2 8.80128 1.55815   5
   0  -6  -2 16.6171  2.4176   4
   0   6  -2 13.2016  1.8212   5
   0   6   2 14.7057  1.8785   1
   0   6  -2 14.0493  1.8088   3
   0   6   2 8.71383 4.40316   6
   0   6  -2 12.6441  3.8945   6
   0   6   2 11.3905  2.0312   2
   0   6  -2 16.5680  2.2852   2
   1  -6   2 -0.4012  0.6979   4
  -1  -6  -2 0.31747 0.86382   4
   1  -6   2 -0.4905  0.7080   6
   1  -6   2 -0.5527  0.7370   2
  -1   6  -2 -0.6721  0.4803   3
  -1   6  -2 0.03557 0.53218   5
  -1   6  -2 1.80104 3.77361   6
   1   6   2 -0.6359  4.2642   6
   1   6   2 0.81133 0.85615   2
  -1   6  -2 0.15024 0.63610   2
   2  -6   2 0.35341 1.22409   6
   2  -6   2 0.06131 0.96385   2
  -2  -6  -2 0.95609 0.56179   3
   2  -6   2 0.32288 0.71488   4
  -2  -6  -2 0.48874 0.54318   5
   2   6   2 2.33274 3.17588   6
  -2   6  -2 -1.0960  2.9719   6
  -2   6  -2 0.48463 0.63173   5
  -2   6  -2 -0.2404  0.7190   2
  -2   6  -2 0.70493 0.72549   3
   2   6   2 0.30737 0.82190   2
   3  -6   2 4.04059 1.80446   6
  -3  -6  -2 7.15083 1.20873   5
   3  -6   2 5.55437 1.57112   2
  -3  -6  -2 6.77533 1.11338   3
   3  -6   2 2.80081 1.08895   4
   3   6   2 7.57106 1.73133   4
  -3   6  -2 5.79007 1.37658   3
  -3   6  -2 6.04278 1.44223   5
   3   6   2 7.30169 1.74540   2
  -3   6  -2 8.36321 3.45095   6
  -3   6  -2 4.02399 1.53159   2
   3   6   2 2.94179 3.00685   6
   4  -6   2 1.97582 1.55225   6
   4  -6   2 6.34210 1.66594   2
  -4  -6  -2 2.28622 1.01434   5
  -4  -6  -2 2.52723 0.99059   3
   4  -6   2 2.79659 1.19359   4
   4   6   2 2.03473 1.17019   4
  -4   6  -2 4.92047 1.30075   3
  -4   6  -2 0.78068 1.01814   5
  -4   6  -2 2.31297 1.21076   2
   4   6   2 0.54301 3.11059   6
  -4   6  -2 3.30014 3.08131   6
   4   6   2 2.63017 1.37432   2
   5  -6   2 10.2702  1.9342   4
   5  -6   2 7.76850 2.14790   2
  -5  -6  -2 8.11592 1.64039   3
   5  -6   2 7.67086 2.57846   6
  -5  -6  -2 10.6057  1.8161   5
  -5   6  -2 9.04966 2.16543   2
  -5   6  -2 10.3538  2.0011   3
   5   6   2 8.44162 2.07979   4
  -5   6  -2 7.96067 3.49832   6
  -5   6  -2 12.5950  2.1571   5
   5   6   2 5.48477 3.04091   6
   5   6   2 8.30031 2.05116   2
   6  -6   2 14.0567  2.8670   2
   6  -6   2 12.1156  2.2049   4
  -6  -6  -2 13.3472  2.1743   3
  -6  -6  -2 12.4149  2.1795   5
   6  -6   2 10.5706  3.1214   6
  -6   6  -2 13.7231  2.5165   3
   6   6   2 11.4515  2.4230   4
  -6   6  -2 10.1205  4.1344   6
   6   6   2 10.3269  3.5080   6
   6   6   2 11.0040  2.4529   2
  -6   6  -2 11.6898  2.4207   5
   7  -6   2 12.1405  2.5096   4
   7  -6   2 14.0319  2.9274   2
   7  -6   2 13.4323  3.5776   6
  -7  -6  -2 8.55771 2.01214   3
  -7  -6  -2 12.5519  2.3579   5
  -7   6  -2 7.05756 4.01910   6
  -7   6  -2 9.70389 2.30519   5
   7   6   2 15.8796  2.8797   4
  -7   6  -2 8.62287 2.25439   3
   7   6   2 10.1919  2.6565   2
   7   6   2 10.7688  3.7226   6
  -8  -6  -2 1.24756 1.60959   5
   8  -6   2 -0.7295  1.6598   6
   8  -6   2 2.79453 1.92071   2
   8  -6   2 2.11296 1.74509   4
  -8  -6  -2 0.94773 1.44910   3
   8   6   2 1.06101 1.52568   4
   8   6   2 0.18137 1.39857   2
  -8   6  -2 0.70793 1.53438   5
   8   6   2 -2.4207  2.4784   6
  -8   6  -2 0.98645 1.31649   3
   9  -6   2 5.00649 2.58050   2
  -9  -6  -2 2.46447 1.91394   5
   9  -6   2 1.10075 1.79785   4
  -9  -6  -2 3.41388 1.81242   3
   9  -6   2 1.65089 2.51440   6
  -9   6  -2 1.50283 1.50783   3
   9   6   2 0.38818 3.12413   6
  -9   6  -2 4.73602 2.10684   5
   9   6   2 1.80699 1.86406   4
   9   6   2 4.18999 2.28379   2
 -10  -6  -2 4.65348 2.44936   5
  10  -6   2 5.88245 2.48936   4
 -10  -6  -2 5.45126 2.11848   3
  10  -6   2 6.28303 3.03681   2
  10  -6   2 1.08820 2.13772   6
 -10   6  -2 4.02284 2.14791   5
  10   6   2 6.75727 2.62839   4
  10   6   2 1.48127 3.33585   6
 -10   6  -2 4.82808 2.16743   3
  10   6   2 2.46708 2.15342   2
 -11  -6  -2 1.44827 2.23596   3
  11  -6   2 3.17843 2.39504   6
  11  -6   2 0.10971 2.60594   2
 -11  -6  -2 4.45329 2.42504   5
 -11   6  -2 2.75339 1.72840   3
  11   6   2 -1.7856  3.2170   6
  11   6   2 0.55868 2.06164   4
  11   6   2 3.35840 2.42112   2
 -11   6  -2 0.24298 1.91340   5
 -12  -6  -2 0.65266 2.27406   3
  12  -6   2 4.49334 2.39930   6
 -12  -6  -2 2.39050 2.47020   5
  12  -6   2 13.2554  3.7897   2
 -12   6  -2 2.83741 2.31851   5
 -12   6  -2 -0.2131  1.7994   3
  12   6   2 4.21606 2.88870   4
  12   6   2 7.38434 3.00236   2
 -13  -6  -2 8.90008 3.76080   5
 -13  -6  -2 6.98931 3.29096   3
  13  -6   2 5.26276 3.53591   2
  13   6   2 10.1680  3.5658   2
 -13   6  -2 9.50385 3.22652   3
 -13   6  -2 3.18592 3.00867   5
  13   6   2 10.5886  3.5054   4
 -14  -6  -2 3.80458 2.81783   3
  14  -6   2 -0.3858  3.1094   2
 -14  -6  -2 6.09143 3.12772   5
 -14   6  -2 2.31586 2.48197   5
  14   6   2 5.34074 3.01780   2
 -14   6  -2 -0.0900  2.6043   3
  14   6   2 3.83499 3.10351   4
 -15  -6  -2 6.18027 3.87162   5
 -15  -6  -2 2.56167 3.47441   3
  15  -6   2 0.51453 4.05775   2
 -15   6  -2 8.24456 3.74553   3
 -15   6  -2 -1.1849  2.2173   5
  15   6   2 11.3344  4.1637   4
 -16  -6  -2 1.09450 3.74750   5
  16  -6   2 1.82930 3.85044   2
 -16  -6  -2 1.72809 3.66928   3
 -16  -7   2 4.25063 3.81470   5
 -16  -7   2 8.12056 4.45614   3
 -15  -7   2 -1.6573  3.1073   3
 -15  -7   2 5.07964 3.83315   5
 -15   7   2 2.40941 3.44697   3
 -15   7   2 -2.0074  2.6874   5
  15   7  -2 0.72929 3.36897   4
  14  -7  -2 -0.3654  3.1106   2
 -14  -7   2 0.52511 2.91806   3
  14  -7  -2 -3.0380  2.4140   4
 -14  -7   2 4.31637 3.93759   5
 -14   7   2 -1.7501  2.3641   5
 -14   7   2 4.24684 3.06705   3
  14   7  -2 1.52666 2.58391   4
  13  -7  -2 0.47842 2.84317   2
 -13  -7   2 -1.3755  2.6191   3
 -13  -7   2 0.18661 2.28404   5
  13  -7  -2 -1.8642  2.8354   4
 -13   7   2 -2.0730  2.4741   5
 -13   7   2 -0.4959  2.0597   3
  13   7  -2 -0.4121  2.6366   4
  12  -7  -2 19.8190  4.6213   4
  12  -7  -2 17.3135  4.0029   2
  12  -7  -2 18.2049  5.3760   6
 -12  -7   2 23.6496  4.4821   3
 -12  -7   2 19.0925  4.4701   5
 -12   7   2 23.9668  4.7355   5
 -12   7   2 18.3623  3.9496   3
  12   7  -2 14.0156  3.8597   4
 -11  -7   2 14.3960  3.2986   3
 -11  -7   2 14.1003  3.8374   5
  11  -7  -2 11.3635  3.4940   4
  11  -7  -2 3.84389 3.41735   6
  11  -7  -2 12.5567  3.3280   2
  11   7  -2 12.2050  3.6069   4
 -11   7   2 11.2603  3.1087   3
 -11   7   2 15.9270  3.8390   5
  10  -7  -2 6.22084 3.11494   6
 -10  -7   2 4.68187 2.83749   5
  10  -7  -2 6.46086 2.63894   2
  10  -7  -2 6.29796 2.81503   4
 -10  -7   2 3.87853 2.30583   3
 -10   7   2 8.60269 2.52208   5
  10   7  -2 7.78838 2.97475   4
 -10   7   2 3.20834 2.03901   3
 -10   7   2 5.05277 4.31743   6
  -9  -7   2 28.6735  4.4845   3
   9  -7  -2 29.9172  4.7389   4
  -9  -7   2 34.4341  4.6766   5
   9  -7  -2 43.8868  5.5409   2
   9  -7  -2 34.6070  6.4510   6
  -9   7   2 33.6916  6.8692   6
   9   7  -2 25.8607  4.5778   4
  -9   7   2 21.8791  4.0197   3
  -9   7   2 33.3630  4.6272   5
  -8  -7   2 12.8900  2.9446   3
  -8  -7   2 16.5569  3.1722   5
   8  -7  -2 15.5792  3.3632   2
   8  -7  -2 13.4787  3.8196   6
   8  -7  -2 15.0700  3.2183   4
   8   7  -2 21.4164  3.3114   2
  -8   7   2 16.8189  3.1226   5
  -8   7   2 21.9754  3.8762   2
  -8   7   2 11.3932  2.6823   3
   8   7  -2 11.3232  2.9698   4
  -8   7   2 12.0973  4.6661   6
   7  -7  -2 -1.3289  1.6331   6
   7  -7  -2 1.39946 1.59910   2
  -7  -7   2 -0.6875  1.5143   3
  -7  -7   2 -1.6829  1.3556   5
   7  -7  -2 3.94285 2.18105   4
  -7   7   2 -2.0727  2.3443   6
  -7   7   2 1.93368 1.60049   2
   7   7  -2 1.99074 1.38728   2
   7   7  -2 -1.3597  1.9961   6
  -7   7   2 0.15684 1.44128   5
   7   7  -2 -1.3306  1.3039   4
  -7   7   2 5.10522 1.60740   3
   6  -7  -2 60.6880  5.6744   4
   6  -7  -2 66.4380  6.9844   2
  -6  -7   2 65.1562  5.5403   3
  -6  -7   2 66.5997  5.7599   5
   6  -7  -2 81.7435  9.2221   6
  -6   7   2 63.7111  5.4175   5
   6   7  -2 53.2239  6.3581   4
   6   7  -2 61.9974  8.2511   6
  -6   7   2 60.9107  9.1885   6
  -6   7   2 64.4960  6.0843   2
  -6   7   2 65.0996  5.3719   3
   6   7  -2 69.8828  5.6874   2
  -5  -7   2 6.74456 1.82727   5
   5  -7  -2 3.31089 1.53018   2
  -5  -7   2 1.96101 1.39851   3
  -5  -7   2 5.30579 1.11925   1
   5  -7  -2 2.10324 1.31926   4
   5  -7  -2 3.26763 1.98806   6
  -5   7   2 1.65070 1.07251   3
  -5   7   2 2.26148 2.82050   6
   5   7  -2 3.28640 2.36200   6
   5   7  -2 0.69365 1.26212   4
  -5   7   2 3.87542 1.59532   2
  -5   7   2 5.65340 1.45115   5
   5   7  -2 3.94171 1.49584   2
  -4  -7   2 25.7011  3.3448   5
  -4  -7   2 28.4966  2.5025   1
  -4  -7   2 26.7003  3.2792   3
   4  -7  -2 28.5600  3.8821   2
   4  -7  -2 23.4001  4.8085   6
   4  -7  -2 30.3983  3.6313   4
   4   7  -2 26.5412  3.2834   2
  -4   7   2 26.3220  2.9971   5
  -4   7   2 27.2167  5.5051   6
   4   7  -2 25.5497  4.7419   6
   4   7  -2 26.3181  3.5885   4
  -4   7   2 32.4058  3.1768   3
  -4   7   2 27.3031  3.7767   2
   3  -7  -2 20.1539  2.8430   4
   3  -7  -2 14.8237  2.7459   2
  -3  -7   2 23.2838  2.4218   1
  -3  -7   2 22.2485  2.8539   5
  -3  -7   2 18.4645  2.6033   3
   3   7  -2 21.6396  2.5411   3
   3   7  -2 22.9154  3.0413   4
   3   7  -2 18.6498  2.4306   5
  -3   7   2 19.3435  2.2739   5
   3   7  -2 17.5988  2.6326   2
  -3   7   2 19.0996  2.9937   2
  -3   7   2 21.0367  2.3627   3
  -3   7   2 25.8156  3.2050   1
  -3   7   2 14.3439  4.4695   6
   3   7  -2 16.4863  4.0079   6
  -2  -7   2 497.451  31.405   3
   2  -7  -2 453.603  32.356   4
  -2  -7   2 508.330  31.868   5
   2   7  -2 498.099  47.287   6
  -2   7   2 495.248  31.276   5
   2   7  -2 494.631  31.641   5
   2   7  -2 525.065  31.273   3
  -2   7   2 445.383  47.629   6
  -2   7   2 522.395  33.981   2
  -2   7   2 490.758  32.463   1
  -2   7   2 488.810  30.878   3
   2   7  -2 509.723  32.480   4
   2   7  -2 473.058  33.514   2
   1  -7  -2 452.352  32.337   4
  -1  -7   2 492.022  31.779   5
  -1  -7   2 492.125  31.354   3
   1   7  -2 503.524  47.402   6
   1   7  -2 505.262  33.627   2
  -1   7   2 533.299  47.963   6
  -1   7   2 506.435  33.874   2
   1   7  -2 487.434  31.603   5
  -1   7   2 476.442  31.086   5
   1   7  -2 505.615  31.201   3
   1   7  -2 506.191  32.374   4
  -1   7   2 468.508  30.671   3
   0  -7  -2 146.025  11.430   4
   0   7  -2 161.345  10.941   5
   0   7   2 164.138  17.486   6
   0   7   2 169.332  10.432   5
   0   7  -2 161.881  17.291   6
   0   7  -2 158.419  11.761   2
   0   7   2 166.908  10.234   3
   0   7   2 152.930  11.845   2
   0   7  -2 155.271  10.754   3
  -1  -7  -2 58.5291  4.8711   4
   1  -7   2 55.5018  6.8182   6
   1  -7   2 56.8091  4.8116   2
   1  -7   2 50.2277  4.4368   4
  -1   7  -2 47.5260  4.0615   3
  -1   7  -2 46.8989  4.1205   5
   1   7   2 55.8028  7.9528   6
   1   7   2 56.5558  4.8224   2
  -1   7  -2 59.5242  7.9837   6
  -1   7  -2 52.1488  4.6422   2
  -2  -7  -2 98.6761  6.7214   5
  -2  -7  -2 101.212   6.607   3
   2  -7   2 104.812   7.969   2
   2  -7   2 101.509  11.254   6
   2  -7   2 102.629   7.373   4
  -2   7  -2 89.1641  7.1327   5
  -2   7  -2 96.2707  7.8851   2
  -2   7  -2 117.394  12.144   6
  -2   7  -2 97.8635  7.1175   3
   2   7   2 96.8436  7.8499   2
   2   7   2 101.053  11.878   6
   3  -7   2 17.7252  3.8902   6
   3  -7   2 25.7184  2.9528   4
  -3  -7  -2 25.0958  2.3741   3
   3  -7   2 22.0882  3.2319   2
  -3  -7  -2 26.0771  2.4798   5
   3   7   2 20.8081  4.9182   6
   3   7   2 25.9162  3.3530   2
  -3   7  -2 22.7736  3.2623   2
  -3   7  -2 21.4433  4.8505   6
  -3   7  -2 23.1371  2.8428   3
  -3   7  -2 22.2365  2.8453   5
   3   7   2 23.8468  3.2715   4
  -4  -7  -2 51.0038  3.9348   5
   4  -7   2 49.5439  4.2232   4
  -4  -7  -2 47.0415  3.7954   3
   4  -7   2 41.6648  6.8895   6
   4  -7   2 51.6355  5.4203   2
  -4   7  -2 47.6546  7.6129   6
   4   7   2 49.5106  5.3395   4
  -4   7  -2 53.0497  5.5237   2
  -4   7  -2 43.8365  4.0909   3
   4   7   2 51.2827  5.4326   2
   4   7   2 51.8663  7.6136   6
  -4   7  -2 49.1010  4.2899   5
   5  -7   2 17.2660  3.9420   6
   5  -7   2 18.5946  2.6031   4
  -5  -7  -2 13.8484  2.1859   3
   5  -7   2 17.6770  3.1173   2
  -5  -7  -2 21.2758  2.5579   5
  -5   7  -2 20.4889  3.2698   2
  -5   7  -2 14.2495  4.3315   6
  -5   7  -2 19.7479  2.7449   3
   5   7   2 17.7782  2.9844   4
   5   7   2 14.5272  4.3677   6
  -5   7  -2 19.1771  2.9075   5
   5   7   2 12.7397  2.7848   2
   6  -7   2 155.473  10.912   4
   6  -7   2 143.073  11.718   2
   6  -7   2 170.636  16.935   6
  -6  -7  -2 151.171  10.516   3
  -6  -7  -2 147.112  10.635   5
  -6   7  -2 157.819  10.991   5
   6   7   2 150.972  11.643   2
  -6   7  -2 145.962  11.884   2
  -6   7  -2 126.007  16.670   6
   6   7   2 156.422  11.421   4
  -6   7  -2 154.763  10.819   3
   6   7   2 152.897  16.521   6
  -7  -7  -2 23.7884  3.2285   5
   7  -7   2 27.8413  4.0783   2
   7  -7   2 23.5375  3.4241   4
   7  -7   2 21.7581  4.8268   6
  -7  -7  -2 26.3137  3.2654   3
  -7   7  -2 21.9731  3.3925   5
  -7   7  -2 20.8049  3.2765   3
  -7   7  -2 16.2120  4.9241   6
   7   7   2 20.9919  4.9541   6
   7   7   2 20.4667  3.5462   2
   7   7   2 28.7394  4.1344   4
   8  -7   2 170.469  16.941   6
   8  -7   2 140.960  11.622   2
   8  -7   2 142.803  10.743   4
  -8  -7  -2 149.396  10.687   5
  -8  -7  -2 139.367  10.382   3
  -8   7  -2 135.152  10.639   3
   8   7   2 135.949  11.383   2
   8   7   2 121.258  10.906   4
  -8   7  -2 161.297  11.031   5
  -8   7  -2 133.209  16.783   6
   8   7   2 147.622  16.460   6
   9  -7   2 15.2853  3.5057   2
  -9  -7  -2 18.0855  3.2244   3
   9  -7   2 8.67363 3.71767   6
   9  -7   2 14.9692  3.2113   4
  -9  -7  -2 20.8819  3.6426   5
   9   7   2 23.0717  4.1039   4
   9   7   2 12.1174  4.4011   6
   9   7   2 12.6482  3.1711   2
  -9   7  -2 18.6397  3.3278   5
  -9   7  -2 16.0036  3.1649   3
 -10  -7  -2 -0.6896  1.8048   3
  10  -7   2 -0.7130  2.0132   2
  10  -7   2 1.79731 2.11125   4
  10  -7   2 2.55649 2.98629   6
 -10  -7  -2 5.22570 2.45735   5
  10   7   2 -0.1343  2.0292   4
  10   7   2 0.74116 1.98871   2
 -10   7  -2 4.75299 2.28668   3
  10   7   2 1.28097 3.26292   6
 -10   7  -2 3.76694 2.30234   5
  11  -7   2 2.06705 3.06811   6
 -11  -7  -2 3.34648 2.51318   5
  11  -7   2 2.54016 2.83485   2
 -11  -7  -2 3.27612 2.57769   3
 -11   7  -2 4.18412 2.32497   5
 -11   7  -2 1.19117 2.06076   3
  11   7   2 2.94581 3.58185   6
  11   7   2 2.34554 2.26473   2
  11   7   2 1.12226 2.18949   4
  12  -7   2 14.2776  4.6158   6
 -12  -7  -2 26.8806  4.6423   5
 -12  -7  -2 19.0905  3.9788   3
  12  -7   2 20.7149  4.8671   2
  12   7   2 22.1356  4.8474   4
 -12   7  -2 17.6291  3.8736   5
 -12   7  -2 12.6024  3.4301   3
  12   7   2 24.8871  4.7602   2
 -13  -7  -2 3.94660 3.06095   5
 -13  -7  -2 -1.8288  2.6034   3
  13  -7   2 -0.6785  3.1356   2
  13  -7   2 -2.3681  3.3842   6
  13   7   2 6.81789 2.96565   2
 -13   7  -2 1.18255 2.59879   3
  13   7   2 -0.2688  2.6584   4
 -13   7  -2 1.20130 2.07571   5
  14  -7   2 5.26544 3.75027   2
 -14  -7  -2 9.21356 3.85511   5
 -14  -7  -2 9.03622 3.64663   3
  14   7   2 3.68688 3.06213   4
 -14   7  -2 13.6154  3.9866   5
 -15  -7  -2 0.46913 3.24819   3
  15  -7   2 -3.0740  3.9692   2
 -15  -7  -2 3.20617 3.70182   5
 -15   7  -2 0.22043 2.43707   3
  15   7   2 -0.8616  3.1963   4
 -15   7  -2 1.26695 2.81479   5
 -16  -7  -2 6.54146 4.30592   5
  16   7   2 4.68550 3.88311   4
 -15  -8   2 -1.9525  3.4612   5
 -15  -8   2 0.03205 2.76879   3
  15   8  -2 2.18730 3.85056   4
 -15   8   2 0.95987 3.23501   3
 -15   8   2 3.17737 3.47759   5
 -14  -8   2 -0.1662  3.3928   5
 -14  -8   2 -2.7901  2.9845   3
  14  -8  -2 4.88159 3.81408   4
  14  -8  -2 -2.9185  3.0153   2
 -14   8   2 1.79971 2.67223   5
  14   8  -2 0.63151 2.59775   4
 -14   8   2 3.60033 3.19105   3
 -13  -8   2 1.94442 2.53110   3
  13  -8  -2 -3.0711  2.8354   2
 -13  -8   2 2.06317 2.94232   5
  13  -8  -2 2.93159 3.38197   4
 -13   8   2 -1.6441  1.9361   5
  13   8  -2 0.67764 2.37330   4
 -13   8   2 1.24038 2.37459   3
 -12  -8   2 5.48926 2.93042   3
  12  -8  -2 3.61801 3.61282   6
  12  -8  -2 6.01897 3.21751   4
  12  -8  -2 2.07758 2.83753   2
 -12  -8   2 12.0797  3.8370   5
  12   8  -2 9.97045 3.37213   4
 -12   8   2 6.08224 2.75640   3
 -12   8   2 3.47482 2.59468   5
  11  -8  -2 5.97474 2.86993   2
 -11  -8   2 1.93357 2.76464   5
  11  -8  -2 3.08819 2.68391   4
 -11  -8   2 2.17673 2.27371   3
  11  -8  -2 0.66493 2.80032   6
 -11   8   2 -3.4945  1.8260   3
 -11   8   2 1.16903 2.22148   5
 -11   8   2 -0.5652  3.8410   6
  11   8  -2 4.03859 2.75463   4
  10  -8  -2 2.16389 2.88021   4
  10  -8  -2 1.90208 2.28942   6
 -10  -8   2 5.46761 2.75871   5
 -10  -8   2 1.32657 2.03220   3
  10  -8  -2 1.97258 2.26996   2
 -10   8   2 2.71722 2.24842   5
  10   8  -2 1.50341 2.03477   4
 -10   8   2 -0.6887  1.6112   3
 -10   8   2 6.04647 4.36505   6
   9  -8  -2 4.75325 3.00108   4
  -9  -8   2 5.51366 2.55602   3
   9  -8  -2 8.06384 2.95657   2
  -9  -8   2 10.1256  2.8015   5
   9  -8  -2 5.82300 3.34861   6
  -9   8   2 5.50796 4.26595   6
   9   8  -2 6.91796 2.29364   2
  -9   8   2 10.2432  2.7370   5
   9   8  -2 4.48114 2.35499   4
  -9   8   2 2.36501 1.81220   3
  -8  -8   2 1.91695 1.63809   3
   8  -8  -2 -0.9371  2.0875   4
  -8  -8   2 -1.0580  1.5068   5
   8  -8  -2 2.10554 2.04941   2
   8  -8  -2 0.90319 2.24854   6
  -8   8   2 0.76631 1.56545   5
  -8   8   2 0.52800 1.53125   3
   8   8  -2 0.61980 1.71167   4
   8   8  -2 2.55621 1.68690   2
  -8   8   2 0.92814 1.92293   2
  -8   8   2 2.35405 3.56804   6
  -7  -8   2 21.2154  3.4267   5
   7  -8  -2 14.2686  3.9961   6
   7  -8  -2 14.9293  3.0685   2
  -7  -8   2 16.0720  2.9987   3
   7  -8  -2 16.3972  3.2017   4
  -7   8   2 18.2548  5.2024   6
  -7   8   2 12.8243  2.6638   5
  -7   8   2 22.0062  3.9155   2
   7   8  -2 13.3928  3.6355   6
   7   8  -2 14.0254  3.2494   4
   7   8  -2 18.6199  3.0853   2
  -7   8   2 13.6152  2.7456   3
  -6  -8   2 2.79233 1.73994   5
   6  -8  -2 6.75151 3.04271   6
  -6  -8   2 2.82404 1.81496   3
   6  -8  -2 9.44577 2.47995   2
   6  -8  -2 4.73246 2.29246   4
  -6   8   2 7.47698 2.32112   2
   6   8  -2 6.03446 1.99559   4
  -6   8   2 8.31448 2.04477   3
   6   8  -2 2.07255 2.44257   6
  -6   8   2 3.63594 1.47555   5
   6   8  -2 8.48723 2.02096   2
  -6   8   2 1.62934 2.89313   6
   5  -8  -2 14.1102  2.8435   4
   5  -8  -2 13.1781  2.7915   2
  -5  -8   2 14.9049  2.5622   3
   5  -8  -2 11.0207  3.5183   6
  -5  -8   2 14.9051  2.6979   5
   5   8  -2 12.2105  2.3390   2
  -5   8   2 15.0917  2.3496   3
   5   8  -2 13.4562  3.6211   6
  -5   8   2 15.7685  2.4249   5
  -5   8   2 10.9102  4.3146   6
   5   8  -2 14.9868  2.9424   4
  -5   8   2 12.7041  2.7216   2
  -4  -8   2 8.23457 1.47948   1
   4  -8  -2 7.68122 2.14129   2
   4  -8  -2 6.83439 2.68187   6
   4  -8  -2 6.32869 1.87902   4
  -4  -8   2 7.52028 1.90126   3
  -4  -8   2 11.6781  2.2139   5
  -4   8   2 9.90141 1.81014   3
  -4   8   2 9.74985 1.76815   5
   4   8  -2 7.40276 3.00249   6
  -4   8   2 10.1088  3.6737   6
   4   8  -2 7.89111 2.02593   4
   4   8  -2 8.15429 1.95794   2
  -4   8   2 6.69231 1.98111   2
  -3  -8   2 2.22264 1.03273   1
   3  -8  -2 3.16363 1.38723   4
  -3  -8   2 1.41636 1.20190   5
  -3  -8   2 1.63927 1.20167   3
   3  -8  -2 2.87925 1.65047   2
   3   8  -2 3.98473 2.81222   6
  -3   8   2 4.05876 3.74179   6
   3   8  -2 1.62650 0.88396   3
   3   8  -2 1.84982 0.98979   5
  -3   8   2 1.85559 1.28187   2
  -3   8   2 1.32910 0.86718   5
   3   8  -2 2.60176 1.24522   2
   3   8  -2 3.11894 1.47457   4
  -3   8   2 2.21725 0.93318   3
  -2  -8   2 13.5168  2.2030   3
  -2  -8   2 11.8710  2.2008   5
   2  -8  -2 15.5116  2.5742   4
   2   8  -2 15.1738  2.1262   3
   2   8  -2 7.90490 3.45614   6
  -2   8   2 11.2186  4.2939   6
   2   8  -2 10.2195  2.2995   4
   2   8  -2 12.7321  1.9959   5
  -2   8   2 9.29706 2.23046   2
   2   8  -2 14.4086  2.3114   2
  -2   8   2 12.8146  1.6331   5
  -2   8   2 17.3812  1.8688   3
  -1  -8   2 6.74243 1.65450   3
  -1  -8   2 5.91337 1.58258   5
   1  -8  -2 6.22859 1.74258   4
  -1   8   2 6.14199 1.00888   5
  -1   8   2 5.21123 3.30764   6
  -1   8   2 5.43033 1.69258   2
   1   8  -2 5.65854 1.33530   3
   1   8  -2 8.19705 1.77985   2
   1   8  -2 10.1317  3.5145   6
   1   8  -2 6.95563 1.48934   5
   0  -8  -2 1.12220 0.70465   5
   0  -8  -2 0.58505 0.66066   3
   0  -8   2 -0.5626  0.9445   4
   0  -8  -2 0.12423 1.12618   4
   0   8   2 -0.1828  0.4644   5
   0   8   2 0.86398 0.53078   3
   0   8  -2 0.40505 0.92896   2
   0   8  -2 -1.3120  2.5096   6
   0   8  -2 -0.0283  0.7557   3
   0   8   2 -0.2051  0.9788   2
   0   8   2 0.71230 2.91027   6
   0   8  -2 1.10494 0.80855   5
   1  -8   2 14.6470  2.4280   4
   1  -8   2 13.7203  2.5368   2
  -1  -8  -2 12.9126  1.4768   5
  -1  -8  -2 13.3968  2.6078   4
  -1  -8  -2 12.2254  1.4094   3
   1  -8   2 11.3142  3.0377   6
   1   8   2 10.5380  4.0963   6
   1   8   2 15.8745  2.6678   2
  -1   8  -2 11.3129  1.9341   5
   1   8   2 14.0975  1.4020   5
  -1   8  -2 13.7240  2.4117   2
  -1   8  -2 14.8088  2.0449   3
  -1   8  -2 14.1107  4.4089   6
   1   8   2 14.2284  1.3852   3
   2  -8   2 23.9247  4.7259   6
   2  -8   2 38.0522  3.8111   4
  -2  -8  -2 29.4537  2.4384   3
   2  -8   2 33.5389  4.0269   2
  -2  -8  -2 29.0476  2.4717   5
  -2   8  -2 36.0195  3.5733   5
   2   8   2 25.7003  5.6408   6
   2   8   2 30.4172  3.9526   2
  -2   8  -2 34.1463  5.8629   6
  -2   8  -2 32.8448  3.9740   2
  -2   8  -2 28.2665  3.2388   3
  -3  -8  -2 33.2001  2.8544   5
   3  -8   2 28.8009  4.0357   2
   3  -8   2 31.7899  3.6323   4
   3  -8   2 32.1443  5.5669   6
  -3  -8  -2 33.0422  2.7650   3
   3   8   2 33.0893  6.1887   6
   3   8   2 37.3234  4.4421   2
  -3   8  -2 35.5747  3.7218   5
  -3   8  -2 27.8457  5.8451   6
  -3   8  -2 40.2866  4.5561   2
  -3   8  -2 32.1037  3.5914   3
  -4  -8  -2 1.80792 1.00084   5
   4  -8   2 0.37963 1.62905   6
   4  -8   2 0.27572 1.24899   2
  -4  -8  -2 1.80701 0.98155   3
   4  -8   2 1.67440 1.20569   4
  -4   8  -2 3.44910 2.94801   6
  -4   8  -2 1.83124 1.21486   5
   4   8   2 3.79058 1.59035   2
  -4   8  -2 2.59708 1.59929   2
   4   8   2 1.98029 1.55629   4
   4   8   2 3.67172 3.54357   6
  -4   8  -2 1.58676 1.05961   3
  -5  -8  -2 0.35035 1.01824   5
  -5  -8  -2 -0.0162  0.9790   3
   5  -8   2 0.48483 1.16115   4
   5  -8   2 -0.7097  1.4483   6
   5  -8   2 0.21047 1.25867   2
  -5   8  -2 -0.5782  3.0197   6
   5   8   2 0.62175 3.06363   6
   5   8   2 0.47601 1.32143   4
  -5   8  -2 -0.5172  1.1334   2
   5   8   2 -1.0373  1.1388   2
  -5   8  -2 0.49031 1.13038   5
  -5   8  -2 1.11036 1.22224   3
  -6  -8  -2 -0.0935  1.1129   5
   6  -8   2 -0.1612  1.6954   6
  -6  -8  -2 2.03518 1.26134   3
   6  -8   2 -0.2269  1.4254   2
   6  -8   2 0.61889 1.45726   4
   6   8   2 -0.1080  2.8738   6
  -6   8  -2 3.53846 1.78569   2
  -6   8  -2 2.45394 1.56985   3
  -6   8  -2 1.05352 1.43326   5
   6   8   2 2.81352 1.76627   2
  -6   8  -2 3.91612 3.09544   6
   6   8   2 1.38452 1.46346   4
   7  -8   2 1.15508 1.97262   6
   7  -8   2 2.34352 1.82207   2
  -7  -8  -2 5.56246 1.98233   5
  -7  -8  -2 5.33268 1.67952   3
   7  -8   2 2.28009 1.70788   4
  -7   8  -2 1.10030 3.05362   6
  -7   8  -2 2.04846 1.79922   2
   7   8   2 3.78064 1.85424   4
  -7   8  -2 0.92079 1.40503   3
   7   8   2 2.15814 1.76072   2
  -7   8  -2 2.49468 1.62960   5
   7   8   2 1.60363 3.10855   6
   8  -8   2 3.27035 1.97946   2
   8  -8   2 0.37340 1.90368   4
   8  -8   2 3.85542 2.91387   6
  -8  -8  -2 3.68977 1.78798   5
  -8  -8  -2 1.89185 1.68873   3
   8   8   2 -0.0773  2.8853   6
  -8   8  -2 2.10450 3.44603   6
   8   8   2 0.36910 1.49170   2
  -8   8  -2 2.06075 1.79989   3
   8   8   2 2.58334 1.98832   4
  -8   8  -2 1.51346 1.77616   5
  -9  -8  -2 19.1997  3.5026   5
   9  -8   2 20.3093  5.0371   6
   9  -8   2 20.7262  3.7814   4
  -9  -8  -2 18.9877  3.3250   3
   9  -8   2 21.0349  4.2317   2
   9   8   2 13.4077  3.4472   2
   9   8   2 21.1587  5.1538   6
  -9   8  -2 11.9434  5.4584   6
   9   8   2 18.9655  3.9420   4
  -9   8  -2 21.3268  3.7836   5
  -9   8  -2 18.4808  3.4862   3
  10  -8   2 1.08859 2.13293   2
 -10  -8  -2 0.01764 2.13305   5
 -10  -8  -2 5.41187 2.30505   3
  10  -8   2 3.43028 3.34588   6
  10   8   2 0.70304 2.31257   4
  10   8   2 2.68243 2.14594   2
 -10   8  -2 3.29121 1.99592   3
  10   8   2 1.56322 3.02442   6
 -10   8  -2 -0.1161  1.7723   5
 -11  -8  -2 10.9007  3.2282   5
 -11  -8  -2 6.94821 2.83027   3
  11  -8   2 7.53122 3.87830   6
  11  -8   2 8.62122 3.61117   2
 -11   8  -2 1.29878 2.31442   3
  11   8   2 13.9438  3.3874   2
 -11   8  -2 5.24569 2.46948   5
  11   8   2 7.64757 3.23196   4
  12  -8   2 -1.3117  2.5824   6
 -12  -8  -2 -1.2381  2.2870   3
  12  -8   2 1.22416 3.05114   2
 -12  -8  -2 4.75551 2.87471   5
 -12   8  -2 1.06374 1.95253   5
 -12   8  -2 -0.5905  1.6824   3
  12   8   2 2.55743 2.39071   2
  12   8   2 -0.4139  2.1006   4
  13  -8   2 -1.2296  3.0913   2
 -13  -8  -2 3.38812 3.11269   5
 -13  -8  -2 0.45622 2.40444   3
 -13   8  -2 -2.2491  2.2121   3
 -13   8  -2 3.40647 2.33112   5
  13   8   2 2.07753 2.73977   4
  13   8   2 2.95647 2.59435   2
  14  -8   2 -0.1370  3.6135   2
 -14  -8  -2 5.22076 3.61661   5
  14   8   2 2.95609 3.69615   4
 -14   8  -2 -0.4116  2.6592   3
 -14   8  -2 5.72408 3.20057   5
  15  -8   2 -5.1263  3.5394   2
 -15   8  -2 2.08036 2.95232   5
  15   8   2 4.53822 3.50751   4
 -15   8  -2 1.95440 3.25509   3
  16   8   2 -1.1050  3.6945   4
 -15  -9   2 8.09402 4.72903   5
 -15  -9   2 15.9271  4.9800   3
  15   9  -2 12.6301  4.7219   4
 -15   9   2 3.23944 3.60603   5
 -15   9   2 5.70862 3.78307   3
  14  -9  -2 -2.2810  3.1920   2
 -14  -9   2 -1.3053  2.5555   3
 -14  -9   2 1.78975 3.48054   5
  14   9  -2 -1.2680  2.7915   4
 -14   9   2 -1.9254  3.1222   5
 -14   9   2 2.01226 3.02837   3
  13  -9  -2 14.0259  4.1498   4
 -13  -9   2 13.1964  4.2270   5
  13  -9  -2 7.52620 3.82146   2
 -13  -9   2 10.9246  3.9056   3
 -13   9   2 8.82771 3.55915   3
 -13   9   2 9.17062 3.75909   5
  13   9  -2 7.97289 3.73192   4
 -12  -9   2 11.8554  3.6149   5
  12  -9  -2 6.36526 3.93581   6
 -12  -9   2 4.44726 3.15637   3
  12  -9  -2 11.7916  3.8071   4
  12  -9  -2 6.57902 3.57944   2
 -12   9   2 14.6251  3.8387   5
  12   9  -2 8.87125 3.76119   4
 -12   9   2 11.4456  3.5901   3
  11  -9  -2 12.1933  3.8523   4
  11  -9  -2 12.7207  4.5052   6
 -11  -9   2 15.1523  3.8708   3
 -11  -9   2 20.9272  4.2633   5
  11  -9  -2 13.3515  4.1712   2
 -11   9   2 9.89407 3.36495   3
  11   9  -2 20.3043  4.4424   4
 -11   9   2 13.7605  3.5744   5
 -11   9   2 5.72281 4.77755   6
  10  -9  -2 7.69271 3.09862   2
  10  -9  -2 5.05827 3.19658   4
 -10  -9   2 3.15503 2.30880   3
 -10  -9   2 6.14857 2.95013   5
  10  -9  -2 6.66074 3.74488   6
 -10   9   2 4.67216 2.51528   3
 -10   9   2 5.87422 2.67136   5
  10   9  -2 7.43271 2.76601   4
 -10   9   2 0.65752 3.38785   6
   9  -9  -2 8.73982 3.60861   6
  -9  -9   2 5.16920 2.66043   5
  -9  -9   2 4.29909 2.55406   3
   9  -9  -2 14.1586  3.5018   2
   9  -9  -2 12.2667  3.6058   4
  -9   9   2 10.1635  3.2006   2
  -9   9   2 13.1492  2.9694   5
  -9   9   2 7.64378 2.55624   3
   9   9  -2 12.7363  3.3814   4
  -9   9   2 6.74856 4.58921   6
   8  -9  -2 -0.1467  1.6517   2
  -8  -9   2 1.69416 1.81439   5
   8  -9  -2 1.82360 2.59557   6
   8  -9  -2 -1.4956  2.0593   4
  -8  -9   2 3.91061 2.10491   3
  -8   9   2 2.08494 2.13362   2
  -8   9   2 6.82991 4.44470   6
   8   9  -2 2.65260 1.81266   2
   8   9  -2 5.33761 2.25660   4
  -8   9   2 2.96995 1.97188   5
  -8   9   2 4.00432 2.04345   3
   7  -9  -2 80.0397  8.0039   2
   7  -9  -2 82.6912 11.4486   6
  -7  -9   2 80.3984  7.4987   5
   7  -9  -2 91.6842  7.8850   4
  -7  -9   2 88.0674  7.4177   3
  -7   9   2 98.5842  7.3648   3
  -7   9   2 86.8827  8.2589   2
   7   9  -2 105.306   8.186   4
   7   9  -2 92.4770 10.9792   6
   7   9  -2 92.0109  7.6658   2
  -7   9   2 99.3673 12.5680   6
  -7   9   2 85.7070  7.2720   5
  -6  -9   2 0.18372 1.59872   5
   6  -9  -2 0.52592 1.70332   6
   6  -9  -2 1.98785 1.93257   4
  -6  -9   2 0.90848 1.50273   3
   6  -9  -2 1.10587 1.61013   2
   6   9  -2 3.63590 3.05391   6
  -6   9   2 0.54559 1.37517   5
  -6   9   2 2.09211 1.34161   3
  -6   9   2 4.46313 2.13933   2
   6   9  -2 0.63838 1.33571   2
  -6   9   2 0.78432 2.79043   6
   6   9  -2 -0.3001  1.3751   4
   5  -9  -2 194.734  16.070   4
  -5  -9   2 213.589  15.636   3
   5  -9  -2 226.321  17.229   2
  -5  -9   2 238.172  16.019   5
   5  -9  -2 247.199  24.668   6
   5   9  -2 232.192  23.518   6
  -5   9   2 231.137  15.440   3
  -5   9   2 222.393  15.562   5
  -5   9   2 254.112  24.825   6
   5   9  -2 232.205  16.705   2
  -5   9   2 237.345  17.354   2
   5   9  -2 247.959  16.678   4
   4  -9  -2 -0.7893  1.3532   6
  -4  -9   2 0.18631 1.23344   5
  -4  -9   2 -2.5979  1.0122   3
   4  -9  -2 1.58960 1.50852   4
   4  -9  -2 0.75825 1.31150   2
  -4  -9   2 0.02152 0.88476   1
   4   9  -2 -0.2247  1.1084   4
   4   9  -2 1.40207 2.78016   6
  -4   9   2 -0.1697  0.8690   3
  -4   9   2 -0.7022  0.8938   5
   4   9  -2 -0.2291  1.0615   2
  -4   9   2 -1.1582  0.8747   2
  -4   9   2 -2.8527  2.3689   6
  -3  -9   2 136.752   9.841   3
   3  -9  -2 143.363  10.407   4
  -3  -9   2 151.181  10.121   5
   3  -9  -2 139.668  11.054   2
  -3   9   2 139.209   9.504   5
  -3   9   2 118.103  15.487   6
   3   9  -2 135.910   9.745   5
  -3   9   2 136.430   9.405   3
   3   9  -2 143.723  10.504   4
   3   9  -2 138.080   9.629   3
  -3   9   2 155.030  11.134   2
   3   9  -2 137.242  15.120   6
   3   9  -2 123.588  10.393   2
   2  -9  -2 8.20461 2.15452   4
  -2  -9   2 16.1563  2.4507   5
  -2  -9   2 9.00718 1.96684   3
   2   9  -2 6.75245 1.59814   3
  -2   9   2 11.1404  3.9578   6
  -2   9   2 7.63438 2.15403   2
   2   9  -2 9.46622 1.82229   5
   2   9  -2 11.4106  2.3758   4
   2   9  -2 6.62951 3.15942   6
  -2   9   2 12.0780  1.6108   5
   2   9  -2 10.2254  2.2823   2
  -2   9   2 11.4571  1.6753   3
  -1  -9   2 88.9149  6.6482   3
   1  -9  -2 91.3506  7.1588   4
  -1  -9   2 90.8797  6.7964   5
   1   9  -2 75.5235  6.3551   5
  -1   9   2 81.7791  5.8652   3
   1   9  -2 81.9175  6.3514   3
  -1   9   2 98.6065  7.5549   2
  -1   9   2 81.4596 10.9658   6
   1   9  -2 84.0697  7.1472   2
   1   9  -2 96.6771 10.9070   6
  -1   9   2 89.0578  5.9781   5
   0  -9  -2 47.6865  5.2993   4
   0  -9   2 48.8100  5.0963   4
   0  -9  -2 46.6733  3.5024   3
   0  -9  -2 46.7053  3.5364   5
   0   9   2 52.0710  5.5414   2
   0   9  -2 49.1911  4.0149   5
   0   9  -2 52.1035  5.3788   2
   0   9  -2 32.6071  6.7938   6
   0   9   2 45.0713  3.3548   3
   0   9   2 44.7964  3.3613   5
   0   9   2 49.3158  7.5651   6
   0   9  -2 44.8789  3.8884   3
   1  -9   2 124.509  13.640   6
  -1  -9  -2 119.645   7.804   3
  -1  -9  -2 115.561   9.298   4
   1  -9   2 122.951   9.007   4
  -1  -9  -2 113.862   7.882   5
   1  -9   2 124.944   9.525   2
   1   9   2 103.335  13.672   6
  -1   9  -2 116.089   9.361   2
   1   9   2 117.837   9.471   2
   1   9   2 114.720   7.805   5
  -1   9  -2 124.717  13.778   6
   1   9   2 118.700   7.714   3
  -1   9  -2 121.578   8.558   5
  -1   9  -2 125.743   8.476   3
   2  -9   2 44.8517  4.9761   2
   2  -9   2 35.7844  4.1086   4
  -2  -9  -2 41.9859  4.9969   4
   2  -9   2 36.0878  6.1092   6
  -2  -9  -2 37.6304  2.9747   3
  -2  -9  -2 33.9807  2.9931   5
   2   9   2 39.0675  4.7602   2
   2   9   2 39.3689  7.1536   6
  -2   9  -2 39.4021  4.0409   5
  -2   9  -2 42.3855  4.1055   3
  -2   9  -2 41.7591  4.8180   2
  -2   9  -2 40.0966  6.6251   6
   3  -9   2 324.739  32.718   6
  -3  -9  -2 308.724  20.586   3
   3  -9   2 346.226  23.337   2
   3  -9   2 333.264  21.932   4
  -3  -9  -2 327.388  20.948   5
  -3   9  -2 325.345  21.263   3
  -3   9  -2 311.486  32.714   6
  -3   9  -2 315.057  23.157   2
   3   9   2 332.037  23.134   2
  -3   9  -2 321.476  21.521   5
   3   9   2 330.835  32.880   6
  -4  -9  -2 21.3987  2.5410   3
   4  -9   2 14.3581  4.0544   6
   4  -9   2 21.5537  3.5187   2
   4  -9   2 27.4257  3.3732   4
  -4  -9  -2 23.7206  2.6514   5
  -4   9  -2 19.0758  4.8925   6
  -4   9  -2 19.3154  2.9810   3
   4   9   2 24.8637  3.8016   2
   4   9   2 21.8264  5.0772   6
   4   9   2 22.3292  3.5887   4
  -4   9  -2 28.4200  3.4214   5
  -4   9  -2 28.2022  4.0284   2
  -5  -9  -2 142.685  10.669   3
   5  -9   2 153.698  17.462   6
  -5  -9  -2 152.363  10.924   5
   5  -9   2 160.869  12.483   2
   5  -9   2 162.812  11.504   4
  -5   9  -2 161.774  18.118   6
  -5   9  -2 158.049  11.266   3
   5   9   2 148.747  11.953   4
   5   9   2 168.891  17.897   6
  -5   9  -2 175.499  12.769   2
  -5   9  -2 165.618  11.435   5
   5   9   2 157.277  12.251   2
   6  -9   2 8.08301 3.30760   6
  -6  -9  -2 13.9057  2.3916   5
  -6  -9  -2 10.5596  2.1434   3
   6  -9   2 14.6486  2.7159   4
   6  -9   2 10.6924  2.7932   2
  -6   9  -2 15.9821  2.9226   3
   6   9   2 11.8481  4.4336   6
  -6   9  -2 17.8446  2.8843   5
   6   9   2 11.0363  2.8351   4
   6   9   2 13.6251  2.9267   2
  -6   9  -2 17.0718  3.4416   2
  -6   9  -2 10.5567  4.6249   6
   7  -9   2 49.6363  5.9730   2
  -7  -9  -2 36.9997  4.4926   5
  -7  -9  -2 34.4914  4.2318   3
   7  -9   2 34.5853  6.7562   6
   7  -9   2 42.0889  4.9255   4
   7   9   2 24.7799  6.3526   6
  -7   9  -2 47.4975  5.2501   5
  -7   9  -2 36.4749  4.7022   3
  -7   9  -2 39.4715  5.5519   2
   7   9   2 51.4066  6.0276   2
   7   9   2 46.3961  5.7126   4
  -7   9  -2 46.3238  8.1150   6
   8  -9   2 0.67327 2.08546   2
  -8  -9  -2 0.66820 1.57554   5
   8  -9   2 1.92899 2.25130   6
  -8  -9  -2 -0.6397  1.4240   3
   8  -9   2 -0.7618  1.9379   4
  -8   9  -2 2.48058 1.80401   5
   8   9   2 0.70403 1.96726   4
  -8   9  -2 -1.3222  1.5327   3
  -8   9  -2 2.72438 3.32774   6
   8   9   2 0.07525 3.14987   6
   8   9   2 -0.5120  1.5793   2
   9  -9   2 15.5275  3.7647   2
   9  -9   2 12.6828  4.4242   6
   9  -9   2 16.3966  3.5848   4
  -9  -9  -2 19.4899  3.5505   5
   9   9   2 16.3230  3.8202   2
   9   9   2 18.6751  5.1745   6
  -9   9  -2 16.8658  3.4996   5
  -9   9  -2 14.9958  5.4929   6
  -9   9  -2 12.2797  3.1954   3
   9   9   2 22.3710  4.2964   4
  10  -9   2 -0.5169  2.3264   6
 -10  -9  -2 -0.9102  2.1179   5
  10  -9   2 2.96969 2.90668   2
 -10   9  -2 -0.1802  1.9342   5
  10   9   2 1.87523 2.16291   4
  10   9   2 0.33196 1.62403   2
  10   9   2 2.55058 3.28010   6
 -10   9  -2 1.84137 2.24872   3
  11  -9   2 17.9595  5.5774   6
  11  -9   2 17.9948  4.2582   2
 -11   9  -2 23.7733  4.5288   5
  11   9   2 17.1893  4.0495   4
 -11   9  -2 14.4714  3.7895   3
  11   9   2 17.6896  4.1897   2
  12  -9   2 5.57399 3.43225   2
  12  -9   2 7.77205 4.23669   6
 -12   9  -2 13.3150  3.6273   5
  12   9   2 9.69156 3.76816   4
 -12   9  -2 18.4904  3.8301   3
  12   9   2 9.08015 3.22652   2
  13  -9   2 13.6271  4.1263   2
  13  -9   2 18.1602  5.5389   6
 -13   9  -2 9.62141 3.29632   3
  13   9   2 12.2788  3.7097   2
 -13   9  -2 11.4918  3.4867   5
  13   9   2 16.9916  4.6985   4
  14  -9   2 2.80916 3.31547   2
 -14   9  -2 -0.8762  2.5999   5
 -14   9  -2 -0.6117  2.5645   3
  14   9   2 4.24616 3.58861   4
  15  -9   2 -0.1993  3.3597   2
  15   9   2 3.16800 3.39039   4
 -15   9  -2 4.18278 3.30946   5
 -15   9  -2 6.77742 3.46083   3
 -15 -10   2 3.02363 4.51493   5
 -15  10   2 1.17440 3.44347   3
 -15  10   2 -1.3100  3.4048   5
  14 -10  -2 1.62551 3.46806   2
 -14 -10   2 3.72196 3.46732   5
 -14  10   2 1.15106 3.08333   5
  14  10  -2 1.95076 3.69017   4
 -14  10   2 2.26420 3.36495   3
 -13 -10   2 7.47270 3.91113   5
  13 -10  -2 -1.5983  3.2753   6
  13 -10  -2 -0.6675  3.0937   2
 -13 -10   2 2.50495 2.83401   3
  13 -10  -2 -0.7748  3.4035   4
  13  10  -2 1.09730 2.43938   4
 -13  10   2 -1.3657  2.0398   3
 -13  10   2 4.97261 2.59665   5
  12 -10  -2 -1.4310  2.2613   2
  12 -10  -2 -1.3239  2.5091   6
  12 -10  -2 -4.1972  2.7918   4
 -12 -10   2 0.44002 2.56797   3
 -12 -10   2 0.66791 2.88373   5
 -12  10   2 -2.1586  2.2238   3
  12  10  -2 0.20885 2.29681   4
 -12  10   2 4.32106 3.00952   5
 -11 -10   2 1.38220 2.51600   3
  11 -10  -2 -5.1113  2.4923   4
  11 -10  -2 -3.0984  2.3091   2
  11 -10  -2 -2.8705  2.3034   6
 -11 -10   2 1.17960 2.89586   5
 -11  10   2 -3.3876  2.0208   3
 -11  10   2 1.79203 3.80432   6
 -11  10   2 2.96985 2.55160   5
  11  10  -2 1.59917 2.72565   4
  10 -10  -2 1.35556 2.27739   2
 -10 -10   2 1.29921 2.50550   3
  10 -10  -2 3.27033 3.15334   4
 -10 -10   2 1.28157 2.46446   5
  10 -10  -2 -1.4300  2.3131   6
 -10  10   2 1.71058 2.20892   5
 -10  10   2 1.27785 1.95763   3
 -10  10   2 -1.3525  3.1552   6
  10  10  -2 0.27636 2.06577   4
   9 -10  -2 4.35929 2.94988   6
   9 -10  -2 6.22743 2.90371   4
  -9 -10   2 7.13314 2.86299   5
   9 -10  -2 5.44551 2.86797   2
  -9 -10   2 3.26300 2.34157   3
  -9  10   2 3.88370 2.11692   5
   9  10  -2 -0.4023  1.7671   4
  -9  10   2 3.70064 2.70214   2
  -9  10   2 7.87391 2.50812   3
  -9  10   2 -0.0765  3.7711   6
   8 -10  -2 8.17359 3.74422   6
  -8 -10   2 15.9594  3.2382   3
  -8 -10   2 5.93664 2.74661   5
   8 -10  -2 3.76437 2.60373   4
   8 -10  -2 6.99169 2.60120   2
  -8  10   2 5.88549 4.23140   6
   8  10  -2 3.88038 2.32332   4
   8  10  -2 8.22026 2.43510   2
  -8  10   2 7.69033 2.38951   5
  -8  10   2 7.82401 2.47526   3
  -8  10   2 6.33443 3.08283   2
  -7 -10   2 7.41031 2.51933   5
   7 -10  -2 8.58566 3.67747   6
  -7 -10   2 13.5471  2.9030   3
   7 -10  -2 6.94270 2.47732   4
   7 -10  -2 7.41155 2.67330   2
  -7  10   2 16.9757  3.8543   2
   7  10  -2 11.6534  2.8990   4
   7  10  -2 13.4120  2.8592   2
  -7  10   2 11.5117  4.2413   6
  -7  10   2 10.7275  2.6085   5
  -7  10   2 7.83047 2.33851   3
  -6 -10   2 2.65007 1.75067   3
   6 -10  -2 5.88046 2.24028   2
  -6 -10   2 0.90070 1.63258   5
   6 -10  -2 3.71624 2.15132   4
   6 -10  -2 0.77088 2.14160   6
  -6  10   2 -0.4401  2.7512   6
   6  10  -2 5.09227 2.12849   4
  -6  10   2 2.53175 1.60671   3
  -6  10   2 1.31977 1.74621   2
   6  10  -2 2.40147 1.61949   2
  -6  10   2 1.10414 1.38466   5
   6  10  -2 1.64704 2.51356   6
   5 -10  -2 -0.1954  1.6134   6
  -5 -10   2 0.52304 1.43715   5
   5 -10  -2 2.97921 2.03918   4
   5 -10  -2 1.21228 1.72447   2
  -5 -10   2 0.16891 1.42832   3
   5  10  -2 -0.4839  2.4139   6
  -5  10   2 -2.2327  2.3118   6
   5  10  -2 1.43249 1.44210   2
  -5  10   2 1.50059 1.25579   3
  -5  10   2 1.72336 1.37976   5
   5  10  -2 1.20419 1.36801   4
  -5  10   2 0.35958 1.55847   2
  -4 -10   2 12.7407  2.5163   5
   4 -10  -2 15.6645  4.2722   6
  -4 -10   2 14.0351  2.5550   3
   4 -10  -2 16.3112  3.0697   4
   4 -10  -2 12.1220  2.9571   2
  -4  10   2 8.99292 4.31907   6
   4  10  -2 11.6543  2.7949   4
  -4  10   2 12.2921  2.2398   3
  -4  10   2 18.4725  2.4760   5
   4  10  -2 17.2277  3.0485   2
   4  10  -2 12.5134  4.0143   6
  -4  10   2 18.5926  3.4576   2
  -3 -10   2 11.3573  2.3543   3
   3 -10  -2 14.2468  2.8451   4
  -3 -10   2 14.0626  2.5671   5
   3 -10  -2 8.35395 2.62386   2
   3  10  -2 13.5570  3.9123   6
  -3  10   2 12.6085  1.9622   3
  -3  10   2 11.0875  1.8465   5
   3  10  -2 11.1948  2.0682   3
   3  10  -2 9.54274 2.67245   4
   3  10  -2 7.33838 2.15754   2
   3  10  -2 14.8915  2.2742   5
  -3  10   2 11.5434  4.0982   6
  -3  10   2 10.6205  2.7873   2
  -2 -10   2 57.1919  4.5937   3
   2 -10  -2 47.5102  5.4738   4
  -2 -10   2 49.9670  5.1737   5
   2  10  -2 43.3667  7.2089   6
   2  10  -2 49.4198  5.4896   2
  -2  10   2 39.1390  7.6825   6
   2  10  -2 48.5296  4.2267   5
  -2  10   2 50.2406  3.8847   3
   2  10  -2 48.4444  4.2153   3
  -2  10   2 55.0852  6.1250   2
  -1 -10   2 7.96086 1.96566   3
   1 -10  -2 9.82645 2.37282   4
  -1 -10   2 10.4958  2.2394   5
   1  10  -2 6.73112 3.26779   6
   1  10  -2 11.7614  2.0026   3
  -1  10   2 6.78449 2.16876   2
  -1  10   2 4.87973 3.25116   6
   1  10  -2 6.93336 1.74907   5
   1  10  -2 4.46350 1.76833   2
   0 -10   2 0.59431 1.35342   3
   0 -10   2 0.73490 1.27455   5
   0 -10   2 2.91740 1.60991   4
   0 -10  -2 -0.0511  1.3531   4
   0  10  -2 1.74462 1.07377   5
   0  10  -2 1.68640 2.81741   6
   0  10   2 -0.3957  1.1654   2
   0  10  -2 0.03260 1.22597   2
   0  10   2 0.79395 3.31281   6
   0  10  -2 2.34335 1.08734   3
   1 -10   2 -0.1398  1.3919   4
   1 -10   2 -0.2838  1.8756   6
  -1 -10  -2 0.09895 1.36837   4
   1 -10   2 0.07802 1.25441   2
  -1  10  -2 -0.6547  1.2413   2
  -1  10  -2 -0.0850  2.4979   6
  -1  10  -2 -0.1109  0.8571   5
  -1  10  -2 -0.2790  0.8687   3
   1  10   2 0.65666 3.02091   6
   1  10   2 0.48743 1.10529   2
   2 -10   2 -1.6658  1.1925   4
   2 -10   2 1.18246 1.36700   2
  -2 -10  -2 3.03152 1.80684   4
   2 -10   2 0.18944 1.47056   6
  -2  10  -2 0.36028 1.12052   5
  -2  10  -2 0.23633 1.11172   2
  -2  10  -2 -1.0626  0.7985   3
   2  10   2 -0.9040  2.7160   6
  -2  10  -2 1.22865 3.18452   6
   2  10   2 -0.7571  1.2290   2
   3 -10   2 2.19571 2.12737   6
   3 -10   2 7.80362 2.36364   2
   3 -10   2 5.24179 1.83091   4
   3  10   2 6.62138 2.33257   2
   3  10   2 7.17272 3.58491   6
  -3  10  -2 7.35697 3.51537   6
  -3  10  -2 6.30052 1.76952   3
  -3  10  -2 7.75855 2.30939   2
  -3  10  -2 5.58884 1.70560   5
   4 -10   2 12.6174  2.9088   2
   4 -10   2 12.5493  3.6843   6
   4 -10   2 16.2341  2.7131   4
  -4  10  -2 10.0229  2.6311   2
   4  10   2 10.6117  2.6489   2
  -4  10  -2 13.2101  2.5559   3
  -4  10  -2 5.47979 1.99808   5
   4  10   2 10.7223  3.9975   6
  -4  10  -2 15.7387  4.7029   6
   5 -10   2 1.30753 1.70490   4
   5 -10   2 0.90137 2.30168   6
   5 -10   2 0.60296 1.87487   2
   5  10   2 1.35565 3.29402   6
  -5  10  -2 3.81067 1.66374   3
  -5  10  -2 1.63681 2.89155   6
   5  10   2 2.51544 1.78154   4
  -5  10  -2 0.54594 1.29777   5
  -5  10  -2 1.25138 1.44664   2
   5  10   2 0.79507 1.36619   2
   6 -10   2 59.5543  9.6118   6
   6 -10   2 68.5445  5.8892   4
   6 -10   2 61.2365  7.1418   2
  -6  10  -2 70.1355  6.6872   3
   6  10   2 72.2807  7.5601   2
  -6  10  -2 79.7659  8.0271   2
   6  10   2 63.9757  7.2666   4
   6  10   2 57.9388  9.5198   6
  -6  10  -2 66.2117  5.8515   5
  -6  10  -2 45.8804  9.2516   6
   7 -10   2 0.62940 2.11584   6
   7 -10   2 1.22081 1.81557   2
   7 -10   2 2.92186 1.97563   4
  -7  10  -2 1.64028 3.36013   6
  -7  10  -2 2.52707 1.98330   3
  -7  10  -2 3.93160 2.47020   2
  -7  10  -2 3.78968 1.74654   5
   7  10   2 6.45392 3.64760   6
   7  10   2 -1.3036  1.6169   2
   7  10   2 0.89823 1.81847   4
   8 -10   2 -1.9872  1.8119   4
   8 -10   2 1.47062 2.26162   6
   8 -10   2 0.82479 1.95550   2
   8  10   2 4.69887 2.26856   2
   8  10   2 2.81390 1.95449   4
  -8  10  -2 2.35949 1.82493   3
  -8  10  -2 2.21739 1.97569   5
   8  10   2 -0.6417  2.4014   6
  -8  10  -2 3.47226 3.42983   6
  -8  10  -2 0.50054 2.32098   2
   9 -10   2 2.69321 3.05071   6
   9 -10   2 -0.6126  1.8377   2
  -9  10  -2 -0.3718  2.0952   3
   9  10   2 1.67358 2.94612   6
   9  10   2 -0.3155  1.7627   4
   9  10   2 4.54722 2.54452   2
  -9  10  -2 -0.5594  3.2161   6
  -9  10  -2 3.72246 2.29180   5
  10 -10   2 1.81254 2.90947   6
  10 -10   2 0.23562 2.53489   2
  10  10   2 0.55053 2.03542   4
  10  10   2 3.62135 2.11575   2
 -10  10  -2 -0.0244  1.8202   3
 -10  10  -2 0.55890 3.60885   6
  10  10   2 0.43120 3.05893   6
 -10  10  -2 -0.5746  1.7619   5
  11 -10   2 -1.2541  2.5464   6
  11 -10   2 -0.8612  2.1591   2
 -11  10  -2 0.66884 2.08841   5
 -11  10  -2 -1.1007  1.7563   3
  11  10   2 -0.5689  2.1542   2
  11  10   2 -0.3256  2.6206   4
  12 -10   2 -0.1467  2.5943   2
  12 -10   2 0.69290 3.44721   6
 -12  10  -2 1.49234 2.74207   5
 -12  10  -2 -0.9097  2.2954   3
  12  10   2 1.10536 2.68955   4
  12  10   2 2.63287 2.49973   2
  13 -10   2 4.89295 3.49392   2
  13 -10   2 6.76423 4.81935   6
 -13  10  -2 4.78910 3.14525   5
  13  10   2 3.71593 3.10256   4
 -13  10  -2 2.78721 2.71974   3
  14 -10   2 9.76317 4.10882   6
  14 -10   2 -4.0464  2.7947   2
  14  10   2 1.57300 3.05523   4
 -14  10  -2 1.20045 3.08998   3
 -14  10  -2 4.56839 3.57690   5
  15 -10   2 -18.759   5.366   6
  15  10   2 0.85590 3.32680   4
  14 -11  -2 4.73114 4.01414   2
  14  11  -2 1.12740 3.30028   4
 -14  11   2 7.23634 3.91914   5
 -14  11   2 8.01566 3.49734   3
  13 -11  -2 -1.9026  2.9338   6
  13 -11  -2 -1.0706  2.8812   2
  13  11  -2 4.38436 3.23702   4
 -13  11   2 5.53144 3.36073   3
 -13  11   2 -1.1296  2.6781   5
 -12 -11   2 10.0954  4.5818   5
  12 -11  -2 7.59531 4.03876   4
  12 -11  -2 0.85877 2.98020   6
  12 -11  -2 1.12298 3.40703   2
 -12  11   2 5.70727 5.59291   6
 -12  11   2 5.79840 3.11687   5
  12  11  -2 2.20407 2.56590   4
 -12  11   2 5.00597 3.05754   3
  11 -11  -2 2.63510 3.05782   6
 -11 -11   2 0.20811 2.74232   5
  11 -11  -2 -0.4214  2.7406   2
  11 -11  -2 -3.5082  2.2620   4
  11  11  -2 1.50473 2.40929   4
 -11  11   2 -0.9947  4.4027   6
 -11  11   2 -1.5304  2.1331   3
 -11  11   2 1.29650 2.42888   5
 -10 -11   2 36.9308  5.4942   5
  10 -11  -2 33.8251  5.6802   2
  10 -11  -2 30.6130  5.6666   4
  10 -11  -2 23.1939  6.2907   6
 -10 -11   2 40.3423  5.5176   3
 -10  11   2 25.9735  4.6597   3
 -10  11   2 43.8945  6.7526   2
 -10  11   2 41.6513  5.5578   5
 -10  11   2 25.9629  7.5837   6
  10  11  -2 25.6379  4.8851   4
   9 -11  -2 -0.0981  2.6680   6
   9 -11  -2 -0.5881  2.0505   2
  -9 -11   2 -0.2107  2.2707   5
  -9 -11   2 -2.1175  1.8237   3
   9 -11  -2 2.31124 2.88404   4
  -9  11   2 -0.2361  3.2805   6
   9  11  -2 2.69875 2.17490   4
  -9  11   2 0.19557 1.91564   3
  -9  11   2 -0.6642  2.3717   2
  -9  11   2 -0.7496  1.7878   5
  -8 -11   2 81.7664  8.2268   5
   8 -11  -2 94.8519  9.5172   2
  -8 -11   2 75.8617  7.8243   3
   8 -11  -2 56.5752 10.8076   6
   8 -11  -2 73.4087  8.1637   4
  -8  11   2 82.6030 12.5262   6
   8  11  -2 78.1618  7.2635   2
   8  11  -2 75.4899  8.5961   4
  -8  11   2 76.7000  9.0106   2
  -8  11   2 85.3870  7.1106   5
  -8  11   2 86.1320  7.0403   3
   7 -11  -2 12.2434  3.0405   4
   7 -11  -2 14.2001  3.6007   2
  -7 -11   2 8.77966 2.70173   5
  -7 -11   2 9.43905 2.51031   3
   7 -11  -2 9.71391 3.92658   6
  -7  11   2 15.1504  3.6004   2
  -7  11   2 7.75403 2.65590   5
   7  11  -2 4.89424 2.40284   4
  -7  11   2 10.5720  4.5089   6
   7  11  -2 5.45040 2.30217   2
  -7  11   2 9.69097 2.52553   3
   6 -11  -2 65.2736  7.2512   4
   6 -11  -2 72.3771 10.8288   6
  -6 -11   2 58.6213  6.5507   3
   6 -11  -2 86.1813  8.6713   2
  -6 -11   2 83.1117  6.6597   5
  -6  11   2 68.0170  5.9700   3
   6  11  -2 58.5703  7.4427   4
  -6  11   2 75.1318 11.2926   6
   6  11  -2 68.0935  6.5850   2
  -6  11   2 59.0196  7.6293   2
   6  11  -2 83.4313 10.1484   6
   5 -11  -2 30.6690  4.3283   4
   5 -11  -2 18.0858  5.2611   6
  -5 -11   2 23.5991  3.6349   5
  -5 -11   2 22.1283  3.5644   3
   5 -11  -2 24.0837  4.4146   2
   5  11  -2 27.4796  4.0956   2
   5  11  -2 25.2572  5.2986   6
  -5  11   2 23.9424  6.0300   6
  -5  11   2 18.4269  3.9585   2
   5  11  -2 26.2065  4.2673   4
   4 -11  -2 21.7827  5.8112   6
  -4 -11   2 31.7291  3.8809   5
   4 -11  -2 26.7300  4.4899   2
   4 -11  -2 37.7042  4.7891   4
  -4 -11   2 30.2775  3.9356   3
   4  11  -2 36.2089  4.7294   4
  -4  11   2 23.6555  5.9706   6
   4  11  -2 22.4833  5.3488   6
   4  11  -2 31.1587  4.3590   2
  -4  11   2 30.0115  4.7144   2
  -3 -11   2 0.99748 1.35425   3
   3 -11  -2 4.83077 1.95541   4
  -3 -11   2 0.71656 1.45552   5
   3 -11  -2 0.88758 1.95333   2
   3  11  -2 0.51722 2.76514   6
  -3  11   2 2.57177 1.71872   2
   3  11  -2 0.88613 1.20673   3
   3  11  -2 1.13983 1.47672   2
   3  11  -2 0.60783 1.24693   5
  -3  11   2 -2.1535  2.6249   6
   2 -11  -2 125.291  10.120   4
  -2 -11   2 138.409   9.556   3
  -2 -11   2 136.817   9.698   5
   2  11  -2 124.527  14.602   6
   2  11  -2 120.845   9.150   3
  -2  11   2 115.416  10.458   2
   2  11  -2 138.541  10.452   2
   2  11  -2 135.241   9.349   5
  -2  11   2 117.544  15.019   6
   1 -11  -2 9.03439 2.74512   4
  -1 -11   2 6.74685 2.28194   4
  -1 -11   2 7.34551 2.22536   3
  -1 -11   2 7.13111 1.97841   5
   1  11  -2 6.15375 1.71992   3
   1  11  -2 9.82758 1.99236   5
  -1  11   2 11.3811  2.6642   2
   1  11  -2 9.95237 2.52920   2
   1  11  -2 3.84886 3.04786   6
  -1  11   2 2.52257 3.21689   6
   0 -11   2 288.961  19.613   5
   0 -11  -2 308.589  20.600   4
   0 -11   2 319.997  20.568   4
   0 -11   2 286.179  19.371   3
   0 -11   2 299.209  21.162   2
   0  11  -2 292.323  29.835   6
   0  11   2 262.688  29.645   6
   0  11  -2 286.893  21.006   2
   0  11  -2 298.956  19.402   5
   0  11  -2 279.585  19.086   3
   0  11   2 269.113  21.119   2
   1 -11   2 -0.1201  1.3005   2
   1 -11   2 0.34928 2.04432   6
  -1 -11  -2 1.37271 1.77919   4
   1 -11   2 -0.7116  1.2487   4
   1  11   2 0.96105 2.86957   6
  -1  11  -2 -1.1751  2.5161   6
  -1  11  -2 1.02432 1.19203   3
   1  11   2 0.53375 1.34535   2
  -1  11  -2 2.52894 1.82953   2
  -1  11  -2 2.99198 1.42887   5
   2 -11   2 222.366  16.331   4
  -2 -11  -2 238.919  17.060   4
   2 -11   2 246.960  24.761   6
   2 -11   2 234.588  17.406   2
   2  11   2 236.688  17.388   2
  -2  11  -2 234.030  15.877   5
   2  11   2 225.270  24.504   6
  -2  11  -2 221.026  24.367   6
  -2  11  -2 221.266  17.219   2
  -2  11  -2 234.048  15.645   3
   3 -11   2 -0.1069  1.7835   6
   3 -11   2 -0.8303  1.6514   2
  -3 -11  -2 0.10404 1.55700   4
   3 -11   2 0.46356 1.29256   4
   3  11   2 -0.1278  1.5636   2
  -3  11  -2 2.64018 3.53504   6
  -3  11  -2 1.57563 1.48404   2
   3  11   2 1.50282 3.00697   6
  -3  11  -2 1.42936 1.40784   3
  -3  11  -2 -0.8145  1.1320   5
   4 -11   2 32.5500  4.7327   2
   4 -11   2 28.6305  3.8424   4
   4 -11   2 23.4297  5.2835   6
   4  11   2 16.8294  3.6588   2
  -4  11  -2 23.7746  5.8102   6
  -4  11  -2 26.3155  3.6313   5
   4  11   2 13.7109  4.6911   6
  -4  11  -2 28.9717  3.7140   3
  -4  11  -2 19.0433  3.7572   2
   5 -11   2 85.5738 11.5737   6
   5 -11   2 86.4315  8.1777   2
   5 -11   2 90.1894  7.5098   4
  -5  11  -2 96.8756 12.4855   6
   5  11   2 90.2806 11.6845   6
  -5  11  -2 93.0062  8.3881   2
  -5  11  -2 83.8079  7.1988   5
  -5  11  -2 84.9497  7.2125   3
   5  11   2 92.3636  8.1267   2
   6 -11   2 46.3657  8.2660   6
   6 -11   2 54.7063  6.7229   2
   6 -11   2 65.8644  6.2234   4
  -6  11  -2 40.2866  8.4353   6
  -6  11  -2 60.7888  6.0666   3
  -6  11  -2 51.6235  5.7127   5
   6  11   2 49.1819  6.2893   2
  -6  11  -2 40.7716  6.1528   2
   6  11   2 43.1448  6.0491   4
   6  11   2 43.0746  8.0369   6
   7 -11   2 1.54734 2.21088   2
   7 -11   2 -0.8221  1.9655   6
   7 -11   2 0.51514 1.95228   4
   7  11   2 -2.5447  2.6271   6
  -7  11  -2 -0.1754  3.0567   6
  -7  11  -2 1.74634 1.72334   3
  -7  11  -2 0.42307 2.03111   2
  -7  11  -2 0.40419 1.70484   5
   7  11   2 -0.6255  1.5366   4
   7  11   2 1.74074 2.15537   2
   8 -11   2 103.129   9.473   2
   8 -11   2 97.2193  8.4783   4
   8 -11   2 112.821  13.536   6
  -8  11  -2 89.1135 13.8722   6
  -8  11  -2 109.551  11.187   2
  -8  11  -2 108.923   8.554   3
   8  11   2 111.467   9.374   2
  -8  11  -2 100.098   8.462   5
   8  11   2 85.0872  9.9657   4
   8  11   2 77.4947 12.7901   6
   9 -11   2 1.06210 2.19803   2
   9 -11   2 1.30693 2.60683   6
   9  11   2 1.94595 3.44488   6
  -9  11  -2 4.34771 2.45995   5
   9  11   2 3.08055 2.52925   2
  -9  11  -2 1.18680 1.98425   3
   9  11   2 -1.2973  2.1135   4
  -9  11  -2 -1.0974  2.9369   6
  10 -11   2 14.3967  5.0695   6
  10 -11   2 20.6425  4.9311   2
 -10  11  -2 23.8937  4.3408   5
  10  11   2 22.1721  4.6349   4
 -10  11  -2 22.3136  4.1115   3
  10  11   2 23.4278  4.8232   2
 -10  11  -2 22.2478  7.1547   6
  11 -11   2 -0.5961  3.3544   6
  11 -11   2 -0.6714  2.5027   2
 -11  11  -2 -0.6680  2.3169   3
  11  11   2 4.41783 2.53934   2
  11  11   2 4.77992 2.86249   4
 -11  11  -2 3.14032 2.63211   5
  12 -11   2 4.73606 3.41180   2
  12 -11   2 2.33246 4.16076   6
  12  11   2 11.3023  3.6359   2
 -12  11  -2 6.25614 3.09626   3
 -12  11  -2 11.4688  3.8244   5
  12  11   2 9.68129 4.06989   4
  13 -11   2 -0.2477  3.8380   6
  13 -11   2 3.23093 3.28057   2
 -13  11  -2 -1.2336  2.5999   5
  13  11   2 4.31277 3.20988   4
 -13  11  -2 -1.9864  2.6173   3
  14 -11   2 1.99644 3.31208   6
  14 -11   2 -0.9176  3.2078   2
 -14  11  -2 -2.6772  2.9431   3
 -14  11  -2 -0.9117  2.8122   5
  14  11   2 1.75851 3.28926   4
  14 -12  -2 -7.1044  3.1978   2
  13 -12  -2 1.85306 3.37878   2
  13 -12  -2 0.81933 4.06658   6
  13  12  -2 2.50282 3.11541   4
  12 -12  -2 0.69257 3.71440   6
  12 -12  -2 1.19584 3.37331   2
  12 -12  -2 3.29347 4.05272   4
 -12  12   2 -3.4416  4.5173   6
  12  12  -2 4.40589 3.45308   4
  11 -12  -2 0.18000 2.93679   4
  11 -12  -2 -1.9601  2.5043   6
  11 -12  -2 -1.2811  2.7852   2
  11  12  -2 2.70153 2.65331   4
 -11  12   2 0.31292 3.78381   6
  10 -12  -2 2.78618 3.46639   6
  10 -12  -2 1.73625 3.32370   4
  10 -12  -2 4.10572 3.16611   2
 -10  12   2 -0.5043  2.3667   2
 -10  12   2 2.69737 3.95698   6
  10  12  -2 1.89411 2.49608   4
   9 -12  -2 0.42446 2.31057   2
   9 -12  -2 1.59277 3.18667   6
   9 -12  -2 -3.3224  2.3244   4
  -9  12   2 0.57191 2.18995   2
   9  12  -2 2.50316 2.14132   4
  -9  12   2 4.68145 4.18998   6
   8 -12  -2 2.95692 2.76761   2
   8 -12  -2 1.93523 2.83373   6
   8 -12  -2 3.40041 2.73986   4
  -8  12   2 1.63558 3.94695   6
   8  12  -2 -1.3154  1.6196   4
  -8  12   2 0.67086 2.55100   2
   7 -12  -2 14.3207  3.8440   2
   7 -12  -2 23.8354  4.0258   4
   7 -12  -2 13.7406  4.6712   6
  -7  12   2 13.5002  5.4106   6
   7  12  -2 18.2475  3.9911   4
  -7  12   2 14.4828  3.8613   2
   7  12  -2 22.1030  4.0528   2
   6 -12  -2 -2.2382  1.9698   4
   6 -12  -2 -1.3942  1.8519   6
   6 -12  -2 0.25187 1.87043   2
   6  12  -2 2.02733 1.87617   4
  -6  12   2 -2.4644  2.4349   6
   6  12  -2 -1.3750  1.5477   2
  -6  12   2 -1.6805  1.7361   2
   6  12  -2 1.43409 3.04917   6
   5 -12  -2 1.40352 1.88813   2
   5 -12  -2 2.92375 2.44154   6
   5 -12  -2 0.64626 2.16543   4
  -5 -12   2 -0.7373  1.7389   5
   5  12  -2 -0.1736  1.6094   2
   5  12  -2 -1.9277  1.1777   4
  -5  12   2 -1.8293  3.2806   6
  -5  12   2 0.54431 1.88638   2
   5  12  -2 3.34938 3.16354   6
  -4 -12   2 15.9602  2.9119   5
   4 -12  -2 9.99561 2.94521   4
   4 -12  -2 7.77104 2.63801   2
   4 -12  -2 10.5934  3.9792   6
  -4  12   2 11.7655  4.3703   6
   4  12  -2 13.5973  3.2130   4
   4  12  -2 10.1121  3.9668   6
   4  12  -2 11.5435  2.8196   2
  -4  12   2 9.38296 3.08050   2
   3 -12  -2 3.97154 2.31760   4
   3 -12  -2 -0.0985  1.5768   2
  -3 -12   2 3.31354 1.75995   5
  -3 -12   2 -0.3575  1.3064   3
   3  12  -2 1.81033 1.58276   2
   3  12  -2 4.67517 3.30341   6
   3  12  -2 3.55173 1.64874   5
   3  12  -2 0.06204 1.11129   3
  -3  12   2 2.45823 1.97370   2
  -3  12   2 -2.3204  3.2152   6
  -2 -12   2 4.89521 1.75423   5
   2 -12  -2 -0.2223  1.6594   4
  -2 -12   2 0.61100 1.55985   3
   2 -12  -2 1.63052 1.70271   2
   2  12  -2 0.92296 1.28562   5
  -2  12   2 1.62433 1.64487   2
   2  12  -2 -0.1876  2.8558   6
   2  12  -2 -0.3814  1.2559   3
  -2  12   2 -0.6771  2.7065   6
   2  12  -2 0.19215 1.68207   2
  -1 -12   2 7.98768 2.20034   5
  -1 -12   2 6.63701 2.55918   4
   1 -12  -2 10.0025  2.7920   4
  -1 -12   2 8.62495 2.10985   3
   1  12  -2 3.86798 2.17418   2
  -1  12   2 7.93345 3.95626   6
  -1  12   2 5.36551 2.24570   2
   1  12  -2 10.3123  2.1494   5
   1  12  -2 4.19042 3.52199   6
   1  12  -2 4.21748 1.70697   3
   0 -12  -2 0.71986 2.04978   4
   0 -12   2 -1.1696  1.3245   5
   0 -12   2 -1.1903  1.1494   3
   0 -12   2 1.47496 1.61959   2
   0 -12   2 0.08350 1.85861   4
   0  12  -2 1.03043 3.20340   6
   0  12   2 1.31113 1.64564   2
   0  12   2 1.41246 2.94652   6
   0  12  -2 2.16349 1.38848   3
   0  12  -2 2.74498 1.74361   2
   0  12  -2 1.54092 1.33845   5
   1 -12   2 23.8923  4.2581   2
   1 -12   2 23.7424  5.6920   6
  -1 -12  -2 35.3981  5.1404   4
   1 -12   2 35.3433  4.7459   4
  -1  12  -2 44.6348  4.4584   5
   1  12   2 25.5435  6.2172   6
  -1  12  -2 44.9924  4.4168   3
   1  12   2 38.7330  5.2313   2
  -1  12  -2 37.0689  4.9913   2
  -1  12  -2 25.9889  6.2165   6
  -2 -12  -2 1.15981 1.84164   4
   2 -12   2 -1.6947  1.5506   6
   2 -12   2 2.00995 1.91292   4
   2 -12   2 -1.6954  1.7946   2
  -2  12  -2 4.59080 1.80227   5
  -2  12  -2 -1.8564  2.8725   6
  -2  12  -2 -0.2134  1.1614   3
   2  12   2 1.47020 2.99558   6
  -2  12  -2 2.82072 1.77384   2
   2  12   2 3.71176 2.06593   2
  -3 -12  -2 -1.0353  1.6421   4
   3 -12   2 -0.0684  1.8794   6
   3 -12   2 1.85457 1.66642   4
   3 -12   2 4.57163 2.01021   2
  -3  12  -2 -0.2824  1.2221   3
   3  12   2 2.58739 1.86362   2
  -3  12  -2 3.78426 3.29198   6
   3  12   2 2.06491 3.48481   6
  -3  12  -2 2.13043 1.51235   5
  -3  12  -2 -0.8574  1.6554   2
   4 -12   2 14.2523  3.4962   2
   4 -12   2 21.0118  5.3070   6
   4 -12   2 19.0752  3.3356   4
   4  12   2 21.2535  3.9552   2
  -4  12  -2 13.4758  4.6788   6
  -4  12  -2 11.5328  3.1321   2
  -4  12  -2 19.8746  3.3164   3
  -4  12  -2 21.0331  3.3219   5
   4  12   2 19.6082  5.1455   6
   5 -12   2 5.88129 2.60221   2
   5 -12   2 10.9519  3.9904   6
   5 -12   2 4.47470 2.17090   4
  -5  12  -2 4.57749 2.27888   2
  -5  12  -2 7.59999 2.37034   3
  -5  12  -2 2.95157 3.22695   6
  -5  12  -2 7.10280 2.32687   5
   5  12   2 4.64808 3.92469   6
   5  12   2 6.45417 2.65851   2
   6 -12   2 -0.4797  1.9845   6
   6 -12   2 6.58838 2.43078   4
   6 -12   2 1.65665 2.09286   2
  -6  12  -2 -1.1806  3.3016   6
  -6  12  -2 7.32210 2.41713   5
   6  12   2 2.60108 1.91166   2
  -6  12  -2 2.93524 2.43801   2
   6  12   2 2.80063 3.14286   6
  -6  12  -2 1.19441 1.77081   3
   7 -12   2 5.20744 2.47533   4
   7 -12   2 -1.4781  1.6194   2
   7 -12   2 4.04915 3.30090   6
   7  12   2 1.11924 2.23400   4
   7  12   2 0.86964 1.72533   2
  -7  12  -2 2.79536 2.11409   3
  -7  12  -2 1.68031 2.44914   2
  -7  12  -2 -1.2683  3.0416   6
   7  12   2 0.83008 3.37908   6
  -7  12  -2 0.04330 1.75468   5
   8 -12   2 0.35107 2.46769   6
   8 -12   2 -2.9153  1.6843   2
   8  12   2 -0.2578  1.8859   4
  -8  12  -2 -1.7140  1.8318   5
  -8  12  -2 1.49137 2.00274   3
  -8  12  -2 -2.6459  2.8501   6
   8  12   2 1.10165 2.29416   2
  -8  12  -2 -0.0445  2.0678   2
   8  12   2 -1.4126  2.8668   6
   9 -12   2 0.77680 2.48088   2
   9 -12   2 -0.4770  2.6504   6
   9  12   2 0.14259 2.30465   4
   9  12   2 3.27142 3.50505   6
  -9  12  -2 0.59468 4.13579   6
   9  12   2 4.59783 2.58970   2
  -9  12  -2 5.54448 2.54012   3
  -9  12  -2 3.80277 2.44866   5
  10 -12   2 4.77725 4.10477   6
  10 -12   2 2.01902 2.57383   2
 -10  12  -2 1.20943 2.03564   3
  10  12   2 6.86831 3.39795   4
 -10  12  -2 1.55764 2.39209   5
  10  12   2 4.50689 2.84186   2
 -10  12  -2 4.43890 4.16556   6
  11 -12   2 2.71076 3.01371   2
  11 -12   2 2.78499 3.75153   6
 -11  12  -2 1.62873 4.54236   6
  11  12   2 1.26007 2.65806   2
  11  12   2 3.61359 3.32064   4
 -11  12  -2 8.38275 3.31011   3
 -11  12  -2 0.48729 2.08562   5
  12 -12   2 0.04755 3.12995   6
  12 -12   2 -1.9569  3.0431   2
 -12  12  -2 -1.1968  2.4111   5
  12  12   2 1.05754 2.65359   2
 -12  12  -2 -1.0967  2.1268   3
  12  12   2 -1.5706  2.9456   4
  13 -12   2 -0.1531  3.4528   2
  13 -12   2 5.01239 4.29070   6
  13  12   2 0.25043 3.21318   4
 -13  12  -2 0.92564 3.09957   5
 -13  12  -2 -3.0419  2.7607   3
  14 -12   2 -0.0753  3.8496   6
 -14  12  -2 1.36672 3.50457   5
 -14  12  -2 -3.9842  3.0598   3
  13 -13  -2 -0.7115  3.3069   2
  13 -13  -2 -0.4121  3.6338   6
  12 -13  -2 3.73989 4.38536   6
  12 -13  -2 -0.0039  3.0301   2
 -12  13   2 3.38971 5.41264   6
  12  13  -2 3.18429 3.24807   4
  11 -13  -2 15.0485  4.9069   4
  11 -13  -2 9.66323 4.20644   2
  11 -13  -2 11.3333  5.2412   6
  11  13  -2 13.2774  4.2552   4
 -11  13   2 16.0204  6.2966   6
  10 -13  -2 -0.3584  2.6595   2
  10 -13  -2 2.51561 3.36757   4
  10 -13  -2 0.12107 3.23284   6
 -10  13   2 1.12276 3.95982   6
 -10  13   2 -0.0880  2.6246   2
  10  13  -2 -0.0372  2.7520   4
   9 -13  -2 27.6687  5.0823   4
   9 -13  -2 28.6748  7.1479   6
   9 -13  -2 36.7137  5.9465   2
  -9  13   2 39.8183  6.5218   2
  -9  13   2 18.1751  6.4774   6
   9  13  -2 24.8067  5.1469   4
   8 -13  -2 -0.5533  2.2324   4
   8 -13  -2 -1.1934  2.4810   2
   8 -13  -2 3.66115 3.28220   6
   8  13  -2 -0.1623  2.4026   4
  -8  13   2 2.80241 3.04640   2
  -8  13   2 5.11212 4.25972   6
   7 -13  -2 24.7775  6.6703   6
   7 -13  -2 34.6649  5.4379   4
   7 -13  -2 33.8292  5.5825   2
   7  13  -2 26.8287  4.7625   2
  -7  13   2 41.4706  6.2453   2
   7  13  -2 30.6888  5.2407   4
   6 -13  -2 5.79456 3.47477   6
   6 -13  -2 1.26163 2.55627   4
   6 -13  -2 6.33182 3.00459   2
   6  13  -2 7.21789 2.97012   4
  -6  13   2 1.54259 3.29748   6
   6  13  -2 7.28057 2.79831   2
  -6  13   2 1.41168 2.02532   2
   5 -13  -2 69.7441  8.5098   2
   5 -13  -2 73.8474  8.2915   4
   5 -13  -2 71.6600 11.8298   6
   5  13  -2 103.313   8.003   2
   5  13  -2 84.4473 11.0203   6
  -5  13   2 83.1359  9.2164   2
   5  13  -2 80.3810  8.8187   4
  -5  13   2 64.9644 11.3918   6
   4 -13  -2 5.73586 3.22642   6
   4 -13  -2 7.82017 2.71467   4
   4 -13  -2 4.59400 2.53613   2
  -4  13   2 6.51543 2.78970   2
   4  13  -2 4.03332 2.29683   2
  -4  13   2 2.14268 3.79951   6
   4  13  -2 7.69698 3.92922   6
   3 -13  -2 2.91797 2.51211   2
   3 -13  -2 6.11586 2.48261   4
  -3  13   2 5.85189 4.18774   6
   3  13  -2 5.36951 3.58891   6
  -3  13   2 5.35847 2.47063   2
   3  13  -2 8.90624 2.65281   2
  -2 -13   2 2.40207 2.04463   4
   2 -13  -2 3.11846 2.56321   4
   2 -13  -2 0.39391 1.88172   2
  -2  13   2 0.31425 2.86091   6
  -2  13   2 0.56506 1.69110   2
   2  13  -2 0.44871 3.04711   6
   2  13  -2 -0.8644  1.6007   2
  -1 -13   2 154.658  12.066   4
   1 -13  -2 149.827  11.986   4
   1  13  -2 141.586  17.130   6
  -1  13   2 143.112  17.410   6
   1  13  -2 153.633  12.187   2
  -1  13   2 158.773  12.618   2
   0 -13   2 22.6978  4.1417   2
   0 -13  -2 28.0091  4.6430   4
   0 -13   2 29.5970  4.7769   4
   0  13  -2 22.6011  5.9260   6
   0  13   2 25.3164  4.5279   2
   0  13  -2 28.1506  4.5760   2
   0  13   2 18.3791  5.4212   6
  -1 -13  -2 55.5360  6.7860   4
   1 -13   2 29.5767  7.0013   6
   1 -13   2 48.3577  5.8657   4
   1 -13   2 63.2773  6.8482   2
  -1  13  -2 41.4606  7.6700   6
   1  13   2 44.4390  8.2354   6
   1  13   2 48.8590  6.3845   2
  -1  13  -2 46.6611  6.0740   2
   2 -13   2 -0.8007  1.7958   4
  -2 -13  -2 -0.8628  1.7336   4
   2 -13   2 1.89191 1.82625   2
   2 -13   2 0.90692 2.37480   6
   2  13   2 0.83416 2.84995   6
  -2  13  -2 -0.1363  2.5947   6
  -2  13  -2 1.05565 1.67732   2
   2  13   2 0.61697 1.61604   2
   3 -13   2 0.31353 2.18390   6
   3 -13   2 1.54064 2.11374   2
  -3 -13  -2 -1.2356  1.7951   4
   3 -13   2 0.48200 1.88267   4
  -3  13  -2 1.19927 2.06269   2
   3  13   2 0.87626 1.96668   2
  -3  13  -2 -1.7710  2.5082   6
  -3  13  -2 0.68476 1.32315   3
   3  13   2 2.22368 3.16680   6
   4 -13   2 3.84236 3.35961   6
  -4 -13  -2 2.11380 2.27094   4
   4 -13   2 2.51614 2.48010   2
   4 -13   2 3.22701 2.27404   4
   4  13   2 -0.1113  3.4545   6
  -4  13  -2 2.78850 3.19136   6
  -4  13  -2 6.75721 2.72119   2
   4  13   2 5.55166 2.46120   2
  -4  13  -2 3.85522 1.94515   3
  -4  13  -2 5.02675 2.35855   5
   5 -13   2 157.816  18.899   6
   5 -13   2 171.660  13.571   2
   5 -13   2 169.915  12.480   4
  -5  13  -2 169.344  12.179   5
   5  13   2 164.479  13.305   2
  -5  13  -2 155.473  11.906   3
   5  13   2 167.377  19.073   6
  -5  13  -2 146.893  13.222   2
  -5  13  -2 148.341  18.804   6
   6 -13   2 10.7882  4.5428   6
   6 -13   2 28.1311  5.0354   2
   6 -13   2 18.9352  3.8153   4
   6  13   2 17.5700  5.6849   6
  -6  13  -2 14.4393  5.2452   6
   6  13   2 23.2065  4.6595   2
  -6  13  -2 17.9549  4.1851   2
  -6  13  -2 18.8393  3.6100   3
  -6  13  -2 17.5970  3.6646   5
   7 -13   2 40.1996  5.8489   2
   7 -13   2 37.9949  5.3272   4
   7 -13   2 21.4408  6.3398   6
   7  13   2 35.9876  7.7802   6
  -7  13  -2 24.0564  6.8481   6
  -7  13  -2 36.5286  6.0710   2
   7  13   2 37.7334  5.6255   2
  -7  13  -2 35.7648  5.0314   3
  -7  13  -2 35.9615  5.0750   5
   8 -13   2 3.65911 2.88008   2
   8 -13   2 7.21464 3.81712   6
  -8  13  -2 8.06586 3.11321   2
   8  13   2 -0.3495  2.1283   4
   8  13   2 2.82273 3.87115   6
  -8  13  -2 9.66073 3.01845   5
   8  13   2 5.44361 2.86253   2
  -8  13  -2 4.74717 4.51799   6
  -8  13  -2 1.82350 2.28924   3
   9 -13   2 22.6455  6.1627   6
   9 -13   2 24.1525  4.9113   2
  -9  13  -2 24.4895  4.5466   3
   9  13   2 27.7278  5.4789   4
  -9  13  -2 28.3325  4.9685   5
   9  13   2 24.2990  6.4747   6
  -9  13  -2 21.3580  6.8774   6
  -9  13  -2 31.4544  6.0842   2
   9  13   2 29.4531  5.4952   2
  10 -13   2 -0.9589  2.5832   2
  10 -13   2 -1.6262  2.9110   6
  10  13   2 2.23885 2.78398   4
 -10  13  -2 -1.8232  4.1173   6
 -10  13  -2 -0.7584  2.1517   5
 -10  13  -2 -2.5546  1.9704   3
  10  13   2 2.66515 2.77748   2
  11 -13   2 0.85217 3.03649   2
  11 -13   2 5.57025 4.52099   6
 -11  13  -2 5.75065 5.28416   6
  11  13   2 10.6835  4.4094   4
 -11  13  -2 7.44903 3.19493   5
 -11  13  -2 8.75248 3.51084   3
  11  13   2 1.82701 2.86089   2
  12 -13   2 -4.0515  3.4113   6
  12 -13   2 -2.1674  2.4010   2
 -12  13  -2 -0.3451  2.5807   3
  12  13   2 8.76002 4.29127   4
 -12  13  -2 10.6132  3.9740   5
  13 -13   2 -3.0509  3.7548   6
  13 -13   2 -2.3227  2.8888   2
 -13  13  -2 1.31086 2.58159   5
 -13  13  -2 -3.9645  2.3512   3
  13  13   2 2.15141 3.28926   4
  13 -14  -2 -3.2672  3.6925   6
 -13  14   2 -7.0225  5.1482   6
  12 -14  -2 -0.0907  3.5707   6
  12 -14  -2 -3.1668  2.5785   2
  12  14  -2 1.52227 2.95252   4
 -12  14   2 1.39954 5.39532   6
  11 -14  -2 6.05603 3.98809   4
  11 -14  -2 0.19920 3.58132   6
  11 -14  -2 2.01077 3.57880   2
 -11  14   2 -3.1121  3.4860   6
  11  14  -2 1.75093 2.90075   4
  10 -14  -2 4.77512 3.80023   4
  10 -14  -2 -2.8845  2.3226   6
  10 -14  -2 -4.5189  2.5648   2
  10  14  -2 1.35347 2.34631   4
 -10  14   2 -2.9811  2.2879   2
 -10  14   2 1.64915 3.93731   6
   9 -14  -2 -0.0822  2.7924   6
   9 -14  -2 2.64409 3.35419   4
   9 -14  -2 2.03414 3.02459   2
  -9  14   2 2.25448 4.59289   6
   9  14  -2 3.74570 2.74070   4
[truncated: 8,673,269 more chars]
